# Supplementary material for: Influence of individual models and studies on quantitative mitigation findings in the IPCC Sixth Assessment Report
Source: Research Square preprint supplement (doi:10.21203/rs.3.rs-5698716/v1), 2025-01-13
Supplement: Supplementary file 1 [file 013c2828ac44c7094ad4db1e.xlsx]

## Sheet: C1
	AIM	C-ROADS	COFFEE	EPPA	GCAM	GEM-E3	IMAGE	MERGE-ETL	MESSAGE	POLES	REMIND	TIAM	WITCH		Total number of scenarios			Number of models that report variable			Dominant Model		Dominant Model (>1 model)
'AR6 climate diagnostics|Effective Radiative Forcing|Basket|Greenhouse Gases|CICERO-SCM|50.0th Percentile'	4	3	1	0	5	2	7	0	19	4	37	0	9		91			10			REMIND		REMIND
'AR6 climate diagnostics|Effective Radiative Forcing|Basket|Greenhouse Gases|FaIRv1.6.2|50.0th Percentile'	4	3	1	0	5	2	7	0	19	4	37	0	9		91			10			REMIND		REMIND
'AR6 climate diagnostics|Effective Radiative Forcing|Basket|Non-CO2 Greenhouse Gases|CICERO-SCM|50.0th Percentile'	4	3	1	0	5	2	7	0	19	4	37	0	9		91			10			REMIND		REMIND
'AR6 climate diagnostics|Effective Radiative Forcing|Basket|Non-CO2 Greenhouse Gases|FaIRv1.6.2|50.0th Percentile'	4	3	1	0	5	2	7	0	19	4	37	0	9		91			10			REMIND		REMIND
'AR6 climate diagnostics|Effective Radiative Forcing|CH4|CICERO-SCM|50.0th Percentile'	4	3	1	0	5	2	7	0	19	4	37	0	9		91			10			REMIND		REMIND
'AR6 climate diagnostics|Effective Radiative Forcing|CH4|FaIRv1.6.2|50.0th Percentile'	4	3	1	0	5	2	7	0	19	4	37	0	9		91			10			REMIND		REMIND
'AR6 climate diagnostics|Effective Radiative Forcing|CICERO-SCM|33.0th Percentile'	4	3	1	0	5	2	7	0	19	4	37	0	9		91			10			REMIND		REMIND
'AR6 climate diagnostics|Effective Radiative Forcing|CICERO-SCM|5.0th Percentile'	4	3	1	0	5	2	7	0	19	4	37	0	9		91			10			REMIND		REMIND
'AR6 climate diagnostics|Effective Radiative Forcing|CICERO-SCM|50.0th Percentile'	4	3	1	0	5	2	7	0	19	4	37	0	9		91			10			REMIND		REMIND
'AR6 climate diagnostics|Effective Radiative Forcing|CICERO-SCM|67.0th Percentile'	4	3	1	0	5	2	7	0	19	4	37	0	9		91			10			REMIND		REMIND
'AR6 climate diagnostics|Effective Radiative Forcing|CICERO-SCM|95.0th Percentile'	4	3	1	0	5	2	7	0	19	4	37	0	9		91			10			REMIND		REMIND
'AR6 climate diagnostics|Effective Radiative Forcing|CO2|CICERO-SCM|50.0th Percentile'	4	3	1	0	5	2	7	0	19	4	37	0	9		91			10			REMIND		REMIND
'AR6 climate diagnostics|Effective Radiative Forcing|CO2|FaIRv1.6.2|50.0th Percentile'	4	3	1	0	5	2	7	0	19	4	37	0	9		91			10			REMIND		REMIND
'AR6 climate diagnostics|Effective Radiative Forcing|FaIRv1.6.2|33.0th Percentile'	4	3	1	0	5	2	7	0	19	4	37	0	9		91			10			REMIND		REMIND
'AR6 climate diagnostics|Effective Radiative Forcing|FaIRv1.6.2|5.0th Percentile'	4	3	1	0	5	2	7	0	19	4	37	0	9		91			10			REMIND		REMIND
'AR6 climate diagnostics|Effective Radiative Forcing|FaIRv1.6.2|50.0th Percentile'	4	3	1	0	5	2	7	0	19	4	37	0	9		91			10			REMIND		REMIND
'AR6 climate diagnostics|Effective Radiative Forcing|FaIRv1.6.2|67.0th Percentile'	4	3	1	0	5	2	7	0	19	4	37	0	9		91			10			REMIND		REMIND
'AR6 climate diagnostics|Effective Radiative Forcing|FaIRv1.6.2|95.0th Percentile'	4	3	1	0	5	2	7	0	19	4	37	0	9		91			10			REMIND		REMIND
'AR6 climate diagnostics|Effective Radiative Forcing|MAGICCv7.5.3|33.0th Percentile'	4	3	1	0	6	2	7	0	20	4	41	0	9		97			10			REMIND		REMIND
'AR6 climate diagnostics|Effective Radiative Forcing|MAGICCv7.5.3|5.0th Percentile'	4	3	1	0	6	2	7	0	20	4	41	0	9		97			10			REMIND		REMIND
'AR6 climate diagnostics|Effective Radiative Forcing|MAGICCv7.5.3|50.0th Percentile'	4	3	1	0	6	2	7	0	20	4	41	0	9		97			10			REMIND		REMIND
'AR6 climate diagnostics|Effective Radiative Forcing|MAGICCv7.5.3|67.0th Percentile'	4	3	1	0	6	2	7	0	20	4	41	0	9		97			10			REMIND		REMIND
'AR6 climate diagnostics|Effective Radiative Forcing|MAGICCv7.5.3|95.0th Percentile'	4	3	1	0	6	2	7	0	20	4	41	0	9		97			10			REMIND		REMIND
'AR6 climate diagnostics|Emissions|Kyoto Gases (AR5-GWP100)'	4	3	1	0	6	2	7	0	20	4	41	0	9		97			10			REMIND		REMIND
'AR6 climate diagnostics|Emissions|Kyoto Gases (AR6-GWP100)'	4	3	1	0	6	2	7	0	20	4	41	0	9		97			10			REMIND		REMIND
'AR6 climate diagnostics|Exceedance Probability 1.5C|CICERO-SCM'	4	3	1	0	5	2	7	0	19	4	37	0	9		91			10			REMIND		REMIND
'AR6 climate diagnostics|Exceedance Probability 1.5C|FaIRv1.6.2'	4	3	1	0	5	2	7	0	19	4	37	0	9		91			10			REMIND		REMIND
'AR6 climate diagnostics|Exceedance Probability 1.5C|MAGICCv7.5.3'	4	3	1	0	6	2	7	0	20	4	41	0	9		97			10			REMIND		REMIND
'AR6 climate diagnostics|Exceedance Probability 2.0C|CICERO-SCM'	4	3	1	0	5	2	7	0	19	4	37	0	9		91			10			REMIND		REMIND
'AR6 climate diagnostics|Exceedance Probability 2.0C|FaIRv1.6.2'	4	3	1	0	5	2	7	0	19	4	37	0	9		91			10			REMIND		REMIND
'AR6 climate diagnostics|Exceedance Probability 2.0C|MAGICCv7.5.3'	4	3	1	0	6	2	7	0	20	4	41	0	9		97			10			REMIND		REMIND
'AR6 climate diagnostics|Exceedance Probability 2.5C|CICERO-SCM'	4	3	1	0	5	2	7	0	19	4	37	0	9		91			10			REMIND		REMIND
'AR6 climate diagnostics|Exceedance Probability 2.5C|FaIRv1.6.2'	4	3	1	0	5	2	7	0	19	4	37	0	9		91			10			REMIND		REMIND
'AR6 climate diagnostics|Exceedance Probability 2.5C|MAGICCv7.5.3'	4	3	1	0	6	2	7	0	20	4	41	0	9		97			10			REMIND		REMIND
'AR6 climate diagnostics|Exceedance Probability 3.0C|CICERO-SCM'	4	3	1	0	5	2	7	0	19	4	37	0	9		91			10			REMIND		REMIND
'AR6 climate diagnostics|Exceedance Probability 3.0C|FaIRv1.6.2'	4	3	1	0	5	2	7	0	19	4	37	0	9		91			10			REMIND		REMIND
'AR6 climate diagnostics|Exceedance Probability 3.0C|MAGICCv7.5.3'	4	3	1	0	6	2	7	0	20	4	41	0	9		97			10			REMIND		REMIND
'AR6 climate diagnostics|Infilled|Emissions|CH4'	4	3	1	0	6	2	7	0	20	4	41	0	9		97			10			REMIND		REMIND
'AR6 climate diagnostics|Infilled|Emissions|CO2'	4	3	1	0	6	2	7	0	20	4	41	0	9		97			10			REMIND		REMIND
'AR6 climate diagnostics|Infilled|Emissions|F-Gases'	4	0	0	0	6	2	7	0	13	4	41	0	9		86			8			REMIND		REMIND
'AR6 climate diagnostics|Infilled|Emissions|Kyoto Gases (AR5-GWP100)'	4	3	1	0	6	2	7	0	20	4	41	0	9		97			10			REMIND		REMIND
'AR6 climate diagnostics|Infilled|Emissions|Kyoto Gases (AR6-GWP100)'	4	3	1	0	6	2	7	0	20	4	41	0	9		97			10			REMIND		REMIND
'AR6 climate diagnostics|Infilled|Emissions|N2O'	4	3	1	0	6	2	7	0	20	4	41	0	9		97			10			REMIND		REMIND
'AR6 climate diagnostics|Native-with-Infilled|Emissions|Kyoto Gases (AR5-GWP100)'	4	3	1	0	6	2	7	0	20	4	41	0	9		97			10			REMIND		REMIND
'AR6 climate diagnostics|Native-with-Infilled|Emissions|Kyoto Gases (AR6-GWP100)'	4	3	1	0	6	2	7	0	20	4	41	0	9		97			10			REMIND		REMIND
'AR6 climate diagnostics|Surface Temperature (GSAT)|CICERO-SCM|10.0th Percentile'	4	3	1	0	5	2	7	0	19	4	37	0	9		91			10			REMIND		REMIND
'AR6 climate diagnostics|Surface Temperature (GSAT)|CICERO-SCM|16.7th Percentile'	4	3	1	0	5	2	7	0	19	4	37	0	9		91			10			REMIND		REMIND
'AR6 climate diagnostics|Surface Temperature (GSAT)|CICERO-SCM|33.0th Percentile'	4	3	1	0	5	2	7	0	19	4	37	0	9		91			10			REMIND		REMIND
'AR6 climate diagnostics|Surface Temperature (GSAT)|CICERO-SCM|5.0th Percentile'	4	3	1	0	5	2	7	0	19	4	37	0	9		91			10			REMIND		REMIND
'AR6 climate diagnostics|Surface Temperature (GSAT)|CICERO-SCM|50.0th Percentile'	4	3	1	0	5	2	7	0	19	4	37	0	9		91			10			REMIND		REMIND
'AR6 climate diagnostics|Surface Temperature (GSAT)|CICERO-SCM|67.0th Percentile'	4	3	1	0	5	2	7	0	19	4	37	0	9		91			10			REMIND		REMIND
'AR6 climate diagnostics|Surface Temperature (GSAT)|CICERO-SCM|83.3th Percentile'	4	3	1	0	5	2	7	0	19	4	37	0	9		91			10			REMIND		REMIND
'AR6 climate diagnostics|Surface Temperature (GSAT)|CICERO-SCM|90.0th Percentile'	4	3	1	0	5	2	7	0	19	4	37	0	9		91			10			REMIND		REMIND
'AR6 climate diagnostics|Surface Temperature (GSAT)|CICERO-SCM|95.0th Percentile'	4	3	1	0	5	2	7	0	19	4	37	0	9		91			10			REMIND		REMIND
'AR6 climate diagnostics|Surface Temperature (GSAT)|FaIRv1.6.2|10.0th Percentile'	4	3	1	0	5	2	7	0	19	4	37	0	9		91			10			REMIND		REMIND
'AR6 climate diagnostics|Surface Temperature (GSAT)|FaIRv1.6.2|16.7th Percentile'	4	3	1	0	5	2	7	0	19	4	37	0	9		91			10			REMIND		REMIND
'AR6 climate diagnostics|Surface Temperature (GSAT)|FaIRv1.6.2|33.0th Percentile'	4	3	1	0	5	2	7	0	19	4	37	0	9		91			10			REMIND		REMIND
'AR6 climate diagnostics|Surface Temperature (GSAT)|FaIRv1.6.2|5.0th Percentile'	4	3	1	0	5	2	7	0	19	4	37	0	9		91			10			REMIND		REMIND
'AR6 climate diagnostics|Surface Temperature (GSAT)|FaIRv1.6.2|50.0th Percentile'	4	3	1	0	5	2	7	0	19	4	37	0	9		91			10			REMIND		REMIND
'AR6 climate diagnostics|Surface Temperature (GSAT)|FaIRv1.6.2|67.0th Percentile'	4	3	1	0	5	2	7	0	19	4	37	0	9		91			10			REMIND		REMIND
'AR6 climate diagnostics|Surface Temperature (GSAT)|FaIRv1.6.2|83.3th Percentile'	4	3	1	0	5	2	7	0	19	4	37	0	9		91			10			REMIND		REMIND
'AR6 climate diagnostics|Surface Temperature (GSAT)|FaIRv1.6.2|90.0th Percentile'	4	3	1	0	5	2	7	0	19	4	37	0	9		91			10			REMIND		REMIND
'AR6 climate diagnostics|Surface Temperature (GSAT)|FaIRv1.6.2|95.0th Percentile'	4	3	1	0	5	2	7	0	19	4	37	0	9		91			10			REMIND		REMIND
'AR6 climate diagnostics|Surface Temperature (GSAT)|MAGICCv7.5.3|10.0th Percentile'	4	3	1	0	6	2	7	0	20	4	41	0	9		97			10			REMIND		REMIND
'AR6 climate diagnostics|Surface Temperature (GSAT)|MAGICCv7.5.3|16.7th Percentile'	4	3	1	0	6	2	7	0	20	4	41	0	9		97			10			REMIND		REMIND
'AR6 climate diagnostics|Surface Temperature (GSAT)|MAGICCv7.5.3|33.0th Percentile'	4	3	1	0	6	2	7	0	20	4	41	0	9		97			10			REMIND		REMIND
'AR6 climate diagnostics|Surface Temperature (GSAT)|MAGICCv7.5.3|5.0th Percentile'	4	3	1	0	6	2	7	0	20	4	41	0	9		97			10			REMIND		REMIND
'AR6 climate diagnostics|Surface Temperature (GSAT)|MAGICCv7.5.3|50.0th Percentile'	4	3	1	0	6	2	7	0	20	4	41	0	9		97			10			REMIND		REMIND
'AR6 climate diagnostics|Surface Temperature (GSAT)|MAGICCv7.5.3|67.0th Percentile'	4	3	1	0	6	2	7	0	20	4	41	0	9		97			10			REMIND		REMIND
'AR6 climate diagnostics|Surface Temperature (GSAT)|MAGICCv7.5.3|83.3th Percentile'	4	3	1	0	6	2	7	0	20	4	41	0	9		97			10			REMIND		REMIND
'AR6 climate diagnostics|Surface Temperature (GSAT)|MAGICCv7.5.3|90.0th Percentile'	4	3	1	0	6	2	7	0	20	4	41	0	9		97			10			REMIND		REMIND
'AR6 climate diagnostics|Surface Temperature (GSAT)|MAGICCv7.5.3|95.0th Percentile'	4	3	1	0	6	2	7	0	20	4	41	0	9		97			10			REMIND		REMIND
'Agricultural Demand'	3	0	0	0	5	0	7	0	12	0	25	0	5		57			6			REMIND		REMIND
'Agricultural Demand|Crops'	0	0	0	0	1	0	7	0	11	0	20	0	5		44			5			REMIND		REMIND
'Agricultural Demand|Crops|Energy'	0	0	0	0	5	0	7	0	9	0	24	0	5		50			5			REMIND		REMIND
'Agricultural Demand|Crops|Energy|1st generation'	0	0	0	0	0	0	7	0	10	0	19	0	5		41			4			REMIND		REMIND
'Agricultural Demand|Crops|Energy|2nd generation'	0	0	0	0	0	0	7	0	10	0	19	0	5		41			4			REMIND		REMIND
'Agricultural Demand|Crops|Feed'	1	0	0	0	5	0	7	0	9	0	24	0	5		51			6			REMIND		REMIND
'Agricultural Demand|Crops|Food'	1	0	0	0	0	0	7	0	9	0	24	0	5		46			5			REMIND		REMIND
'Agricultural Demand|Crops|Other'	1	0	0	0	5	0	7	0	9	0	24	0	5		51			6			REMIND		REMIND
'Agricultural Demand|Livestock'	0	0	0	0	6	0	7	0	10	0	20	0	5		48			5			REMIND		REMIND
'Agricultural Demand|Livestock|Food'	1	0	0	0	0	0	7	0	10	0	24	0	5		47			5			REMIND		REMIND
'Agricultural Demand|Livestock|Other'	1	0	0	0	5	0	7	0	10	0	24	0	5		52			6			REMIND		REMIND
'Agricultural Production'	3	0	0	0	0	0	7	0	12	0	25	0	5		52			5			REMIND		REMIND
'Agricultural Production|Energy'	3	0	0	0	0	0	7	0	10	0	19	0	5		44			5			REMIND		REMIND
'Agricultural Production|Energy|Crops'	3	0	0	0	1	0	7	0	11	0	25	0	5		52			6			REMIND		REMIND
'Agricultural Production|Energy|Residues'	0	0	0	0	0	0	7	0	0	0	19	0	0		26			2			REMIND		REMIND
'Agricultural Production|Non-Energy'	3	0	0	0	0	0	7	0	10	0	19	0	5		44			5			REMIND		REMIND
'Agricultural Production|Non-Energy|Crops'	3	0	0	0	1	0	7	0	11	0	25	0	5		52			6			REMIND		REMIND
'Agricultural Production|Non-Energy|Livestock'	3	0	0	0	1	0	7	0	11	0	25	0	5		52			6			REMIND		REMIND
'Capacity Additions|Electricity|Biomass'	3	0	0	0	0	2	7	0	7	0	33	0	5		57			6			REMIND		REMIND
'Capacity Additions|Electricity|Biomass|w/ CCS'	3	0	0	0	0	2	7	0	7	0	29	0	5		53			6			REMIND		REMIND
'Capacity Additions|Electricity|Biomass|w/o CCS'	3	0	0	0	0	2	7	0	7	0	29	0	5		53			6			REMIND		REMIND
'Capacity Additions|Electricity|Coal'	3	0	0	0	0	2	7	0	7	0	33	0	5		57			6			REMIND		REMIND
'Capacity Additions|Electricity|Coal|w/ CCS'	3	0	0	0	0	2	7	0	7	0	33	0	5		57			6			REMIND		REMIND
'Capacity Additions|Electricity|Coal|w/o CCS'	3	0	0	0	0	2	7	0	7	0	33	0	5		57			6			REMIND		REMIND
'Capacity Additions|Electricity|Fossil'	3	0	0	0	0	2	7	0	7	0	33	0	5		57			6			REMIND		REMIND
'Capacity Additions|Electricity|Gas'	3	0	0	0	0	2	7	0	7	0	33	0	5		57			6			REMIND		REMIND
'Capacity Additions|Electricity|Gas|w/ CCS'	3	0	0	0	0	2	7	0	7	0	33	0	5		57			6			REMIND		REMIND
'Capacity Additions|Electricity|Gas|w/o CCS'	3	0	0	0	0	2	7	0	7	0	33	0	5		57			6			REMIND		REMIND
'Capacity Additions|Electricity|Geothermal'	3	0	0	0	0	2	0	0	7	0	0	0	0		12			3			MESSAGE		MESSAGE
'Capacity Additions|Electricity|Hydro'	3	0	0	0	0	2	7	0	7	0	33	0	5		57			6			REMIND		REMIND
'Capacity Additions|Electricity|Non-Biomass Renewables'	3	0	0	0	0	2	7	0	7	0	33	0	5		57			6			REMIND		REMIND
'Capacity Additions|Electricity|Nuclear'	3	0	0	0	0	2	7	0	7	0	33	0	5		57			6			REMIND		REMIND
'Capacity Additions|Electricity|Oil'	3	0	0	0	0	2	7	0	7	0	0	0	5		24			5			IMAGE		IMAGE
'Capacity Additions|Electricity|Oil|w/ CCS'	3	0	0	0	0	0	7	0	7	0	0	0	0		17			3			IMAGE		IMAGE
'Capacity Additions|Electricity|Oil|w/o CCS'	3	0	0	0	0	2	7	0	7	0	0	0	5		24			5			IMAGE		IMAGE
'Capacity Additions|Electricity|Renewables (incl. Biomass)'	3	0	0	0	0	2	7	0	7	0	33	0	5		57			6			REMIND		REMIND
'Capacity Additions|Electricity|Solar'	3	0	0	0	0	2	7	0	7	0	33	0	5		57			6			REMIND		REMIND
'Capacity Additions|Electricity|Solar|CSP'	0	0	0	0	0	0	7	0	7	0	33	0	5		52			4			REMIND		REMIND
'Capacity Additions|Electricity|Solar|PV'	3	0	0	0	0	2	7	0	7	0	33	0	5		57			6			REMIND		REMIND
'Capacity Additions|Electricity|Storage Capacity'	0	0	0	0	0	0	0	0	7	0	29	0	5		41			3			REMIND		REMIND
'Capacity Additions|Electricity|Wind'	3	0	0	0	0	2	7	0	7	0	33	0	5		57			6			REMIND		REMIND
'Capacity Additions|Electricity|Wind|Offshore'	0	0	0	0	0	2	7	0	7	0	0	0	5		21			4			IMAGE		IMAGE
'Capacity Additions|Electricity|Wind|Onshore'	3	0	0	0	0	2	7	0	7	0	0	0	5		24			5			IMAGE		IMAGE
'Capacity|Electricity'	4	0	0	0	1	2	7	0	16	0	39	0	9		78			7			REMIND		REMIND
'Capacity|Electricity|Biomass'	4	0	1	0	1	2	7	0	12	1	39	0	9		76			9			REMIND		REMIND
'Capacity|Electricity|Biomass|w/ CCS'	3	0	1	0	0	2	7	0	9	0	29	0	5		56			7			REMIND		REMIND
'Capacity|Electricity|Biomass|w/o CCS'	3	0	1	0	0	2	7	0	9	0	29	0	5		56			7			REMIND		REMIND
'Capacity|Electricity|Coal'	4	0	1	0	1	2	7	0	17	1	39	0	9		81			9			REMIND		REMIND
'Capacity|Electricity|Coal|w/ CCS'	3	0	1	0	0	2	7	0	9	0	33	0	5		60			7			REMIND		REMIND
'Capacity|Electricity|Coal|w/o CCS'	3	0	1	0	0	2	7	0	9	0	33	0	5		60			7			REMIND		REMIND
'Capacity|Electricity|Fossil'	4	0	1	0	1	2	7	0	17	1	39	0	9		81			9			REMIND		REMIND
'Capacity|Electricity|Gas'	4	0	1	0	1	2	7	0	12	1	39	0	9		76			9			REMIND		REMIND
'Capacity|Electricity|Gas|w/ CCS'	3	0	1	0	0	2	7	0	9	0	33	0	5		60			7			REMIND		REMIND
'Capacity|Electricity|Gas|w/o CCS'	3	0	1	0	0	2	7	0	9	0	33	0	5		60			7			REMIND		REMIND
'Capacity|Electricity|Geothermal'	4	0	1	0	1	2	0	0	12	1	30	0	0		51			7			REMIND		REMIND
'Capacity|Electricity|Hydro'	4	0	1	0	0	2	7	0	12	1	39	0	9		75			8			REMIND		REMIND
'Capacity|Electricity|Non-Biomass Renewables'	4	0	1	0	1	2	7	0	12	1	39	0	9		76			9			REMIND		REMIND
'Capacity|Electricity|Nuclear'	4	0	1	0	1	2	7	0	12	1	39	0	9		76			9			REMIND		REMIND
'Capacity|Electricity|Ocean'	0	0	0	0	0	0	0	0	0	1	0	0	0		1			1			POLES		0
'Capacity|Electricity|Oil'	4	0	1	0	1	2	7	0	12	1	22	0	9		59			9			REMIND		REMIND
'Capacity|Electricity|Oil|w/ CCS'	3	0	0	0	0	0	7	0	9	0	0	0	0		19			3			MESSAGE		MESSAGE
'Capacity|Electricity|Oil|w/o CCS'	3	0	0	0	0	2	7	0	9	0	29	0	5		55			6			REMIND		REMIND
'Capacity|Electricity|Other'	3	0	0	0	0	0	7	0	0	1	17	0	2		30			5			REMIND		REMIND
'Capacity|Electricity|Peak Demand'	0	0	0	0	0	0	7	0	0	0	29	0	0		36			2			REMIND		REMIND
'Capacity|Electricity|Renewables (incl. Biomass)'	4	0	1	0	1	2	7	0	12	1	39	0	9		76			9			REMIND		REMIND
'Capacity|Electricity|Solar'	3	0	1	0	1	2	7	0	12	1	39	0	9		75			9			REMIND		REMIND
'Capacity|Electricity|Solar|CSP'	0	0	1	0	0	0	7	0	11	1	38	0	7		65			6			REMIND		REMIND
'Capacity|Electricity|Solar|PV'	4	0	1	0	0	2	7	0	11	1	38	0	7		71			8			REMIND		REMIND
'Capacity|Electricity|Storage'	2	0	0	0	0	0	7	0	9	0	33	0	5		56			5			REMIND		REMIND
'Capacity|Electricity|Storage Capacity'	2	0	0	0	0	0	7	0	0	0	0	0	5		14			3			IMAGE		IMAGE
'Capacity|Electricity|Wind'	4	0	1	0	1	2	7	0	12	1	39	0	9		76			9			REMIND		REMIND
'Capacity|Electricity|Wind|Offshore'	0	0	1	0	0	2	7	0	11	1	0	0	7		29			6			MESSAGE		MESSAGE
'Capacity|Electricity|Wind|Onshore'	4	0	1	0	0	2	7	0	11	1	0	0	7		33			7			MESSAGE		MESSAGE
'Capacity|Gases|Biomass'	0	0	0	0	0	0	0	0	9	0	0	0	0		9			1			MESSAGE		0
'Capacity|Gases|Biomass|w/o CCS'	0	0	0	0	0	0	0	0	9	0	0	0	0		9			1			MESSAGE		0
'Capacity|Gases|Coal'	0	0	0	0	0	0	0	0	9	0	0	0	0		9			1			MESSAGE		0
'Capacity|Gases|Coal|w/o CCS'	0	0	0	0	0	0	0	0	9	0	0	0	0		9			1			MESSAGE		0
'Capacity|Hydrogen|Biomass'	0	0	0	0	0	0	7	0	9	0	0	0	0		16			2			MESSAGE		MESSAGE
'Capacity|Hydrogen|Biomass|w/ CCS'	0	0	0	0	0	0	7	0	9	0	0	0	0		16			2			MESSAGE		MESSAGE
'Capacity|Hydrogen|Biomass|w/o CCS'	0	0	0	0	0	0	7	0	9	0	0	0	0		16			2			MESSAGE		MESSAGE
'Capacity|Hydrogen|Coal'	0	0	0	0	0	0	7	0	9	0	0	0	0		16			2			MESSAGE		MESSAGE
'Capacity|Hydrogen|Coal|w/ CCS'	0	0	0	0	0	0	7	0	9	0	0	0	0		16			2			MESSAGE		MESSAGE
'Capacity|Hydrogen|Coal|w/o CCS'	0	0	0	0	0	0	7	0	9	0	0	0	0		16			2			MESSAGE		MESSAGE
'Capacity|Hydrogen|Electricity'	0	0	0	0	0	0	7	0	9	0	0	0	5		21			3			MESSAGE		MESSAGE
'Capacity|Hydrogen|Gas'	0	0	0	0	0	0	7	0	9	0	0	0	5		21			3			MESSAGE		MESSAGE
'Capacity|Hydrogen|Gas|w/ CCS'	0	0	0	0	0	0	7	0	9	0	0	0	5		21			3			MESSAGE		MESSAGE
'Capacity|Hydrogen|Gas|w/o CCS'	0	0	0	0	0	0	7	0	9	0	0	0	5		21			3			MESSAGE		MESSAGE
'Capacity|Liquids|Biomass'	0	0	0	0	0	0	0	0	9	0	0	0	0		9			1			MESSAGE		0
'Capacity|Liquids|Biomass|w/ CCS'	3	0	0	0	0	0	0	0	9	0	0	0	0		12			2			MESSAGE		MESSAGE
'Capacity|Liquids|Biomass|w/o CCS'	3	0	0	0	0	0	0	0	9	0	0	0	0		12			2			MESSAGE		MESSAGE
'Capacity|Liquids|Coal'	0	0	0	0	0	0	0	0	9	0	0	0	0		9			1			MESSAGE		0
'Capacity|Liquids|Coal|w/ CCS'	0	0	0	0	0	0	0	0	9	0	0	0	0		9			1			MESSAGE		0
'Capacity|Liquids|Coal|w/o CCS'	0	0	0	0	0	0	0	0	9	0	0	0	0		9			1			MESSAGE		0
'Capacity|Liquids|Gas'	0	0	0	0	0	0	0	0	9	0	0	0	0		9			1			MESSAGE		0
'Capacity|Liquids|Gas|w/ CCS'	0	0	0	0	0	0	0	0	9	0	0	0	0		9			1			MESSAGE		0
'Capacity|Liquids|Gas|w/o CCS'	0	0	0	0	0	0	0	0	9	0	0	0	0		9			1			MESSAGE		0
'Capacity|Liquids|Oil'	3	0	0	0	0	0	0	0	9	0	0	0	0		12			2			MESSAGE		MESSAGE
'Capacity|Transportation|Aviation|Freight'	0	0	0	0	0	0	0	0	0	0	0	0	0		0			0			0		0
'Capacity|Transportation|Aviation|Passenger'	0	0	0	0	0	0	0	0	0	0	0	0	0		0			0			0		0
'Capacity|Transportation|Maritime|Freight'	0	0	0	0	0	0	0	0	0	0	0	0	0		0			0			0		0
'Capacity|Transportation|Maritime|Passenger'	0	0	0	0	0	0	0	0	0	0	0	0	0		0			0			0		0
'Capacity|Transportation|Rail|Freight'	0	0	0	0	0	0	0	0	0	0	0	0	0		0			0			0		0
'Capacity|Transportation|Rail|Passenger'	0	0	0	0	0	0	0	0	0	0	0	0	0		0			0			0		0
'Capacity|Transportation|Road|Freight'	0	0	0	0	0	0	0	0	0	0	0	0	0		0			0			0		0
'Capacity|Transportation|Road|Passenger'	0	0	0	0	0	0	0	0	0	0	0	0	0		0			0			0		0
'Capital Cost|Electricity|Biomass|w/ CCS'	3	0	0	0	0	2	0	0	2	0	38	0	5		50			5			REMIND		REMIND
'Capital Cost|Electricity|Biomass|w/o CCS'	3	0	0	0	0	2	0	0	2	0	38	0	5		50			5			REMIND		REMIND
'Capital Cost|Electricity|Coal|w/ CCS'	3	0	0	0	0	2	0	0	2	0	38	0	5		50			5			REMIND		REMIND
'Capital Cost|Electricity|Coal|w/o CCS'	3	0	0	0	0	2	0	0	2	0	38	0	5		50			5			REMIND		REMIND
'Capital Cost|Electricity|Gas|w/ CCS'	3	0	0	0	0	2	0	0	2	0	38	0	5		50			5			REMIND		REMIND
'Capital Cost|Electricity|Gas|w/o CCS'	3	0	0	0	0	2	0	0	2	0	38	0	5		50			5			REMIND		REMIND
'Capital Cost|Electricity|Geothermal'	3	0	0	0	0	2	0	0	9	0	38	0	0		52			4			REMIND		REMIND
'Capital Cost|Electricity|Hydro'	3	0	0	0	0	2	0	0	9	0	38	0	0		52			4			REMIND		REMIND
'Capital Cost|Electricity|Nuclear'	3	0	0	0	0	2	0	0	9	0	38	0	5		57			5			REMIND		REMIND
'Capital Cost|Electricity|Solar|CSP'	0	0	0	0	0	0	0	0	2	0	38	0	5		45			3			REMIND		REMIND
'Capital Cost|Electricity|Solar|PV'	3	0	0	0	0	2	0	0	9	0	38	0	5		57			5			REMIND		REMIND
'Capital Cost|Electricity|Wind|Offshore'	0	0	0	0	0	2	0	0	9	0	38	0	5		54			4			REMIND		REMIND
'Capital Cost|Electricity|Wind|Onshore'	3	0	0	0	0	2	0	0	9	0	9	0	5		28			5			MESSAGE		MESSAGE
'Capital Cost|Gases|Biomass|w/ CCS'	0	0	0	0	0	0	0	0	0	0	0	0	0		0			0			0		0
'Capital Cost|Gases|Biomass|w/o CCS'	0	0	0	0	0	0	0	0	9	0	38	0	0		47			2			REMIND		REMIND
'Capital Cost|Gases|Coal|w/ CCS'	0	0	0	0	0	0	0	0	0	0	0	0	0		0			0			0		0
'Capital Cost|Gases|Coal|w/o CCS'	0	0	0	0	0	0	0	0	9	0	38	0	0		47			2			REMIND		REMIND
'Capital Cost|Hydrogen|Biomass|w/ CCS'	0	0	0	0	0	0	0	0	9	0	38	0	0		47			2			REMIND		REMIND
'Capital Cost|Hydrogen|Biomass|w/o CCS'	0	0	0	0	0	0	0	0	9	0	38	0	0		47			2			REMIND		REMIND
'Capital Cost|Hydrogen|Coal|w/ CCS'	0	0	0	0	0	0	0	0	9	0	38	0	0		47			2			REMIND		REMIND
'Capital Cost|Hydrogen|Coal|w/o CCS'	0	0	0	0	0	0	0	0	9	0	38	0	0		47			2			REMIND		REMIND
'Capital Cost|Hydrogen|Electricity'	0	0	0	0	0	0	0	0	9	0	38	0	0		47			2			REMIND		REMIND
'Capital Cost|Hydrogen|Gas|w/ CCS'	0	0	0	0	0	0	0	0	9	0	38	0	0		47			2			REMIND		REMIND
'Capital Cost|Hydrogen|Gas|w/o CCS'	0	0	0	0	0	0	0	0	9	0	38	0	0		47			2			REMIND		REMIND
'Capital Cost|Liquids|Biomass|w/ CCS'	3	0	0	0	0	0	0	0	9	0	38	0	0		50			3			REMIND		REMIND
'Capital Cost|Liquids|Biomass|w/o CCS'	3	0	0	0	0	0	0	0	9	0	38	0	0		50			3			REMIND		REMIND
'Capital Cost|Liquids|Coal|w/ CCS'	0	0	0	0	0	0	0	0	9	0	38	0	0		47			2			REMIND		REMIND
'Capital Cost|Liquids|Coal|w/o CCS'	0	0	0	0	0	0	0	0	9	0	38	0	0		47			2			REMIND		REMIND
'Capital Cost|Liquids|Gas|w/ CCS'	0	0	0	0	0	0	0	0	9	0	0	0	0		9			1			MESSAGE		0
'Capital Cost|Liquids|Gas|w/o CCS'	0	0	0	0	0	0	0	0	9	0	0	0	0		9			1			MESSAGE		0
'Capital Cost|Liquids|Oil'	3	0	0	0	0	0	0	0	0	0	38	0	0		41			2			REMIND		REMIND
'Capital Formation'	0	0	0	0	0	0	0	0	0	0	25	0	0		25			1			REMIND		0
'Capital Stock'	2	0	0	0	0	0	0	0	0	0	0	0	5		7			2			WITCH		WITCH
'Carbon Intensity|Production|Cement'	0	0	0	0	0	0	0	0	0	0	2	0	0		2			1			REMIND		0
'Carbon Intensity|Production|Cement|Fossil|Energy|Demand|Industry'	0	0	0	0	0	0	0	0	0	0	0	0	0		0			0			0		0
'Carbon Intensity|Production|Cement|Industrial Processes'	0	0	0	0	0	0	0	0	0	0	6	0	0		6			1			REMIND		0
'Carbon Intensity|Production|Chemicals'	0	0	0	0	0	0	0	0	0	0	0	0	0		0			0			0		0
'Carbon Intensity|Production|Chemicals|Fossil|Energy|Demand|Industry'	0	0	0	0	0	0	0	0	0	0	0	0	0		0			0			0		0
'Carbon Intensity|Production|Chemicals|Industrial Processes'	0	0	0	0	0	0	0	0	0	0	0	0	0		0			0			0		0
'Carbon Intensity|Production|Steel'	0	0	0	0	0	0	0	0	0	0	6	0	0		6			1			REMIND		0
'Carbon Intensity|Production|Steel|Fossil|Energy|Demand|Industry'	0	0	0	0	0	0	0	0	0	0	4	0	0		4			1			REMIND		0
'Carbon Intensity|Production|Steel|Industrial Processes'	0	0	0	0	0	0	0	0	0	0	0	0	0		0			0			0		0
'Carbon Sequestration|CCS'	4	0	1	0	6	2	7	0	20	4	41	0	9		94			9			REMIND		REMIND
'Carbon Sequestration|CCS|Biomass'	4	3	1	0	6	0	7	0	20	4	41	0	9		95			9			REMIND		REMIND
'Carbon Sequestration|CCS|Biomass|Energy'	1	0	0	0	1	0	7	0	0	0	17	0	0		26			4			REMIND		REMIND
'Carbon Sequestration|CCS|Biomass|Energy|Demand|Industry'	0	0	0	0	0	0	7	0	0	1	39	0	0		47			3			REMIND		REMIND
'Carbon Sequestration|CCS|Biomass|Energy|Supply'	3	0	1	0	1	0	7	0	10	1	39	0	5		67			8			REMIND		REMIND
'Carbon Sequestration|CCS|Biomass|Energy|Supply|Electricity'	3	0	1	0	1	0	7	0	10	1	39	0	5		67			8			REMIND		REMIND
'Carbon Sequestration|CCS|Biomass|Energy|Supply|Gases'	0	0	1	0	0	0	0	0	0	1	35	0	0		37			3			REMIND		REMIND
'Carbon Sequestration|CCS|Biomass|Energy|Supply|Hydrogen'	0	0	0	0	0	0	7	0	10	1	39	0	0		57			4			REMIND		REMIND
'Carbon Sequestration|CCS|Biomass|Energy|Supply|Liquids'	3	0	1	0	0	0	7	0	10	1	39	0	0		61			6			REMIND		REMIND
'Carbon Sequestration|CCS|Biomass|Energy|Supply|Other'	0	0	0	0	0	0	7	0	0	1	25	0	0		33			3			REMIND		REMIND
'Carbon Sequestration|CCS|Biomass|Industrial Processes'	0	0	0	0	0	0	7	0	0	0	0	0	0		7			1			IMAGE		0
'Carbon Sequestration|CCS|Fossil'	4	0	1	0	6	2	7	0	19	4	29	0	9		81			9			REMIND		REMIND
'Carbon Sequestration|CCS|Fossil|Energy'	1	0	0	0	1	0	7	0	0	0	0	0	0		9			3			IMAGE		IMAGE
'Carbon Sequestration|CCS|Fossil|Energy|Demand|Industry'	3	0	0	0	1	0	7	0	0	1	39	0	5		56			6			REMIND		REMIND
'Carbon Sequestration|CCS|Fossil|Energy|Supply'	3	0	1	0	1	2	7	0	10	1	38	0	5		68			9			REMIND		REMIND
'Carbon Sequestration|CCS|Fossil|Energy|Supply|Electricity'	3	0	1	0	1	2	7	0	10	1	0	0	5		30			8			MESSAGE		MESSAGE
'Carbon Sequestration|CCS|Fossil|Energy|Supply|Gases'	0	0	1	0	0	0	0	0	0	1	0	0	5		7			3			WITCH		WITCH
'Carbon Sequestration|CCS|Fossil|Energy|Supply|Hydrogen'	0	0	0	0	0	0	7	0	10	1	0	0	0		18			3			MESSAGE		MESSAGE
'Carbon Sequestration|CCS|Fossil|Energy|Supply|Liquids'	3	0	1	0	0	0	0	0	10	1	0	0	0		15			4			MESSAGE		MESSAGE
'Carbon Sequestration|CCS|Fossil|Energy|Supply|Other'	0	0	0	0	0	0	7	0	0	1	0	0	0		8			2			IMAGE		IMAGE
'Carbon Sequestration|CCS|Fossil|Industrial Processes'	1	0	0	0	1	0	0	0	0	0	0	0	0		2			2			AIM		AIM
'Carbon Sequestration|CCS|Industrial Processes'	3	0	0	0	5	0	7	0	14	0	29	0	0		58			5			REMIND		REMIND
'Carbon Sequestration|Direct Air Capture'	0	3	1	0	0	0	0	0	0	0	29	0	5		38			4			REMIND		REMIND
'Carbon Sequestration|Enhanced Weathering'	0	3	0	0	0	0	0	0	0	0	29	0	0		32			2			REMIND		REMIND
'Carbon Sequestration|Feedstocks'	0	0	0	0	0	0	7	0	0	0	0	0	0		7			1			IMAGE		0
'Carbon Sequestration|Land Use'	0	3	1	0	0	0	7	0	17	1	28	0	7		64			7			REMIND		REMIND
'Carbon Sequestration|Land Use|Afforestation'	2	3	0	0	0	0	7	0	10	0	28	0	5		55			6			REMIND		REMIND
'Carbon Sequestration|Land Use|Biochar'	0	3	0	0	0	0	0	0	0	0	0	0	0		3			1			C-ROADS		0
'Carbon Sequestration|Land Use|Other'	0	0	0	0	0	0	0	0	0	0	0	0	0		0			0			0		0
'Carbon Sequestration|Land Use|Soil Carbon Management'	0	3	0	0	0	0	0	0	0	0	0	0	0		3			1			C-ROADS		0
'Carbon Sequestration|Other'	0	0	1	0	0	2	7	0	0	0	0	0	0		10			3			IMAGE		IMAGE
'Carbon Utilization|CCS|Industry'	0	0	0	0	0	0	0	0	0	0	17	0	0		17			1			REMIND		0
'Concentration|CH4'	2	3	0	0	0	0	7	0	2	0	36	0	0		50			5			REMIND		REMIND
'Concentration|CO2'	2	3	0	0	5	0	7	0	2	0	36	0	0		55			6			REMIND		REMIND
'Concentration|N2O'	2	3	0	0	0	0	7	0	2	0	36	0	0		50			5			REMIND		REMIND
'Consumption'	4	0	0	0	0	2	7	0	19	0	41	0	9		82			6			REMIND		REMIND
'Cumulative Capacity|Electricity|Biomass'	0	0	0	0	0	2	7	0	7	0	34	0	5		55			5			REMIND		REMIND
'Cumulative Capacity|Electricity|Biomass|w/ CCS'	3	0	1	0	0	2	7	0	7	0	34	0	5		59			7			REMIND		REMIND
'Cumulative Capacity|Electricity|Biomass|w/o CCS'	3	0	1	0	0	2	7	0	7	0	34	0	5		59			7			REMIND		REMIND
'Cumulative Capacity|Electricity|Coal'	0	0	0	0	0	2	7	0	7	0	34	0	5		55			5			REMIND		REMIND
'Cumulative Capacity|Electricity|Coal|w/ CCS'	3	0	1	0	0	2	7	0	7	0	34	0	5		59			7			REMIND		REMIND
'Cumulative Capacity|Electricity|Coal|w/o CCS'	3	0	1	0	0	2	7	0	7	0	34	0	5		59			7			REMIND		REMIND
'Cumulative Capacity|Electricity|Fossil'	0	0	0	0	0	2	7	0	7	0	34	0	5		55			5			REMIND		REMIND
'Cumulative Capacity|Electricity|Gas'	0	0	0	0	0	2	7	0	7	0	34	0	5		55			5			REMIND		REMIND
'Cumulative Capacity|Electricity|Gas|w/ CCS'	3	0	1	0	0	2	7	0	7	0	34	0	5		59			7			REMIND		REMIND
'Cumulative Capacity|Electricity|Gas|w/o CCS'	3	0	1	0	0	2	7	0	7	0	34	0	5		59			7			REMIND		REMIND
'Cumulative Capacity|Electricity|Geothermal'	3	0	1	0	0	2	0	0	7	0	0	0	0		13			4			MESSAGE		MESSAGE
'Cumulative Capacity|Electricity|Hydro'	3	0	1	0	0	2	7	0	7	0	34	0	5		59			7			REMIND		REMIND
'Cumulative Capacity|Electricity|Non-Biomass Renewables'	3	0	1	0	0	2	7	0	7	0	34	0	5		59			7			REMIND		REMIND
'Cumulative Capacity|Electricity|Nuclear'	3	0	1	0	0	2	7	0	7	0	34	0	5		59			7			REMIND		REMIND
'Cumulative Capacity|Electricity|Ocean'	0	0	0	0	0	0	0	0	0	0	0	0	0		0			0			0		0
'Cumulative Capacity|Electricity|Oil'	0	0	0	0	0	2	7	0	7	0	0	0	5		21			4			IMAGE		IMAGE
'Cumulative Capacity|Electricity|Oil|w/ CCS'	3	0	1	0	0	0	7	0	7	0	0	0	0		18			4			IMAGE		IMAGE
'Cumulative Capacity|Electricity|Oil|w/o CCS'	3	0	1	0	0	2	7	0	7	0	0	0	5		25			6			IMAGE		IMAGE
'Cumulative Capacity|Electricity|Other'	1	0	0	0	0	0	7	0	0	0	0	0	0		8			2			IMAGE		IMAGE
'Cumulative Capacity|Electricity|Renewables (incl. Biomass)'	3	0	1	0	0	2	7	0	7	0	34	0	5		59			7			REMIND		REMIND
'Cumulative Capacity|Electricity|Solar'	0	0	0	0	0	2	7	0	7	0	25	0	5		46			5			REMIND		REMIND
'Cumulative Capacity|Electricity|Solar|CSP'	0	0	1	0	0	0	7	0	7	0	34	0	5		54			5			REMIND		REMIND
'Cumulative Capacity|Electricity|Solar|PV'	3	0	1	0	0	2	7	0	7	0	34	0	5		59			7			REMIND		REMIND
'Cumulative Capacity|Electricity|Wind'	0	0	0	0	0	2	7	0	7	0	34	0	5		55			5			REMIND		REMIND
'Cumulative Capacity|Electricity|Wind|Offshore'	0	0	1	0	0	2	7	0	7	0	0	0	5		22			5			IMAGE		IMAGE
'Cumulative Capacity|Electricity|Wind|Onshore'	3	0	1	0	0	2	7	0	7	0	0	0	5		25			6			IMAGE		IMAGE
'Cumulative Capacity|Gases|Biomass'	0	0	0	0	0	0	0	0	7	0	0	0	0		7			1			MESSAGE		0
'Cumulative Capacity|Gases|Biomass|w/o CCS'	0	0	0	0	0	0	0	0	7	0	0	0	0		7			1			MESSAGE		0
'Cumulative Capacity|Gases|Coal'	0	0	0	0	0	0	0	0	7	0	0	0	0		7			1			MESSAGE		0
'Cumulative Capacity|Gases|Coal|w/o CCS'	0	0	0	0	0	0	0	0	7	0	0	0	0		7			1			MESSAGE		0
'Cumulative Capacity|Hydrogen|Biomass'	0	0	0	0	0	0	0	0	7	0	25	0	0		32			2			REMIND		REMIND
'Cumulative Capacity|Hydrogen|Biomass|w/ CCS'	0	0	0	0	0	0	0	0	7	0	25	0	0		32			2			REMIND		REMIND
'Cumulative Capacity|Hydrogen|Biomass|w/o CCS'	0	0	0	0	0	0	0	0	7	0	25	0	0		32			2			REMIND		REMIND
'Cumulative Capacity|Hydrogen|Coal'	0	0	0	0	0	0	0	0	7	0	0	0	0		7			1			MESSAGE		0
'Cumulative Capacity|Hydrogen|Coal|w/ CCS'	0	0	0	0	0	0	0	0	7	0	0	0	0		7			1			MESSAGE		0
'Cumulative Capacity|Hydrogen|Coal|w/o CCS'	0	0	0	0	0	0	0	0	7	0	0	0	0		7			1			MESSAGE		0
'Cumulative Capacity|Hydrogen|Electricity'	0	0	0	0	0	0	0	0	7	0	25	0	5		37			3			REMIND		REMIND
'Cumulative Capacity|Hydrogen|Gas'	0	0	0	0	0	0	0	0	7	0	0	0	5		12			2			MESSAGE		MESSAGE
'Cumulative Capacity|Hydrogen|Gas|w/ CCS'	0	0	0	0	0	0	0	0	7	0	0	0	5		12			2			MESSAGE		MESSAGE
'Cumulative Capacity|Hydrogen|Gas|w/o CCS'	0	0	0	0	0	0	0	0	7	0	0	0	5		12			2			MESSAGE		MESSAGE
'Cumulative Capacity|Liquids|Biomass'	0	0	0	0	0	0	0	0	7	0	0	0	0		7			1			MESSAGE		0
'Cumulative Capacity|Liquids|Biomass|w/ CCS'	0	0	0	0	0	0	0	0	7	0	0	0	0		7			1			MESSAGE		0
'Cumulative Capacity|Liquids|Biomass|w/o CCS'	0	0	0	0	0	0	0	0	7	0	0	0	0		7			1			MESSAGE		0
'Cumulative Capacity|Liquids|Coal'	0	0	0	0	0	0	0	0	7	0	0	0	0		7			1			MESSAGE		0
'Cumulative Capacity|Liquids|Coal|w/ CCS'	0	0	0	0	0	0	0	0	7	0	0	0	0		7			1			MESSAGE		0
'Cumulative Capacity|Liquids|Coal|w/o CCS'	0	0	0	0	0	0	0	0	7	0	0	0	0		7			1			MESSAGE		0
'Cumulative Capacity|Liquids|Gas'	0	0	0	0	0	0	0	0	7	0	0	0	0		7			1			MESSAGE		0
'Cumulative Capacity|Liquids|Gas|w/ CCS'	0	0	0	0	0	0	0	0	7	0	0	0	0		7			1			MESSAGE		0
'Cumulative Capacity|Liquids|Gas|w/o CCS'	0	0	0	0	0	0	0	0	7	0	0	0	0		7			1			MESSAGE		0
'Cumulative Capacity|Liquids|Oil'	0	0	0	0	0	0	0	0	7	0	0	0	0		7			1			MESSAGE		0
'Discount rate|Economy'	0	0	0	0	0	0	0	0	0	0	0	0	0		0			0			0		0
'Discount rate|Electricity'	0	0	0	0	0	0	0	0	0	0	0	0	0		0			0			0		0
'Discount rate|Energy Supply'	0	0	0	0	0	0	0	0	0	0	0	0	0		0			0			0		0
'Discount rate|Industry'	0	0	0	0	0	0	0	0	0	0	0	0	0		0			0			0		0
'Discount rate|Mobility'	0	0	0	0	0	0	0	0	0	0	0	0	0		0			0			0		0
'Discount rate|Residential and Commercial'	0	0	0	0	0	0	0	0	0	0	0	0	0		0			0			0		0
'Discount rate|Social'	0	0	0	0	0	0	0	0	0	0	0	0	0		0			0			0		0
'Discount rate|Transport Infrastructure'	0	0	0	0	0	0	0	0	0	0	0	0	0		0			0			0		0
'Ecotoxicity|Freshwater|Electricity'	1	0	0	0	0	0	0	0	1	0	1	0	0		3			3			AIM		AIM
'Ecotoxicity|Marine|Electricity'	1	0	0	0	0	0	0	0	1	0	1	0	0		3			3			AIM		AIM
'Efficiency|Electricity|Biomass|w/ CCS'	3	0	0	0	0	0	0	0	0	0	29	0	5		37			3			REMIND		REMIND
'Efficiency|Electricity|Biomass|w/o CCS'	3	0	0	0	0	0	0	0	0	0	29	0	5		37			3			REMIND		REMIND
'Efficiency|Electricity|Coal|w/ CCS'	3	0	0	0	0	0	0	0	0	0	29	0	5		37			3			REMIND		REMIND
'Efficiency|Electricity|Coal|w/o CCS'	3	0	0	0	0	0	0	0	0	0	29	0	5		37			3			REMIND		REMIND
'Efficiency|Electricity|Gas|w/ CCS'	3	0	0	0	0	0	0	0	0	0	29	0	5		37			3			REMIND		REMIND
'Efficiency|Electricity|Gas|w/o CCS'	3	0	0	0	0	0	0	0	0	0	29	0	5		37			3			REMIND		REMIND
'Efficiency|Gases|Biomass|w/o CCS'	0	0	0	0	0	0	0	0	7	0	29	0	0		36			2			REMIND		REMIND
'Efficiency|Gases|Coal|w/o CCS'	0	0	0	0	0	0	0	0	7	0	29	0	0		36			2			REMIND		REMIND
'Efficiency|Hydrogen|Biomass|w/ CCS'	0	0	0	0	0	0	0	0	7	0	29	0	0		36			2			REMIND		REMIND
'Efficiency|Hydrogen|Biomass|w/o CCS'	0	0	0	0	0	0	0	0	7	0	29	0	0		36			2			REMIND		REMIND
'Efficiency|Hydrogen|Coal|w/ CCS'	0	0	0	0	0	0	0	0	7	0	29	0	0		36			2			REMIND		REMIND
'Efficiency|Hydrogen|Coal|w/o CCS'	0	0	0	0	0	0	0	0	7	0	29	0	0		36			2			REMIND		REMIND
'Efficiency|Hydrogen|Electricity'	0	0	0	0	0	0	7	0	7	0	29	0	0		43			3			REMIND		REMIND
'Efficiency|Hydrogen|Gas|w/ CCS'	0	0	0	0	0	0	0	0	7	0	29	0	0		36			2			REMIND		REMIND
'Efficiency|Hydrogen|Gas|w/o CCS'	0	0	0	0	0	0	0	0	7	0	29	0	0		36			2			REMIND		REMIND
'Efficiency|Liquids|Biomass|w/ CCS'	3	0	0	0	0	0	0	0	7	0	29	0	0		39			3			REMIND		REMIND
'Efficiency|Liquids|Biomass|w/o CCS'	3	0	0	0	0	0	0	0	7	0	29	0	0		39			3			REMIND		REMIND
'Efficiency|Liquids|Coal|w/ CCS'	0	0	0	0	0	0	0	0	7	0	29	0	0		36			2			REMIND		REMIND
'Efficiency|Liquids|Coal|w/o CCS'	0	0	0	0	0	0	0	0	7	0	29	0	0		36			2			REMIND		REMIND
'Efficiency|Liquids|Gas|w/ CCS'	0	0	0	0	0	0	0	0	7	0	0	0	0		7			1			MESSAGE		0
'Efficiency|Liquids|Gas|w/o CCS'	0	0	0	0	0	0	0	0	7	0	0	0	0		7			1			MESSAGE		0
'Efficiency|Liquids|Oil'	0	0	0	0	0	0	0	0	0	0	29	0	0		29			1			REMIND		0
'Emissions|BC'	4	3	0	0	1	0	7	0	20	3	40	0	9		87			8			REMIND		REMIND
'Emissions|BC|AFOLU'	3	0	0	0	0	0	7	0	9	0	38	0	5		62			5			REMIND		REMIND
'Emissions|BC|AFOLU|Agriculture'	0	0	0	0	0	0	0	0	0	0	0	0	0		0			0			0		0
'Emissions|BC|AFOLU|Land'	1	0	0	0	0	0	0	0	0	0	0	0	0		1			1			AIM		0
'Emissions|BC|Energy'	3	0	0	0	0	0	7	0	9	0	38	0	5		62			5			REMIND		REMIND
'Emissions|BC|Energy|Demand|Industry'	3	0	0	0	0	0	7	0	9	0	38	0	5		62			5			REMIND		REMIND
'Emissions|BC|Energy|Demand|Residential and Commercial'	1	0	0	0	0	0	7	0	9	0	38	0	5		60			5			REMIND		REMIND
'Emissions|BC|Energy|Demand|Residential and Commercial|Commercial'	0	0	0	0	0	0	7	0	0	0	0	0	0		7			1			IMAGE		0
'Emissions|BC|Energy|Demand|Residential and Commercial|Residential'	0	0	0	0	0	0	7	0	0	0	0	0	0		7			1			IMAGE		0
'Emissions|BC|Energy|Demand|Transportation'	3	0	0	0	0	0	7	0	9	0	38	0	5		62			5			REMIND		REMIND
'Emissions|BC|Energy|Supply'	3	0	0	0	0	0	7	0	9	0	38	0	5		62			5			REMIND		REMIND
'Emissions|BC|Industrial Processes'	1	0	0	0	0	0	0	0	0	0	0	0	0		1			1			AIM		0
'Emissions|BC|Other'	0	0	0	0	0	0	0	0	0	0	34	0	5		39			2			REMIND		REMIND
'Emissions|BC|Waste'	1	0	0	0	0	0	0	0	0	0	17	0	0		18			2			REMIND		REMIND
'Emissions|C2F6'	1	0	0	0	5	0	7	0	1	0	0	0	0		14			4			IMAGE		IMAGE
'Emissions|CF4'	1	0	0	0	0	0	7	0	3	0	0	0	0		11			3			IMAGE		IMAGE
'Emissions|CH4'	4	3	1	0	6	2	7	0	20	4	41	0	9		97			10			REMIND		REMIND
'Emissions|CH4|AFOLU'	4	0	1	0	6	0	7	0	13	1	40	0	9		81			8			REMIND		REMIND
'Emissions|CH4|AFOLU|Agriculture'	3	0	0	0	0	0	7	0	7	0	25	0	5		47			5			REMIND		REMIND
'Emissions|CH4|AFOLU|Agriculture|Livestock'	3	0	0	0	0	0	7	0	7	0	25	0	0		42			4			REMIND		REMIND
'Emissions|CH4|AFOLU|Agriculture|Livestock|Enteric Fermentation'	1	0	0	0	0	0	7	0	7	0	25	0	0		40			4			REMIND		REMIND
'Emissions|CH4|AFOLU|Agriculture|Livestock|Manure Management'	3	0	0	0	0	0	7	0	7	0	25	0	0		42			4			REMIND		REMIND
'Emissions|CH4|AFOLU|Agriculture|Rice'	1	0	0	0	0	0	7	0	7	0	25	0	0		40			4			REMIND		REMIND
'Emissions|CH4|AFOLU|Land'	1	0	0	0	0	0	7	0	0	0	0	0	0		8			2			IMAGE		IMAGE
'Emissions|CH4|Energy'	4	0	1	0	6	0	7	0	11	0	39	0	7		75			7			REMIND		REMIND
'Emissions|CH4|Energy|Demand|Industry'	3	0	0	0	0	0	7	0	10	0	0	0	0		20			3			MESSAGE		MESSAGE
'Emissions|CH4|Energy|Demand|Residential and Commercial'	1	0	0	0	0	0	7	0	9	1	9	0	0		27			5			MESSAGE		MESSAGE
'Emissions|CH4|Energy|Demand|Residential and Commercial|Commercial'	0	0	0	0	0	0	7	0	0	0	0	0	0		7			1			IMAGE		0
'Emissions|CH4|Energy|Demand|Residential and Commercial|Residential'	0	0	0	0	0	0	7	0	0	0	0	0	0		7			1			IMAGE		0
'Emissions|CH4|Energy|Demand|Transportation'	3	0	0	0	0	0	7	0	10	0	0	0	0		20			3			MESSAGE		MESSAGE
'Emissions|CH4|Energy|Supply'	3	0	0	0	0	0	7	0	10	1	39	0	5		65			6			REMIND		REMIND
'Emissions|CH4|Industrial Processes'	1	0	0	0	0	0	7	0	0	0	0	0	0		8			2			IMAGE		IMAGE
'Emissions|CH4|Industrial Processes|Chemicals'	0	0	0	0	0	0	7	0	0	0	0	0	0		7			1			IMAGE		0
'Emissions|CH4|Industrial Processes|Steel'	0	0	0	0	0	0	7	0	0	0	0	0	0		7			1			IMAGE		0
'Emissions|CH4|Other'	0	0	1	0	0	0	7	0	0	0	38	0	5		51			4			REMIND		REMIND
'Emissions|CH4|Waste'	1	0	0	0	0	0	7	0	1	0	17	0	0		26			4			REMIND		REMIND
'Emissions|CO'	3	3	0	0	6	0	7	0	19	3	40	0	7		88			8			REMIND		REMIND
'Emissions|CO2'	4	3	1	0	6	2	7	0	20	4	41	0	9		97			10			REMIND		REMIND
'Emissions|CO2|AFOLU'	4	3	1	0	6	2	7	0	20	4	41	0	9		97			10			REMIND		REMIND
'Emissions|CO2|AFOLU|Agriculture'	0	0	0	0	0	0	0	0	0	0	0	0	0		0			0			0		0
'Emissions|CO2|AFOLU|Land'	1	0	0	0	0	0	7	0	0	0	0	0	0		8			2			IMAGE		IMAGE
'Emissions|CO2|Energy'	4	0	1	0	5	2	7	0	15	0	38	0	5		77			8			REMIND		REMIND
'Emissions|CO2|Energy and Industrial Processes'	4	3	1	0	6	2	7	0	15	4	41	0	9		92			10			REMIND		REMIND
'Emissions|CO2|Energy|Demand'	4	0	1	0	6	2	7	0	19	4	41	0	5		89			9			REMIND		REMIND
'Emissions|CO2|Energy|Demand|AFOFI'	3	0	0	0	0	2	0	0	10	1	0	0	5		21			5			MESSAGE		MESSAGE
'Emissions|CO2|Energy|Demand|Industry'	4	0	1	0	6	2	7	0	19	4	39	0	7		89			9			REMIND		REMIND
'Emissions|CO2|Energy|Demand|Industry|Cement'	0	0	0	0	0	0	0	0	0	0	0	0	0		0			0			0		0
'Emissions|CO2|Energy|Demand|Industry|Chemicals'	0	0	0	0	0	0	1	0	0	0	0	0	0		1			1			IMAGE		0
'Emissions|CO2|Energy|Demand|Industry|Chemicals|Ammonia'	0	0	0	0	0	0	0	0	0	0	0	0	0		0			0			0		0
'Emissions|CO2|Energy|Demand|Industry|Chemicals|High value chemicals'	0	0	0	0	0	0	0	0	0	0	0	0	0		0			0			0		0
'Emissions|CO2|Energy|Demand|Industry|Chemicals|Methanol'	0	0	0	0	0	0	0	0	0	0	0	0	0		0			0			0		0
'Emissions|CO2|Energy|Demand|Industry|Chemicals|Other'	0	0	0	0	0	0	0	0	0	0	0	0	0		0			0			0		0
'Emissions|CO2|Energy|Demand|Industry|Non-ferrous metals'	0	0	0	0	0	0	0	0	0	0	0	0	0		0			0			0		0
'Emissions|CO2|Energy|Demand|Industry|Other'	0	0	0	0	0	0	0	0	0	0	0	0	0		0			0			0		0
'Emissions|CO2|Energy|Demand|Industry|Pulp and Paper'	0	0	0	0	0	0	7	0	0	0	0	0	0		7			1			IMAGE		0
'Emissions|CO2|Energy|Demand|Industry|Steel'	0	0	0	0	0	0	7	0	0	0	0	0	0		7			1			IMAGE		0
'Emissions|CO2|Energy|Demand|Other Sector'	0	0	0	0	0	0	7	0	7	0	0	0	5		19			3			IMAGE		IMAGE
'Emissions|CO2|Energy|Demand|Residential and Commercial'	2	0	0	0	5	2	7	0	15	1	39	0	7		78			8			REMIND		REMIND
'Emissions|CO2|Energy|Demand|Residential and Commercial|Commercial'	2	0	1	0	5	2	7	0	0	0	0	0	5		22			6			IMAGE		IMAGE
'Emissions|CO2|Energy|Demand|Residential and Commercial|Commercial|Heating'	0	0	0	0	0	0	0	0	0	0	0	0	0		0			0			0		0
'Emissions|CO2|Energy|Demand|Residential and Commercial|Commercial|Heating|Cooking'	0	0	0	0	0	0	0	0	0	0	0	0	0		0			0			0		0
'Emissions|CO2|Energy|Demand|Residential and Commercial|Commercial|Heating|Space'	0	0	0	0	0	0	0	0	0	0	0	0	0		0			0			0		0
'Emissions|CO2|Energy|Demand|Residential and Commercial|Commercial|Heating|Water'	0	0	0	0	0	0	0	0	0	0	0	0	0		0			0			0		0
'Emissions|CO2|Energy|Demand|Residential and Commercial|Residential'	2	0	1	0	5	2	7	0	0	0	0	0	5		22			6			IMAGE		IMAGE
'Emissions|CO2|Energy|Demand|Residential and Commercial|Residential|Heating'	0	0	0	0	0	0	0	0	0	0	0	0	0		0			0			0		0
'Emissions|CO2|Energy|Demand|Residential and Commercial|Residential|Heating|Cooking'	0	0	0	0	0	0	0	0	0	0	0	0	0		0			0			0		0
'Emissions|CO2|Energy|Demand|Residential and Commercial|Residential|Heating|Space'	0	0	0	0	0	0	0	0	0	0	0	0	0		0			0			0		0
'Emissions|CO2|Energy|Demand|Residential and Commercial|Residential|Heating|Water'	0	0	0	0	0	0	0	0	0	0	0	0	0		0			0			0		0
'Emissions|CO2|Energy|Demand|Transportation'	3	0	1	0	5	2	7	0	17	4	40	0	5		84			9			REMIND		REMIND
'Emissions|CO2|Energy|Demand|Transportation|Aviation'	1	0	0	0	0	0	7	0	2	0	0	0	0		10			3			IMAGE		IMAGE
'Emissions|CO2|Energy|Demand|Transportation|Aviation|Freight'	0	0	0	0	0	0	7	0	0	0	0	0	0		7			1			IMAGE		0
'Emissions|CO2|Energy|Demand|Transportation|Aviation|Passenger'	0	0	0	0	0	0	7	0	0	0	0	0	0		7			1			IMAGE		0
'Emissions|CO2|Energy|Demand|Transportation|Freight'	0	0	0	0	0	0	0	0	0	0	2	0	5		7			2			WITCH		WITCH
'Emissions|CO2|Energy|Demand|Transportation|Maritime'	0	0	0	0	0	0	7	0	0	0	0	0	0		7			1			IMAGE		0
'Emissions|CO2|Energy|Demand|Transportation|Maritime|Freight'	0	0	0	0	0	0	0	0	0	0	0	0	0		0			0			0		0
'Emissions|CO2|Energy|Demand|Transportation|Maritime|Passenger'	0	0	0	0	0	0	0	0	0	0	0	0	0		0			0			0		0
'Emissions|CO2|Energy|Demand|Transportation|Passenger'	0	0	0	0	0	0	0	0	0	0	2	0	5		7			2			WITCH		WITCH
'Emissions|CO2|Energy|Demand|Transportation|Rail'	1	0	0	0	0	0	7	0	0	0	0	0	0		8			2			IMAGE		IMAGE
'Emissions|CO2|Energy|Demand|Transportation|Rail|Freight'	0	0	0	0	0	0	7	0	0	0	0	0	0		7			1			IMAGE		0
'Emissions|CO2|Energy|Demand|Transportation|Rail|Passenger'	0	0	0	0	0	0	7	0	0	0	0	0	0		7			1			IMAGE		0
'Emissions|CO2|Energy|Demand|Transportation|Road'	1	0	0	0	0	0	7	0	0	0	0	0	0		8			2			IMAGE		IMAGE
'Emissions|CO2|Energy|Demand|Transportation|Road|Freight'	0	0	0	0	0	0	7	0	0	0	0	0	0		7			1			IMAGE		0
'Emissions|CO2|Energy|Demand|Transportation|Road|Passenger'	0	0	0	0	0	0	7	0	0	0	0	0	0		7			1			IMAGE		0
'Emissions|CO2|Energy|Demand|Transportation|Road|Passenger|2W&3W'	0	0	0	0	0	0	0	0	0	0	0	0	0		0			0			0		0
'Emissions|CO2|Energy|Demand|Transportation|Road|Passenger|Bus'	0	0	0	0	0	0	0	0	0	0	0	0	0		0			0			0		0
'Emissions|CO2|Energy|Demand|Transportation|Road|Passenger|LDV'	0	0	0	0	0	0	7	0	0	0	15	0	0		22			2			REMIND		REMIND
'Emissions|CO2|Energy|Supply'	4	0	1	0	6	2	7	0	14	4	41	0	9		88			9			REMIND		REMIND
'Emissions|CO2|Energy|Supply|Electricity'	4	0	1	0	6	2	7	0	14	4	41	0	9		88			9			REMIND		REMIND
'Emissions|CO2|Energy|Supply|Gases'	0	0	1	0	5	2	7	0	8	1	34	0	0		58			7			REMIND		REMIND
'Emissions|CO2|Energy|Supply|Heat'	0	0	0	0	5	0	7	0	10	0	39	0	0		61			4			REMIND		REMIND
'Emissions|CO2|Energy|Supply|Liquids'	0	0	1	0	5	2	7	0	8	1	36	0	0		60			7			REMIND		REMIND
'Emissions|CO2|Energy|Supply|Other Sector'	0	0	0	0	5	0	0	0	0	0	17	0	0		22			2			REMIND		REMIND
'Emissions|CO2|Energy|Supply|Solids'	0	0	0	0	5	2	7	0	8	1	34	0	0		57			6			REMIND		REMIND
'Emissions|CO2|Industrial Processes'	3	0	1	0	5	2	7	0	15	0	38	0	5		76			8			REMIND		REMIND
'Emissions|CO2|Industrial Processes|Cement'	0	0	0	0	0	0	7	0	0	0	2	0	0		9			2			IMAGE		IMAGE
'Emissions|CO2|Industrial Processes|Chemicals'	0	0	0	0	0	0	0	0	0	0	0	0	0		0			0			0		0
'Emissions|CO2|Industrial Processes|Chemicals|Ammonia'	0	0	0	0	0	0	0	0	0	0	0	0	0		0			0			0		0
'Emissions|CO2|Industrial Processes|Chemicals|High value chemicals'	0	0	0	0	0	0	0	0	0	0	0	0	0		0			0			0		0
'Emissions|CO2|Industrial Processes|Chemicals|Methanol'	0	0	0	0	0	0	0	0	0	0	0	0	0		0			0			0		0
'Emissions|CO2|Industrial Processes|Chemicals|Other'	0	0	0	0	0	0	0	0	0	0	0	0	0		0			0			0		0
'Emissions|CO2|Industrial Processes|Non-ferrous metals'	0	0	0	0	0	0	0	0	0	0	0	0	0		0			0			0		0
'Emissions|CO2|Industrial Processes|Other'	0	0	0	0	0	0	0	0	0	0	0	0	0		0			0			0		0
'Emissions|CO2|Industrial Processes|Pulp and Paper'	0	0	0	0	0	0	7	0	0	0	0	0	0		7			1			IMAGE		0
'Emissions|CO2|Industrial Processes|Steel'	0	0	0	0	0	0	7	0	0	0	0	0	0		7			1			IMAGE		0
'Emissions|CO2|Other'	0	3	0	0	0	0	0	0	2	0	30	0	0		35			3			REMIND		REMIND
'Emissions|CO2|Waste'	1	0	0	0	0	0	0	0	1	0	0	0	0		2			2			AIM		AIM
'Emissions|CO|AFOLU'	3	0	0	0	0	0	7	0	9	0	38	0	5		62			5			REMIND		REMIND
'Emissions|CO|AFOLU|Agriculture'	0	0	0	0	0	0	0	0	0	0	0	0	0		0			0			0		0
'Emissions|CO|AFOLU|Land'	1	0	0	0	0	0	0	0	0	0	0	0	0		1			1			AIM		0
'Emissions|CO|Energy'	3	0	0	0	0	0	7	0	9	0	38	0	5		62			5			REMIND		REMIND
'Emissions|CO|Energy|Demand|Industry'	3	0	0	0	0	0	7	0	9	0	38	0	5		62			5			REMIND		REMIND
'Emissions|CO|Energy|Demand|Residential and Commercial'	1	0	0	0	0	0	7	0	9	0	38	0	5		60			5			REMIND		REMIND
'Emissions|CO|Energy|Demand|Residential and Commercial|Commercial'	0	0	0	0	0	0	7	0	0	0	0	0	0		7			1			IMAGE		0
'Emissions|CO|Energy|Demand|Residential and Commercial|Residential'	0	0	0	0	0	0	7	0	0	0	0	0	0		7			1			IMAGE		0
'Emissions|CO|Energy|Demand|Transportation'	3	0	0	0	0	0	7	0	9	0	38	0	5		62			5			REMIND		REMIND
'Emissions|CO|Energy|Supply'	3	0	0	0	0	0	7	0	9	0	38	0	5		62			5			REMIND		REMIND
'Emissions|CO|Industrial Processes'	1	0	0	0	0	0	7	0	0	0	0	0	0		8			2			IMAGE		IMAGE
'Emissions|CO|Other'	0	0	0	0	0	0	0	0	0	0	19	0	5		24			2			REMIND		REMIND
'Emissions|CO|Waste'	1	0	0	0	0	0	0	0	0	0	17	0	0		18			2			REMIND		REMIND
'Emissions|F-Gases'	4	0	0	0	6	2	7	0	13	4	41	0	9		86			8			REMIND		REMIND
'Emissions|HFC'	3	3	0	0	6	2	7	0	17	1	39	0	5		83			9			REMIND		REMIND
'Emissions|HFC|HFC125'	3	3	0	0	6	0	7	0	11	4	7	0	6		47			8			MESSAGE		MESSAGE
'Emissions|HFC|HFC134a'	3	3	0	0	6	0	7	0	11	4	7	0	6		47			8			MESSAGE		MESSAGE
'Emissions|HFC|HFC143a'	3	3	0	0	6	0	7	0	11	4	7	0	6		47			8			MESSAGE		MESSAGE
'Emissions|HFC|HFC227ea'	3	3	0	0	6	0	7	0	11	4	7	0	6		47			8			MESSAGE		MESSAGE
'Emissions|HFC|HFC23'	3	3	0	0	6	0	7	0	11	4	7	0	6		47			8			MESSAGE		MESSAGE
'Emissions|HFC|HFC245fa'	3	3	0	0	6	0	7	0	11	0	1	0	5		36			7			MESSAGE		MESSAGE
'Emissions|HFC|HFC32'	3	3	0	0	6	0	7	0	11	4	7	0	6		47			8			MESSAGE		MESSAGE
'Emissions|HFC|HFC43-10'	3	3	0	0	6	0	7	0	11	4	7	0	6		47			8			MESSAGE		MESSAGE
'Emissions|HFC|Industrial Processes'	0	0	0	0	0	0	0	0	0	0	0	0	0		0			0			0		0
'Emissions|Kyoto Gases'	4	3	1	0	6	2	7	0	19	3	40	0	9		94			10			REMIND		REMIND
'Emissions|N2O'	4	3	1	0	6	2	7	0	20	4	41	0	9		97			10			REMIND		REMIND
'Emissions|N2O|AFOLU'	4	0	1	0	6	0	7	0	13	1	40	0	9		81			8			REMIND		REMIND
'Emissions|N2O|AFOLU|Agriculture'	3	0	0	0	0	0	7	0	7	0	25	0	5		47			5			REMIND		REMIND
'Emissions|N2O|AFOLU|Agriculture|Livestock|Manure Management'	3	0	0	0	0	0	7	0	7	0	25	0	0		42			4			REMIND		REMIND
'Emissions|N2O|AFOLU|Agriculture|Managed Soils'	3	0	0	0	0	0	7	0	7	0	25	0	0		42			4			REMIND		REMIND
'Emissions|N2O|AFOLU|Land'	1	0	0	0	0	0	7	0	0	0	0	0	0		8			2			IMAGE		IMAGE
'Emissions|N2O|Energy'	4	0	1	0	5	0	7	0	10	0	38	0	5		70			7			REMIND		REMIND
'Emissions|N2O|Energy|Demand|Residential and Commercial|Commercial'	0	0	0	0	0	0	7	0	0	0	0	0	0		7			1			IMAGE		0
'Emissions|N2O|Energy|Demand|Residential and Commercial|Residential'	0	0	0	0	0	0	7	0	0	0	0	0	0		7			1			IMAGE		0
'Emissions|N2O|Energy|Demand|Transportation'	1	0	0	0	0	0	7	0	0	0	17	0	0		25			3			REMIND		REMIND
'Emissions|N2O|Industrial Processes'	1	0	0	0	0	0	7	0	0	0	21	0	0		29			3			REMIND		REMIND
'Emissions|N2O|Industrial Processes|Chemicals'	0	0	0	0	0	0	7	0	0	0	0	0	0		7			1			IMAGE		0
'Emissions|N2O|Other'	0	0	1	0	0	0	7	0	0	0	26	0	5		39			4			REMIND		REMIND
'Emissions|N2O|Waste'	1	0	0	0	0	0	7	0	1	0	17	0	0		26			4			REMIND		REMIND
'Emissions|NH3'	3	3	0	0	6	0	7	0	19	3	40	0	7		88			8			REMIND		REMIND
'Emissions|NH3|AFOLU'	3	0	0	0	0	0	7	0	9	0	38	0	5		62			5			REMIND		REMIND
'Emissions|NH3|AFOLU|Agriculture'	1	0	0	0	0	0	7	0	0	0	0	0	0		8			2			IMAGE		IMAGE
'Emissions|NH3|AFOLU|Land'	1	0	0	0	0	0	0	0	0	0	0	0	0		1			1			AIM		0
'Emissions|NH3|Energy'	3	0	0	0	0	0	7	0	9	0	33	0	5		57			5			REMIND		REMIND
'Emissions|NH3|Energy|Demand|Industry'	3	0	0	0	0	0	7	0	9	0	33	0	5		57			5			REMIND		REMIND
'Emissions|NH3|Energy|Demand|Residential and Commercial'	1	0	0	0	0	0	7	0	9	0	33	0	5		55			5			REMIND		REMIND
'Emissions|NH3|Energy|Demand|Transportation'	3	0	0	0	0	0	7	0	9	0	33	0	5		57			5			REMIND		REMIND
'Emissions|NH3|Energy|Supply'	3	0	0	0	0	0	7	0	9	0	33	0	5		57			5			REMIND		REMIND
'Emissions|NH3|Industrial Processes'	1	0	0	0	0	0	0	0	0	0	0	0	0		1			1			AIM		0
'Emissions|NH3|Other'	0	0	0	0	0	0	0	0	0	0	23	0	0		23			1			REMIND		0
'Emissions|NH3|Waste'	1	0	0	0	0	0	0	0	0	0	17	0	0		18			2			REMIND		REMIND
'Emissions|NOx'	3	3	0	0	6	0	7	0	19	3	41	0	7		89			8			REMIND		REMIND
'Emissions|NOx|AFOLU'	3	0	0	0	0	0	7	0	9	0	38	0	5		62			5			REMIND		REMIND
'Emissions|NOx|AFOLU|Agriculture'	1	0	0	0	0	0	7	0	0	0	0	0	0		8			2			IMAGE		IMAGE
'Emissions|NOx|AFOLU|Land'	1	0	0	0	0	0	0	0	0	0	0	0	0		1			1			AIM		0
'Emissions|NOx|Energy'	3	0	0	0	0	0	7	0	9	0	38	0	5		62			5			REMIND		REMIND
'Emissions|NOx|Energy|Demand|Industry'	3	0	0	0	0	0	7	0	9	0	38	0	5		62			5			REMIND		REMIND
'Emissions|NOx|Energy|Demand|Residential and Commercial'	1	0	0	0	0	0	7	0	9	0	38	0	5		60			5			REMIND		REMIND
'Emissions|NOx|Energy|Demand|Residential and Commercial|Commercial'	0	0	0	0	0	0	7	0	0	0	0	0	0		7			1			IMAGE		0
'Emissions|NOx|Energy|Demand|Residential and Commercial|Residential'	0	0	0	0	0	0	7	0	0	0	0	0	0		7			1			IMAGE		0
'Emissions|NOx|Energy|Demand|Transportation'	3	0	0	0	0	0	7	0	9	0	38	0	5		62			5			REMIND		REMIND
'Emissions|NOx|Energy|Supply'	3	0	0	0	0	0	7	0	9	0	38	0	5		62			5			REMIND		REMIND
'Emissions|NOx|Industrial Processes'	1	0	0	0	0	0	7	0	0	0	0	0	0		8			2			IMAGE		IMAGE
'Emissions|NOx|Other'	0	0	0	0	0	0	0	0	0	0	28	0	5		33			2			REMIND		REMIND
'Emissions|NOx|Waste'	1	0	0	0	0	0	0	0	0	0	17	0	0		18			2			REMIND		REMIND
'Emissions|OC'	3	3	0	0	6	0	7	0	19	3	41	0	7		89			8			REMIND		REMIND
'Emissions|OC|AFOLU'	3	0	0	0	0	0	7	0	9	0	38	0	5		62			5			REMIND		REMIND
'Emissions|OC|AFOLU|Agriculture'	0	0	0	0	0	0	0	0	0	0	0	0	0		0			0			0		0
'Emissions|OC|AFOLU|Land'	1	0	0	0	0	0	0	0	0	0	0	0	0		1			1			AIM		0
'Emissions|OC|Energy'	3	0	0	0	0	0	7	0	9	0	38	0	5		62			5			REMIND		REMIND
'Emissions|OC|Energy|Demand|Industry'	3	0	0	0	0	0	7	0	9	0	38	0	5		62			5			REMIND		REMIND
'Emissions|OC|Energy|Demand|Residential and Commercial'	1	0	0	0	0	0	7	0	9	0	38	0	5		60			5			REMIND		REMIND
'Emissions|OC|Energy|Demand|Residential and Commercial|Commercial'	0	0	0	0	0	0	7	0	0	0	0	0	0		7			1			IMAGE		0
'Emissions|OC|Energy|Demand|Residential and Commercial|Residential'	0	0	0	0	0	0	7	0	0	0	0	0	0		7			1			IMAGE		0
'Emissions|OC|Energy|Demand|Transportation'	3	0	0	0	0	0	7	0	9	0	38	0	5		62			5			REMIND		REMIND
'Emissions|OC|Energy|Supply'	3	0	0	0	0	0	7	0	9	0	38	0	5		62			5			REMIND		REMIND
'Emissions|OC|Industrial Processes'	1	0	0	0	0	0	0	0	0	0	0	0	0		1			1			AIM		0
'Emissions|OC|Other'	0	0	0	0	0	0	0	0	0	0	28	0	5		33			2			REMIND		REMIND
'Emissions|OC|Waste'	1	0	0	0	0	0	0	0	0	0	17	0	0		18			2			REMIND		REMIND
'Emissions|PFC'	3	3	0	0	6	2	7	0	3	4	40	0	6		74			9			REMIND		REMIND
'Emissions|PFC|C2F6'	0	0	0	0	0	0	7	0	0	0	0	0	5		12			2			IMAGE		IMAGE
'Emissions|PFC|C6F14'	0	0	0	0	0	0	7	0	1	0	0	0	5		13			3			IMAGE		IMAGE
'Emissions|PFC|CF4'	0	0	0	0	0	0	7	0	12	0	0	0	5		24			3			MESSAGE		MESSAGE
'Emissions|PM2.5'	1	0	0	0	0	0	0	0	1	0	1	0	0		3			3			AIM		AIM
'Emissions|SF6'	3	3	0	0	6	2	7	0	12	4	40	0	6		83			9			REMIND		REMIND
'Emissions|Sulfur'	4	3	1	0	6	2	7	0	20	4	41	0	9		97			10			REMIND		REMIND
'Emissions|Sulfur|AFOLU'	3	0	0	0	0	0	7	0	9	0	38	0	5		62			5			REMIND		REMIND
'Emissions|Sulfur|AFOLU|Agriculture'	0	0	0	0	0	0	0	0	0	0	0	0	0		0			0			0		0
'Emissions|Sulfur|AFOLU|Land'	1	0	0	0	0	0	0	0	0	0	0	0	0		1			1			AIM		0
'Emissions|Sulfur|Energy'	3	0	0	0	0	0	7	0	9	0	38	0	5		62			5			REMIND		REMIND
'Emissions|Sulfur|Energy|Demand|Industry'	3	0	0	0	0	0	7	0	9	0	38	0	5		62			5			REMIND		REMIND
'Emissions|Sulfur|Energy|Demand|Residential and Commercial'	1	0	0	0	0	0	7	0	9	0	38	0	5		60			5			REMIND		REMIND
'Emissions|Sulfur|Energy|Demand|Residential and Commercial|Commercial'	0	0	0	0	0	0	7	0	0	0	0	0	0		7			1			IMAGE		0
'Emissions|Sulfur|Energy|Demand|Residential and Commercial|Residential'	0	0	0	0	0	0	7	0	0	0	0	0	0		7			1			IMAGE		0
'Emissions|Sulfur|Energy|Demand|Transportation'	3	0	0	0	0	0	7	0	9	0	38	0	5		62			5			REMIND		REMIND
'Emissions|Sulfur|Energy|Supply'	3	0	0	0	0	0	7	0	9	0	38	0	5		62			5			REMIND		REMIND
'Emissions|Sulfur|Industrial Processes'	1	0	0	0	0	0	7	0	0	0	0	0	0		8			2			IMAGE		IMAGE
'Emissions|Sulfur|Other'	0	0	0	0	0	0	0	0	0	0	28	0	5		33			2			REMIND		REMIND
'Emissions|Sulfur|Waste'	1	0	0	0	0	0	0	0	0	0	17	0	0		18			2			REMIND		REMIND
'Emissions|VOC'	3	3	0	0	6	0	7	0	19	3	40	0	7		88			8			REMIND		REMIND
'Emissions|VOC|AFOLU'	3	0	0	0	0	0	7	0	9	0	38	0	5		62			5			REMIND		REMIND
'Emissions|VOC|AFOLU|Agriculture'	0	0	0	0	0	0	0	0	0	0	0	0	0		0			0			0		0
'Emissions|VOC|AFOLU|Land'	1	0	0	0	0	0	0	0	0	0	0	0	0		1			1			AIM		0
'Emissions|VOC|Energy'	3	0	0	0	0	0	7	0	9	0	38	0	5		62			5			REMIND		REMIND
'Emissions|VOC|Energy|Demand|Industry'	3	0	0	0	0	0	7	0	9	0	38	0	5		62			5			REMIND		REMIND
'Emissions|VOC|Energy|Demand|Residential and Commercial'	1	0	0	0	0	0	7	0	9	0	38	0	5		60			5			REMIND		REMIND
'Emissions|VOC|Energy|Demand|Residential and Commercial|Commercial'	0	0	0	0	0	0	7	0	0	0	0	0	0		7			1			IMAGE		0
'Emissions|VOC|Energy|Demand|Residential and Commercial|Residential'	0	0	0	0	0	0	7	0	0	0	0	0	0		7			1			IMAGE		0
'Emissions|VOC|Energy|Demand|Transportation'	3	0	0	0	0	0	7	0	9	0	38	0	5		62			5			REMIND		REMIND
'Emissions|VOC|Energy|Supply'	3	0	0	0	0	0	7	0	9	0	38	0	5		62			5			REMIND		REMIND
'Emissions|VOC|Industrial Processes'	1	0	0	0	0	0	7	0	0	0	0	0	0		8			2			IMAGE		IMAGE
'Emissions|VOC|Other'	0	0	0	0	0	0	0	0	0	0	28	0	5		33			2			REMIND		REMIND
'Emissions|VOC|Waste'	1	0	0	0	0	0	0	0	0	0	17	0	0		18			2			REMIND		REMIND
'Employment'	0	0	0	0	0	2	0	0	0	0	0	0	0		2			1			GEM-E3		0
'Employment|Agriculture'	0	0	0	0	0	2	0	0	0	0	0	0	0		2			1			GEM-E3		0
'Employment|Industry'	0	0	0	0	0	2	0	0	0	0	0	0	0		2			1			GEM-E3		0
'Employment|Industry|Energy'	0	0	0	0	0	0	0	0	0	0	0	0	0		0			0			0		0
'Employment|Industry|Energy Intensive'	0	0	0	0	0	2	0	0	0	0	0	0	0		2			1			GEM-E3		0
'Employment|Industry|Manufacturing'	0	0	0	0	0	0	0	0	0	0	0	0	0		0			0			0		0
'Employment|Service'	0	0	0	0	0	2	0	0	0	0	0	0	0		2			1			GEM-E3		0
'Energy Service|Residential and Commercial|Commercial|Floor Space'	0	0	0	0	0	0	0	0	1	0	3	0	0		4			2			REMIND		REMIND
'Energy Service|Residential and Commercial|Floor Space'	0	0	0	0	0	0	0	0	0	0	3	0	0		3			1			REMIND		0
'Energy Service|Residential and Commercial|Residential|Floor Space'	0	0	0	0	0	0	7	0	1	0	3	0	0		11			3			IMAGE		IMAGE
'Energy Service|Transportation|Aviation'	0	0	0	0	0	0	0	0	0	0	2	0	0		2			1			REMIND		0
'Energy Service|Transportation|Freight'	2	0	0	0	0	0	7	0	1	3	39	0	5		57			6			REMIND		REMIND
'Energy Service|Transportation|Freight|Aviation'	2	0	0	0	0	0	7	0	0	0	0	0	0		9			2			IMAGE		IMAGE
'Energy Service|Transportation|Freight|International Shipping'	2	0	0	0	0	0	7	0	0	0	2	0	0		11			3			IMAGE		IMAGE
'Energy Service|Transportation|Freight|Navigation'	2	0	0	0	0	0	7	0	0	0	2	0	0		11			3			IMAGE		IMAGE
'Energy Service|Transportation|Freight|Railways'	2	0	0	0	0	0	7	0	0	0	2	0	0		11			3			IMAGE		IMAGE
'Energy Service|Transportation|Freight|Road'	2	0	0	0	0	0	7	0	0	0	2	0	5		16			4			IMAGE		IMAGE
'Energy Service|Transportation|Navigation'	0	0	0	0	0	0	0	0	0	0	2	0	0		2			1			REMIND		0
'Energy Service|Transportation|Passenger'	2	0	0	0	0	0	7	0	1	3	39	0	5		57			6			REMIND		REMIND
'Energy Service|Transportation|Passenger|Aviation'	2	0	0	0	0	0	7	0	0	0	2	0	0		11			3			IMAGE		IMAGE
'Energy Service|Transportation|Passenger|Bicycling and Walking'	0	0	0	0	0	0	7	0	0	0	2	0	0		9			2			IMAGE		IMAGE
'Energy Service|Transportation|Passenger|Railways'	2	0	0	0	0	0	7	0	0	0	2	0	0		11			3			IMAGE		IMAGE
'Energy Service|Transportation|Passenger|Road'	2	0	0	0	0	0	7	0	0	0	2	0	5		16			4			IMAGE		IMAGE
'Energy Service|Transportation|Passenger|Road|2W and 3W'	0	0	0	0	0	0	0	0	0	0	0	0	0		0			0			0		0
'Energy Service|Transportation|Passenger|Road|Bus'	2	0	0	0	0	0	7	0	0	0	2	0	0		11			3			IMAGE		IMAGE
'Energy Service|Transportation|Passenger|Road|LDV'	2	0	0	0	0	0	7	0	0	0	29	0	0		38			3			REMIND		REMIND
'Energy Service|Transportation|Rail'	0	0	0	0	0	0	0	0	0	0	2	0	0		2			1			REMIND		0
'Energy Service|Transportation|Road'	0	0	0	0	0	0	0	0	0	0	2	0	0		2			1			REMIND		0
'Eutrophication|Marine|Electricity'	1	0	0	0	0	0	0	0	1	0	1	0	0		3			3			AIM		AIM
'Expenditure|Energy|Fossil'	0	0	0	0	0	0	0	0	0	0	0	0	0		0			0			0		0
'Expenditure|Medical System|Incremental'	0	0	0	0	0	2	0	0	0	0	0	0	0		2			1			GEM-E3		0
'Expenditure|RnD'	0	0	0	0	0	0	0	0	0	0	0	0	5		5			1			WITCH		0
'Expenditure|government'	0	0	0	0	0	0	0	0	0	0	0	0	0		0			0			0		0
'Expenditure|household'	0	0	0	0	0	2	0	0	0	0	0	0	0		2			1			GEM-E3		0
'Expenditure|household|Energy'	0	0	0	0	0	2	0	0	0	0	0	0	0		2			1			GEM-E3		0
'Expenditure|household|Food'	0	0	0	0	0	2	0	0	0	0	17	0	0		19			2			REMIND		REMIND
'Expenditure|household|Industry'	0	0	0	0	0	0	0	0	0	0	0	0	0		0			0			0		0
'Expenditure|household|Services'	0	0	0	0	0	2	0	0	0	0	0	0	0		2			1			GEM-E3		0
'Expenditure|household|Services|health'	0	0	0	0	0	0	0	0	0	0	0	0	0		0			0			0		0
'Export'	0	0	0	0	0	0	0	0	0	0	0	0	0		0			0			0		0
'Export|Agriculture'	0	0	0	0	0	0	0	0	0	0	0	0	0		0			0			0		0
'Export|Energy'	0	0	0	0	0	0	0	0	0	0	0	0	5		5			1			WITCH		0
'Export|Industry'	0	0	0	0	0	0	0	0	0	0	0	0	0		0			0			0		0
'Export|Industry|Energy'	0	0	0	0	0	0	0	0	0	0	0	0	0		0			0			0		0
'Export|Industry|Energy Intensive'	0	0	0	0	0	0	0	0	0	0	0	0	0		0			0			0		0
'Export|Industry|Manufacturing'	0	0	0	0	0	0	0	0	0	0	0	0	0		0			0			0		0
'Export|Other'	0	0	0	0	0	0	0	0	0	0	0	0	0		0			0			0		0
'Fertilizer Use|Nitrogen'	4	0	0	0	0	0	7	0	10	0	23	0	0		44			4			REMIND		REMIND
'Fertilizer Use|Phosphorus'	0	0	0	0	0	0	0	0	9	0	0	0	0		9			1			MESSAGE		0
'Final Energy'	4	0	1	0	6	2	7	0	20	4	41	0	9		94			9			REMIND		REMIND
'Final Energy (excl. feedstocks)|Industry'	0	0	0	0	0	0	7	0	0	0	0	0	0		7			1			IMAGE		0
'Final Energy (excl. feedstocks)|Industry|Electricity'	0	0	0	0	0	0	7	0	0	0	0	0	0		7			1			IMAGE		0
'Final Energy (excl. feedstocks)|Industry|Gases'	0	0	0	0	0	0	7	0	0	0	0	0	0		7			1			IMAGE		0
'Final Energy (excl. feedstocks)|Industry|Gases|Bioenergy'	0	0	0	0	0	0	0	0	0	0	0	0	0		0			0			0		0
'Final Energy (excl. feedstocks)|Industry|Gases|Fossil'	0	0	0	0	0	0	7	0	0	0	0	0	0		7			1			IMAGE		0
'Final Energy (excl. feedstocks)|Industry|Gases|Hydrogen synfuel'	0	0	0	0	0	0	0	0	0	0	0	0	0		0			0			0		0
'Final Energy (excl. feedstocks)|Industry|Heat'	0	0	0	0	0	0	7	0	0	0	0	0	0		7			1			IMAGE		0
'Final Energy (excl. feedstocks)|Industry|Hydrogen'	0	0	0	0	0	0	7	0	0	0	0	0	0		7			1			IMAGE		0
'Final Energy (excl. feedstocks)|Industry|Liquids'	0	0	0	0	0	0	7	0	0	0	0	0	0		7			1			IMAGE		0
'Final Energy (excl. feedstocks)|Industry|Liquids|Bioenergy'	0	0	0	0	0	0	7	0	0	0	0	0	0		7			1			IMAGE		0
'Final Energy (excl. feedstocks)|Industry|Liquids|Fossil'	0	0	0	0	0	0	7	0	0	0	0	0	0		7			1			IMAGE		0
'Final Energy (excl. feedstocks)|Industry|Liquids|Hydrogen synfuel'	0	0	0	0	0	0	0	0	0	0	0	0	0		0			0			0		0
'Final Energy (excl. feedstocks)|Industry|Other'	0	0	0	0	0	0	0	0	0	0	0	0	0		0			0			0		0
'Final Energy (excl. feedstocks)|Industry|Solids'	0	0	0	0	0	0	7	0	0	0	0	0	0		7			1			IMAGE		0
'Final Energy (excl. feedstocks)|Industry|Solids|Bioenergy'	0	0	0	0	0	0	7	0	0	0	0	0	0		7			1			IMAGE		0
'Final Energy (excl. feedstocks)|Industry|Solids|Fossil'	0	0	0	0	0	0	7	0	0	0	0	0	0		7			1			IMAGE		0
'Final Energy|Electricity'	4	0	1	0	6	2	7	0	15	4	41	0	9		89			9			REMIND		REMIND
'Final Energy|Gases'	4	0	1	0	6	2	7	0	15	4	41	0	9		89			9			REMIND		REMIND
'Final Energy|Geothermal'	3	0	0	0	0	0	0	0	11	1	21	0	2		38			5			REMIND		REMIND
'Final Energy|Heat'	4	0	0	0	6	2	7	0	15	4	41	0	2		81			8			REMIND		REMIND
'Final Energy|Hydrogen'	3	0	1	0	6	2	7	0	15	4	41	0	7		86			9			REMIND		REMIND
'Final Energy|Industry'	4	0	1	0	6	2	7	0	19	3	38	0	7		87			9			REMIND		REMIND
'Final Energy|Industry|Cement|Electricity'	0	0	0	0	0	0	7	0	0	0	2	0	0		9			2			IMAGE		IMAGE
'Final Energy|Industry|Cement|Gases'	0	0	0	0	0	0	7	0	0	0	2	0	0		9			2			IMAGE		IMAGE
'Final Energy|Industry|Cement|Gases|Bioenergy'	0	0	0	0	0	0	0	0	0	0	0	0	0		0			0			0		0
'Final Energy|Industry|Cement|Gases|Fossil'	0	0	0	0	0	0	0	0	0	0	0	0	0		0			0			0		0
'Final Energy|Industry|Cement|Gases|Hydrogen synfuel'	0	0	0	0	0	0	0	0	0	0	0	0	0		0			0			0		0
'Final Energy|Industry|Cement|Heat'	0	0	0	0	0	0	7	0	0	0	2	0	0		9			2			IMAGE		IMAGE
'Final Energy|Industry|Cement|Hydrogen'	0	0	0	0	0	0	7	0	0	0	2	0	0		9			2			IMAGE		IMAGE
'Final Energy|Industry|Cement|Liquids'	0	0	0	0	0	0	7	0	0	0	2	0	0		9			2			IMAGE		IMAGE
'Final Energy|Industry|Cement|Liquids|Bioenergy'	0	0	0	0	0	0	0	0	0	0	0	0	0		0			0			0		0
'Final Energy|Industry|Cement|Liquids|Fossil'	0	0	0	0	0	0	7	0	0	0	0	0	0		7			1			IMAGE		0
'Final Energy|Industry|Cement|Liquids|Hydrogen synfuel'	0	0	0	0	0	0	0	0	0	0	0	0	0		0			0			0		0
'Final Energy|Industry|Cement|Other'	0	0	0	0	0	0	0	0	0	0	0	0	0		0			0			0		0
'Final Energy|Industry|Cement|Solids'	0	0	0	0	0	0	7	0	0	0	2	0	0		9			2			IMAGE		IMAGE
'Final Energy|Industry|Cement|Solids|Bioenergy'	0	0	0	0	0	0	7	0	0	0	0	0	0		7			1			IMAGE		0
'Final Energy|Industry|Cement|Solids|Fossil'	0	0	0	0	0	0	7	0	0	0	0	0	0		7			1			IMAGE		0
'Final Energy|Industry|Chemicals|Ammonia|Electricity'	0	0	0	0	0	0	7	0	0	0	0	0	0		7			1			IMAGE		0
'Final Energy|Industry|Chemicals|Ammonia|Gases'	0	0	0	0	0	0	7	0	0	0	0	0	0		7			1			IMAGE		0
'Final Energy|Industry|Chemicals|Ammonia|Gases|Bioenergy'	0	0	0	0	0	0	0	0	0	0	0	0	0		0			0			0		0
'Final Energy|Industry|Chemicals|Ammonia|Gases|Fossil'	0	0	0	0	0	0	7	0	0	0	0	0	0		7			1			IMAGE		0
'Final Energy|Industry|Chemicals|Ammonia|Heat'	0	0	0	0	0	0	0	0	0	0	0	0	0		0			0			0		0
'Final Energy|Industry|Chemicals|Ammonia|Hydrogen'	0	0	0	0	0	0	0	0	0	0	0	0	0		0			0			0		0
'Final Energy|Industry|Chemicals|Ammonia|Liquids'	0	0	0	0	0	0	7	0	0	0	0	0	0		7			1			IMAGE		0
'Final Energy|Industry|Chemicals|Ammonia|Liquids|Bioenergy'	0	0	0	0	0	0	7	0	0	0	0	0	0		7			1			IMAGE		0
'Final Energy|Industry|Chemicals|Ammonia|Liquids|Fossil'	0	0	0	0	0	0	7	0	0	0	0	0	0		7			1			IMAGE		0
'Final Energy|Industry|Chemicals|Ammonia|Other'	0	0	0	0	0	0	7	0	0	0	0	0	0		7			1			IMAGE		0
'Final Energy|Industry|Chemicals|Ammonia|Solids'	0	0	0	0	0	0	7	0	0	0	0	0	0		7			1			IMAGE		0
'Final Energy|Industry|Chemicals|Ammonia|Solids|Bioenergy'	0	0	0	0	0	0	7	0	0	0	0	0	0		7			1			IMAGE		0
'Final Energy|Industry|Chemicals|Ammonia|Solids|Fossil'	0	0	0	0	0	0	7	0	0	0	0	0	0		7			1			IMAGE		0
'Final Energy|Industry|Chemicals|Electricity'	0	0	0	0	0	0	7	0	0	0	2	0	0		9			2			IMAGE		IMAGE
'Final Energy|Industry|Chemicals|Gases'	0	0	0	0	0	0	7	0	0	0	2	0	0		9			2			IMAGE		IMAGE
'Final Energy|Industry|Chemicals|Gases|Bioenergy'	0	0	0	0	0	0	0	0	0	0	0	0	0		0			0			0		0
'Final Energy|Industry|Chemicals|Gases|Fossil'	0	0	0	0	0	0	0	0	0	0	0	0	0		0			0			0		0
'Final Energy|Industry|Chemicals|Gases|Hydrogen synfuel'	0	0	0	0	0	0	0	0	0	0	0	0	0		0			0			0		0
'Final Energy|Industry|Chemicals|Heat'	0	0	0	0	0	0	0	0	0	0	2	0	0		2			1			REMIND		0
'Final Energy|Industry|Chemicals|High value chemicals|Electricity'	0	0	0	0	0	0	7	0	0	0	0	0	0		7			1			IMAGE		0
'Final Energy|Industry|Chemicals|High value chemicals|Gases'	0	0	0	0	0	0	7	0	0	0	0	0	0		7			1			IMAGE		0
'Final Energy|Industry|Chemicals|High value chemicals|Gases|Fossil'	0	0	0	0	0	0	7	0	0	0	0	0	0		7			1			IMAGE		0
'Final Energy|Industry|Chemicals|High value chemicals|Liquids'	0	0	0	0	0	0	7	0	0	0	0	0	0		7			1			IMAGE		0
'Final Energy|Industry|Chemicals|High value chemicals|Liquids|Bioenergy'	0	0	0	0	0	0	7	0	0	0	0	0	0		7			1			IMAGE		0
'Final Energy|Industry|Chemicals|High value chemicals|Liquids|Fossil'	0	0	0	0	0	0	7	0	0	0	0	0	0		7			1			IMAGE		0
'Final Energy|Industry|Chemicals|High value chemicals|Solids'	0	0	0	0	0	0	7	0	0	0	0	0	0		7			1			IMAGE		0
'Final Energy|Industry|Chemicals|High value chemicals|Solids|Bioenergy'	0	0	0	0	0	0	7	0	0	0	0	0	0		7			1			IMAGE		0
'Final Energy|Industry|Chemicals|High value chemicals|Solids|Fossil'	0	0	0	0	0	0	7	0	0	0	0	0	0		7			1			IMAGE		0
'Final Energy|Industry|Chemicals|Hydrogen'	0	0	0	0	0	0	0	0	0	0	2	0	0		2			1			REMIND		0
'Final Energy|Industry|Chemicals|Liquids'	0	0	0	0	0	0	7	0	0	0	2	0	0		9			2			IMAGE		IMAGE
'Final Energy|Industry|Chemicals|Liquids|Bioenergy'	0	0	0	0	0	0	7	0	0	0	0	0	0		7			1			IMAGE		0
'Final Energy|Industry|Chemicals|Liquids|Fossil'	0	0	0	0	0	0	7	0	0	0	0	0	0		7			1			IMAGE		0
'Final Energy|Industry|Chemicals|Liquids|Hydrogen synfuel'	0	0	0	0	0	0	0	0	0	0	0	0	0		0			0			0		0
'Final Energy|Industry|Chemicals|Other'	0	0	0	0	0	0	0	0	0	0	0	0	0		0			0			0		0
'Final Energy|Industry|Chemicals|Solids'	0	0	0	0	0	0	7	0	0	0	2	0	0		9			2			IMAGE		IMAGE
'Final Energy|Industry|Chemicals|Solids|Bioenergy'	0	0	0	0	0	0	7	0	0	0	0	0	0		7			1			IMAGE		0
'Final Energy|Industry|Chemicals|Solids|Fossil'	0	0	0	0	0	0	7	0	0	0	0	0	0		7			1			IMAGE		0
'Final Energy|Industry|Electricity'	3	0	1	0	5	2	7	0	18	4	39	0	5		84			9			REMIND		REMIND
'Final Energy|Industry|Gases'	3	0	1	0	5	2	7	0	18	4	39	0	5		84			9			REMIND		REMIND
'Final Energy|Industry|Gases|'	0	0	0	0	0	0	0	0	0	0	0	0	0		0			0			0		0
'Final Energy|Industry|Gases|Bioenergy'	0	0	0	0	0	0	0	0	0	0	21	0	0		21			1			REMIND		0
'Final Energy|Industry|Gases|Fossil'	0	0	0	0	0	0	0	0	0	0	0	0	0		0			0			0		0
'Final Energy|Industry|Gases|Hydrogen synfuel'	0	0	0	0	0	0	0	0	0	0	0	0	0		0			0			0		0
'Final Energy|Industry|Heat'	3	0	0	0	5	0	7	0	18	4	39	0	0		76			6			REMIND		REMIND
'Final Energy|Industry|Hydrogen'	2	0	1	0	5	2	7	0	18	4	39	0	0		78			8			REMIND		REMIND
'Final Energy|Industry|Liquids'	3	0	1	0	5	2	7	0	18	4	39	0	5		84			9			REMIND		REMIND
'Final Energy|Industry|Liquids|'	0	0	0	0	0	0	0	0	0	0	0	0	0		0			0			0		0
'Final Energy|Industry|Liquids|Bioenergy'	0	0	0	0	0	0	0	0	0	0	0	0	0		0			0			0		0
'Final Energy|Industry|Liquids|Fossil'	0	0	0	0	0	0	0	0	0	0	0	0	0		0			0			0		0
'Final Energy|Industry|Liquids|Hydrogen synfuel'	0	0	0	0	0	0	0	0	0	0	0	0	0		0			0			0		0
'Final Energy|Industry|Liquids|Oil'	1	0	0	0	0	0	0	0	3	0	0	0	0		4			2			MESSAGE		MESSAGE
'Final Energy|Industry|Other'	0	0	0	0	0	2	6	0	18	4	0	0	0		30			4			MESSAGE		MESSAGE
'Final Energy|Industry|Other|Electricity'	0	0	0	0	0	0	7	0	0	0	2	0	0		9			2			IMAGE		IMAGE
'Final Energy|Industry|Other|Gases'	0	0	0	0	0	0	7	0	0	0	2	0	0		9			2			IMAGE		IMAGE
'Final Energy|Industry|Other|Gases|Fossil'	0	0	0	0	0	0	7	0	0	0	0	0	0		7			1			IMAGE		0
'Final Energy|Industry|Other|Heat'	0	0	0	0	0	0	7	0	0	0	2	0	0		9			2			IMAGE		IMAGE
'Final Energy|Industry|Other|Hydrogen'	0	0	0	0	0	0	7	0	0	0	2	0	0		9			2			IMAGE		IMAGE
'Final Energy|Industry|Other|Liquids'	0	0	0	0	0	0	7	0	0	0	2	0	0		9			2			IMAGE		IMAGE
'Final Energy|Industry|Other|Liquids|Bioenergy'	0	0	0	0	0	0	7	0	0	0	0	0	0		7			1			IMAGE		0
'Final Energy|Industry|Other|Liquids|Fossil'	0	0	0	0	0	0	7	0	0	0	0	0	0		7			1			IMAGE		0
'Final Energy|Industry|Other|Solids'	0	0	0	0	0	0	7	0	0	0	2	0	0		9			2			IMAGE		IMAGE
'Final Energy|Industry|Other|Solids|Bioenergy'	0	0	0	0	0	0	7	0	0	0	0	0	0		7			1			IMAGE		0
'Final Energy|Industry|Other|Solids|Fossil'	0	0	0	0	0	0	7	0	0	0	0	0	0		7			1			IMAGE		0
'Final Energy|Industry|Solids'	3	0	1	0	5	2	7	0	18	4	39	0	5		84			9			REMIND		REMIND
'Final Energy|Industry|Solids|Biomass'	3	0	1	0	5	0	7	0	11	1	38	0	5		71			8			REMIND		REMIND
'Final Energy|Industry|Solids|Coal'	3	0	1	0	5	0	7	0	11	1	38	0	5		71			8			REMIND		REMIND
'Final Energy|Industry|Steel|Electricity'	0	0	0	0	0	0	7	0	0	0	2	0	0		9			2			IMAGE		IMAGE
'Final Energy|Industry|Steel|Gases'	0	0	0	0	0	0	7	0	0	0	2	0	0		9			2			IMAGE		IMAGE
'Final Energy|Industry|Steel|Gases|Bioenergy'	0	0	0	0	0	0	0	0	0	0	0	0	0		0			0			0		0
'Final Energy|Industry|Steel|Gases|Fossil'	0	0	0	0	0	0	0	0	0	0	0	0	0		0			0			0		0
'Final Energy|Industry|Steel|Gases|Hydrogen synfuel'	0	0	0	0	0	0	0	0	0	0	0	0	0		0			0			0		0
'Final Energy|Industry|Steel|Heat'	0	0	0	0	0	0	7	0	0	0	6	0	0		13			2			IMAGE		IMAGE
'Final Energy|Industry|Steel|Hydrogen'	0	0	0	0	0	0	7	0	0	0	2	0	0		9			2			IMAGE		IMAGE
'Final Energy|Industry|Steel|Liquids'	0	0	0	0	0	0	7	0	0	0	2	0	0		9			2			IMAGE		IMAGE
'Final Energy|Industry|Steel|Liquids|Bioenergy'	0	0	0	0	0	0	0	0	0	0	0	0	0		0			0			0		0
'Final Energy|Industry|Steel|Liquids|Fossil'	0	0	0	0	0	0	7	0	0	0	0	0	0		7			1			IMAGE		0
'Final Energy|Industry|Steel|Liquids|Hydrogen synfuel'	0	0	0	0	0	0	0	0	0	0	0	0	0		0			0			0		0
'Final Energy|Industry|Steel|Other'	0	0	0	0	0	0	0	0	0	0	0	0	0		0			0			0		0
'Final Energy|Industry|Steel|Solids'	0	0	0	0	0	0	7	0	0	0	2	0	0		9			2			IMAGE		IMAGE
'Final Energy|Industry|Steel|Solids|Bioenergy'	0	0	0	0	0	0	7	0	0	0	0	0	0		7			1			IMAGE		0
'Final Energy|Industry|Steel|Solids|Fossil'	0	0	0	0	0	0	7	0	0	0	0	0	0		7			1			IMAGE		0
'Final Energy|Liquids'	4	0	1	0	6	2	7	0	15	4	41	0	9		89			9			REMIND		REMIND
'Final Energy|Non-Energy Use'	3	0	0	0	5	2	7	0	9	0	0	0	0		26			5			MESSAGE		MESSAGE
'Final Energy|Non-Energy Use|Biomass'	2	0	0	0	5	2	7	0	9	0	0	0	0		25			5			MESSAGE		MESSAGE
'Final Energy|Non-Energy Use|Coal'	2	0	0	0	5	2	7	0	9	0	5	0	5		35			7			MESSAGE		MESSAGE
'Final Energy|Non-Energy Use|Gas'	3	0	0	0	5	2	7	0	9	0	5	0	0		31			6			MESSAGE		MESSAGE
'Final Energy|Non-Energy Use|Oil'	3	0	0	0	5	2	7	0	9	0	5	0	0		31			6			MESSAGE		MESSAGE
'Final Energy|Other'	0	0	0	0	0	2	0	0	0	0	0	0	0		2			1			GEM-E3		0
'Final Energy|Other Sector'	3	0	1	0	0	0	7	0	0	0	29	0	0		40			4			REMIND		REMIND
'Final Energy|Other Sector|Electricity'	3	0	1	0	0	0	7	0	0	0	29	0	0		40			4			REMIND		REMIND
'Final Energy|Other Sector|Gases'	3	0	1	0	0	0	7	0	0	0	29	0	0		40			4			REMIND		REMIND
'Final Energy|Other Sector|Heat'	3	0	0	0	0	0	7	0	0	0	0	0	0		10			2			IMAGE		IMAGE
'Final Energy|Other Sector|Hydrogen'	0	0	1	0	0	0	7	0	0	0	29	0	0		37			3			REMIND		REMIND
'Final Energy|Other Sector|Liquids'	3	0	1	0	0	0	7	0	0	0	29	0	0		40			4			REMIND		REMIND
'Final Energy|Other Sector|Other'	0	0	0	0	0	0	0	0	0	0	0	0	0		0			0			0		0
'Final Energy|Other Sector|Solids'	3	0	1	0	0	0	7	0	0	0	0	0	0		11			3			IMAGE		IMAGE
'Final Energy|Other Sector|Solids|Biomass'	2	0	1	0	0	0	7	0	0	0	0	0	0		10			3			IMAGE		IMAGE
'Final Energy|Other Sector|Solids|Biomass|Traditional'	0	0	0	0	0	0	7	0	0	0	0	0	0		7			1			IMAGE		0
'Final Energy|Other Sector|Solids|Coal'	3	0	1	0	0	0	7	0	0	0	0	0	0		11			3			IMAGE		IMAGE
'Final Energy|Residential and Commercial'	4	0	1	0	5	2	7	0	16	1	39	0	7		82			9			REMIND		REMIND
'Final Energy|Residential and Commercial|Appliances'	0	0	0	0	0	0	7	0	0	0	0	0	0		7			1			IMAGE		0
'Final Energy|Residential and Commercial|Commercial'	2	0	1	0	0	2	7	0	0	0	0	0	5		17			5			IMAGE		IMAGE
'Final Energy|Residential and Commercial|Commercial|Appliances'	0	0	0	0	0	0	7	0	0	0	0	0	0		7			1			IMAGE		0
'Final Energy|Residential and Commercial|Commercial|Cooling'	0	0	0	0	0	0	7	0	0	0	0	0	0		7			1			IMAGE		0
'Final Energy|Residential and Commercial|Commercial|Electricity'	2	0	1	0	0	0	7	0	0	0	0	0	5		15			4			IMAGE		IMAGE
'Final Energy|Residential and Commercial|Commercial|Gases'	2	0	1	0	0	0	7	0	0	0	0	0	5		15			4			IMAGE		IMAGE
'Final Energy|Residential and Commercial|Commercial|Heat'	2	0	0	0	0	0	7	0	0	0	0	0	0		9			2			IMAGE		IMAGE
'Final Energy|Residential and Commercial|Commercial|Heating'	0	0	0	0	0	0	7	0	0	0	0	0	0		7			1			IMAGE		0
'Final Energy|Residential and Commercial|Commercial|Heating|Cooking'	0	0	0	0	0	0	7	0	0	0	0	0	0		7			1			IMAGE		0
'Final Energy|Residential and Commercial|Commercial|Heating|Space'	0	0	0	0	0	0	7	0	0	0	0	0	0		7			1			IMAGE		0
'Final Energy|Residential and Commercial|Commercial|Heating|Water'	0	0	0	0	0	0	7	0	0	0	0	0	0		7			1			IMAGE		0
'Final Energy|Residential and Commercial|Commercial|Hydrogen'	0	0	1	0	0	0	7	0	0	0	0	0	0		8			2			IMAGE		IMAGE
'Final Energy|Residential and Commercial|Commercial|Lighting'	0	0	0	0	0	0	7	0	0	0	0	0	0		7			1			IMAGE		0
'Final Energy|Residential and Commercial|Commercial|Liquids'	2	0	1	0	0	0	7	0	0	0	0	0	5		15			4			IMAGE		IMAGE
'Final Energy|Residential and Commercial|Commercial|Other'	0	0	0	0	0	0	0	0	0	0	0	0	0		0			0			0		0
'Final Energy|Residential and Commercial|Commercial|Solids'	2	0	1	0	0	0	7	0	0	0	0	0	5		15			4			IMAGE		IMAGE
'Final Energy|Residential and Commercial|Commercial|Solids|Biomass'	2	0	0	0	0	0	7	0	0	0	0	0	0		9			2			IMAGE		IMAGE
'Final Energy|Residential and Commercial|Commercial|Solids|Biomass|Traditional'	2	0	0	0	0	0	7	0	0	0	0	0	0		9			2			IMAGE		IMAGE
'Final Energy|Residential and Commercial|Commercial|Solids|Coal'	2	0	0	0	0	0	7	0	0	0	0	0	0		9			2			IMAGE		IMAGE
'Final Energy|Residential and Commercial|Commercial|Water|Desalination'	0	0	0	0	0	0	0	0	0	0	0	0	0		0			0			0		0
'Final Energy|Residential and Commercial|Cooling'	0	0	0	0	0	0	7	0	0	0	0	0	0		7			1			IMAGE		0
'Final Energy|Residential and Commercial|Electricity'	3	0	1	0	5	2	7	0	15	0	38	0	5		76			8			REMIND		REMIND
'Final Energy|Residential and Commercial|Gases'	3	0	1	0	5	2	7	0	15	0	38	0	5		76			8			REMIND		REMIND
'Final Energy|Residential and Commercial|Heat'	3	0	1	0	5	2	7	0	15	1	39	0	0		73			8			REMIND		REMIND
'Final Energy|Residential and Commercial|Heating'	0	0	0	0	0	0	7	0	0	0	0	0	0		7			1			IMAGE		0
'Final Energy|Residential and Commercial|Heating|Cooking'	0	0	0	0	0	0	7	0	0	0	0	0	0		7			1			IMAGE		0
'Final Energy|Residential and Commercial|Heating|Space'	0	0	0	0	0	0	7	0	0	0	0	0	0		7			1			IMAGE		0
'Final Energy|Residential and Commercial|Heating|Water'	0	0	0	0	0	0	7	0	0	0	0	0	0		7			1			IMAGE		0
'Final Energy|Residential and Commercial|Hydrogen'	2	0	1	0	0	2	7	0	15	0	38	0	0		65			6			REMIND		REMIND
'Final Energy|Residential and Commercial|Lighting'	0	0	0	0	0	0	7	0	0	0	0	0	0		7			1			IMAGE		0
'Final Energy|Residential and Commercial|Liquids'	3	0	1	0	5	2	7	0	15	0	38	0	5		76			8			REMIND		REMIND
'Final Energy|Residential and Commercial|Other'	0	0	1	0	0	2	0	0	15	0	0	0	0		18			3			MESSAGE		MESSAGE
'Final Energy|Residential and Commercial|Residential'	2	0	1	0	0	2	7	0	0	0	0	0	5		17			5			IMAGE		IMAGE
'Final Energy|Residential and Commercial|Residential|Appliances'	0	0	0	0	0	0	7	0	0	0	0	0	0		7			1			IMAGE		0
'Final Energy|Residential and Commercial|Residential|Cooling'	0	0	0	0	0	0	7	0	0	0	0	0	0		7			1			IMAGE		0
'Final Energy|Residential and Commercial|Residential|Electricity'	2	0	1	0	0	0	7	0	0	0	0	0	5		15			4			IMAGE		IMAGE
'Final Energy|Residential and Commercial|Residential|Gases'	2	0	1	0	0	0	7	0	0	0	0	0	5		15			4			IMAGE		IMAGE
'Final Energy|Residential and Commercial|Residential|Heat'	2	0	0	0	0	0	7	0	0	0	0	0	0		9			2			IMAGE		IMAGE
'Final Energy|Residential and Commercial|Residential|Heating'	0	0	0	0	0	0	7	0	0	0	0	0	0		7			1			IMAGE		0
'Final Energy|Residential and Commercial|Residential|Heating|Cooking'	0	0	0	0	0	0	7	0	0	0	0	0	0		7			1			IMAGE		0
'Final Energy|Residential and Commercial|Residential|Heating|Space'	0	0	0	0	0	0	7	0	0	0	0	0	0		7			1			IMAGE		0
'Final Energy|Residential and Commercial|Residential|Heating|Water'	0	0	0	0	0	0	7	0	0	0	0	0	0		7			1			IMAGE		0
'Final Energy|Residential and Commercial|Residential|Hydrogen'	0	0	1	0	0	0	7	0	0	0	0	0	0		8			2			IMAGE		IMAGE
'Final Energy|Residential and Commercial|Residential|Lighting'	0	0	0	0	0	0	7	0	0	0	0	0	0		7			1			IMAGE		0
'Final Energy|Residential and Commercial|Residential|Liquids'	2	0	1	0	0	0	7	0	0	0	0	0	5		15			4			IMAGE		IMAGE
'Final Energy|Residential and Commercial|Residential|Other'	0	0	0	0	0	0	0	0	0	0	0	0	0		0			0			0		0
'Final Energy|Residential and Commercial|Residential|Solids'	2	0	1	0	0	0	7	0	0	0	0	0	5		15			4			IMAGE		IMAGE
'Final Energy|Residential and Commercial|Residential|Solids|Biomass'	2	0	0	0	0	0	7	0	0	0	0	0	0		9			2			IMAGE		IMAGE
'Final Energy|Residential and Commercial|Residential|Solids|Biomass|Traditional'	2	0	0	0	0	0	7	0	0	0	0	0	0		9			2			IMAGE		IMAGE
'Final Energy|Residential and Commercial|Residential|Solids|Coal'	2	0	0	0	0	0	7	0	0	0	0	0	0		9			2			IMAGE		IMAGE
'Final Energy|Residential and Commercial|Solids'	3	0	1	0	5	2	7	0	15	0	38	0	5		76			8			REMIND		REMIND
'Final Energy|Residential and Commercial|Solids|Biomass'	3	0	0	0	5	2	7	0	10	0	38	0	5		70			7			REMIND		REMIND
'Final Energy|Residential and Commercial|Solids|Biomass|Traditional'	1	0	0	0	0	0	7	0	10	0	29	0	0		47			4			REMIND		REMIND
'Final Energy|Residential and Commercial|Solids|Coal'	3	0	0	0	5	2	7	0	10	0	38	0	5		70			7			REMIND		REMIND
'Final Energy|Solar'	3	0	1	0	0	0	7	0	15	4	5	0	4		39			7			MESSAGE		MESSAGE
'Final Energy|Solids'	4	0	1	0	6	2	7	0	15	4	41	0	9		89			9			REMIND		REMIND
'Final Energy|Solids|Biomass'	4	0	1	0	6	2	7	0	15	4	41	0	9		89			9			REMIND		REMIND
'Final Energy|Solids|Biomass|Traditional'	3	0	0	0	6	0	7	0	14	4	41	0	2		77			7			REMIND		REMIND
'Final Energy|Solids|Coal'	4	0	1	0	6	2	7	0	15	4	41	0	9		89			9			REMIND		REMIND
'Final Energy|Transportation'	4	0	1	0	6	2	7	0	20	4	41	0	9		94			9			REMIND		REMIND
'Final Energy|Transportation|Aviation'	1	0	0	0	0	0	0	0	0	0	0	0	0		1			1			AIM		0
'Final Energy|Transportation|Aviation|Freight'	0	0	0	0	0	0	7	0	0	0	0	0	0		7			1			IMAGE		0
'Final Energy|Transportation|Aviation|Passenger'	0	0	0	0	0	0	7	0	0	0	2	0	0		9			2			IMAGE		IMAGE
'Final Energy|Transportation|Electricity'	4	0	1	0	6	2	7	0	20	4	41	0	9		94			9			REMIND		REMIND
'Final Energy|Transportation|Freight'	2	0	1	0	5	2	7	0	0	3	13	0	5		38			8			REMIND		REMIND
'Final Energy|Transportation|Freight|Electricity'	2	0	1	0	0	0	7	0	0	0	2	0	5		17			5			IMAGE		IMAGE
'Final Energy|Transportation|Freight|Gases'	0	0	1	0	0	0	7	0	0	0	2	0	0		10			3			IMAGE		IMAGE
'Final Energy|Transportation|Freight|Gases|Bioenergy'	0	0	0	0	0	0	0	0	0	0	0	0	0		0			0			0		0
'Final Energy|Transportation|Freight|Gases|Fossil'	0	0	0	0	0	0	0	0	0	0	0	0	0		0			0			0		0
'Final Energy|Transportation|Freight|Hydrogen'	0	0	1	0	0	0	7	0	0	0	2	0	5		15			4			IMAGE		IMAGE
'Final Energy|Transportation|Freight|Liquids'	2	0	1	0	0	2	7	0	0	0	12	0	5		29			6			REMIND		REMIND
'Final Energy|Transportation|Freight|Liquids|Bioenergy'	2	0	1	0	0	2	7	0	0	0	29	0	5		46			6			REMIND		REMIND
'Final Energy|Transportation|Freight|Liquids|Fossil synfuel'	0	0	0	0	0	0	0	0	0	0	0	0	0		0			0			0		0
'Final Energy|Transportation|Freight|Liquids|Oil'	2	0	1	0	0	2	7	0	0	0	6	0	5		23			6			IMAGE		IMAGE
'Final Energy|Transportation|Freight|Other'	2	0	0	0	0	0	0	0	0	0	29	0	0		31			2			REMIND		REMIND
'Final Energy|Transportation|Gases'	3	0	1	0	5	2	7	0	17	3	34	0	5		77			9			REMIND		REMIND
'Final Energy|Transportation|Gases|Bioenergy'	0	0	0	0	0	0	0	0	0	0	2	0	0		2			1			REMIND		0
'Final Energy|Transportation|Gases|Fossil'	0	0	0	0	0	0	7	0	0	0	2	0	0		9			2			IMAGE		IMAGE
'Final Energy|Transportation|Hydrogen'	2	0	1	0	6	2	7	0	19	4	41	0	5		87			9			REMIND		REMIND
'Final Energy|Transportation|Liquids'	3	0	1	0	6	2	7	0	18	3	40	0	7		87			9			REMIND		REMIND
'Final Energy|Transportation|Liquids|Bioenergy'	2	0	1	0	0	0	0	0	9	0	29	0	5		46			5			REMIND		REMIND
'Final Energy|Transportation|Liquids|Coal'	0	0	0	0	0	2	7	0	10	0	29	0	0		48			4			REMIND		REMIND
'Final Energy|Transportation|Liquids|Fossil synfuel'	0	0	0	0	0	0	0	0	0	0	0	0	0		0			0			0		0
'Final Energy|Transportation|Liquids|Natural Gas'	0	0	0	0	0	0	7	0	0	0	0	0	0		7			1			IMAGE		0
'Final Energy|Transportation|Liquids|Oil'	3	0	1	0	0	2	7	0	13	4	36	0	5		71			8			REMIND		REMIND
'Final Energy|Transportation|Maritime'	0	0	0	0	0	0	0	0	0	0	2	0	0		2			1			REMIND		0
'Final Energy|Transportation|Other'	3	0	0	0	0	2	7	0	15	0	29	0	0		56			5			REMIND		REMIND
'Final Energy|Transportation|Passenger'	2	0	1	0	0	2	7	0	0	0	12	0	5		29			6			REMIND		REMIND
'Final Energy|Transportation|Passenger|Electricity'	2	0	1	0	0	2	7	0	0	0	29	0	5		46			6			REMIND		REMIND
'Final Energy|Transportation|Passenger|Gases'	0	0	1	0	0	0	7	0	0	0	2	0	0		10			3			IMAGE		IMAGE
'Final Energy|Transportation|Passenger|Gases|Bioenergy'	0	0	0	0	0	0	0	0	0	0	0	0	0		0			0			0		0
'Final Energy|Transportation|Passenger|Gases|Fossil'	0	0	0	0	0	0	7	0	0	0	0	0	0		7			1			IMAGE		0
'Final Energy|Transportation|Passenger|Hydrogen'	0	0	1	0	0	0	7	0	0	0	29	0	5		42			4			REMIND		REMIND
'Final Energy|Transportation|Passenger|Liquids'	2	0	1	0	0	2	7	0	0	0	12	0	5		29			6			REMIND		REMIND
'Final Energy|Transportation|Passenger|Liquids|Bioenergy'	2	0	1	0	0	2	0	0	0	0	29	0	5		39			5			REMIND		REMIND
'Final Energy|Transportation|Passenger|Liquids|Fossil synfuel'	0	0	0	0	0	0	0	0	0	0	0	0	0		0			0			0		0
'Final Energy|Transportation|Passenger|Liquids|Oil'	2	0	1	0	0	2	7	0	0	0	6	0	5		23			6			IMAGE		IMAGE
'Final Energy|Transportation|Passenger|Other'	2	0	0	0	0	0	0	0	0	0	29	0	0		31			2			REMIND		REMIND
'Final Energy|Transportation|Rail'	1	0	0	0	0	0	7	0	0	0	2	0	0		10			3			IMAGE		IMAGE
'Final Energy|Transportation|Rail|Freight'	0	0	0	0	0	0	7	0	0	0	2	0	0		9			2			IMAGE		IMAGE
'Final Energy|Transportation|Rail|Passenger'	0	0	0	0	0	0	7	0	0	0	2	0	0		9			2			IMAGE		IMAGE
'Final Energy|Transportation|Road|Freight'	0	0	0	0	0	0	7	0	0	0	2	0	0		9			2			IMAGE		IMAGE
'Final Energy|Transportation|Road|Freight|Electric'	0	0	0	0	0	0	0	0	0	0	2	0	0		2			1			REMIND		0
'Final Energy|Transportation|Road|Freight|FC'	0	0	0	0	0	0	0	0	0	0	2	0	0		2			1			REMIND		0
'Final Energy|Transportation|Road|Freight|ICE'	0	0	0	0	0	0	0	0	0	0	2	0	0		2			1			REMIND		0
'Final Energy|Transportation|Road|Passenger'	0	0	0	0	0	0	7	0	0	0	2	0	0		9			2			IMAGE		IMAGE
'Final Energy|Transportation|Road|Passenger|2W&3W'	0	0	0	0	0	0	0	0	0	0	2	0	0		2			1			REMIND		0
'Final Energy|Transportation|Road|Passenger|Bus'	0	0	0	0	0	0	7	0	0	0	2	0	0		9			2			IMAGE		IMAGE
'Final Energy|Transportation|Road|Passenger|LDV'	0	0	0	0	0	0	7	0	0	0	21	0	0		28			2			REMIND		REMIND
'Food Demand'	4	0	0	0	0	0	7	0	14	0	26	0	7		58			5			REMIND		REMIND
'Food Demand|Crops'	3	0	0	0	0	0	7	0	13	0	26	0	5		54			5			REMIND		REMIND
'Food Demand|Livestock'	3	0	0	0	0	0	7	0	13	0	26	0	5		54			5			REMIND		REMIND
'Food Energy Supply'	3	0	0	0	0	0	7	0	0	0	5	0	5		20			4			IMAGE		IMAGE
'Food Energy Supply|Livestock'	3	0	0	0	0	0	0	0	0	0	5	0	5		13			3			REMIND		REMIND
'Forcing'	2	3	0	0	5	0	7	0	2	0	36	0	0		55			6			REMIND		REMIND
'Forcing|Aerosol'	2	0	0	0	0	0	7	0	1	0	31	0	0		41			4			REMIND		REMIND
'Forcing|Aerosol|BC'	2	0	0	0	0	0	7	0	0	0	31	0	0		40			3			REMIND		REMIND
'Forcing|Aerosol|Black and Organic Carbon'	2	0	0	0	0	0	7	0	0	0	0	0	0		9			2			IMAGE		IMAGE
'Forcing|Aerosol|Cloud Indirect'	2	0	0	0	0	0	7	0	0	0	31	0	0		40			3			REMIND		REMIND
'Forcing|Aerosol|OC'	2	0	0	0	0	0	7	0	0	0	31	0	0		40			3			REMIND		REMIND
'Forcing|Aerosol|Other'	2	0	0	0	0	0	7	0	0	0	31	0	0		40			3			REMIND		REMIND
'Forcing|Aerosol|Sulfate Direct'	2	0	0	0	0	0	7	0	0	0	31	0	0		40			3			REMIND		REMIND
'Forcing|Albedo Change and Mineral Dust'	0	0	0	0	0	0	7	0	0	0	31	0	0		38			2			REMIND		REMIND
'Forcing|CH4'	2	3	0	0	0	0	7	0	1	0	31	0	0		44			5			REMIND		REMIND
'Forcing|CO2'	2	3	0	0	0	0	7	0	1	0	31	0	0		44			5			REMIND		REMIND
'Forcing|F-Gases'	2	3	0	0	0	0	7	0	1	0	31	0	0		44			5			REMIND		REMIND
'Forcing|Kyoto Gases'	2	0	0	0	0	0	7	0	1	0	36	0	0		46			4			REMIND		REMIND
'Forcing|Montreal Gases'	0	3	0	0	0	0	7	0	0	0	31	0	0		41			3			REMIND		REMIND
'Forcing|N2O'	2	3	0	0	0	0	7	0	1	0	31	0	0		44			5			REMIND		REMIND
'Forcing|Other'	2	3	0	0	0	0	7	0	0	0	31	0	0		43			4			REMIND		REMIND
'Forcing|Tropospheric Ozone'	2	0	0	0	0	0	7	0	1	0	31	0	0		41			4			REMIND		REMIND
'Forestry Demand|Roundwood'	3	0	0	0	0	0	7	0	10	0	0	0	0		20			3			MESSAGE		MESSAGE
'Forestry Demand|Roundwood|Industrial Roundwood'	3	0	0	0	0	0	7	0	10	0	0	0	0		20			3			MESSAGE		MESSAGE
'Forestry Demand|Roundwood|Wood Fuel'	3	0	0	0	0	0	7	0	10	0	0	0	0		20			3			MESSAGE		MESSAGE
'Forestry Production|Roundwood'	3	0	0	0	0	0	7	0	10	0	0	0	0		20			3			MESSAGE		MESSAGE
'Forestry Production|Roundwood|Industrial Roundwood'	3	0	0	0	0	0	7	0	10	0	0	0	0		20			3			MESSAGE		MESSAGE
'Forestry Production|Roundwood|Wood Fuel'	3	0	0	0	0	0	7	0	10	0	0	0	0		20			3			MESSAGE		MESSAGE
'GDP|MER'	4	3	0	0	5	2	7	0	19	4	40	0	7		91			9			REMIND		REMIND
'GDP|PPP'	3	3	1	0	6	0	7	0	20	4	41	0	9		94			9			REMIND		REMIND
'Human Toxicity|Electricity'	1	0	0	0	0	0	0	0	1	0	1	0	0		3			3			AIM		AIM
'Import'	0	0	0	0	0	0	0	0	0	0	0	0	0		0			0			0		0
'Import|Agriculture'	0	0	0	0	0	0	0	0	0	0	0	0	0		0			0			0		0
'Import|Energy'	0	0	0	0	0	0	0	0	0	0	0	0	5		5			1			WITCH		0
'Import|Industry'	0	0	0	0	0	0	0	0	0	0	0	0	0		0			0			0		0
'Import|Industry|Energy'	0	0	0	0	0	0	0	0	0	0	0	0	0		0			0			0		0
'Import|Industry|Energy Intensive'	0	0	0	0	0	0	0	0	0	0	0	0	0		0			0			0		0
'Import|Industry|Manufacturing'	0	0	0	0	0	0	0	0	0	0	0	0	0		0			0			0		0
'Import|Other'	0	0	0	0	0	0	0	0	0	0	0	0	0		0			0			0		0
'Interest Rate|Real'	0	0	0	0	0	0	0	0	0	0	25	0	0		25			1			REMIND		0
'Investment'	0	0	1	0	0	2	7	0	0	0	29	0	5		44			5			REMIND		REMIND
'Investment|Energy Demand|Transportation|Freight|Road|HDT|EV'	0	0	0	0	0	0	0	0	0	0	0	0	5		5			1			WITCH		0
'Investment|Energy Demand|Transportation|Freight|Road|HDT|ICE'	0	0	0	0	0	0	0	0	0	0	0	0	5		5			1			WITCH		0
'Investment|Energy Demand|Transportation|Passenger|Road|LDV|EV'	0	0	0	0	0	0	0	0	0	0	0	0	5		5			1			WITCH		0
'Investment|Energy Demand|Transportation|Passenger|Road|LDV|FCV'	0	0	0	0	0	0	0	0	0	0	0	0	5		5			1			WITCH		0
'Investment|Energy Demand|Transportation|Passenger|Road|LDV|ICE'	0	0	0	0	0	0	0	0	0	0	0	0	5		5			1			WITCH		0
'Investment|Energy Efficiency'	1	0	0	0	0	0	0	0	1	0	0	0	7		9			3			WITCH		WITCH
'Investment|Energy Supply'	4	0	1	0	0	2	7	0	16	1	39	0	7		77			8			REMIND		REMIND
'Investment|Energy Supply|CO2 Transport and Storage'	2	0	1	0	0	0	7	0	10	0	23	0	5		48			6			REMIND		REMIND
'Investment|Energy Supply|Electricity'	3	0	1	0	0	2	7	0	10	1	24	0	5		53			8			REMIND		REMIND
'Investment|Energy Supply|Electricity|Biomass'	3	0	0	0	0	2	7	0	10	0	21	0	5		48			6			REMIND		REMIND
'Investment|Energy Supply|Electricity|Biomass|w/ CCS'	4	0	0	0	0	2	7	0	10	0	21	0	7		51			6			REMIND		REMIND
'Investment|Energy Supply|Electricity|Biomass|w/o CCS'	4	0	0	0	0	2	7	0	10	0	21	0	7		51			6			REMIND		REMIND
'Investment|Energy Supply|Electricity|Coal'	3	0	0	0	0	2	7	0	10	0	21	0	5		48			6			REMIND		REMIND
'Investment|Energy Supply|Electricity|Coal|w/ CCS'	4	0	0	0	0	2	7	0	10	0	21	0	7		51			6			REMIND		REMIND
'Investment|Energy Supply|Electricity|Coal|w/o CCS'	4	0	0	0	0	2	7	0	10	0	21	0	7		51			6			REMIND		REMIND
'Investment|Energy Supply|Electricity|Electricity Storage'	3	0	0	0	0	0	0	0	10	0	21	0	5		39			4			REMIND		REMIND
'Investment|Energy Supply|Electricity|Fossil'	3	0	0	0	0	2	7	0	10	1	22	0	5		50			7			REMIND		REMIND
'Investment|Energy Supply|Electricity|Gas'	3	0	0	0	0	2	7	0	10	0	21	0	5		48			6			REMIND		REMIND
'Investment|Energy Supply|Electricity|Gas|w/ CCS'	4	0	0	0	0	2	7	0	10	0	21	0	7		51			6			REMIND		REMIND
'Investment|Energy Supply|Electricity|Gas|w/o CCS'	4	0	0	0	0	2	7	0	10	0	21	0	7		51			6			REMIND		REMIND
'Investment|Energy Supply|Electricity|Geothermal'	4	0	0	0	0	2	0	0	11	0	12	0	2		31			5			REMIND		REMIND
'Investment|Energy Supply|Electricity|Hydro'	4	0	0	0	0	2	7	0	11	0	21	0	7		52			6			REMIND		REMIND
'Investment|Energy Supply|Electricity|Non-Biomass Renewables'	4	0	0	0	0	2	7	0	11	0	21	0	7		52			6			REMIND		REMIND
'Investment|Energy Supply|Electricity|Non-fossil'	3	0	0	0	0	2	7	0	9	1	12	0	5		39			7			REMIND		REMIND
'Investment|Energy Supply|Electricity|Nuclear'	4	0	0	0	0	2	7	0	11	0	21	0	7		52			6			REMIND		REMIND
'Investment|Energy Supply|Electricity|Ocean'	0	0	0	0	0	0	0	0	0	0	0	0	0		0			0			0		0
'Investment|Energy Supply|Electricity|Oil'	3	0	0	0	0	2	7	0	10	0	9	0	5		36			6			MESSAGE		MESSAGE
'Investment|Energy Supply|Electricity|Oil|w/ CCS'	3	0	0	0	0	0	7	0	0	0	0	0	0		10			2			IMAGE		IMAGE
'Investment|Energy Supply|Electricity|Oil|w/o CCS'	4	0	0	0	0	2	7	0	10	0	21	0	7		51			6			REMIND		REMIND
'Investment|Energy Supply|Electricity|Other'	3	0	0	0	0	0	7	0	10	0	0	0	0		20			3			MESSAGE		MESSAGE
'Investment|Energy Supply|Electricity|Renewables (incl. Biomass)'	4	0	0	0	0	2	7	0	11	0	21	0	7		52			6			REMIND		REMIND
'Investment|Energy Supply|Electricity|Solar'	4	0	0	0	0	2	7	0	11	0	21	0	7		52			6			REMIND		REMIND
'Investment|Energy Supply|Electricity|Transmission and Distribution'	4	0	0	0	0	0	7	0	11	0	21	0	7		50			5			REMIND		REMIND
'Investment|Energy Supply|Electricity|Wind'	4	0	0	0	0	2	7	0	11	0	21	0	7		52			6			REMIND		REMIND
'Investment|Energy Supply|Extraction|Bioenergy'	3	0	0	0	0	0	7	0	0	0	0	0	0		10			2			IMAGE		IMAGE
'Investment|Energy Supply|Extraction|Coal'	3	0	1	0	0	0	7	0	10	0	0	0	0		21			4			MESSAGE		MESSAGE
'Investment|Energy Supply|Extraction|Fossil'	4	0	0	0	0	0	7	0	10	1	0	0	7		29			5			MESSAGE		MESSAGE
'Investment|Energy Supply|Extraction|Gas'	3	0	1	0	0	0	7	0	10	0	0	0	0		21			4			MESSAGE		MESSAGE
'Investment|Energy Supply|Extraction|Oil'	3	0	1	0	0	0	7	0	10	0	0	0	5		26			5			MESSAGE		MESSAGE
'Investment|Energy Supply|Extraction|Uranium'	0	0	1	0	0	0	7	0	10	0	0	0	0		18			3			MESSAGE		MESSAGE
'Investment|Energy Supply|Heat'	3	0	0	0	0	0	7	0	10	0	23	0	0		43			4			REMIND		REMIND
'Investment|Energy Supply|Hydrogen'	0	0	1	0	0	0	0	0	10	0	23	0	5		39			4			REMIND		REMIND
'Investment|Energy Supply|Hydrogen|Biomass'	0	0	0	0	0	0	0	0	0	0	0	0	0		0			0			0		0
'Investment|Energy Supply|Hydrogen|Electricity'	0	0	0	0	0	0	0	0	0	0	0	0	0		0			0			0		0
'Investment|Energy Supply|Hydrogen|Fossil'	1	0	0	0	0	0	0	0	11	0	21	0	7		40			4			REMIND		REMIND
'Investment|Energy Supply|Hydrogen|Other'	1	0	0	0	0	0	0	0	11	0	0	0	2		14			3			MESSAGE		MESSAGE
'Investment|Energy Supply|Hydrogen|Renewable'	0	0	0	0	0	0	0	0	10	0	12	0	5		27			3			REMIND		REMIND
'Investment|Energy Supply|Liquids'	3	0	1	0	0	0	7	0	10	0	23	0	0		44			5			REMIND		REMIND
'Investment|Energy Supply|Liquids|Biomass'	3	0	0	0	0	0	7	0	10	0	23	0	0		43			4			REMIND		REMIND
'Investment|Energy Supply|Liquids|Coal and Gas'	0	0	0	0	0	0	0	0	10	0	23	0	0		33			2			REMIND		REMIND
'Investment|Energy Supply|Liquids|Oil'	3	0	0	0	0	0	7	0	10	0	23	0	0		43			4			REMIND		REMIND
'Investment|Energy Supply|Other'	0	0	0	0	0	0	0	0	10	0	2	0	0		12			2			MESSAGE		MESSAGE
'Investment|Infrastructure|Residential and Commercial|Building Retrofits'	0	0	0	0	0	0	0	0	0	0	0	0	0		0			0			0		0
'Investment|Infrastructure|Residential and Commercial|High-Efficiency Buildings'	0	0	0	0	0	0	0	0	0	0	0	0	0		0			0			0		0
'Investment|Infrastructure|Transportation'	0	0	0	0	0	0	0	0	0	0	0	0	5		5			1			WITCH		0
'Investment|RnD|Energy Supply'	0	0	0	0	0	0	0	0	0	0	0	0	5		5			1			WITCH		0
'Land Cover'	4	0	1	0	0	0	7	0	19	4	25	0	7		67			7			REMIND		REMIND
'Land Cover|Built-up Area'	4	0	0	0	6	0	7	0	0	3	26	0	0		46			5			REMIND		REMIND
'Land Cover|Cropland'	4	0	1	0	6	0	7	0	20	1	26	0	7		72			8			REMIND		REMIND
'Land Cover|Cropland|Cereals'	1	0	0	0	0	0	7	0	0	0	24	0	5		37			4			REMIND		REMIND
'Land Cover|Cropland|Energy Crops'	3	0	0	0	6	0	7	0	14	0	26	0	5		61			6			REMIND		REMIND
'Land Cover|Cropland|Energy Crops|2nd generation'	0	0	0	0	0	0	0	0	0	0	9	0	0		9			1			REMIND		0
'Land Cover|Cropland|Energy Crops|Irrigated'	0	0	0	0	0	0	7	0	0	0	17	0	0		24			2			REMIND		REMIND
'Land Cover|Cropland|Irrigated'	2	0	0	0	0	0	7	0	10	0	24	0	5		48			5			REMIND		REMIND
'Land Cover|Cropland|Rainfed'	2	0	0	0	0	0	7	0	0	0	19	0	0		28			3			REMIND		REMIND
'Land Cover|Forest'	4	0	1	0	6	0	7	0	20	4	26	0	7		75			8			REMIND		REMIND
'Land Cover|Forest|Afforestation and Reforestation'	0	0	0	0	0	0	7	0	10	0	24	0	5		46			4			REMIND		REMIND
'Land Cover|Forest|Forestry|Harvested Area'	3	0	0	0	0	0	7	0	0	0	0	0	0		10			2			IMAGE		IMAGE
'Land Cover|Forest|Managed'	0	0	0	0	5	0	7	0	0	0	24	0	5		41			4			REMIND		REMIND
'Land Cover|Forest|Natural Forest'	3	0	0	0	5	0	7	0	10	0	24	0	5		54			6			REMIND		REMIND
'Land Cover|Forest|Secondary'	0	0	0	0	0	0	0	0	0	0	9	0	0		9			1			REMIND		0
'Land Cover|Other Arable Land'	3	0	0	0	0	0	7	0	0	0	5	0	0		15			3			IMAGE		IMAGE
'Land Cover|Other Land'	3	0	1	0	5	0	7	0	14	0	24	0	5		59			7			REMIND		REMIND
'Land Cover|Pasture'	4	0	1	0	6	0	7	0	20	1	26	0	7		72			8			REMIND		REMIND
'Lifetime|Electricity|Biomass|w/ CCS'	0	0	0	0	0	0	0	0	0	0	29	0	5		34			2			REMIND		REMIND
'Lifetime|Electricity|Biomass|w/o CCS'	0	0	0	0	0	0	0	0	0	0	29	0	5		34			2			REMIND		REMIND
'Lifetime|Electricity|Coal|w/ CCS'	0	0	0	0	0	0	0	0	0	0	29	0	5		34			2			REMIND		REMIND
'Lifetime|Electricity|Coal|w/o CCS'	0	0	0	0	0	0	0	0	0	0	29	0	5		34			2			REMIND		REMIND
'Lifetime|Electricity|Gas|w/ CCS'	0	0	0	0	0	0	0	0	0	0	29	0	5		34			2			REMIND		REMIND
'Lifetime|Electricity|Gas|w/o CCS'	0	0	0	0	0	0	0	0	0	0	29	0	5		34			2			REMIND		REMIND
'Lifetime|Electricity|Geothermal'	0	0	0	0	0	0	0	0	7	0	29	0	0		36			2			REMIND		REMIND
'Lifetime|Electricity|Hydro'	0	0	0	0	0	0	0	0	7	0	29	0	5		41			3			REMIND		REMIND
'Lifetime|Electricity|Nuclear'	0	0	0	0	0	0	0	0	7	0	29	0	5		41			3			REMIND		REMIND
'Lifetime|Electricity|Solar|CSP'	0	0	0	0	0	0	0	0	0	0	29	0	5		34			2			REMIND		REMIND
'Lifetime|Electricity|Solar|PV'	0	0	0	0	0	0	0	0	7	0	29	0	5		41			3			REMIND		REMIND
'Lifetime|Electricity|Wind'	0	0	0	0	0	0	0	0	0	0	25	0	5		30			2			REMIND		REMIND
'Lifetime|Electricity|Wind|Offshore'	0	0	0	0	0	0	0	0	7	0	4	0	5		16			3			MESSAGE		MESSAGE
'Lifetime|Electricity|Wind|Onshore'	0	0	0	0	0	0	0	0	7	0	4	0	5		16			3			MESSAGE		MESSAGE
'Lifetime|Gases|Biomass|w/o CCS'	0	0	0	0	0	0	0	0	7	0	29	0	0		36			2			REMIND		REMIND
'Lifetime|Gases|Coal|w/o CCS'	0	0	0	0	0	0	0	0	7	0	29	0	0		36			2			REMIND		REMIND
'Lifetime|Hydrogen|Biomass|w/ CCS'	0	0	0	0	0	0	0	0	7	0	29	0	0		36			2			REMIND		REMIND
'Lifetime|Hydrogen|Biomass|w/o CCS'	0	0	0	0	0	0	0	0	7	0	29	0	0		36			2			REMIND		REMIND
'Lifetime|Hydrogen|Coal|w/ CCS'	0	0	0	0	0	0	0	0	7	0	29	0	0		36			2			REMIND		REMIND
'Lifetime|Hydrogen|Coal|w/o CCS'	0	0	0	0	0	0	0	0	7	0	29	0	0		36			2			REMIND		REMIND
'Lifetime|Hydrogen|Electricity'	0	0	0	0	0	0	0	0	7	0	29	0	0		36			2			REMIND		REMIND
'Lifetime|Hydrogen|Gas|w/ CCS'	0	0	0	0	0	0	0	0	7	0	29	0	0		36			2			REMIND		REMIND
'Lifetime|Hydrogen|Gas|w/o CCS'	0	0	0	0	0	0	0	0	7	0	29	0	0		36			2			REMIND		REMIND
'Lifetime|Liquids|Biomass|w/ CCS'	0	0	0	0	0	0	0	0	7	0	29	0	0		36			2			REMIND		REMIND
'Lifetime|Liquids|Biomass|w/o CCS'	0	0	0	0	0	0	0	0	7	0	29	0	0		36			2			REMIND		REMIND
'Lifetime|Liquids|Coal|w/ CCS'	0	0	0	0	0	0	0	0	7	0	29	0	0		36			2			REMIND		REMIND
'Lifetime|Liquids|Coal|w/o CCS'	0	0	0	0	0	0	0	0	7	0	29	0	0		36			2			REMIND		REMIND
'Lifetime|Liquids|Gas|w/ CCS'	0	0	0	0	0	0	0	0	7	0	0	0	0		7			1			MESSAGE		0
'Lifetime|Liquids|Gas|w/o CCS'	0	0	0	0	0	0	0	0	7	0	0	0	0		7			1			MESSAGE		0
'Lifetime|Liquids|Oil'	0	0	0	0	0	0	0	0	0	0	29	0	0		29			1			REMIND		0
'Material recycling|Chemicals'	0	0	0	0	0	0	7	0	0	0	0	0	0		7			1			IMAGE		0
'Material recycling|Plastics'	0	0	0	0	0	0	7	0	0	0	0	0	0		7			1			IMAGE		0
'OM Cost|Fixed|Electricity|Biomass|w/ CCS'	1	0	0	0	0	0	0	0	0	0	29	0	5		35			3			REMIND		REMIND
'OM Cost|Fixed|Electricity|Biomass|w/o CCS'	3	0	0	0	0	0	0	0	0	0	29	0	5		37			3			REMIND		REMIND
'OM Cost|Fixed|Electricity|Coal|w/ CCS'	1	0	0	0	0	0	0	0	0	0	29	0	5		35			3			REMIND		REMIND
'OM Cost|Fixed|Electricity|Coal|w/o CCS'	3	0	0	0	0	0	0	0	0	0	29	0	5		37			3			REMIND		REMIND
'OM Cost|Fixed|Electricity|Gas|w/ CCS'	1	0	0	0	0	0	0	0	0	0	29	0	5		35			3			REMIND		REMIND
'OM Cost|Fixed|Electricity|Gas|w/o CCS'	3	0	0	0	0	0	0	0	0	0	29	0	5		37			3			REMIND		REMIND
'OM Cost|Fixed|Electricity|Geothermal'	3	0	0	0	0	0	0	0	7	0	29	0	0		39			3			REMIND		REMIND
'OM Cost|Fixed|Electricity|Hydro'	3	0	0	0	0	0	0	0	7	0	29	0	5		44			4			REMIND		REMIND
'OM Cost|Fixed|Electricity|Nuclear'	3	0	0	0	0	0	0	0	7	0	29	0	5		44			4			REMIND		REMIND
'OM Cost|Fixed|Electricity|Solar|CSP'	0	0	0	0	0	0	0	0	0	0	29	0	5		34			2			REMIND		REMIND
'OM Cost|Fixed|Electricity|Solar|PV'	3	0	0	0	0	0	0	0	7	0	29	0	5		44			4			REMIND		REMIND
'OM Cost|Fixed|Electricity|Wind'	3	0	0	0	0	0	0	0	0	0	25	0	5		33			3			REMIND		REMIND
'OM Cost|Fixed|Electricity|Wind|Offshore'	0	0	0	0	0	0	0	0	7	0	4	0	5		16			3			MESSAGE		MESSAGE
'OM Cost|Fixed|Electricity|Wind|Onshore'	3	0	0	0	0	0	0	0	7	0	4	0	5		19			4			MESSAGE		MESSAGE
'OM Cost|Fixed|Gases|Biomass|w/o CCS'	0	0	0	0	0	0	0	0	7	0	29	0	0		36			2			REMIND		REMIND
'OM Cost|Fixed|Gases|Coal|w/o CCS'	0	0	0	0	0	0	0	0	7	0	29	0	0		36			2			REMIND		REMIND
'OM Cost|Fixed|Hydrogen|Biomass|w/ CCS'	0	0	0	0	0	0	0	0	7	0	29	0	0		36			2			REMIND		REMIND
'OM Cost|Fixed|Hydrogen|Biomass|w/o CCS'	0	0	0	0	0	0	0	0	7	0	29	0	0		36			2			REMIND		REMIND
'OM Cost|Fixed|Hydrogen|Coal|w/ CCS'	0	0	0	0	0	0	0	0	7	0	29	0	0		36			2			REMIND		REMIND
'OM Cost|Fixed|Hydrogen|Coal|w/o CCS'	0	0	0	0	0	0	0	0	7	0	29	0	0		36			2			REMIND		REMIND
'OM Cost|Fixed|Hydrogen|Electricity'	0	0	0	0	0	0	0	0	7	0	29	0	0		36			2			REMIND		REMIND
'OM Cost|Fixed|Hydrogen|Gas|w/ CCS'	0	0	0	0	0	0	0	0	7	0	29	0	0		36			2			REMIND		REMIND
'OM Cost|Fixed|Hydrogen|Gas|w/o CCS'	0	0	0	0	0	0	0	0	7	0	29	0	0		36			2			REMIND		REMIND
'OM Cost|Fixed|Liquids|Biomass|w/ CCS'	3	0	0	0	0	0	0	0	7	0	29	0	0		39			3			REMIND		REMIND
'OM Cost|Fixed|Liquids|Biomass|w/o CCS'	3	0	0	0	0	0	0	0	7	0	29	0	0		39			3			REMIND		REMIND
'OM Cost|Fixed|Liquids|Coal|w/ CCS'	0	0	0	0	0	0	0	0	7	0	29	0	0		36			2			REMIND		REMIND
'OM Cost|Fixed|Liquids|Coal|w/o CCS'	0	0	0	0	0	0	0	0	7	0	29	0	0		36			2			REMIND		REMIND
'OM Cost|Fixed|Liquids|Gas|w/ CCS'	0	0	0	0	0	0	0	0	7	0	0	0	0		7			1			MESSAGE		0
'OM Cost|Fixed|Liquids|Gas|w/o CCS'	0	0	0	0	0	0	0	0	7	0	0	0	0		7			1			MESSAGE		0
'OM Cost|Fixed|Liquids|Oil'	3	0	0	0	0	0	0	0	0	0	29	0	0		32			2			REMIND		REMIND
'Policy Cost|Additional Total Energy System Cost'	0	0	1	0	0	0	0	0	0	0	29	0	7		37			3			REMIND		REMIND
'Policy Cost|Area under MAC Curve'	0	0	0	0	0	0	7	0	0	4	0	0	0		11			2			IMAGE		IMAGE
'Policy Cost|Consumption Loss'	4	0	0	0	0	2	0	0	5	0	38	0	7		56			5			REMIND		REMIND
'Policy Cost|Default for CAV'	0	0	0	0	0	0	7	0	0	0	0	0	5		12			2			IMAGE		IMAGE
'Policy Cost|Equivalent Variation'	0	0	0	0	0	0	0	0	0	0	0	0	0		0			0			0		0
'Policy Cost|GDP Loss'	4	0	1	0	0	2	0	0	5	0	40	0	7		59			6			REMIND		REMIND
'Policy Cost|Other'	0	0	0	0	0	0	0	0	0	0	6	0	0		6			1			REMIND		0
'Policy Cost|Welfare Change'	0	0	0	0	0	0	0	0	0	0	0	0	5		5			1			WITCH		0
'Population'	4	3	0	0	6	2	7	0	20	4	41	0	9		96			9			REMIND		REMIND
'Population|Electricity Access'	0	0	0	0	0	0	7	0	0	0	0	0	0		7			1			IMAGE		0
'Population|Extreme poverty'	0	0	0	0	0	0	0	0	0	0	3	0	0		3			1			REMIND		0
'Population|Female'	0	0	0	0	0	0	0	0	0	0	0	0	0		0			0			0		0
'Population|Male'	0	0	0	0	0	0	0	0	0	0	0	0	0		0			0			0		0
'Population|Relying on Solid Fuels'	1	0	0	0	0	0	7	0	1	0	1	0	0		10			4			IMAGE		IMAGE
'Population|Risk of Hunger'	4	0	0	0	0	0	0	0	1	0	17	0	0		22			3			REMIND		REMIND
'Population|Rural'	0	0	0	0	0	0	7	0	10	0	0	0	0		17			2			MESSAGE		MESSAGE
'Population|Urban'	0	0	0	0	0	0	7	0	10	3	3	0	0		23			4			MESSAGE		MESSAGE
'Population|Urban|Share'	0	0	0	0	0	0	0	0	0	0	0	0	0		0			0			0		0
'Population|Working Age'	0	0	0	0	0	0	0	0	0	0	0	0	0		0			0			0		0
'Premature Deaths|PM2.5'	0	0	0	0	0	0	0	0	0	0	3	0	0		3			1			REMIND		0
'Price|Agriculture|Corn|Index'	3	0	0	0	0	0	0	0	0	0	1	0	0		4			2			AIM		AIM
'Price|Agriculture|Livestock|Index'	0	0	0	0	0	0	7	0	0	0	1	0	0		8			2			IMAGE		IMAGE
'Price|Agriculture|Non-Energy Crops and Livestock|Index'	4	0	0	0	0	0	7	0	3	0	19	0	5		38			5			REMIND		REMIND
'Price|Agriculture|Non-Energy Crops|Index'	3	0	0	0	0	0	7	0	2	0	1	0	5		18			5			IMAGE		IMAGE
'Price|Agriculture|Rice|Index'	0	0	0	0	0	0	1	0	0	0	0	0	0		1			1			IMAGE		0
'Price|Agriculture|Soybean|Index'	3	0	0	0	0	0	1	0	0	0	1	0	0		5			3			AIM		AIM
'Price|Agriculture|Wheat|Index'	3	0	0	0	0	0	1	0	0	0	1	0	0		5			3			AIM		AIM
'Price|Carbon'	3	0	1	0	1	2	7	0	20	4	40	0	9		87			9			REMIND		REMIND
'Price|Final Energy|Residential and Commercial|Residential|Electricity'	0	0	0	0	0	0	0	0	10	0	33	0	5		48			3			REMIND		REMIND
'Price|Final Energy|Residential and Commercial|Residential|Gases|Natural Gas'	0	0	0	0	0	0	0	0	10	0	33	0	0		43			2			REMIND		REMIND
'Price|Final Energy|Residential and Commercial|Residential|Liquids|Biomass'	0	0	0	0	0	0	0	0	9	0	4	0	0		13			2			MESSAGE		MESSAGE
'Price|Final Energy|Residential and Commercial|Residential|Liquids|Oil'	0	0	0	0	0	0	0	0	10	0	33	0	0		43			2			REMIND		REMIND
'Price|Final Energy|Residential and Commercial|Residential|Solids|Biomass'	0	0	0	0	0	0	0	0	9	0	33	0	0		42			2			REMIND		REMIND
'Price|Final Energy|Residential and Commercial|Residential|Solids|Coal'	0	0	0	0	0	0	0	0	10	0	33	0	0		43			2			REMIND		REMIND
'Price|Final Energy|Transportation|Electricity'	0	0	0	0	0	0	0	0	0	0	21	0	0		21			1			REMIND		0
'Price|Final Energy|Transportation|Gases'	0	0	0	0	0	0	0	0	0	0	2	0	0		2			1			REMIND		0
'Price|Final Energy|Transportation|Hydrogen'	0	0	0	0	0	0	0	0	0	0	21	0	0		21			1			REMIND		0
'Price|Final Energy|Transportation|Liquids'	0	0	0	0	0	0	0	0	0	0	25	0	0		25			1			REMIND		0
'Price|Final Energy|Transportation|Liquids|Bioenergy'	0	0	0	0	0	0	0	0	0	0	4	0	0		4			1			REMIND		0
'Price|Primary Energy|Biomass'	3	0	0	0	0	0	0	0	9	1	39	0	5		57			5			REMIND		REMIND
'Price|Primary Energy|Coal'	3	0	0	0	0	0	7	0	9	1	39	0	5		64			6			REMIND		REMIND
'Price|Primary Energy|Gas'	3	0	0	0	0	0	7	0	9	1	39	0	5		64			6			REMIND		REMIND
'Price|Primary Energy|Oil'	3	0	0	0	0	0	7	0	9	1	39	0	5		64			6			REMIND		REMIND
'Price|Secondary Energy|Electricity'	3	0	0	0	0	0	7	0	9	0	39	0	5		63			5			REMIND		REMIND
'Price|Secondary Energy|Gases|Natural Gas'	0	0	0	0	0	0	7	0	0	0	38	0	5		50			3			REMIND		REMIND
'Price|Secondary Energy|Hydrogen'	0	0	0	0	0	0	0	0	9	0	38	0	0		47			2			REMIND		REMIND
'Price|Secondary Energy|Liquids'	3	0	0	0	0	0	0	0	9	0	39	0	0		51			3			REMIND		REMIND
'Price|Secondary Energy|Liquids|Biomass'	3	0	0	0	0	0	0	0	9	0	38	0	5		55			4			REMIND		REMIND
'Price|Secondary Energy|Liquids|Oil'	0	0	0	0	0	0	7	0	9	0	34	0	5		55			4			REMIND		REMIND
'Price|Secondary Energy|Solids|Biomass'	0	0	0	0	0	0	7	0	0	0	0	0	0		7			1			IMAGE		0
'Price|Secondary Energy|Solids|Coal'	0	0	0	0	0	0	7	0	0	0	17	0	5		29			3			REMIND		REMIND
'Primary Energy'	4	0	1	0	6	2	7	0	20	4	41	0	9		94			9			REMIND		REMIND
'Primary Energy|Biomass'	4	0	1	0	6	2	7	0	20	4	41	0	9		94			9			REMIND		REMIND
'Primary Energy|Biomass|1st Generation'	3	0	0	0	5	0	7	0	9	0	28	0	0		52			5			REMIND		REMIND
'Primary Energy|Biomass|Electricity'	3	0	0	0	0	2	7	0	11	3	38	0	0		64			6			REMIND		REMIND
'Primary Energy|Biomass|Electricity|w/ CCS'	3	0	0	0	0	2	7	0	11	3	22	0	0		48			6			REMIND		REMIND
'Primary Energy|Biomass|Electricity|w/o CCS'	3	0	0	0	0	2	7	0	11	3	22	0	0		48			6			REMIND		REMIND
'Primary Energy|Biomass|Energy Crops'	3	0	0	0	0	0	7	0	9	0	28	0	0		47			4			REMIND		REMIND
'Primary Energy|Biomass|Gases'	0	0	0	0	0	0	0	0	7	0	24	0	0		31			2			REMIND		REMIND
'Primary Energy|Biomass|Hydrogen'	0	0	0	0	0	0	7	0	7	0	24	0	0		38			3			REMIND		REMIND
'Primary Energy|Biomass|Liquids'	3	0	0	0	0	0	7	0	7	0	24	0	0		41			4			REMIND		REMIND
'Primary Energy|Biomass|Modern'	3	0	0	0	5	2	7	0	12	4	38	0	5		76			8			REMIND		REMIND
'Primary Energy|Biomass|Modern|w/ CCS'	1	0	1	0	6	0	7	0	11	3	35	0	9		73			8			REMIND		REMIND
'Primary Energy|Biomass|Modern|w/o CCS'	1	0	1	0	6	0	7	0	11	3	26	0	9		64			8			REMIND		REMIND
'Primary Energy|Biomass|Residues'	3	0	0	0	0	0	7	0	9	0	28	0	0		47			4			REMIND		REMIND
'Primary Energy|Biomass|Solids'	3	0	0	0	0	0	7	0	7	0	24	0	0		41			4			REMIND		REMIND
'Primary Energy|Biomass|Traditional'	3	0	0	0	6	2	7	0	11	1	38	0	7		75			8			REMIND		REMIND
'Primary Energy|Coal'	4	0	1	0	6	2	7	0	20	4	41	0	9		94			9			REMIND		REMIND
'Primary Energy|Coal|Electricity'	3	0	0	0	0	2	7	0	9	0	37	0	0		58			5			REMIND		REMIND
'Primary Energy|Coal|Electricity|w/ CCS'	3	0	0	0	0	2	7	0	9	0	21	0	0		42			5			REMIND		REMIND
'Primary Energy|Coal|Electricity|w/o CCS'	3	0	0	0	0	2	7	0	9	0	21	0	0		42			5			REMIND		REMIND
'Primary Energy|Coal|Gases'	0	0	0	0	0	0	0	0	7	0	24	0	0		31			2			REMIND		REMIND
'Primary Energy|Coal|Hydrogen'	0	0	0	0	0	0	7	0	7	0	24	0	0		38			3			REMIND		REMIND
'Primary Energy|Coal|Liquids'	0	0	0	0	0	0	0	0	7	0	24	0	0		31			2			REMIND		REMIND
'Primary Energy|Coal|Solids'	0	0	0	0	0	0	0	0	7	0	24	0	0		31			2			REMIND		REMIND
'Primary Energy|Coal|w/ CCS'	4	0	1	0	6	2	7	0	14	4	40	0	9		87			9			REMIND		REMIND
'Primary Energy|Coal|w/o CCS'	4	0	1	0	6	2	7	0	14	4	40	0	9		87			9			REMIND		REMIND
'Primary Energy|Fossil'	4	0	1	0	6	2	7	0	20	4	41	0	9		94			9			REMIND		REMIND
'Primary Energy|Fossil|w/ CCS'	3	0	1	0	1	2	7	0	13	1	41	0	7		76			9			REMIND		REMIND
'Primary Energy|Fossil|w/o CCS'	3	0	1	0	1	2	7	0	13	4	41	0	7		79			9			REMIND		REMIND
'Primary Energy|Gas'	4	0	1	0	6	2	7	0	20	4	41	0	9		94			9			REMIND		REMIND
'Primary Energy|Gas|Electricity'	3	0	0	0	0	2	7	0	9	0	38	0	0		59			5			REMIND		REMIND
'Primary Energy|Gas|Electricity|w/ CCS'	3	0	0	0	0	2	7	0	9	0	21	0	0		42			5			REMIND		REMIND
'Primary Energy|Gas|Electricity|w/o CCS'	3	0	0	0	0	2	7	0	9	0	21	0	0		42			5			REMIND		REMIND
'Primary Energy|Gas|Gases'	0	0	0	0	0	0	0	0	7	0	25	0	0		32			2			REMIND		REMIND
'Primary Energy|Gas|Hydrogen'	0	0	0	0	0	0	7	0	7	0	25	0	5		44			4			REMIND		REMIND
'Primary Energy|Gas|Liquids'	0	0	0	0	0	0	0	0	7	0	25	0	0		32			2			REMIND		REMIND
'Primary Energy|Gas|Solids'	0	0	0	0	0	0	0	0	7	0	0	0	0		7			1			MESSAGE		0
'Primary Energy|Gas|w/ CCS'	4	0	1	0	6	2	7	0	14	4	41	0	9		88			9			REMIND		REMIND
'Primary Energy|Gas|w/o CCS'	4	0	1	0	6	2	7	0	14	4	41	0	9		88			9			REMIND		REMIND
'Primary Energy|Geothermal'	4	0	1	0	1	2	0	0	17	3	32	0	2		62			8			REMIND		REMIND
'Primary Energy|Hydro'	4	0	1	0	1	2	7	0	17	3	32	0	9		76			9			REMIND		REMIND
'Primary Energy|Non-Biomass Renewables'	4	0	1	0	6	2	7	0	20	4	41	0	9		94			9			REMIND		REMIND
'Primary Energy|Non-Biomass Renewables|Geothermal'	0	0	0	0	5	0	0	0	2	0	8	0	0		15			3			REMIND		REMIND
'Primary Energy|Non-Biomass Renewables|Hydro'	0	0	0	0	5	0	7	0	2	0	8	0	0		22			4			REMIND		REMIND
'Primary Energy|Non-Biomass Renewables|Ocean'	0	0	0	0	0	0	0	0	2	0	0	0	0		2			1			MESSAGE		0
'Primary Energy|Non-Biomass Renewables|Solar'	0	0	0	0	5	0	7	0	2	0	8	0	0		22			4			REMIND		REMIND
'Primary Energy|Non-Biomass Renewables|Wind'	0	0	0	0	5	0	7	0	2	0	8	0	0		22			4			REMIND		REMIND
'Primary Energy|Nuclear'	4	0	1	0	6	2	7	0	20	4	41	0	9		94			9			REMIND		REMIND
'Primary Energy|Ocean'	0	0	0	0	0	2	0	0	12	3	0	0	0		17			3			MESSAGE		MESSAGE
'Primary Energy|Oil'	4	0	1	0	6	2	7	0	20	4	41	0	9		94			9			REMIND		REMIND
'Primary Energy|Oil|Electricity'	3	0	0	0	0	2	7	0	9	0	8	0	5		34			6			MESSAGE		MESSAGE
'Primary Energy|Oil|Electricity|w/ CCS'	3	0	0	0	0	2	7	0	9	0	8	0	0		29			5			MESSAGE		MESSAGE
'Primary Energy|Oil|Electricity|w/o CCS'	3	0	0	0	0	2	7	0	9	0	8	0	0		29			5			MESSAGE		MESSAGE
'Primary Energy|Oil|Gases'	0	0	0	0	0	0	0	0	7	0	0	0	0		7			1			MESSAGE		0
'Primary Energy|Oil|Hydrogen'	0	0	0	0	0	0	7	0	7	0	0	0	0		14			2			IMAGE		IMAGE
'Primary Energy|Oil|Liquids'	0	0	0	0	0	0	0	0	7	0	0	0	0		7			1			MESSAGE		0
'Primary Energy|Oil|Solids'	0	0	0	0	0	0	0	0	7	0	0	0	0		7			1			MESSAGE		0
'Primary Energy|Oil|w/ CCS'	4	0	1	0	6	2	7	0	0	3	5	0	0		28			7			IMAGE		IMAGE
'Primary Energy|Oil|w/o CCS'	4	0	1	0	6	2	7	0	14	4	40	0	9		87			9			REMIND		REMIND
'Primary Energy|Other'	4	0	0	0	0	2	7	0	18	0	0	0	2		33			5			MESSAGE		MESSAGE
'Primary Energy|Renewables (incl. Biomass)'	4	0	1	0	6	2	7	0	20	4	41	0	9		94			9			REMIND		REMIND
'Primary Energy|Secondary Energy Trade'	3	0	0	0	0	0	0	0	13	4	0	0	0		20			3			MESSAGE		MESSAGE
'Primary Energy|Solar'	4	0	1	0	1	2	7	0	17	3	32	0	9		76			9			REMIND		REMIND
'Primary Energy|Wind'	4	0	1	0	1	2	7	0	17	3	32	0	9		76			9			REMIND		REMIND
'Production|Cement'	0	0	1	0	0	0	7	0	0	0	6	0	0		14			3			IMAGE		IMAGE
'Production|Chemicals'	0	0	0	0	0	0	7	0	0	0	0	0	0		7			1			IMAGE		0
'Production|Non-ferrous metals'	0	0	0	0	0	0	0	0	0	0	0	0	0		0			0			0		0
'Production|Pulp and Paper'	0	0	0	0	0	0	7	0	0	0	0	0	0		7			1			IMAGE		0
'Production|Steel'	0	0	1	0	0	0	7	0	0	0	6	0	0		14			3			IMAGE		IMAGE
'Resource|Extraction|Coal'	0	0	0	0	0	0	0	0	1	0	17	0	0		18			2			REMIND		REMIND
'Resource|Extraction|Fossil'	0	0	0	0	0	0	0	0	0	0	0	0	0		0			0			0		0
'Resource|Extraction|Gas'	0	0	0	0	0	0	0	0	1	0	17	0	0		18			2			REMIND		REMIND
'Resource|Extraction|Oil'	0	0	0	0	0	0	0	0	1	0	17	0	0		18			2			REMIND		REMIND
'Resource|Use|Mineral|Electricity'	1	0	0	0	0	0	0	0	1	0	1	0	0		3			3			AIM		AIM
'Revenue|government'	0	0	0	0	0	0	0	0	0	0	0	0	0		0			0			0		0
'Secondary Energy'	3	0	1	0	0	2	7	0	14	0	29	0	5		61			7			REMIND		REMIND
'Secondary Energy|Electricity'	4	0	1	0	6	2	7	0	19	4	41	0	9		93			9			REMIND		REMIND
'Secondary Energy|Electricity|Biomass'	4	0	1	0	6	2	7	0	20	4	41	0	9		94			9			REMIND		REMIND
'Secondary Energy|Electricity|Biomass|w/ CCS'	4	0	1	0	6	2	7	0	14	4	41	0	9		88			9			REMIND		REMIND
'Secondary Energy|Electricity|Biomass|w/o CCS'	4	0	1	0	6	2	7	0	14	4	41	0	9		88			9			REMIND		REMIND
'Secondary Energy|Electricity|Coal'	4	0	1	0	6	2	7	0	20	4	41	0	9		94			9			REMIND		REMIND
'Secondary Energy|Electricity|Coal|w/ CCS'	4	0	1	0	6	2	7	0	14	4	41	0	9		88			9			REMIND		REMIND
'Secondary Energy|Electricity|Coal|w/o CCS'	4	0	1	0	6	2	7	0	14	4	41	0	9		88			9			REMIND		REMIND
'Secondary Energy|Electricity|Curtailment'	2	0	0	0	0	0	7	0	0	0	25	0	0		34			3			REMIND		REMIND
'Secondary Energy|Electricity|Fossil'	4	0	1	0	6	2	7	0	20	4	41	0	9		94			9			REMIND		REMIND
'Secondary Energy|Electricity|Fossil|w/ CCS'	3	0	1	0	0	0	7	0	9	0	0	0	5		25			5			MESSAGE		MESSAGE
'Secondary Energy|Electricity|Fossil|w/o CCS'	3	0	1	0	0	2	7	0	9	0	0	0	5		27			6			MESSAGE		MESSAGE
'Secondary Energy|Electricity|Gas'	4	0	1	0	6	2	7	0	20	4	41	0	9		94			9			REMIND		REMIND
'Secondary Energy|Electricity|Gas|w/ CCS'	4	0	1	0	6	2	7	0	14	4	41	0	9		88			9			REMIND		REMIND
'Secondary Energy|Electricity|Gas|w/o CCS'	4	0	1	0	6	2	7	0	14	4	41	0	9		88			9			REMIND		REMIND
'Secondary Energy|Electricity|Geothermal'	4	0	1	0	6	2	0	0	15	4	41	0	0		73			7			REMIND		REMIND
'Secondary Energy|Electricity|Hydro'	4	0	1	0	6	2	7	0	20	4	41	0	9		94			9			REMIND		REMIND
'Secondary Energy|Electricity|Non-Biomass Renewables'	4	0	1	0	6	2	7	0	20	4	41	0	9		94			9			REMIND		REMIND
'Secondary Energy|Electricity|Nuclear'	4	0	1	0	6	2	7	0	20	4	41	0	9		94			9			REMIND		REMIND
'Secondary Energy|Electricity|Ocean'	0	0	0	0	0	0	0	0	0	4	0	0	0		4			1			POLES		0
'Secondary Energy|Electricity|Oil'	4	0	1	0	6	2	7	0	20	4	41	0	9		94			9			REMIND		REMIND
'Secondary Energy|Electricity|Oil|w/ CCS'	4	0	1	0	5	2	7	0	0	3	0	0	0		22			6			IMAGE		IMAGE
'Secondary Energy|Electricity|Oil|w/o CCS'	4	0	1	0	5	2	7	0	11	4	40	0	7		81			9			REMIND		REMIND
'Secondary Energy|Electricity|Other'	3	0	0	0	0	2	7	0	15	0	19	0	0		46			5			REMIND		REMIND
'Secondary Energy|Electricity|Renewables (incl. Biomass)'	4	0	1	0	6	2	7	0	20	4	41	0	9		94			9			REMIND		REMIND
'Secondary Energy|Electricity|Solar'	4	0	1	0	6	2	7	0	20	4	41	0	9		94			9			REMIND		REMIND
'Secondary Energy|Electricity|Solar|CSP'	0	0	1	0	5	0	7	0	11	1	39	0	5		69			7			REMIND		REMIND
'Secondary Energy|Electricity|Solar|PV'	3	0	1	0	5	0	7	0	11	1	39	0	5		72			8			REMIND		REMIND
'Secondary Energy|Electricity|Storage Losses'	0	0	0	0	0	0	7	0	10	0	0	0	0		17			2			MESSAGE		MESSAGE
'Secondary Energy|Electricity|Transmission Losses'	3	0	0	0	0	0	0	0	10	0	0	0	0		13			2			MESSAGE		MESSAGE
'Secondary Energy|Electricity|Wind'	4	0	1	0	6	2	7	0	20	4	41	0	9		94			9			REMIND		REMIND
'Secondary Energy|Electricity|Wind|Offshore'	0	0	1	0	5	0	7	0	11	1	0	0	5		30			6			MESSAGE		MESSAGE
'Secondary Energy|Electricity|Wind|Onshore'	3	0	1	0	5	0	7	0	11	1	0	0	5		33			7			MESSAGE		MESSAGE
'Secondary Energy|Gases'	4	0	1	0	1	0	7	0	19	4	41	0	9		86			8			REMIND		REMIND
'Secondary Energy|Gases|Biomass'	0	0	0	0	1	0	0	0	12	1	40	0	0		54			4			REMIND		REMIND
'Secondary Energy|Gases|Coal'	0	0	0	0	1	0	0	0	12	1	40	0	0		54			4			REMIND		REMIND
'Secondary Energy|Gases|Natural Gas'	3	0	1	0	1	0	7	0	12	1	40	0	7		72			8			REMIND		REMIND
'Secondary Energy|Gases|Other'	0	0	0	0	0	0	0	0	10	0	17	0	0		27			2			REMIND		REMIND
'Secondary Energy|Heat'	3	0	0	0	0	0	0	0	18	4	41	0	0		66			4			REMIND		REMIND
'Secondary Energy|Heat|Biomass'	3	0	0	0	0	0	0	0	10	0	33	0	0		46			3			REMIND		REMIND
'Secondary Energy|Heat|Coal'	3	0	0	0	0	0	0	0	10	0	33	0	0		46			3			REMIND		REMIND
'Secondary Energy|Heat|Fossil'	3	0	0	0	0	0	0	0	10	0	33	0	0		46			3			REMIND		REMIND
'Secondary Energy|Heat|Gas'	3	0	0	0	0	0	0	0	10	0	33	0	0		46			3			REMIND		REMIND
'Secondary Energy|Heat|Geothermal'	3	0	0	0	0	0	0	0	11	0	34	0	0		48			3			REMIND		REMIND
'Secondary Energy|Heat|Non-Biomass Renewables'	3	0	0	0	0	0	0	0	11	0	34	0	0		48			3			REMIND		REMIND
'Secondary Energy|Heat|Nuclear'	3	0	0	0	0	0	0	0	0	0	0	0	0		3			1			AIM		0
'Secondary Energy|Heat|Oil'	3	0	0	0	0	0	0	0	10	0	0	0	0		13			2			MESSAGE		MESSAGE
'Secondary Energy|Heat|Other'	0	0	0	0	0	0	0	0	10	0	0	0	0		10			1			MESSAGE		0
'Secondary Energy|Heat|Renewables (incl. Biomass)'	3	0	0	0	0	0	0	0	11	0	34	0	0		48			3			REMIND		REMIND
'Secondary Energy|Heat|Solar'	0	0	0	0	0	0	0	0	0	0	0	0	0		0			0			0		0
'Secondary Energy|Hydrogen'	0	0	1	0	1	0	7	0	17	1	40	0	5		72			7			REMIND		REMIND
'Secondary Energy|Hydrogen|Biomass'	0	0	0	0	1	0	7	0	11	0	39	0	0		58			4			REMIND		REMIND
'Secondary Energy|Hydrogen|Biomass|w/ CCS'	0	0	0	0	1	0	7	0	10	0	39	0	0		57			4			REMIND		REMIND
'Secondary Energy|Hydrogen|Biomass|w/o CCS'	0	0	0	0	1	0	7	0	10	0	39	0	0		57			4			REMIND		REMIND
'Secondary Energy|Hydrogen|Coal'	0	0	0	0	0	0	7	0	10	0	33	0	0		50			3			REMIND		REMIND
'Secondary Energy|Hydrogen|Coal|w/ CCS'	0	0	0	0	0	0	7	0	9	0	33	0	0		49			3			REMIND		REMIND
'Secondary Energy|Hydrogen|Coal|w/o CCS'	0	0	0	0	0	0	7	0	9	0	33	0	0		49			3			REMIND		REMIND
'Secondary Energy|Hydrogen|Electricity'	0	0	0	0	1	0	7	0	11	0	39	0	5		63			5			REMIND		REMIND
'Secondary Energy|Hydrogen|Fossil'	0	0	0	0	0	0	7	0	10	0	38	0	5		60			4			REMIND		REMIND
'Secondary Energy|Hydrogen|Fossil|w/ CCS'	0	0	0	0	0	0	7	0	9	0	38	0	0		54			3			REMIND		REMIND
'Secondary Energy|Hydrogen|Fossil|w/o CCS'	0	0	0	0	0	0	7	0	9	0	38	0	0		54			3			REMIND		REMIND
'Secondary Energy|Hydrogen|Gas'	0	0	0	0	0	0	7	0	10	0	33	0	5		55			4			REMIND		REMIND
'Secondary Energy|Hydrogen|Gas|w/ CCS'	0	0	0	0	0	0	7	0	9	0	33	0	5		54			4			REMIND		REMIND
'Secondary Energy|Hydrogen|Gas|w/o CCS'	0	0	0	0	0	0	7	0	9	0	33	0	5		54			4			REMIND		REMIND
'Secondary Energy|Hydrogen|Non-Biomass Renewables'	0	0	0	0	0	0	7	0	0	0	0	0	0		7			1			IMAGE		0
'Secondary Energy|Hydrogen|Nuclear'	0	0	0	0	0	0	0	0	0	0	0	0	0		0			0			0		0
'Secondary Energy|Hydrogen|Oil'	0	0	0	0	0	0	7	0	0	0	0	0	0		7			1			IMAGE		0
'Secondary Energy|Hydrogen|Other'	0	0	0	0	0	0	0	0	0	0	0	0	0		0			0			0		0
'Secondary Energy|Hydrogen|Renewables (incl. Biomass)'	0	0	0	0	1	0	7	0	11	0	39	0	0		58			4			REMIND		REMIND
'Secondary Energy|Hydrogen|Solar'	0	0	0	0	0	0	7	0	0	0	0	0	0		7			1			IMAGE		0
'Secondary Energy|Liquids'	4	0	1	0	1	0	7	0	19	4	41	0	9		86			8			REMIND		REMIND
'Secondary Energy|Liquids|Biomass'	3	0	1	0	1	0	7	0	14	4	41	0	7		78			8			REMIND		REMIND
'Secondary Energy|Liquids|Biomass|1st Generation'	3	0	0	0	0	0	7	0	0	0	29	0	5		44			4			REMIND		REMIND
'Secondary Energy|Liquids|Biomass|Energy Crops'	3	0	0	0	0	0	7	0	0	0	29	0	5		44			4			REMIND		REMIND
'Secondary Energy|Liquids|Biomass|Other'	0	0	0	0	0	0	7	0	0	0	0	0	0		7			1			IMAGE		0
'Secondary Energy|Liquids|Biomass|Residues'	3	0	0	0	0	0	0	0	0	0	29	0	0		32			2			REMIND		REMIND
'Secondary Energy|Liquids|Biomass|w/ CCS'	3	0	1	0	1	0	7	0	13	4	41	0	0		70			7			REMIND		REMIND
'Secondary Energy|Liquids|Biomass|w/o CCS'	3	0	1	0	1	0	7	0	13	4	41	0	2		72			8			REMIND		REMIND
'Secondary Energy|Liquids|Coal'	0	0	1	0	0	0	0	0	14	4	41	0	0		60			4			REMIND		REMIND
'Secondary Energy|Liquids|Coal|w/ CCS'	0	0	1	0	0	0	0	0	13	4	41	0	0		59			4			REMIND		REMIND
'Secondary Energy|Liquids|Coal|w/o CCS'	0	0	1	0	0	0	0	0	13	4	41	0	0		59			4			REMIND		REMIND
'Secondary Energy|Liquids|Fossil'	3	0	1	0	0	0	7	0	9	0	29	0	5		54			6			REMIND		REMIND
'Secondary Energy|Liquids|Fossil|w/ CCS'	0	0	1	0	0	0	0	0	9	0	29	0	0		39			3			REMIND		REMIND
'Secondary Energy|Liquids|Fossil|w/o CCS'	3	0	1	0	0	0	7	0	9	0	29	0	0		49			5			REMIND		REMIND
'Secondary Energy|Liquids|Gas'	0	0	0	0	0	0	0	0	14	4	30	0	0		48			3			REMIND		REMIND
'Secondary Energy|Liquids|Gas|w/ CCS'	0	0	0	0	0	0	0	0	13	4	30	0	0		47			3			REMIND		REMIND
'Secondary Energy|Liquids|Gas|w/o CCS'	0	0	0	0	0	0	0	0	13	4	30	0	0		47			3			REMIND		REMIND
'Secondary Energy|Liquids|Oil'	3	0	1	0	1	0	7	0	14	4	41	0	7		78			8			REMIND		REMIND
'Secondary Energy|Liquids|Other'	0	0	0	0	0	0	0	0	0	0	0	0	0		0			0			0		0
'Secondary Energy|Other Carrier'	0	0	0	0	0	0	0	0	0	0	0	0	0		0			0			0		0
'Secondary Energy|Solids'	3	0	1	0	0	0	7	0	18	4	41	0	7		81			7			REMIND		REMIND
'Secondary Energy|Solids|Biomass'	3	0	1	0	0	0	7	0	10	0	29	0	0		50			5			REMIND		REMIND
'Secondary Energy|Solids|Coal'	3	0	1	0	0	0	7	0	10	0	29	0	5		55			6			REMIND		REMIND
'Specific Energy Consumption|Production|Cement'	0	0	0	0	0	0	0	0	0	0	0	0	0		0			0			0		0
'Specific Energy Consumption|Production|Chemicals'	0	0	0	0	0	0	0	0	0	0	0	0	0		0			0			0		0
'Specific Energy Consumption|Production|Chemicals|Ammonia'	0	0	0	0	0	0	0	0	0	0	0	0	0		0			0			0		0
'Specific Energy Consumption|Production|Chemicals|High value chemicals'	0	0	0	0	0	0	0	0	0	0	0	0	0		0			0			0		0
'Specific Energy Consumption|Production|Chemicals|Methanol'	0	0	0	0	0	0	0	0	0	0	0	0	0		0			0			0		0
'Specific Energy Consumption|Production|Steel'	0	0	0	0	0	0	0	0	0	0	0	0	0		0			0			0		0
'Subsidies|Energy'	0	0	0	0	0	0	7	0	0	0	25	0	0		32			2			REMIND		REMIND
'Subsidies|Energy|Fossil'	0	0	0	0	0	0	7	0	0	0	34	0	0		41			2			REMIND		REMIND
'Temperature|Global Mean'	0	3	0	0	5	0	7	0	2	0	15	0	0		32			5			REMIND		REMIND
'Trade'	0	0	1	0	0	0	0	0	7	0	25	0	0		33			3			REMIND		REMIND
'Trade|Primary Energy|Biomass|Volume'	3	0	1	0	0	0	7	0	9	0	38	0	0		58			5			REMIND		REMIND
'Trade|Primary Energy|Coal|Volume'	3	0	1	0	0	0	7	0	9	0	38	0	5		63			6			REMIND		REMIND
'Trade|Primary Energy|Gas|Volume'	3	0	1	0	0	0	7	0	9	0	38	0	5		63			6			REMIND		REMIND
'Trade|Primary Energy|Oil|Volume'	3	0	1	0	0	0	7	0	9	0	38	0	5		63			6			REMIND		REMIND
'Trade|Secondary Energy|Electricity|Volume'	3	0	0	0	0	0	0	0	7	0	0	0	0		10			2			MESSAGE		MESSAGE
'Trade|Secondary Energy|Hydrogen|Volume'	0	0	0	0	0	0	0	0	7	0	0	0	0		7			1			MESSAGE		0
'Trade|Secondary Energy|Liquids|Biomass|Volume'	3	0	1	0	0	0	0	0	7	0	0	0	0		11			3			MESSAGE		MESSAGE
'Trade|Secondary Energy|Liquids|Coal|Volume'	0	0	0	0	0	0	0	0	7	0	0	0	0		7			1			MESSAGE		0
'Trade|Secondary Energy|Liquids|Oil|Volume'	3	0	1	0	0	0	0	0	7	0	0	0	0		11			3			MESSAGE		MESSAGE
'Trade|Uranium|Mass'	0	0	0	0	0	0	0	0	0	0	29	0	0		29			1			REMIND		0
'Transport|Stock|Road'	0	0	0	0	0	0	0	0	0	0	0	0	0		0			0			0		0
'Transport|Stock|Road|Freight'	0	0	0	0	0	0	0	0	0	0	0	0	0		0			0			0		0
'Transport|Stock|Road|Passenger'	0	0	0	0	0	0	0	0	0	0	0	0	0		0			0			0		0
'Transport|Stock|Road|Passenger|2W&3W'	0	0	0	0	0	0	0	0	0	0	0	0	0		0			0			0		0
'Transport|Stock|Road|Passenger|Bus'	0	0	0	0	0	0	0	0	0	0	0	0	0		0			0			0		0
'Transport|Stock|Road|Passenger|LDV'	0	0	0	0	0	0	0	0	0	0	4	0	0		4			1			REMIND		0
'Unemployment'	0	0	0	0	0	2	0	0	0	0	0	0	0		2			1			GEM-E3		0
'Unemployment|Rate'	2	0	0	0	0	2	0	0	0	0	0	0	0		4			2			AIM		AIM
'Value Added|Agriculture'	3	0	0	0	0	2	0	0	0	0	0	0	0		5			2			AIM		AIM
'Value Added|Industry'	0	0	0	0	0	2	7	0	0	1	0	0	0		10			3			IMAGE		IMAGE
'Value Added|Industry|Energy'	2	0	0	0	0	0	0	0	0	0	0	0	0		2			1			AIM		0
'Value Added|Industry|Energy Intensive'	0	0	0	0	0	2	0	0	0	0	0	0	0		2			1			GEM-E3		0
'Value Added|Industry|Manufacturing'	0	0	0	0	0	0	0	0	0	0	0	0	0		0			0			0		0
'Value Added|Residential and Commercial|Commercial'	0	0	0	0	0	2	0	0	0	0	0	0	0		2			1			GEM-E3		0
'Water Consumption'	3	0	0	0	0	0	0	0	9	0	0	0	5		17			3			MESSAGE		MESSAGE
'Water Consumption|Electricity'	4	0	0	0	0	0	7	0	8	0	4	0	5		28			5			MESSAGE		MESSAGE
'Water Consumption|Electricity w/o Hydro'	1	0	0	0	0	0	0	0	1	0	4	0	0		6			3			REMIND		REMIND
'Water Consumption|Electricity|Biomass'	3	0	0	0	0	0	7	0	7	0	3	0	5		25			5			IMAGE		IMAGE
'Water Consumption|Electricity|Biomass|w/ CCS'	3	0	0	0	0	0	7	0	7	0	3	0	5		25			5			IMAGE		IMAGE
'Water Consumption|Electricity|Biomass|w/o CCS'	3	0	0	0	0	0	7	0	7	0	3	0	5		25			5			IMAGE		IMAGE
'Water Consumption|Electricity|Coal'	3	0	0	0	0	0	7	0	7	0	3	0	5		25			5			IMAGE		IMAGE
'Water Consumption|Electricity|Coal|w/ CCS'	3	0	0	0	0	0	7	0	7	0	3	0	5		25			5			IMAGE		IMAGE
'Water Consumption|Electricity|Coal|w/o CCS'	3	0	0	0	0	0	7	0	7	0	3	0	5		25			5			IMAGE		IMAGE
'Water Consumption|Electricity|Cooling Pond'	0	0	0	0	0	0	7	0	0	0	3	0	5		15			3			IMAGE		IMAGE
'Water Consumption|Electricity|Dry Cooling'	0	0	0	0	0	0	7	0	7	0	3	0	5		22			4			IMAGE		IMAGE
'Water Consumption|Electricity|Fossil'	3	0	0	0	0	0	7	0	7	0	3	0	5		25			5			IMAGE		IMAGE
'Water Consumption|Electricity|Fossil|w/ CCS'	3	0	0	0	0	0	7	0	7	0	3	0	5		25			5			IMAGE		IMAGE
'Water Consumption|Electricity|Fossil|w/o CCS'	3	0	0	0	0	0	7	0	7	0	3	0	5		25			5			IMAGE		IMAGE
'Water Consumption|Electricity|Gas'	3	0	0	0	0	0	7	0	7	0	3	0	5		25			5			IMAGE		IMAGE
'Water Consumption|Electricity|Gas|w/ CCS'	3	0	0	0	0	0	7	0	7	0	3	0	5		25			5			IMAGE		IMAGE
'Water Consumption|Electricity|Gas|w/o CCS'	3	0	0	0	0	0	7	0	7	0	3	0	5		25			5			IMAGE		IMAGE
'Water Consumption|Electricity|Geothermal'	3	0	0	0	0	0	7	0	7	0	3	0	0		20			4			IMAGE		IMAGE
'Water Consumption|Electricity|Hydro'	3	0	0	0	0	0	7	0	7	0	3	0	5		25			5			IMAGE		IMAGE
'Water Consumption|Electricity|Non-Biomass Renewables'	3	0	0	0	0	0	7	0	7	0	3	0	5		25			5			IMAGE		IMAGE
'Water Consumption|Electricity|Nuclear'	3	0	0	0	0	0	7	0	7	0	3	0	5		25			5			IMAGE		IMAGE
'Water Consumption|Electricity|Oil'	3	0	0	0	0	0	7	0	7	0	3	0	5		25			5			IMAGE		IMAGE
'Water Consumption|Electricity|Oil|w/ CCS'	3	0	0	0	0	0	7	0	0	0	0	0	0		10			2			IMAGE		IMAGE
'Water Consumption|Electricity|Oil|w/o CCS'	3	0	0	0	0	0	7	0	0	0	3	0	5		18			4			IMAGE		IMAGE
'Water Consumption|Electricity|Once Through'	0	0	0	0	0	0	7	0	7	0	3	0	5		22			4			IMAGE		IMAGE
'Water Consumption|Electricity|Other'	0	0	0	0	0	0	7	0	7	0	0	0	0		14			2			IMAGE		IMAGE
'Water Consumption|Electricity|Sea Cooling'	0	0	0	0	0	0	7	0	7	0	0	0	5		19			3			IMAGE		IMAGE
'Water Consumption|Electricity|Solar'	0	0	0	0	0	0	7	0	7	0	3	0	5		22			4			IMAGE		IMAGE
'Water Consumption|Electricity|Solar|CSP'	0	0	0	0	0	0	7	0	7	0	3	0	5		22			4			IMAGE		IMAGE
'Water Consumption|Electricity|Solar|PV'	0	0	0	0	0	0	7	0	7	0	3	0	5		22			4			IMAGE		IMAGE
'Water Consumption|Electricity|Wet Tower'	0	0	0	0	0	0	7	0	7	0	3	0	5		22			4			IMAGE		IMAGE
'Water Consumption|Electricity|Wind'	3	0	0	0	0	0	7	0	7	0	3	0	0		20			4			IMAGE		IMAGE
'Water Consumption|Extraction'	0	0	0	0	0	0	0	0	7	0	0	0	0		7			1			MESSAGE		0
'Water Consumption|Extraction|Coal'	0	0	0	0	0	0	0	0	7	0	0	0	0		7			1			MESSAGE		0
'Water Consumption|Extraction|Gas'	0	0	0	0	0	0	0	0	7	0	0	0	0		7			1			MESSAGE		0
'Water Consumption|Extraction|Oil'	0	0	0	0	0	0	0	0	7	0	0	0	0		7			1			MESSAGE		0
'Water Consumption|Extraction|Uranium'	0	0	0	0	0	0	0	0	7	0	0	0	0		7			1			MESSAGE		0
'Water Consumption|Gases'	0	0	0	0	0	0	0	0	7	0	0	0	0		7			1			MESSAGE		0
'Water Consumption|Gases|Biomass'	0	0	0	0	0	0	0	0	7	0	0	0	0		7			1			MESSAGE		0
'Water Consumption|Gases|Coal'	0	0	0	0	0	0	0	0	7	0	0	0	0		7			1			MESSAGE		0
'Water Consumption|Heat'	0	0	0	0	0	0	0	0	7	0	0	0	0		7			1			MESSAGE		0
'Water Consumption|Heat|Biomass'	0	0	0	0	0	0	0	0	7	0	0	0	0		7			1			MESSAGE		0
'Water Consumption|Heat|Coal'	0	0	0	0	0	0	0	0	7	0	0	0	0		7			1			MESSAGE		0
'Water Consumption|Heat|Gas'	0	0	0	0	0	0	0	0	7	0	0	0	0		7			1			MESSAGE		0
'Water Consumption|Heat|Geothermal'	0	0	0	0	0	0	0	0	7	0	0	0	0		7			1			MESSAGE		0
'Water Consumption|Heat|Oil'	0	0	0	0	0	0	0	0	7	0	0	0	0		7			1			MESSAGE		0
'Water Consumption|Heat|Other'	0	0	0	0	0	0	0	0	7	0	0	0	0		7			1			MESSAGE		0
'Water Consumption|Hydrogen'	0	0	0	0	0	0	0	0	7	0	0	0	0		7			1			MESSAGE		0
'Water Consumption|Hydrogen|Biomass'	0	0	0	0	0	0	0	0	7	0	0	0	0		7			1			MESSAGE		0
'Water Consumption|Hydrogen|Biomass|w/ CCS'	0	0	0	0	0	0	0	0	7	0	0	0	0		7			1			MESSAGE		0
'Water Consumption|Hydrogen|Biomass|w/o CCS'	0	0	0	0	0	0	0	0	7	0	0	0	0		7			1			MESSAGE		0
'Water Consumption|Hydrogen|Coal'	0	0	0	0	0	0	0	0	7	0	0	0	0		7			1			MESSAGE		0
'Water Consumption|Hydrogen|Coal|w/ CCS'	0	0	0	0	0	0	0	0	7	0	0	0	0		7			1			MESSAGE		0
'Water Consumption|Hydrogen|Coal|w/o CCS'	0	0	0	0	0	0	0	0	7	0	0	0	0		7			1			MESSAGE		0
'Water Consumption|Hydrogen|Electricity'	0	0	0	0	0	0	0	0	7	0	0	0	0		7			1			MESSAGE		0
'Water Consumption|Hydrogen|Fossil'	0	0	0	0	0	0	0	0	7	0	0	0	0		7			1			MESSAGE		0
'Water Consumption|Hydrogen|Fossil|w/ CCS'	0	0	0	0	0	0	0	0	7	0	0	0	0		7			1			MESSAGE		0
'Water Consumption|Hydrogen|Fossil|w/o CCS'	0	0	0	0	0	0	0	0	7	0	0	0	0		7			1			MESSAGE		0
'Water Consumption|Hydrogen|Gas'	0	0	0	0	0	0	0	0	7	0	0	0	0		7			1			MESSAGE		0
'Water Consumption|Hydrogen|Gas|w/ CCS'	0	0	0	0	0	0	0	0	7	0	0	0	0		7			1			MESSAGE		0
'Water Consumption|Hydrogen|Gas|w/o CCS'	0	0	0	0	0	0	0	0	7	0	0	0	0		7			1			MESSAGE		0
'Water Consumption|Industrial Water'	3	0	0	0	0	0	7	0	0	0	0	0	0		10			2			IMAGE		IMAGE
'Water Consumption|Irrigation'	3	0	0	0	0	0	0	0	9	0	5	0	0		17			3			MESSAGE		MESSAGE
'Water Consumption|Liquids'	0	0	0	0	0	0	0	0	7	0	0	0	0		7			1			MESSAGE		0
'Water Consumption|Liquids|Biomass'	0	0	0	0	0	0	0	0	7	0	0	0	0		7			1			MESSAGE		0
'Water Consumption|Liquids|Biomass|w/ CCS'	0	0	0	0	0	0	0	0	7	0	0	0	0		7			1			MESSAGE		0
'Water Consumption|Liquids|Biomass|w/o CCS'	0	0	0	0	0	0	0	0	7	0	0	0	0		7			1			MESSAGE		0
'Water Consumption|Liquids|Coal'	0	0	0	0	0	0	0	0	7	0	0	0	0		7			1			MESSAGE		0
'Water Consumption|Liquids|Coal|w/ CCS'	0	0	0	0	0	0	0	0	7	0	0	0	0		7			1			MESSAGE		0
'Water Consumption|Liquids|Coal|w/o CCS'	0	0	0	0	0	0	0	0	7	0	0	0	0		7			1			MESSAGE		0
'Water Consumption|Liquids|Fossil'	0	0	0	0	0	0	0	0	7	0	0	0	0		7			1			MESSAGE		0
'Water Consumption|Liquids|Fossil|w/ CCS'	0	0	0	0	0	0	0	0	7	0	0	0	0		7			1			MESSAGE		0
'Water Consumption|Liquids|Fossil|w/o CCS'	0	0	0	0	0	0	0	0	7	0	0	0	0		7			1			MESSAGE		0
'Water Consumption|Liquids|Gas'	0	0	0	0	0	0	0	0	7	0	0	0	0		7			1			MESSAGE		0
'Water Consumption|Liquids|Gas|w/ CCS'	0	0	0	0	0	0	0	0	7	0	0	0	0		7			1			MESSAGE		0
'Water Consumption|Liquids|Gas|w/o CCS'	0	0	0	0	0	0	0	0	7	0	0	0	0		7			1			MESSAGE		0
'Water Consumption|Liquids|Oil'	0	0	0	0	0	0	0	0	7	0	0	0	0		7			1			MESSAGE		0
'Water Consumption|Municipal Water'	3	0	0	0	0	0	7	0	0	0	0	0	0		10			2			IMAGE		IMAGE
'Water Withdrawal'	3	0	0	0	0	0	7	0	7	0	0	0	5		22			4			IMAGE		IMAGE
'Water Withdrawal|Electricity'	3	0	0	0	0	0	7	0	7	0	3	0	5		25			5			IMAGE		IMAGE
'Water Withdrawal|Electricity|Biomass'	3	0	0	0	0	0	7	0	7	0	3	0	5		25			5			IMAGE		IMAGE
'Water Withdrawal|Electricity|Biomass|w/ CCS'	3	0	0	0	0	0	7	0	7	0	3	0	5		25			5			IMAGE		IMAGE
'Water Withdrawal|Electricity|Biomass|w/o CCS'	3	0	0	0	0	0	7	0	7	0	3	0	5		25			5			IMAGE		IMAGE
'Water Withdrawal|Electricity|Coal'	3	0	0	0	0	0	7	0	7	0	3	0	5		25			5			IMAGE		IMAGE
'Water Withdrawal|Electricity|Coal|w/ CCS'	3	0	0	0	0	0	7	0	7	0	3	0	5		25			5			IMAGE		IMAGE
'Water Withdrawal|Electricity|Coal|w/o CCS'	3	0	0	0	0	0	7	0	7	0	3	0	5		25			5			IMAGE		IMAGE
'Water Withdrawal|Electricity|Cooling Pond'	0	0	0	0	0	0	7	0	0	0	3	0	5		15			3			IMAGE		IMAGE
'Water Withdrawal|Electricity|Dry Cooling'	0	0	0	0	0	0	7	0	7	0	3	0	5		22			4			IMAGE		IMAGE
'Water Withdrawal|Electricity|Fossil'	3	0	0	0	0	0	7	0	0	0	3	0	5		18			4			IMAGE		IMAGE
'Water Withdrawal|Electricity|Fossil|w/ CCS'	3	0	0	0	0	0	7	0	7	0	3	0	5		25			5			IMAGE		IMAGE
'Water Withdrawal|Electricity|Fossil|w/o CCS'	3	0	0	0	0	0	7	0	7	0	3	0	5		25			5			IMAGE		IMAGE
'Water Withdrawal|Electricity|Gas'	3	0	0	0	0	0	7	0	7	0	3	0	5		25			5			IMAGE		IMAGE
'Water Withdrawal|Electricity|Gas|w/ CCS'	3	0	0	0	0	0	7	0	7	0	3	0	5		25			5			IMAGE		IMAGE
'Water Withdrawal|Electricity|Gas|w/o CCS'	3	0	0	0	0	0	7	0	7	0	3	0	5		25			5			IMAGE		IMAGE
'Water Withdrawal|Electricity|Geothermal'	3	0	0	0	0	0	0	0	7	0	3	0	0		13			3			MESSAGE		MESSAGE
'Water Withdrawal|Electricity|Hydro'	3	0	0	0	0	0	7	0	7	0	3	0	0		20			4			IMAGE		IMAGE
'Water Withdrawal|Electricity|Non-Biomass Renewables'	3	0	0	0	0	0	7	0	7	0	3	0	5		25			5			IMAGE		IMAGE
'Water Withdrawal|Electricity|Nuclear'	3	0	0	0	0	0	7	0	7	0	3	0	5		25			5			IMAGE		IMAGE
'Water Withdrawal|Electricity|Ocean'	0	0	0	0	0	0	7	0	0	0	0	0	0		7			1			IMAGE		0
'Water Withdrawal|Electricity|Oil'	3	0	0	0	0	0	7	0	7	0	3	0	5		25			5			IMAGE		IMAGE
'Water Withdrawal|Electricity|Oil|w/ CCS'	3	0	0	0	0	0	7	0	0	0	3	0	0		13			3			IMAGE		IMAGE
'Water Withdrawal|Electricity|Oil|w/o CCS'	3	0	0	0	0	0	7	0	0	0	0	0	5		15			3			IMAGE		IMAGE
'Water Withdrawal|Electricity|Once Through'	0	0	0	0	0	0	7	0	7	0	3	0	5		22			4			IMAGE		IMAGE
'Water Withdrawal|Electricity|Other'	0	0	0	0	0	0	7	0	7	0	0	0	0		14			2			IMAGE		IMAGE
'Water Withdrawal|Electricity|Sea Cooling'	0	0	0	0	0	0	7	0	7	0	0	0	5		19			3			IMAGE		IMAGE
'Water Withdrawal|Electricity|Solar'	0	0	0	0	0	0	7	0	7	0	3	0	5		22			4			IMAGE		IMAGE
'Water Withdrawal|Electricity|Solar|CSP'	0	0	0	0	0	0	7	0	7	0	3	0	5		22			4			IMAGE		IMAGE
'Water Withdrawal|Electricity|Solar|PV'	0	0	0	0	0	0	7	0	7	0	3	0	5		22			4			IMAGE		IMAGE
'Water Withdrawal|Electricity|Wet Tower'	0	0	0	0	0	0	7	0	7	0	3	0	5		22			4			IMAGE		IMAGE
'Water Withdrawal|Electricity|Wind'	3	0	0	0	0	0	7	0	7	0	3	0	0		20			4			IMAGE		IMAGE
'Water Withdrawal|Extraction'	0	0	0	0	0	0	0	0	7	0	0	0	0		7			1			MESSAGE		0
'Water Withdrawal|Extraction|Coal'	0	0	0	0	0	0	0	0	7	0	0	0	0		7			1			MESSAGE		0
'Water Withdrawal|Extraction|Gas'	0	0	0	0	0	0	0	0	7	0	0	0	0		7			1			MESSAGE		0
'Water Withdrawal|Extraction|Oil'	0	0	0	0	0	0	0	0	7	0	0	0	0		7			1			MESSAGE		0
'Water Withdrawal|Extraction|Uranium'	0	0	0	0	0	0	0	0	7	0	0	0	0		7			1			MESSAGE		0
'Water Withdrawal|Gases'	0	0	0	0	0	0	0	0	7	0	0	0	0		7			1			MESSAGE		0
'Water Withdrawal|Gases|Biomass'	0	0	0	0	0	0	0	0	7	0	0	0	0		7			1			MESSAGE		0
'Water Withdrawal|Gases|Coal'	0	0	0	0	0	0	0	0	7	0	0	0	0		7			1			MESSAGE		0
'Water Withdrawal|Heat'	0	0	0	0	0	0	0	0	7	0	0	0	0		7			1			MESSAGE		0
'Water Withdrawal|Heat|Biomass'	0	0	0	0	0	0	0	0	7	0	0	0	0		7			1			MESSAGE		0
'Water Withdrawal|Heat|Coal'	0	0	0	0	0	0	0	0	7	0	0	0	0		7			1			MESSAGE		0
'Water Withdrawal|Heat|Gas'	0	0	0	0	0	0	0	0	7	0	0	0	0		7			1			MESSAGE		0
'Water Withdrawal|Heat|Geothermal'	0	0	0	0	0	0	0	0	7	0	0	0	0		7			1			MESSAGE		0
'Water Withdrawal|Heat|Oil'	0	0	0	0	0	0	0	0	7	0	0	0	0		7			1			MESSAGE		0
'Water Withdrawal|Heat|Other'	0	0	0	0	0	0	0	0	7	0	0	0	0		7			1			MESSAGE		0
'Water Withdrawal|Hydrogen'	0	0	0	0	0	0	0	0	7	0	0	0	0		7			1			MESSAGE		0
'Water Withdrawal|Hydrogen|Biomass'	0	0	0	0	0	0	0	0	7	0	0	0	0		7			1			MESSAGE		0
'Water Withdrawal|Hydrogen|Biomass|w/ CCS'	0	0	0	0	0	0	0	0	7	0	0	0	0		7			1			MESSAGE		0
'Water Withdrawal|Hydrogen|Biomass|w/o CCS'	0	0	0	0	0	0	0	0	7	0	0	0	0		7			1			MESSAGE		0
'Water Withdrawal|Hydrogen|Coal'	0	0	0	0	0	0	0	0	7	0	0	0	0		7			1			MESSAGE		0
'Water Withdrawal|Hydrogen|Coal|w/ CCS'	0	0	0	0	0	0	0	0	7	0	0	0	0		7			1			MESSAGE		0
'Water Withdrawal|Hydrogen|Coal|w/o CCS'	0	0	0	0	0	0	0	0	7	0	0	0	0		7			1			MESSAGE		0
'Water Withdrawal|Hydrogen|Electricity'	0	0	0	0	0	0	0	0	7	0	0	0	0		7			1			MESSAGE		0
'Water Withdrawal|Hydrogen|Fossil'	0	0	0	0	0	0	0	0	7	0	0	0	0		7			1			MESSAGE		0
'Water Withdrawal|Hydrogen|Fossil|w/ CCS'	0	0	0	0	0	0	0	0	7	0	0	0	0		7			1			MESSAGE		0
'Water Withdrawal|Hydrogen|Fossil|w/o CCS'	0	0	0	0	0	0	0	0	7	0	0	0	0		7			1			MESSAGE		0
'Water Withdrawal|Hydrogen|Gas'	0	0	0	0	0	0	0	0	7	0	0	0	0		7			1			MESSAGE		0
'Water Withdrawal|Hydrogen|Gas|w/ CCS'	0	0	0	0	0	0	0	0	7	0	0	0	0		7			1			MESSAGE		0
'Water Withdrawal|Hydrogen|Gas|w/o CCS'	0	0	0	0	0	0	0	0	7	0	0	0	0		7			1			MESSAGE		0
'Water Withdrawal|Industrial Water'	3	0	0	0	0	0	7	0	0	0	0	0	0		10			2			IMAGE		IMAGE
'Water Withdrawal|Irrigation'	1	0	0	0	0	0	7	0	10	0	20	0	5		43			5			REMIND		REMIND
'Water Withdrawal|Liquids'	0	0	0	0	0	0	0	0	7	0	0	0	0		7			1			MESSAGE		0
'Water Withdrawal|Liquids|Biomass'	0	0	0	0	0	0	0	0	7	0	0	0	0		7			1			MESSAGE		0
'Water Withdrawal|Liquids|Biomass|w/ CCS'	0	0	0	0	0	0	0	0	7	0	0	0	0		7			1			MESSAGE		0
'Water Withdrawal|Liquids|Biomass|w/o CCS'	0	0	0	0	0	0	0	0	7	0	0	0	0		7			1			MESSAGE		0
'Water Withdrawal|Liquids|Coal'	0	0	0	0	0	0	0	0	7	0	0	0	0		7			1			MESSAGE		0
'Water Withdrawal|Liquids|Coal|w/ CCS'	0	0	0	0	0	0	0	0	7	0	0	0	0		7			1			MESSAGE		0
'Water Withdrawal|Liquids|Coal|w/o CCS'	0	0	0	0	0	0	0	0	7	0	0	0	0		7			1			MESSAGE		0
'Water Withdrawal|Liquids|Fossil'	0	0	0	0	0	0	0	0	7	0	0	0	0		7			1			MESSAGE		0
'Water Withdrawal|Liquids|Fossil|w/ CCS'	0	0	0	0	0	0	0	0	7	0	0	0	0		7			1			MESSAGE		0
'Water Withdrawal|Liquids|Fossil|w/o CCS'	0	0	0	0	0	0	0	0	7	0	0	0	0		7			1			MESSAGE		0
'Water Withdrawal|Liquids|Gas'	0	0	0	0	0	0	0	0	7	0	0	0	0		7			1			MESSAGE		0
'Water Withdrawal|Liquids|Gas|w/ CCS'	0	0	0	0	0	0	0	0	7	0	0	0	0		7			1			MESSAGE		0
'Water Withdrawal|Liquids|Gas|w/o CCS'	0	0	0	0	0	0	0	0	7	0	0	0	0		7			1			MESSAGE		0
'Water Withdrawal|Liquids|Oil'	0	0	0	0	0	0	0	0	7	0	0	0	0		7			1			MESSAGE		0
'Water Withdrawal|Municipal Water'	3	0	0	0	0	0	7	0	0	0	0	0	0		10			2			IMAGE		IMAGE
'Yield|Bioenergy|2nd generation'	0	0	0	0	0	0	0	0	0	0	9	0	0		9			1			REMIND		0
'Yield|Cereal'	3	0	0	0	0	0	7	0	9	0	23	0	0		42			4			REMIND		REMIND
'Yield|Oilcrops'	0	0	0	0	0	0	0	0	9	0	16	0	0		25			2			REMIND		REMIND
'Yield|Sugarcrops'	2	0	0	0	0	0	0	0	9	0	16	0	0		27			3			REMIND		REMIND
														Total
Total variables reported	702	117	310	0	274	338	856	0	877	274	856	0	591
Scenarios per model	4	3	1	0	6	2	7	0	20	4	41	0	9	97
Dominant model count	26	2	0	0	0	13	303	0	220	2	710	0	16	1292
Dominant model count (>1 model)	13	0	0	0	0	0	187	0	89	0	673	0	5	967

## Sheet: C2
	AIM	C-ROADS	COFFEE	EPPA	GCAM	GEM-E3	IMAGE	MERGE-ETL	MESSAGE	POLES	REMIND	TIAM	WITCH		Total number of scenarios			Number of models that report variable			Dominant Model		Dominant Model (>1 model)
'AR6 climate diagnostics|Effective Radiative Forcing|Basket|Greenhouse Gases|CICERO-SCM|50.0th Percentile'	3	2	4	0	6	10	9	0	43	10	44	0	2		133			10			REMIND		REMIND
'AR6 climate diagnostics|Effective Radiative Forcing|Basket|Greenhouse Gases|FaIRv1.6.2|50.0th Percentile'	3	2	4	0	6	10	9	0	43	10	44	0	2		133			10			REMIND		REMIND
'AR6 climate diagnostics|Effective Radiative Forcing|Basket|Non-CO2 Greenhouse Gases|CICERO-SCM|50.0th Percentile'	3	2	4	0	6	10	9	0	43	10	44	0	2		133			10			REMIND		REMIND
'AR6 climate diagnostics|Effective Radiative Forcing|Basket|Non-CO2 Greenhouse Gases|FaIRv1.6.2|50.0th Percentile'	3	2	4	0	6	10	9	0	43	10	44	0	2		133			10			REMIND		REMIND
'AR6 climate diagnostics|Effective Radiative Forcing|CH4|CICERO-SCM|50.0th Percentile'	3	2	4	0	6	10	9	0	43	10	44	0	2		133			10			REMIND		REMIND
'AR6 climate diagnostics|Effective Radiative Forcing|CH4|FaIRv1.6.2|50.0th Percentile'	3	2	4	0	6	10	9	0	43	10	44	0	2		133			10			REMIND		REMIND
'AR6 climate diagnostics|Effective Radiative Forcing|CICERO-SCM|33.0th Percentile'	3	2	4	0	6	10	9	0	43	10	44	0	2		133			10			REMIND		REMIND
'AR6 climate diagnostics|Effective Radiative Forcing|CICERO-SCM|5.0th Percentile'	3	2	4	0	6	10	9	0	43	10	44	0	2		133			10			REMIND		REMIND
'AR6 climate diagnostics|Effective Radiative Forcing|CICERO-SCM|50.0th Percentile'	3	2	4	0	6	10	9	0	43	10	44	0	2		133			10			REMIND		REMIND
'AR6 climate diagnostics|Effective Radiative Forcing|CICERO-SCM|67.0th Percentile'	3	2	4	0	6	10	9	0	43	10	44	0	2		133			10			REMIND		REMIND
'AR6 climate diagnostics|Effective Radiative Forcing|CICERO-SCM|95.0th Percentile'	3	2	4	0	6	10	9	0	43	10	44	0	2		133			10			REMIND		REMIND
'AR6 climate diagnostics|Effective Radiative Forcing|CO2|CICERO-SCM|50.0th Percentile'	3	2	4	0	6	10	9	0	43	10	44	0	2		133			10			REMIND		REMIND
'AR6 climate diagnostics|Effective Radiative Forcing|CO2|FaIRv1.6.2|50.0th Percentile'	3	2	4	0	6	10	9	0	43	10	44	0	2		133			10			REMIND		REMIND
'AR6 climate diagnostics|Effective Radiative Forcing|FaIRv1.6.2|33.0th Percentile'	3	2	4	0	6	10	9	0	43	10	44	0	2		133			10			REMIND		REMIND
'AR6 climate diagnostics|Effective Radiative Forcing|FaIRv1.6.2|5.0th Percentile'	3	2	4	0	6	10	9	0	43	10	44	0	2		133			10			REMIND		REMIND
'AR6 climate diagnostics|Effective Radiative Forcing|FaIRv1.6.2|50.0th Percentile'	3	2	4	0	6	10	9	0	43	10	44	0	2		133			10			REMIND		REMIND
'AR6 climate diagnostics|Effective Radiative Forcing|FaIRv1.6.2|67.0th Percentile'	3	2	4	0	6	10	9	0	43	10	44	0	2		133			10			REMIND		REMIND
'AR6 climate diagnostics|Effective Radiative Forcing|FaIRv1.6.2|95.0th Percentile'	3	2	4	0	6	10	9	0	43	10	44	0	2		133			10			REMIND		REMIND
'AR6 climate diagnostics|Effective Radiative Forcing|MAGICCv7.5.3|33.0th Percentile'	3	2	4	0	6	10	9	0	43	10	44	0	2		133			10			REMIND		REMIND
'AR6 climate diagnostics|Effective Radiative Forcing|MAGICCv7.5.3|5.0th Percentile'	3	2	4	0	6	10	9	0	43	10	44	0	2		133			10			REMIND		REMIND
'AR6 climate diagnostics|Effective Radiative Forcing|MAGICCv7.5.3|50.0th Percentile'	3	2	4	0	6	10	9	0	43	10	44	0	2		133			10			REMIND		REMIND
'AR6 climate diagnostics|Effective Radiative Forcing|MAGICCv7.5.3|67.0th Percentile'	3	2	4	0	6	10	9	0	43	10	44	0	2		133			10			REMIND		REMIND
'AR6 climate diagnostics|Effective Radiative Forcing|MAGICCv7.5.3|95.0th Percentile'	3	2	4	0	6	10	9	0	43	10	44	0	2		133			10			REMIND		REMIND
'AR6 climate diagnostics|Emissions|Kyoto Gases (AR5-GWP100)'	3	2	4	0	6	10	9	0	43	10	44	0	2		133			10			REMIND		REMIND
'AR6 climate diagnostics|Emissions|Kyoto Gases (AR6-GWP100)'	3	2	4	0	6	10	9	0	43	10	44	0	2		133			10			REMIND		REMIND
'AR6 climate diagnostics|Exceedance Probability 1.5C|CICERO-SCM'	3	2	4	0	6	10	9	0	43	10	44	0	2		133			10			REMIND		REMIND
'AR6 climate diagnostics|Exceedance Probability 1.5C|FaIRv1.6.2'	3	2	4	0	6	10	9	0	43	10	44	0	2		133			10			REMIND		REMIND
'AR6 climate diagnostics|Exceedance Probability 1.5C|MAGICCv7.5.3'	3	2	4	0	6	10	9	0	43	10	44	0	2		133			10			REMIND		REMIND
'AR6 climate diagnostics|Exceedance Probability 2.0C|CICERO-SCM'	3	2	4	0	6	10	9	0	43	10	44	0	2		133			10			REMIND		REMIND
'AR6 climate diagnostics|Exceedance Probability 2.0C|FaIRv1.6.2'	3	2	4	0	6	10	9	0	43	10	44	0	2		133			10			REMIND		REMIND
'AR6 climate diagnostics|Exceedance Probability 2.0C|MAGICCv7.5.3'	3	2	4	0	6	10	9	0	43	10	44	0	2		133			10			REMIND		REMIND
'AR6 climate diagnostics|Exceedance Probability 2.5C|CICERO-SCM'	3	2	4	0	6	10	9	0	43	10	44	0	2		133			10			REMIND		REMIND
'AR6 climate diagnostics|Exceedance Probability 2.5C|FaIRv1.6.2'	3	2	4	0	6	10	9	0	43	10	44	0	2		133			10			REMIND		REMIND
'AR6 climate diagnostics|Exceedance Probability 2.5C|MAGICCv7.5.3'	3	2	4	0	6	10	9	0	43	10	44	0	2		133			10			REMIND		REMIND
'AR6 climate diagnostics|Exceedance Probability 3.0C|CICERO-SCM'	3	2	4	0	6	10	9	0	43	10	44	0	2		133			10			REMIND		REMIND
'AR6 climate diagnostics|Exceedance Probability 3.0C|FaIRv1.6.2'	3	2	4	0	6	10	9	0	43	10	44	0	2		133			10			REMIND		REMIND
'AR6 climate diagnostics|Exceedance Probability 3.0C|MAGICCv7.5.3'	3	2	4	0	6	10	9	0	43	10	44	0	2		133			10			REMIND		REMIND
'AR6 climate diagnostics|Infilled|Emissions|CH4'	3	2	4	0	6	10	9	0	43	10	44	0	2		133			10			REMIND		REMIND
'AR6 climate diagnostics|Infilled|Emissions|CO2'	3	2	4	0	6	10	9	0	43	10	44	0	2		133			10			REMIND		REMIND
'AR6 climate diagnostics|Infilled|Emissions|F-Gases'	3	0	0	0	6	10	9	0	39	10	44	0	2		123			8			REMIND		REMIND
'AR6 climate diagnostics|Infilled|Emissions|Kyoto Gases (AR5-GWP100)'	3	2	4	0	6	10	9	0	43	10	44	0	2		133			10			REMIND		REMIND
'AR6 climate diagnostics|Infilled|Emissions|Kyoto Gases (AR6-GWP100)'	3	2	4	0	6	10	9	0	43	10	44	0	2		133			10			REMIND		REMIND
'AR6 climate diagnostics|Infilled|Emissions|N2O'	3	2	4	0	6	10	9	0	43	10	44	0	2		133			10			REMIND		REMIND
'AR6 climate diagnostics|Native-with-Infilled|Emissions|Kyoto Gases (AR5-GWP100)'	3	2	4	0	6	10	9	0	43	10	44	0	2		133			10			REMIND		REMIND
'AR6 climate diagnostics|Native-with-Infilled|Emissions|Kyoto Gases (AR6-GWP100)'	3	2	4	0	6	10	9	0	43	10	44	0	2		133			10			REMIND		REMIND
'AR6 climate diagnostics|Surface Temperature (GSAT)|CICERO-SCM|10.0th Percentile'	3	2	4	0	6	10	9	0	43	10	44	0	2		133			10			REMIND		REMIND
'AR6 climate diagnostics|Surface Temperature (GSAT)|CICERO-SCM|16.7th Percentile'	3	2	4	0	6	10	9	0	43	10	44	0	2		133			10			REMIND		REMIND
'AR6 climate diagnostics|Surface Temperature (GSAT)|CICERO-SCM|33.0th Percentile'	3	2	4	0	6	10	9	0	43	10	44	0	2		133			10			REMIND		REMIND
'AR6 climate diagnostics|Surface Temperature (GSAT)|CICERO-SCM|5.0th Percentile'	3	2	4	0	6	10	9	0	43	10	44	0	2		133			10			REMIND		REMIND
'AR6 climate diagnostics|Surface Temperature (GSAT)|CICERO-SCM|50.0th Percentile'	3	2	4	0	6	10	9	0	43	10	44	0	2		133			10			REMIND		REMIND
'AR6 climate diagnostics|Surface Temperature (GSAT)|CICERO-SCM|67.0th Percentile'	3	2	4	0	6	10	9	0	43	10	44	0	2		133			10			REMIND		REMIND
'AR6 climate diagnostics|Surface Temperature (GSAT)|CICERO-SCM|83.3th Percentile'	3	2	4	0	6	10	9	0	43	10	44	0	2		133			10			REMIND		REMIND
'AR6 climate diagnostics|Surface Temperature (GSAT)|CICERO-SCM|90.0th Percentile'	3	2	4	0	6	10	9	0	43	10	44	0	2		133			10			REMIND		REMIND
'AR6 climate diagnostics|Surface Temperature (GSAT)|CICERO-SCM|95.0th Percentile'	3	2	4	0	6	10	9	0	43	10	44	0	2		133			10			REMIND		REMIND
'AR6 climate diagnostics|Surface Temperature (GSAT)|FaIRv1.6.2|10.0th Percentile'	3	2	4	0	6	10	9	0	43	10	44	0	2		133			10			REMIND		REMIND
'AR6 climate diagnostics|Surface Temperature (GSAT)|FaIRv1.6.2|16.7th Percentile'	3	2	4	0	6	10	9	0	43	10	44	0	2		133			10			REMIND		REMIND
'AR6 climate diagnostics|Surface Temperature (GSAT)|FaIRv1.6.2|33.0th Percentile'	3	2	4	0	6	10	9	0	43	10	44	0	2		133			10			REMIND		REMIND
'AR6 climate diagnostics|Surface Temperature (GSAT)|FaIRv1.6.2|5.0th Percentile'	3	2	4	0	6	10	9	0	43	10	44	0	2		133			10			REMIND		REMIND
'AR6 climate diagnostics|Surface Temperature (GSAT)|FaIRv1.6.2|50.0th Percentile'	3	2	4	0	6	10	9	0	43	10	44	0	2		133			10			REMIND		REMIND
'AR6 climate diagnostics|Surface Temperature (GSAT)|FaIRv1.6.2|67.0th Percentile'	3	2	4	0	6	10	9	0	43	10	44	0	2		133			10			REMIND		REMIND
'AR6 climate diagnostics|Surface Temperature (GSAT)|FaIRv1.6.2|83.3th Percentile'	3	2	4	0	6	10	9	0	43	10	44	0	2		133			10			REMIND		REMIND
'AR6 climate diagnostics|Surface Temperature (GSAT)|FaIRv1.6.2|90.0th Percentile'	3	2	4	0	6	10	9	0	43	10	44	0	2		133			10			REMIND		REMIND
'AR6 climate diagnostics|Surface Temperature (GSAT)|FaIRv1.6.2|95.0th Percentile'	3	2	4	0	6	10	9	0	43	10	44	0	2		133			10			REMIND		REMIND
'AR6 climate diagnostics|Surface Temperature (GSAT)|MAGICCv7.5.3|10.0th Percentile'	3	2	4	0	6	10	9	0	43	10	44	0	2		133			10			REMIND		REMIND
'AR6 climate diagnostics|Surface Temperature (GSAT)|MAGICCv7.5.3|16.7th Percentile'	3	2	4	0	6	10	9	0	43	10	44	0	2		133			10			REMIND		REMIND
'AR6 climate diagnostics|Surface Temperature (GSAT)|MAGICCv7.5.3|33.0th Percentile'	3	2	4	0	6	10	9	0	43	10	44	0	2		133			10			REMIND		REMIND
'AR6 climate diagnostics|Surface Temperature (GSAT)|MAGICCv7.5.3|5.0th Percentile'	3	2	4	0	6	10	9	0	43	10	44	0	2		133			10			REMIND		REMIND
'AR6 climate diagnostics|Surface Temperature (GSAT)|MAGICCv7.5.3|50.0th Percentile'	3	2	4	0	6	10	9	0	43	10	44	0	2		133			10			REMIND		REMIND
'AR6 climate diagnostics|Surface Temperature (GSAT)|MAGICCv7.5.3|67.0th Percentile'	3	2	4	0	6	10	9	0	43	10	44	0	2		133			10			REMIND		REMIND
'AR6 climate diagnostics|Surface Temperature (GSAT)|MAGICCv7.5.3|83.3th Percentile'	3	2	4	0	6	10	9	0	43	10	44	0	2		133			10			REMIND		REMIND
'AR6 climate diagnostics|Surface Temperature (GSAT)|MAGICCv7.5.3|90.0th Percentile'	3	2	4	0	6	10	9	0	43	10	44	0	2		133			10			REMIND		REMIND
'AR6 climate diagnostics|Surface Temperature (GSAT)|MAGICCv7.5.3|95.0th Percentile'	3	2	4	0	6	10	9	0	43	10	44	0	2		133			10			REMIND		REMIND
'Agricultural Demand'	3	0	0	0	6	0	7	0	39	0	30	0	1		86			6			MESSAGE		MESSAGE
'Agricultural Demand|Crops'	0	0	0	0	2	0	7	0	24	0	14	0	1		48			5			MESSAGE		MESSAGE
'Agricultural Demand|Crops|Energy'	0	0	0	0	6	0	7	0	24	0	25	0	1		63			5			REMIND		REMIND
'Agricultural Demand|Crops|Energy|1st generation'	0	0	0	0	2	0	7	0	24	0	12	0	1		46			5			MESSAGE		MESSAGE
'Agricultural Demand|Crops|Energy|2nd generation'	0	0	0	0	2	0	7	0	24	0	12	0	1		46			5			MESSAGE		MESSAGE
'Agricultural Demand|Crops|Feed'	0	0	0	0	6	0	7	0	24	0	25	0	1		63			5			REMIND		REMIND
'Agricultural Demand|Crops|Food'	0	0	0	0	2	0	7	0	24	0	25	0	1		59			5			REMIND		REMIND
'Agricultural Demand|Crops|Other'	0	0	0	0	6	0	7	0	24	0	25	0	1		63			5			REMIND		REMIND
'Agricultural Demand|Livestock'	0	0	0	0	6	0	7	0	24	0	14	0	1		52			5			MESSAGE		MESSAGE
'Agricultural Demand|Livestock|Food'	0	0	0	0	2	0	7	0	24	0	25	0	1		59			5			REMIND		REMIND
'Agricultural Demand|Livestock|Other'	0	0	0	0	6	0	7	0	24	0	25	0	1		63			5			REMIND		REMIND
'Agricultural Production'	3	0	0	0	0	0	7	0	39	0	30	0	1		80			5			MESSAGE		MESSAGE
'Agricultural Production|Energy'	3	0	0	0	0	0	7	0	35	0	12	0	1		58			5			MESSAGE		MESSAGE
'Agricultural Production|Energy|Crops'	3	0	0	0	0	0	7	0	35	0	30	0	1		76			5			MESSAGE		MESSAGE
'Agricultural Production|Energy|Residues'	0	0	0	0	0	0	7	0	0	0	12	0	0		19			2			REMIND		REMIND
'Agricultural Production|Non-Energy'	3	0	0	0	0	0	7	0	35	5	12	0	1		63			6			MESSAGE		MESSAGE
'Agricultural Production|Non-Energy|Crops'	3	0	0	0	0	0	7	0	35	5	30	0	1		81			6			MESSAGE		MESSAGE
'Agricultural Production|Non-Energy|Livestock'	3	0	0	0	0	0	7	0	35	5	30	0	1		81			6			MESSAGE		MESSAGE
'Capacity Additions|Electricity|Biomass'	3	0	0	0	2	10	7	0	35	5	34	0	1		97			8			MESSAGE		MESSAGE
'Capacity Additions|Electricity|Biomass|w/ CCS'	3	0	0	0	2	10	7	0	35	5	18	0	1		81			8			MESSAGE		MESSAGE
'Capacity Additions|Electricity|Biomass|w/o CCS'	3	0	0	0	2	10	7	0	35	5	18	0	1		81			8			MESSAGE		MESSAGE
'Capacity Additions|Electricity|Coal'	3	0	0	0	2	10	7	0	35	5	34	0	1		97			8			MESSAGE		MESSAGE
'Capacity Additions|Electricity|Coal|w/ CCS'	3	0	0	0	2	10	7	0	35	5	34	0	1		97			8			MESSAGE		MESSAGE
'Capacity Additions|Electricity|Coal|w/o CCS'	3	0	0	0	2	10	7	0	35	5	34	0	1		97			8			MESSAGE		MESSAGE
'Capacity Additions|Electricity|Fossil'	3	0	0	0	2	10	7	0	35	5	34	0	1		97			8			MESSAGE		MESSAGE
'Capacity Additions|Electricity|Gas'	3	0	0	0	2	10	7	0	35	5	34	0	1		97			8			MESSAGE		MESSAGE
'Capacity Additions|Electricity|Gas|w/ CCS'	3	0	0	0	2	10	7	0	35	5	34	0	1		97			8			MESSAGE		MESSAGE
'Capacity Additions|Electricity|Gas|w/o CCS'	3	0	0	0	2	10	7	0	35	5	34	0	1		97			8			MESSAGE		MESSAGE
'Capacity Additions|Electricity|Geothermal'	3	0	0	0	2	10	0	0	35	5	0	0	0		55			5			MESSAGE		MESSAGE
'Capacity Additions|Electricity|Hydro'	3	0	0	0	0	10	7	0	35	5	34	0	1		95			7			MESSAGE		MESSAGE
'Capacity Additions|Electricity|Non-Biomass Renewables'	3	0	0	0	2	10	7	0	35	5	34	0	1		97			8			MESSAGE		MESSAGE
'Capacity Additions|Electricity|Nuclear'	3	0	0	0	2	10	7	0	35	5	34	0	1		97			8			MESSAGE		MESSAGE
'Capacity Additions|Electricity|Oil'	3	0	0	0	2	10	7	0	35	5	0	0	1		63			7			MESSAGE		MESSAGE
'Capacity Additions|Electricity|Oil|w/ CCS'	3	0	0	0	0	0	7	0	35	5	0	0	0		50			4			MESSAGE		MESSAGE
'Capacity Additions|Electricity|Oil|w/o CCS'	3	0	0	0	2	10	7	0	35	5	0	0	1		63			7			MESSAGE		MESSAGE
'Capacity Additions|Electricity|Renewables (incl. Biomass)'	3	0	0	0	2	10	7	0	35	5	34	0	1		97			8			MESSAGE		MESSAGE
'Capacity Additions|Electricity|Solar'	3	0	0	0	2	10	7	0	35	5	34	0	1		97			8			MESSAGE		MESSAGE
'Capacity Additions|Electricity|Solar|CSP'	0	0	0	0	2	0	7	0	35	5	34	0	1		84			6			MESSAGE		MESSAGE
'Capacity Additions|Electricity|Solar|PV'	3	0	0	0	2	10	7	0	35	5	34	0	1		97			8			MESSAGE		MESSAGE
'Capacity Additions|Electricity|Storage Capacity'	0	0	0	0	0	0	0	0	24	0	18	0	1		43			3			MESSAGE		MESSAGE
'Capacity Additions|Electricity|Wind'	3	0	0	0	2	10	7	0	35	5	34	0	1		97			8			MESSAGE		MESSAGE
'Capacity Additions|Electricity|Wind|Offshore'	0	0	0	0	2	10	7	0	35	5	0	0	1		60			6			MESSAGE		MESSAGE
'Capacity Additions|Electricity|Wind|Onshore'	3	0	0	0	2	10	7	0	35	5	0	0	1		63			7			MESSAGE		MESSAGE
'Capacity|Electricity'	3	0	0	0	2	10	8	0	37	5	38	0	2		105			8			REMIND		REMIND
'Capacity|Electricity|Biomass'	3	0	4	0	2	10	9	0	38	9	38	0	2		115			9			MESSAGE		MESSAGE
'Capacity|Electricity|Biomass|w/ CCS'	3	0	4	0	2	10	7	0	35	5	18	0	1		85			9			MESSAGE		MESSAGE
'Capacity|Electricity|Biomass|w/o CCS'	3	0	4	0	2	10	7	0	35	5	18	0	1		85			9			MESSAGE		MESSAGE
'Capacity|Electricity|Coal'	3	0	4	0	2	10	9	0	38	9	38	0	2		115			9			MESSAGE		MESSAGE
'Capacity|Electricity|Coal|w/ CCS'	3	0	4	0	2	10	7	0	35	5	34	0	1		101			9			MESSAGE		MESSAGE
'Capacity|Electricity|Coal|w/o CCS'	3	0	4	0	2	10	7	0	35	5	34	0	1		101			9			MESSAGE		MESSAGE
'Capacity|Electricity|Fossil'	3	0	4	0	2	10	9	0	38	9	38	0	2		115			9			MESSAGE		MESSAGE
'Capacity|Electricity|Gas'	3	0	4	0	2	10	9	0	38	9	38	0	2		115			9			MESSAGE		MESSAGE
'Capacity|Electricity|Gas|w/ CCS'	3	0	4	0	2	10	7	0	35	5	34	0	1		101			9			MESSAGE		MESSAGE
'Capacity|Electricity|Gas|w/o CCS'	3	0	4	0	2	10	7	0	35	5	34	0	1		101			9			MESSAGE		MESSAGE
'Capacity|Electricity|Geothermal'	3	0	4	0	2	10	0	0	38	9	20	0	0		86			7			MESSAGE		MESSAGE
'Capacity|Electricity|Hydro'	3	0	4	0	2	10	9	0	38	9	38	0	2		115			9			MESSAGE		MESSAGE
'Capacity|Electricity|Non-Biomass Renewables'	3	0	4	0	2	10	9	0	38	9	38	0	2		115			9			MESSAGE		MESSAGE
'Capacity|Electricity|Nuclear'	3	0	4	0	2	10	9	0	38	9	38	0	2		115			9			MESSAGE		MESSAGE
'Capacity|Electricity|Ocean'	0	0	0	0	0	0	0	0	0	4	0	0	0		4			1			POLES		0
'Capacity|Electricity|Oil'	3	0	4	0	2	10	9	0	38	9	21	0	2		98			9			MESSAGE		MESSAGE
'Capacity|Electricity|Oil|w/ CCS'	3	0	0	0	0	0	7	0	35	5	0	0	0		50			4			MESSAGE		MESSAGE
'Capacity|Electricity|Oil|w/o CCS'	3	0	0	0	2	10	7	0	35	5	18	0	1		81			8			MESSAGE		MESSAGE
'Capacity|Electricity|Other'	3	0	0	0	0	0	8	0	0	9	5	0	0		25			4			POLES		POLES
'Capacity|Electricity|Peak Demand'	0	0	0	0	0	0	7	0	0	5	18	0	0		30			3			REMIND		REMIND
'Capacity|Electricity|Renewables (incl. Biomass)'	3	0	4	0	2	10	9	0	38	9	38	0	2		115			9			MESSAGE		MESSAGE
'Capacity|Electricity|Solar'	3	0	4	0	2	10	9	0	38	9	38	0	2		115			9			MESSAGE		MESSAGE
'Capacity|Electricity|Solar|CSP'	0	0	4	0	2	0	9	0	38	9	36	0	2		100			7			MESSAGE		MESSAGE
'Capacity|Electricity|Solar|PV'	3	0	4	0	2	10	9	0	38	9	36	0	2		113			9			MESSAGE		MESSAGE
'Capacity|Electricity|Storage'	3	0	0	0	0	0	7	0	24	0	34	0	1		69			5			REMIND		REMIND
'Capacity|Electricity|Storage Capacity'	3	0	0	0	0	0	7	0	0	0	0	0	1		11			3			IMAGE		IMAGE
'Capacity|Electricity|Wind'	3	0	4	0	2	10	9	0	38	9	38	0	2		115			9			MESSAGE		MESSAGE
'Capacity|Electricity|Wind|Offshore'	0	0	4	0	2	10	9	0	38	9	0	0	2		74			7			MESSAGE		MESSAGE
'Capacity|Electricity|Wind|Onshore'	3	0	4	0	2	10	9	0	38	9	0	0	2		77			8			MESSAGE		MESSAGE
'Capacity|Gases|Biomass'	0	0	0	0	0	0	0	0	35	0	0	0	0		35			1			MESSAGE		0
'Capacity|Gases|Biomass|w/o CCS'	0	0	0	0	0	0	0	0	35	0	0	0	0		35			1			MESSAGE		0
'Capacity|Gases|Coal'	0	0	0	0	0	0	0	0	35	0	0	0	0		35			1			MESSAGE		0
'Capacity|Gases|Coal|w/o CCS'	0	0	0	0	0	0	0	0	35	0	0	0	0		35			1			MESSAGE		0
'Capacity|Hydrogen|Biomass'	0	0	0	0	0	0	7	0	35	0	0	0	0		42			2			MESSAGE		MESSAGE
'Capacity|Hydrogen|Biomass|w/ CCS'	0	0	0	0	0	0	7	0	35	0	0	0	0		42			2			MESSAGE		MESSAGE
'Capacity|Hydrogen|Biomass|w/o CCS'	0	0	0	0	0	0	7	0	35	0	0	0	0		42			2			MESSAGE		MESSAGE
'Capacity|Hydrogen|Coal'	0	0	0	0	0	0	7	0	35	0	0	0	0		42			2			MESSAGE		MESSAGE
'Capacity|Hydrogen|Coal|w/ CCS'	0	0	0	0	0	0	7	0	35	0	0	0	0		42			2			MESSAGE		MESSAGE
'Capacity|Hydrogen|Coal|w/o CCS'	0	0	0	0	0	0	7	0	35	0	0	0	0		42			2			MESSAGE		MESSAGE
'Capacity|Hydrogen|Electricity'	0	0	0	0	0	0	7	0	35	0	0	0	1		43			3			MESSAGE		MESSAGE
'Capacity|Hydrogen|Gas'	0	0	0	0	0	0	7	0	35	0	0	0	1		43			3			MESSAGE		MESSAGE
'Capacity|Hydrogen|Gas|w/ CCS'	0	0	0	0	0	0	7	0	35	0	0	0	1		43			3			MESSAGE		MESSAGE
'Capacity|Hydrogen|Gas|w/o CCS'	0	0	0	0	0	0	7	0	35	0	0	0	1		43			3			MESSAGE		MESSAGE
'Capacity|Liquids|Biomass'	0	0	0	0	0	0	0	0	35	0	0	0	0		35			1			MESSAGE		0
'Capacity|Liquids|Biomass|w/ CCS'	3	0	0	0	0	0	0	0	35	0	0	0	0		38			2			MESSAGE		MESSAGE
'Capacity|Liquids|Biomass|w/o CCS'	3	0	0	0	0	0	0	0	35	0	0	0	0		38			2			MESSAGE		MESSAGE
'Capacity|Liquids|Coal'	0	0	0	0	0	0	0	0	35	0	0	0	0		35			1			MESSAGE		0
'Capacity|Liquids|Coal|w/ CCS'	0	0	0	0	0	0	0	0	35	0	0	0	0		35			1			MESSAGE		0
'Capacity|Liquids|Coal|w/o CCS'	0	0	0	0	0	0	0	0	35	0	0	0	0		35			1			MESSAGE		0
'Capacity|Liquids|Gas'	0	0	0	0	0	0	0	0	35	0	0	0	0		35			1			MESSAGE		0
'Capacity|Liquids|Gas|w/ CCS'	0	0	0	0	0	0	0	0	35	0	0	0	0		35			1			MESSAGE		0
'Capacity|Liquids|Gas|w/o CCS'	0	0	0	0	0	0	0	0	35	0	0	0	0		35			1			MESSAGE		0
'Capacity|Liquids|Oil'	3	0	0	0	0	0	0	0	35	0	0	0	0		38			2			MESSAGE		MESSAGE
'Capacity|Transportation|Aviation|Freight'	0	0	0	0	0	0	0	0	0	0	0	0	0		0			0			0		0
'Capacity|Transportation|Aviation|Passenger'	0	0	0	0	0	0	0	0	0	0	0	0	0		0			0			0		0
'Capacity|Transportation|Maritime|Freight'	0	0	0	0	0	0	0	0	0	0	0	0	0		0			0			0		0
'Capacity|Transportation|Maritime|Passenger'	0	0	0	0	0	0	0	0	0	0	0	0	0		0			0			0		0
'Capacity|Transportation|Rail|Freight'	0	0	0	0	0	0	0	0	0	0	0	0	0		0			0			0		0
'Capacity|Transportation|Rail|Passenger'	0	0	0	0	0	0	0	0	0	0	0	0	0		0			0			0		0
'Capacity|Transportation|Road|Freight'	0	0	0	0	0	0	0	0	0	0	0	0	0		0			0			0		0
'Capacity|Transportation|Road|Passenger'	0	0	0	0	0	0	0	0	0	0	0	0	0		0			0			0		0
'Capital Cost|Electricity|Biomass|w/ CCS'	3	0	0	0	2	10	0	0	0	5	36	0	1		57			6			REMIND		REMIND
'Capital Cost|Electricity|Biomass|w/o CCS'	3	0	0	0	2	10	0	0	0	5	36	0	1		57			6			REMIND		REMIND
'Capital Cost|Electricity|Coal|w/ CCS'	3	0	0	0	2	10	0	0	0	5	36	0	1		57			6			REMIND		REMIND
'Capital Cost|Electricity|Coal|w/o CCS'	3	0	0	0	2	10	0	0	0	5	36	0	1		57			6			REMIND		REMIND
'Capital Cost|Electricity|Gas|w/ CCS'	3	0	0	0	2	10	0	0	0	5	36	0	1		57			6			REMIND		REMIND
'Capital Cost|Electricity|Gas|w/o CCS'	3	0	0	0	2	10	0	0	0	5	36	0	1		57			6			REMIND		REMIND
'Capital Cost|Electricity|Geothermal'	3	0	0	0	2	10	0	0	35	5	36	0	0		91			6			REMIND		REMIND
'Capital Cost|Electricity|Hydro'	3	0	0	0	0	10	0	0	35	5	36	0	0		89			5			REMIND		REMIND
'Capital Cost|Electricity|Nuclear'	3	0	0	0	2	10	0	0	35	5	36	0	1		92			7			REMIND		REMIND
'Capital Cost|Electricity|Solar|CSP'	0	0	0	0	2	0	0	0	0	5	36	0	1		44			4			REMIND		REMIND
'Capital Cost|Electricity|Solar|PV'	3	0	0	0	2	10	0	0	35	5	36	0	1		92			7			REMIND		REMIND
'Capital Cost|Electricity|Wind|Offshore'	0	0	0	0	2	10	0	0	35	5	36	0	1		89			6			REMIND		REMIND
'Capital Cost|Electricity|Wind|Onshore'	3	0	0	0	2	10	0	0	35	5	18	0	1		74			7			MESSAGE		MESSAGE
'Capital Cost|Gases|Biomass|w/ CCS'	0	0	0	0	0	0	0	0	0	0	0	0	0		0			0			0		0
'Capital Cost|Gases|Biomass|w/o CCS'	0	0	0	0	0	0	0	0	35	0	36	0	0		71			2			REMIND		REMIND
'Capital Cost|Gases|Coal|w/ CCS'	0	0	0	0	0	0	0	0	0	0	0	0	0		0			0			0		0
'Capital Cost|Gases|Coal|w/o CCS'	0	0	0	0	0	0	0	0	35	0	36	0	0		71			2			REMIND		REMIND
'Capital Cost|Hydrogen|Biomass|w/ CCS'	0	0	0	0	0	0	0	0	35	4	36	0	0		75			3			REMIND		REMIND
'Capital Cost|Hydrogen|Biomass|w/o CCS'	0	0	0	0	0	0	0	0	35	4	36	0	0		75			3			REMIND		REMIND
'Capital Cost|Hydrogen|Coal|w/ CCS'	0	0	0	0	0	0	0	0	35	4	36	0	0		75			3			REMIND		REMIND
'Capital Cost|Hydrogen|Coal|w/o CCS'	0	0	0	0	0	0	0	0	35	4	36	0	0		75			3			REMIND		REMIND
'Capital Cost|Hydrogen|Electricity'	0	0	0	0	0	0	0	0	35	5	36	0	0		76			3			REMIND		REMIND
'Capital Cost|Hydrogen|Gas|w/ CCS'	0	0	0	0	0	0	0	0	35	4	36	0	0		75			3			REMIND		REMIND
'Capital Cost|Hydrogen|Gas|w/o CCS'	0	0	0	0	0	0	0	0	35	4	36	0	0		75			3			REMIND		REMIND
'Capital Cost|Liquids|Biomass|w/ CCS'	3	0	0	0	0	0	0	0	35	4	36	0	0		78			4			REMIND		REMIND
'Capital Cost|Liquids|Biomass|w/o CCS'	3	0	0	0	0	0	0	0	35	4	36	0	0		78			4			REMIND		REMIND
'Capital Cost|Liquids|Coal|w/ CCS'	0	0	0	0	0	0	0	0	35	4	36	0	0		75			3			REMIND		REMIND
'Capital Cost|Liquids|Coal|w/o CCS'	0	0	0	0	0	0	0	0	35	4	36	0	0		75			3			REMIND		REMIND
'Capital Cost|Liquids|Gas|w/ CCS'	0	0	0	0	0	0	0	0	35	4	0	0	0		39			2			MESSAGE		MESSAGE
'Capital Cost|Liquids|Gas|w/o CCS'	0	0	0	0	0	0	0	0	35	4	0	0	0		39			2			MESSAGE		MESSAGE
'Capital Cost|Liquids|Oil'	3	0	0	0	0	0	0	0	0	0	36	0	0		39			2			REMIND		REMIND
'Capital Formation'	0	0	0	0	0	0	0	0	0	0	18	0	0		18			1			REMIND		0
'Capital Stock'	3	0	0	0	0	0	0	0	0	0	0	0	1		4			2			AIM		AIM
'Carbon Intensity|Production|Cement'	0	0	0	0	0	0	0	0	0	0	1	0	0		1			1			REMIND		0
'Carbon Intensity|Production|Cement|Fossil|Energy|Demand|Industry'	0	0	0	0	0	0	0	0	0	0	0	0	0		0			0			0		0
'Carbon Intensity|Production|Cement|Industrial Processes'	0	0	0	0	0	0	0	0	0	0	1	0	0		1			1			REMIND		0
'Carbon Intensity|Production|Chemicals'	0	0	0	0	0	0	0	0	0	0	0	0	0		0			0			0		0
'Carbon Intensity|Production|Chemicals|Fossil|Energy|Demand|Industry'	0	0	0	0	0	0	0	0	0	0	0	0	0		0			0			0		0
'Carbon Intensity|Production|Chemicals|Industrial Processes'	0	0	0	0	0	0	0	0	0	0	0	0	0		0			0			0		0
'Carbon Intensity|Production|Steel'	0	0	0	0	0	0	0	0	0	0	1	0	0		1			1			REMIND		0
'Carbon Intensity|Production|Steel|Fossil|Energy|Demand|Industry'	0	0	0	0	0	0	0	0	0	0	0	0	0		0			0			0		0
'Carbon Intensity|Production|Steel|Industrial Processes'	0	0	0	0	0	0	0	0	0	0	0	0	0		0			0			0		0
'Carbon Sequestration|CCS'	3	0	4	0	6	10	9	0	43	10	44	0	2		131			9			REMIND		REMIND
'Carbon Sequestration|CCS|Biomass'	3	2	4	0	6	0	9	0	43	10	44	0	2		123			9			REMIND		REMIND
'Carbon Sequestration|CCS|Biomass|Energy'	0	0	0	0	0	0	7	0	0	0	7	0	0		14			2			IMAGE		IMAGE
'Carbon Sequestration|CCS|Biomass|Energy|Demand|Industry'	0	0	0	0	2	0	8	0	0	9	40	0	0		59			4			REMIND		REMIND
'Carbon Sequestration|CCS|Biomass|Energy|Supply'	3	0	4	0	2	0	8	0	36	9	40	0	1		103			8			REMIND		REMIND
'Carbon Sequestration|CCS|Biomass|Energy|Supply|Electricity'	3	0	4	0	2	0	8	0	36	9	40	0	1		103			8			REMIND		REMIND
'Carbon Sequestration|CCS|Biomass|Energy|Supply|Gases'	0	0	4	0	0	0	0	0	0	4	40	0	0		48			3			REMIND		REMIND
'Carbon Sequestration|CCS|Biomass|Energy|Supply|Hydrogen'	0	0	0	0	2	0	8	0	36	9	40	0	0		95			5			REMIND		REMIND
'Carbon Sequestration|CCS|Biomass|Energy|Supply|Liquids'	3	0	4	0	2	0	7	0	36	9	40	0	0		101			7			REMIND		REMIND
'Carbon Sequestration|CCS|Biomass|Energy|Supply|Other'	0	0	0	0	0	0	8	0	0	4	18	0	0		30			3			REMIND		REMIND
'Carbon Sequestration|CCS|Biomass|Industrial Processes'	0	0	0	0	0	0	7	0	0	0	0	0	0		7			1			IMAGE		0
'Carbon Sequestration|CCS|Fossil'	3	0	4	0	6	10	9	0	42	9	27	0	2		112			9			MESSAGE		MESSAGE
'Carbon Sequestration|CCS|Fossil|Energy'	0	0	0	0	0	0	7	0	0	0	0	0	0		7			1			IMAGE		0
'Carbon Sequestration|CCS|Fossil|Energy|Demand|Industry'	3	0	0	0	2	0	8	0	0	9	40	0	1		63			6			REMIND		REMIND
'Carbon Sequestration|CCS|Fossil|Energy|Supply'	3	0	4	0	2	10	8	0	36	9	36	0	1		109			9			MESSAGE		MESSAGE
'Carbon Sequestration|CCS|Fossil|Energy|Supply|Electricity'	3	0	4	0	2	10	8	0	36	9	0	0	1		73			8			MESSAGE		MESSAGE
'Carbon Sequestration|CCS|Fossil|Energy|Supply|Gases'	0	0	4	0	0	0	1	0	0	4	0	0	1		10			4			COFFEE		COFFEE
'Carbon Sequestration|CCS|Fossil|Energy|Supply|Hydrogen'	0	0	0	0	2	0	8	0	36	9	0	0	0		55			4			MESSAGE		MESSAGE
'Carbon Sequestration|CCS|Fossil|Energy|Supply|Liquids'	3	0	4	0	0	0	1	0	36	9	0	0	0		53			5			MESSAGE		MESSAGE
'Carbon Sequestration|CCS|Fossil|Energy|Supply|Other'	0	0	0	0	0	0	8	0	0	4	0	0	0		12			2			IMAGE		IMAGE
'Carbon Sequestration|CCS|Fossil|Industrial Processes'	0	0	0	0	0	0	0	0	0	0	0	0	0		0			0			0		0
'Carbon Sequestration|CCS|Industrial Processes'	3	0	0	0	6	0	7	0	35	5	18	0	0		74			6			MESSAGE		MESSAGE
'Carbon Sequestration|Direct Air Capture'	0	2	4	0	0	0	0	0	0	5	20	0	1		32			5			REMIND		REMIND
'Carbon Sequestration|Enhanced Weathering'	0	2	0	0	0	0	0	0	0	0	20	0	0		22			2			REMIND		REMIND
'Carbon Sequestration|Feedstocks'	0	0	0	0	0	0	7	0	0	0	0	0	0		7			1			IMAGE		0
'Carbon Sequestration|Land Use'	0	2	4	0	0	0	9	0	26	9	30	0	2		82			7			REMIND		REMIND
'Carbon Sequestration|Land Use|Afforestation'	3	2	0	0	0	0	7	0	24	0	30	0	1		67			6			REMIND		REMIND
'Carbon Sequestration|Land Use|Biochar'	0	2	0	0	0	0	0	0	0	0	0	0	0		2			1			C-ROADS		0
'Carbon Sequestration|Land Use|Other'	0	0	0	0	0	0	0	0	0	0	0	0	0		0			0			0		0
'Carbon Sequestration|Land Use|Soil Carbon Management'	0	2	0	0	0	0	0	0	0	0	0	0	0		2			1			C-ROADS		0
'Carbon Sequestration|Other'	0	0	4	0	0	10	7	0	0	0	0	0	0		21			3			GEM-E3		GEM-E3
'Carbon Utilization|CCS|Industry'	0	0	0	0	0	0	0	0	0	0	7	0	0		7			1			REMIND		0
'Concentration|CH4'	3	2	0	0	0	0	8	0	2	0	36	0	0		51			5			REMIND		REMIND
'Concentration|CO2'	3	2	0	0	6	0	8	0	2	0	36	0	0		57			6			REMIND		REMIND
'Concentration|N2O'	3	2	0	0	0	0	8	0	2	0	36	0	0		51			5			REMIND		REMIND
'Consumption'	3	0	0	0	0	10	9	0	43	0	44	0	2		111			6			REMIND		REMIND
'Cumulative Capacity|Electricity|Biomass'	0	0	0	0	0	10	7	0	35	5	34	0	1		92			6			MESSAGE		MESSAGE
'Cumulative Capacity|Electricity|Biomass|w/ CCS'	3	0	4	0	0	10	7	0	35	5	34	0	1		99			8			MESSAGE		MESSAGE
'Cumulative Capacity|Electricity|Biomass|w/o CCS'	3	0	4	0	0	10	7	0	35	5	34	0	1		99			8			MESSAGE		MESSAGE
'Cumulative Capacity|Electricity|Coal'	0	0	0	0	0	10	7	0	35	5	34	0	1		92			6			MESSAGE		MESSAGE
'Cumulative Capacity|Electricity|Coal|w/ CCS'	3	0	4	0	0	10	7	0	35	5	34	0	1		99			8			MESSAGE		MESSAGE
'Cumulative Capacity|Electricity|Coal|w/o CCS'	3	0	4	0	0	10	7	0	35	5	34	0	1		99			8			MESSAGE		MESSAGE
'Cumulative Capacity|Electricity|Fossil'	0	0	0	0	0	10	7	0	35	5	34	0	1		92			6			MESSAGE		MESSAGE
'Cumulative Capacity|Electricity|Gas'	0	0	0	0	0	10	7	0	35	5	34	0	1		92			6			MESSAGE		MESSAGE
'Cumulative Capacity|Electricity|Gas|w/ CCS'	3	0	4	0	0	10	7	0	35	5	34	0	1		99			8			MESSAGE		MESSAGE
'Cumulative Capacity|Electricity|Gas|w/o CCS'	3	0	4	0	0	10	7	0	35	5	34	0	1		99			8			MESSAGE		MESSAGE
'Cumulative Capacity|Electricity|Geothermal'	3	0	4	0	0	10	0	0	35	5	0	0	0		57			5			MESSAGE		MESSAGE
'Cumulative Capacity|Electricity|Hydro'	3	0	4	0	0	10	7	0	35	5	34	0	1		99			8			MESSAGE		MESSAGE
'Cumulative Capacity|Electricity|Non-Biomass Renewables'	3	0	4	0	0	10	7	0	35	5	34	0	1		99			8			MESSAGE		MESSAGE
'Cumulative Capacity|Electricity|Nuclear'	3	0	4	0	0	10	7	0	35	5	34	0	1		99			8			MESSAGE		MESSAGE
'Cumulative Capacity|Electricity|Ocean'	0	0	0	0	0	0	0	0	0	0	0	0	0		0			0			0		0
'Cumulative Capacity|Electricity|Oil'	0	0	0	0	0	10	7	0	35	5	0	0	1		58			5			MESSAGE		MESSAGE
'Cumulative Capacity|Electricity|Oil|w/ CCS'	3	0	4	0	0	0	7	0	35	5	0	0	0		54			5			MESSAGE		MESSAGE
'Cumulative Capacity|Electricity|Oil|w/o CCS'	3	0	4	0	0	10	7	0	35	5	0	0	1		65			7			MESSAGE		MESSAGE
'Cumulative Capacity|Electricity|Other'	0	0	0	0	0	0	7	0	0	0	0	0	0		7			1			IMAGE		0
'Cumulative Capacity|Electricity|Renewables (incl. Biomass)'	3	0	4	0	0	10	7	0	35	5	34	0	1		99			8			MESSAGE		MESSAGE
'Cumulative Capacity|Electricity|Solar'	0	0	0	0	0	10	7	0	35	5	18	0	1		76			6			MESSAGE		MESSAGE
'Cumulative Capacity|Electricity|Solar|CSP'	0	0	4	0	0	0	7	0	35	5	34	0	1		86			6			MESSAGE		MESSAGE
'Cumulative Capacity|Electricity|Solar|PV'	3	0	4	0	0	10	7	0	35	5	34	0	1		99			8			MESSAGE		MESSAGE
'Cumulative Capacity|Electricity|Wind'	0	0	0	0	0	10	7	0	35	5	34	0	1		92			6			MESSAGE		MESSAGE
'Cumulative Capacity|Electricity|Wind|Offshore'	0	0	4	0	0	10	7	0	35	5	0	0	1		62			6			MESSAGE		MESSAGE
'Cumulative Capacity|Electricity|Wind|Onshore'	3	0	4	0	0	10	7	0	35	5	0	0	1		65			7			MESSAGE		MESSAGE
'Cumulative Capacity|Gases|Biomass'	0	0	0	0	0	0	0	0	35	0	0	0	0		35			1			MESSAGE		0
'Cumulative Capacity|Gases|Biomass|w/o CCS'	0	0	0	0	0	0	0	0	35	0	0	0	0		35			1			MESSAGE		0
'Cumulative Capacity|Gases|Coal'	0	0	0	0	0	0	0	0	35	0	0	0	0		35			1			MESSAGE		0
'Cumulative Capacity|Gases|Coal|w/o CCS'	0	0	0	0	0	0	0	0	35	0	0	0	0		35			1			MESSAGE		0
'Cumulative Capacity|Hydrogen|Biomass'	0	0	0	0	0	0	0	0	35	0	18	0	0		53			2			MESSAGE		MESSAGE
'Cumulative Capacity|Hydrogen|Biomass|w/ CCS'	0	0	0	0	0	0	0	0	35	0	18	0	0		53			2			MESSAGE		MESSAGE
'Cumulative Capacity|Hydrogen|Biomass|w/o CCS'	0	0	0	0	0	0	0	0	35	0	18	0	0		53			2			MESSAGE		MESSAGE
'Cumulative Capacity|Hydrogen|Coal'	0	0	0	0	0	0	0	0	35	0	0	0	0		35			1			MESSAGE		0
'Cumulative Capacity|Hydrogen|Coal|w/ CCS'	0	0	0	0	0	0	0	0	35	0	0	0	0		35			1			MESSAGE		0
'Cumulative Capacity|Hydrogen|Coal|w/o CCS'	0	0	0	0	0	0	0	0	35	0	0	0	0		35			1			MESSAGE		0
'Cumulative Capacity|Hydrogen|Electricity'	0	0	0	0	0	0	0	0	35	0	18	0	1		54			3			MESSAGE		MESSAGE
'Cumulative Capacity|Hydrogen|Gas'	0	0	0	0	0	0	0	0	35	0	0	0	1		36			2			MESSAGE		MESSAGE
'Cumulative Capacity|Hydrogen|Gas|w/ CCS'	0	0	0	0	0	0	0	0	35	0	0	0	1		36			2			MESSAGE		MESSAGE
'Cumulative Capacity|Hydrogen|Gas|w/o CCS'	0	0	0	0	0	0	0	0	35	0	0	0	1		36			2			MESSAGE		MESSAGE
'Cumulative Capacity|Liquids|Biomass'	0	0	0	0	0	0	0	0	35	0	0	0	0		35			1			MESSAGE		0
'Cumulative Capacity|Liquids|Biomass|w/ CCS'	0	0	0	0	0	0	0	0	35	0	0	0	0		35			1			MESSAGE		0
'Cumulative Capacity|Liquids|Biomass|w/o CCS'	0	0	0	0	0	0	0	0	35	0	0	0	0		35			1			MESSAGE		0
'Cumulative Capacity|Liquids|Coal'	0	0	0	0	0	0	0	0	35	0	0	0	0		35			1			MESSAGE		0
'Cumulative Capacity|Liquids|Coal|w/ CCS'	0	0	0	0	0	0	0	0	35	0	0	0	0		35			1			MESSAGE		0
'Cumulative Capacity|Liquids|Coal|w/o CCS'	0	0	0	0	0	0	0	0	35	0	0	0	0		35			1			MESSAGE		0
'Cumulative Capacity|Liquids|Gas'	0	0	0	0	0	0	0	0	35	0	0	0	0		35			1			MESSAGE		0
'Cumulative Capacity|Liquids|Gas|w/ CCS'	0	0	0	0	0	0	0	0	35	0	0	0	0		35			1			MESSAGE		0
'Cumulative Capacity|Liquids|Gas|w/o CCS'	0	0	0	0	0	0	0	0	35	0	0	0	0		35			1			MESSAGE		0
'Cumulative Capacity|Liquids|Oil'	0	0	0	0	0	0	0	0	35	0	0	0	0		35			1			MESSAGE		0
'Discount rate|Economy'	0	0	0	0	0	0	0	0	0	0	0	0	0		0			0			0		0
'Discount rate|Electricity'	0	0	0	0	0	0	0	0	0	0	0	0	0		0			0			0		0
'Discount rate|Energy Supply'	0	0	0	0	0	0	0	0	0	0	0	0	0		0			0			0		0
'Discount rate|Industry'	0	0	0	0	0	0	0	0	0	0	0	0	0		0			0			0		0
'Discount rate|Mobility'	0	0	0	0	0	0	0	0	0	0	0	0	0		0			0			0		0
'Discount rate|Residential and Commercial'	0	0	0	0	0	0	0	0	0	0	0	0	0		0			0			0		0
'Discount rate|Social'	0	0	0	0	0	0	0	0	0	0	0	0	0		0			0			0		0
'Discount rate|Transport Infrastructure'	0	0	0	0	0	0	0	0	0	0	0	0	0		0			0			0		0
'Ecotoxicity|Freshwater|Electricity'	0	0	0	0	0	0	1	0	1	0	1	0	0		3			3			IMAGE		IMAGE
'Ecotoxicity|Marine|Electricity'	0	0	0	0	0	0	1	0	1	0	1	0	0		3			3			IMAGE		IMAGE
'Efficiency|Electricity|Biomass|w/ CCS'	3	0	0	0	0	0	0	0	0	5	34	0	1		43			4			REMIND		REMIND
'Efficiency|Electricity|Biomass|w/o CCS'	3	0	0	0	0	0	0	0	0	5	34	0	1		43			4			REMIND		REMIND
'Efficiency|Electricity|Coal|w/ CCS'	3	0	0	0	0	0	0	0	0	5	34	0	1		43			4			REMIND		REMIND
'Efficiency|Electricity|Coal|w/o CCS'	3	0	0	0	0	0	0	0	0	5	34	0	1		43			4			REMIND		REMIND
'Efficiency|Electricity|Gas|w/ CCS'	3	0	0	0	0	0	0	0	0	5	34	0	1		43			4			REMIND		REMIND
'Efficiency|Electricity|Gas|w/o CCS'	3	0	0	0	0	0	0	0	0	5	34	0	1		43			4			REMIND		REMIND
'Efficiency|Gases|Biomass|w/o CCS'	0	0	0	0	0	0	0	0	35	0	34	0	0		69			2			MESSAGE		MESSAGE
'Efficiency|Gases|Coal|w/o CCS'	0	0	0	0	0	0	0	0	35	0	34	0	0		69			2			MESSAGE		MESSAGE
'Efficiency|Hydrogen|Biomass|w/ CCS'	0	0	0	0	0	0	0	0	35	4	34	0	0		73			3			MESSAGE		MESSAGE
'Efficiency|Hydrogen|Biomass|w/o CCS'	0	0	0	0	0	0	0	0	35	4	34	0	0		73			3			MESSAGE		MESSAGE
'Efficiency|Hydrogen|Coal|w/ CCS'	0	0	0	0	0	0	0	0	35	4	34	0	0		73			3			MESSAGE		MESSAGE
'Efficiency|Hydrogen|Coal|w/o CCS'	0	0	0	0	0	0	0	0	35	4	34	0	0		73			3			MESSAGE		MESSAGE
'Efficiency|Hydrogen|Electricity'	0	0	0	0	0	0	6	0	35	4	34	0	0		79			4			MESSAGE		MESSAGE
'Efficiency|Hydrogen|Gas|w/ CCS'	0	0	0	0	0	0	0	0	35	4	34	0	0		73			3			MESSAGE		MESSAGE
'Efficiency|Hydrogen|Gas|w/o CCS'	0	0	0	0	0	0	0	0	35	4	34	0	0		73			3			MESSAGE		MESSAGE
'Efficiency|Liquids|Biomass|w/ CCS'	3	0	0	0	0	0	0	0	35	4	34	0	0		76			4			MESSAGE		MESSAGE
'Efficiency|Liquids|Biomass|w/o CCS'	3	0	0	0	0	0	0	0	35	4	34	0	0		76			4			MESSAGE		MESSAGE
'Efficiency|Liquids|Coal|w/ CCS'	0	0	0	0	0	0	0	0	35	4	34	0	0		73			3			MESSAGE		MESSAGE
'Efficiency|Liquids|Coal|w/o CCS'	0	0	0	0	0	0	0	0	35	4	34	0	0		73			3			MESSAGE		MESSAGE
'Efficiency|Liquids|Gas|w/ CCS'	0	0	0	0	0	0	0	0	35	4	0	0	0		39			2			MESSAGE		MESSAGE
'Efficiency|Liquids|Gas|w/o CCS'	0	0	0	0	0	0	0	0	35	4	0	0	0		39			2			MESSAGE		MESSAGE
'Efficiency|Liquids|Oil'	0	0	0	0	0	0	0	0	0	0	34	0	0		34			1			REMIND		0
'Emissions|BC'	3	2	0	0	2	0	9	0	43	6	40	0	2		107			8			MESSAGE		MESSAGE
'Emissions|BC|AFOLU'	3	0	0	0	2	0	7	0	36	1	36	0	1		86			7			MESSAGE		MESSAGE
'Emissions|BC|AFOLU|Agriculture'	0	0	0	0	0	0	0	0	11	0	2	0	0		13			2			MESSAGE		MESSAGE
'Emissions|BC|AFOLU|Land'	0	0	0	0	0	0	0	0	11	0	0	0	0		11			1			MESSAGE		0
'Emissions|BC|Energy'	3	0	0	0	2	0	7	0	36	1	36	0	1		86			7			MESSAGE		MESSAGE
'Emissions|BC|Energy|Demand|Industry'	3	0	0	0	2	0	7	0	36	1	36	0	1		86			7			MESSAGE		MESSAGE
'Emissions|BC|Energy|Demand|Residential and Commercial'	0	0	0	0	2	0	7	0	35	1	33	0	1		79			6			MESSAGE		MESSAGE
'Emissions|BC|Energy|Demand|Residential and Commercial|Commercial'	0	0	0	0	0	0	7	0	0	0	0	0	0		7			1			IMAGE		0
'Emissions|BC|Energy|Demand|Residential and Commercial|Residential'	0	0	0	0	0	0	7	0	0	0	0	0	0		7			1			IMAGE		0
'Emissions|BC|Energy|Demand|Transportation'	3	0	0	0	2	0	7	0	36	1	36	0	1		86			7			MESSAGE		MESSAGE
'Emissions|BC|Energy|Supply'	3	0	0	0	2	0	7	0	36	1	36	0	1		86			7			MESSAGE		MESSAGE
'Emissions|BC|Industrial Processes'	0	0	0	0	0	0	0	0	11	0	0	0	0		11			1			MESSAGE		0
'Emissions|BC|Other'	0	0	0	0	0	0	0	0	0	0	36	0	1		37			2			REMIND		REMIND
'Emissions|BC|Waste'	0	0	0	0	0	0	0	0	11	0	7	0	0		18			2			MESSAGE		MESSAGE
'Emissions|C2F6'	0	0	0	0	6	0	7	0	0	0	0	0	0		13			2			IMAGE		IMAGE
'Emissions|CF4'	0	0	0	0	2	0	7	0	11	0	0	0	0		20			3			MESSAGE		MESSAGE
'Emissions|CH4'	3	2	4	0	6	10	9	0	43	10	44	0	2		133			10			REMIND		REMIND
'Emissions|CH4|AFOLU'	3	0	4	0	6	0	9	0	39	10	42	0	2		115			8			REMIND		REMIND
'Emissions|CH4|AFOLU|Agriculture'	3	0	0	0	2	0	7	0	35	0	18	0	1		66			6			MESSAGE		MESSAGE
'Emissions|CH4|AFOLU|Agriculture|Livestock'	3	0	0	0	0	0	7	0	35	0	18	0	0		63			4			MESSAGE		MESSAGE
'Emissions|CH4|AFOLU|Agriculture|Livestock|Enteric Fermentation'	0	0	0	0	0	0	7	0	35	0	18	0	0		60			3			MESSAGE		MESSAGE
'Emissions|CH4|AFOLU|Agriculture|Livestock|Manure Management'	3	0	0	0	0	0	7	0	35	0	18	0	0		63			4			MESSAGE		MESSAGE
'Emissions|CH4|AFOLU|Agriculture|Rice'	0	0	0	0	0	0	7	0	35	0	18	0	0		60			3			MESSAGE		MESSAGE
'Emissions|CH4|AFOLU|Land'	0	0	0	0	0	0	7	0	11	0	0	0	0		18			2			MESSAGE		MESSAGE
'Emissions|CH4|Energy'	3	0	4	0	6	0	8	0	38	1	38	0	1		99			8			MESSAGE		MESSAGE
'Emissions|CH4|Energy|Demand|Industry'	3	0	0	0	2	0	8	0	37	5	0	0	0		55			5			MESSAGE		MESSAGE
'Emissions|CH4|Energy|Demand|Residential and Commercial'	0	0	0	0	2	0	8	0	35	10	15	0	0		70			5			MESSAGE		MESSAGE
'Emissions|CH4|Energy|Demand|Residential and Commercial|Commercial'	0	0	0	0	0	0	7	0	0	0	0	0	0		7			1			IMAGE		0
'Emissions|CH4|Energy|Demand|Residential and Commercial|Residential'	0	0	0	0	0	0	7	0	0	0	0	0	0		7			1			IMAGE		0
'Emissions|CH4|Energy|Demand|Transportation'	3	0	0	0	2	0	8	0	37	5	0	0	0		55			5			MESSAGE		MESSAGE
'Emissions|CH4|Energy|Supply'	3	0	0	0	2	0	8	0	37	10	40	0	1		101			7			REMIND		REMIND
'Emissions|CH4|Industrial Processes'	0	0	0	0	0	0	7	0	11	0	0	0	0		18			2			MESSAGE		MESSAGE
'Emissions|CH4|Industrial Processes|Chemicals'	0	0	0	0	0	0	7	0	0	0	0	0	0		7			1			IMAGE		0
'Emissions|CH4|Industrial Processes|Steel'	0	0	0	0	0	0	7	0	0	0	0	0	0		7			1			IMAGE		0
'Emissions|CH4|Other'	0	0	4	0	2	0	7	0	0	5	36	0	1		55			6			REMIND		REMIND
'Emissions|CH4|Waste'	0	0	0	0	0	0	7	0	11	0	7	0	0		25			3			MESSAGE		MESSAGE
'Emissions|CO'	3	2	0	0	6	0	8	0	41	6	40	0	1		107			8			MESSAGE		MESSAGE
'Emissions|CO2'	3	2	4	0	6	10	9	0	43	10	44	0	2		133			10			REMIND		REMIND
'Emissions|CO2|AFOLU'	3	2	4	0	6	10	9	0	43	10	44	0	2		133			10			REMIND		REMIND
'Emissions|CO2|AFOLU|Agriculture'	0	0	0	0	0	0	0	0	11	0	0	0	0		11			1			MESSAGE		0
'Emissions|CO2|AFOLU|Land'	0	0	0	0	0	0	7	0	0	0	0	0	0		7			1			IMAGE		0
'Emissions|CO2|Energy'	3	0	4	0	6	10	8	0	37	5	36	0	1		110			9			MESSAGE		MESSAGE
'Emissions|CO2|Energy and Industrial Processes'	3	2	4	0	6	10	9	0	43	10	44	0	2		133			10			REMIND		REMIND
'Emissions|CO2|Energy|Demand'	3	0	4	0	6	10	9	0	43	10	42	0	1		128			9			MESSAGE		MESSAGE
'Emissions|CO2|Energy|Demand|AFOFI'	3	0	0	0	0	10	0	0	36	9	0	0	1		59			5			MESSAGE		MESSAGE
'Emissions|CO2|Energy|Demand|Industry'	3	0	4	0	6	10	9	0	43	10	40	0	2		127			9			MESSAGE		MESSAGE
'Emissions|CO2|Energy|Demand|Industry|Cement'	0	0	0	0	0	0	0	0	0	0	0	0	0		0			0			0		0
'Emissions|CO2|Energy|Demand|Industry|Chemicals'	0	0	0	0	0	0	6	0	0	0	0	0	0		6			1			IMAGE		0
'Emissions|CO2|Energy|Demand|Industry|Chemicals|Ammonia'	0	0	0	0	0	0	0	0	0	0	0	0	0		0			0			0		0
'Emissions|CO2|Energy|Demand|Industry|Chemicals|High value chemicals'	0	0	0	0	0	0	0	0	0	0	0	0	0		0			0			0		0
'Emissions|CO2|Energy|Demand|Industry|Chemicals|Methanol'	0	0	0	0	0	0	0	0	0	0	0	0	0		0			0			0		0
'Emissions|CO2|Energy|Demand|Industry|Chemicals|Other'	0	0	0	0	0	0	0	0	0	0	0	0	0		0			0			0		0
'Emissions|CO2|Energy|Demand|Industry|Non-ferrous metals'	0	0	0	0	0	0	0	0	0	0	0	0	0		0			0			0		0
'Emissions|CO2|Energy|Demand|Industry|Other'	0	0	0	0	0	0	0	0	0	0	0	0	0		0			0			0		0
'Emissions|CO2|Energy|Demand|Industry|Pulp and Paper'	0	0	0	0	0	0	7	0	0	0	0	0	0		7			1			IMAGE		0
'Emissions|CO2|Energy|Demand|Industry|Steel'	0	0	0	0	0	0	7	0	0	0	0	0	0		7			1			IMAGE		0
'Emissions|CO2|Energy|Demand|Other Sector'	0	0	0	0	0	0	7	0	24	0	0	0	1		32			3			MESSAGE		MESSAGE
'Emissions|CO2|Energy|Demand|Residential and Commercial'	0	0	0	0	6	10	9	0	37	10	40	0	2		114			7			REMIND		REMIND
'Emissions|CO2|Energy|Demand|Residential and Commercial|Commercial'	3	0	4	0	6	10	7	0	0	5	0	0	1		36			7			GEM-E3		GEM-E3
'Emissions|CO2|Energy|Demand|Residential and Commercial|Commercial|Heating'	0	0	0	0	0	0	0	0	0	0	0	0	0		0			0			0		0
'Emissions|CO2|Energy|Demand|Residential and Commercial|Commercial|Heating|Cooking'	0	0	0	0	0	0	0	0	0	0	0	0	0		0			0			0		0
'Emissions|CO2|Energy|Demand|Residential and Commercial|Commercial|Heating|Space'	0	0	0	0	0	0	0	0	0	0	0	0	0		0			0			0		0
'Emissions|CO2|Energy|Demand|Residential and Commercial|Commercial|Heating|Water'	0	0	0	0	0	0	0	0	0	0	0	0	0		0			0			0		0
'Emissions|CO2|Energy|Demand|Residential and Commercial|Residential'	3	0	4	0	6	10	7	0	0	5	0	0	1		36			7			GEM-E3		GEM-E3
'Emissions|CO2|Energy|Demand|Residential and Commercial|Residential|Heating'	0	0	0	0	0	0	0	0	0	0	0	0	0		0			0			0		0
'Emissions|CO2|Energy|Demand|Residential and Commercial|Residential|Heating|Cooking'	0	0	0	0	0	0	0	0	0	0	0	0	0		0			0			0		0
'Emissions|CO2|Energy|Demand|Residential and Commercial|Residential|Heating|Space'	0	0	0	0	0	0	0	0	0	0	0	0	0		0			0			0		0
'Emissions|CO2|Energy|Demand|Residential and Commercial|Residential|Heating|Water'	0	0	0	0	0	0	0	0	0	0	0	0	0		0			0			0		0
'Emissions|CO2|Energy|Demand|Transportation'	3	0	4	0	6	10	8	0	41	10	42	0	1		125			9			REMIND		REMIND
'Emissions|CO2|Energy|Demand|Transportation|Aviation'	0	0	0	0	0	0	7	0	11	0	0	0	0		18			2			MESSAGE		MESSAGE
'Emissions|CO2|Energy|Demand|Transportation|Aviation|Freight'	0	0	0	0	0	0	7	0	0	0	0	0	0		7			1			IMAGE		0
'Emissions|CO2|Energy|Demand|Transportation|Aviation|Passenger'	0	0	0	0	0	0	7	0	0	0	0	0	0		7			1			IMAGE		0
'Emissions|CO2|Energy|Demand|Transportation|Freight'	0	0	0	0	2	0	0	0	0	0	1	0	1		4			3			GCAM		GCAM
'Emissions|CO2|Energy|Demand|Transportation|Maritime'	0	0	0	0	0	0	7	0	0	0	0	0	0		7			1			IMAGE		0
'Emissions|CO2|Energy|Demand|Transportation|Maritime|Freight'	0	0	0	0	0	0	0	0	0	0	0	0	0		0			0			0		0
'Emissions|CO2|Energy|Demand|Transportation|Maritime|Passenger'	0	0	0	0	0	0	0	0	0	0	0	0	0		0			0			0		0
'Emissions|CO2|Energy|Demand|Transportation|Passenger'	0	0	0	0	2	0	0	0	0	0	1	0	1		4			3			GCAM		GCAM
'Emissions|CO2|Energy|Demand|Transportation|Rail'	0	0	0	0	0	0	7	0	0	0	0	0	0		7			1			IMAGE		0
'Emissions|CO2|Energy|Demand|Transportation|Rail|Freight'	0	0	0	0	0	0	7	0	0	0	0	0	0		7			1			IMAGE		0
'Emissions|CO2|Energy|Demand|Transportation|Rail|Passenger'	0	0	0	0	0	0	7	0	0	0	0	0	0		7			1			IMAGE		0
'Emissions|CO2|Energy|Demand|Transportation|Road'	0	0	0	0	0	0	7	0	0	0	0	0	0		7			1			IMAGE		0
'Emissions|CO2|Energy|Demand|Transportation|Road|Freight'	0	0	0	0	0	0	7	0	0	0	0	0	0		7			1			IMAGE		0
'Emissions|CO2|Energy|Demand|Transportation|Road|Passenger'	0	0	0	0	0	0	7	0	0	0	0	0	0		7			1			IMAGE		0
'Emissions|CO2|Energy|Demand|Transportation|Road|Passenger|2W&3W'	0	0	0	0	0	0	0	0	0	0	0	0	0		0			0			0		0
'Emissions|CO2|Energy|Demand|Transportation|Road|Passenger|Bus'	0	0	0	0	0	0	0	0	0	0	0	0	0		0			0			0		0
'Emissions|CO2|Energy|Demand|Transportation|Road|Passenger|LDV'	0	0	0	0	0	0	7	0	0	0	6	0	0		13			2			IMAGE		IMAGE
'Emissions|CO2|Energy|Supply'	3	0	4	0	6	10	9	0	43	10	42	0	2		129			9			MESSAGE		MESSAGE
'Emissions|CO2|Energy|Supply|Electricity'	3	0	4	0	6	10	9	0	43	10	44	0	2		131			9			REMIND		REMIND
'Emissions|CO2|Energy|Supply|Gases'	0	0	4	0	4	10	8	0	25	4	36	0	0		91			7			REMIND		REMIND
'Emissions|CO2|Energy|Supply|Heat'	0	0	0	0	6	0	8	0	36	0	40	0	0		90			4			REMIND		REMIND
'Emissions|CO2|Energy|Supply|Liquids'	0	0	4	0	4	10	8	0	25	4	36	0	0		91			7			REMIND		REMIND
'Emissions|CO2|Energy|Supply|Other Sector'	0	0	0	0	4	0	0	0	0	0	7	0	0		11			2			REMIND		REMIND
'Emissions|CO2|Energy|Supply|Solids'	0	0	0	0	4	10	8	0	25	4	36	0	0		87			6			REMIND		REMIND
'Emissions|CO2|Industrial Processes'	3	0	4	0	6	10	7	0	35	5	36	0	1		107			9			REMIND		REMIND
'Emissions|CO2|Industrial Processes|Cement'	0	0	0	0	0	0	7	0	0	0	0	0	0		7			1			IMAGE		0
'Emissions|CO2|Industrial Processes|Chemicals'	0	0	0	0	0	0	0	0	0	0	0	0	0		0			0			0		0
'Emissions|CO2|Industrial Processes|Chemicals|Ammonia'	0	0	0	0	0	0	0	0	0	0	0	0	0		0			0			0		0
'Emissions|CO2|Industrial Processes|Chemicals|High value chemicals'	0	0	0	0	0	0	0	0	0	0	0	0	0		0			0			0		0
'Emissions|CO2|Industrial Processes|Chemicals|Methanol'	0	0	0	0	0	0	0	0	0	0	0	0	0		0			0			0		0
'Emissions|CO2|Industrial Processes|Chemicals|Other'	0	0	0	0	0	0	0	0	0	0	0	0	0		0			0			0		0
'Emissions|CO2|Industrial Processes|Non-ferrous metals'	0	0	0	0	0	0	0	0	0	0	0	0	0		0			0			0		0
'Emissions|CO2|Industrial Processes|Other'	0	0	0	0	0	0	0	0	0	0	0	0	0		0			0			0		0
'Emissions|CO2|Industrial Processes|Pulp and Paper'	0	0	0	0	0	0	7	0	0	0	0	0	0		7			1			IMAGE		0
'Emissions|CO2|Industrial Processes|Steel'	0	0	0	0	0	0	7	0	0	0	0	0	0		7			1			IMAGE		0
'Emissions|CO2|Other'	0	2	0	0	0	0	0	0	4	5	20	0	0		31			4			REMIND		REMIND
'Emissions|CO2|Waste'	0	0	0	0	0	0	0	0	11	0	0	0	0		11			1			MESSAGE		0
'Emissions|CO|AFOLU'	3	0	0	0	2	0	7	0	36	1	36	0	1		86			7			MESSAGE		MESSAGE
'Emissions|CO|AFOLU|Agriculture'	0	0	0	0	0	0	0	0	11	0	0	0	0		11			1			MESSAGE		0
'Emissions|CO|AFOLU|Land'	0	0	0	0	0	0	0	0	11	0	0	0	0		11			1			MESSAGE		0
'Emissions|CO|Energy'	3	0	0	0	2	0	7	0	36	1	36	0	1		86			7			MESSAGE		MESSAGE
'Emissions|CO|Energy|Demand|Industry'	3	0	0	0	2	0	7	0	36	1	36	0	1		86			7			MESSAGE		MESSAGE
'Emissions|CO|Energy|Demand|Residential and Commercial'	0	0	0	0	2	0	7	0	35	1	33	0	1		79			6			MESSAGE		MESSAGE
'Emissions|CO|Energy|Demand|Residential and Commercial|Commercial'	0	0	0	0	0	0	7	0	0	0	0	0	0		7			1			IMAGE		0
'Emissions|CO|Energy|Demand|Residential and Commercial|Residential'	0	0	0	0	0	0	7	0	0	0	0	0	0		7			1			IMAGE		0
'Emissions|CO|Energy|Demand|Transportation'	3	0	0	0	2	0	7	0	36	1	36	0	1		86			7			MESSAGE		MESSAGE
'Emissions|CO|Energy|Supply'	3	0	0	0	2	0	7	0	36	1	36	0	1		86			7			MESSAGE		MESSAGE
'Emissions|CO|Industrial Processes'	0	0	0	0	0	0	7	0	11	0	0	0	0		18			2			MESSAGE		MESSAGE
'Emissions|CO|Other'	0	0	0	0	0	0	0	0	0	0	5	0	1		6			2			REMIND		REMIND
'Emissions|CO|Waste'	0	0	0	0	0	0	0	0	11	0	7	0	0		18			2			MESSAGE		MESSAGE
'Emissions|F-Gases'	3	0	0	0	6	10	9	0	39	10	44	0	2		123			8			REMIND		REMIND
'Emissions|HFC'	3	2	0	0	6	10	8	0	37	10	38	0	1		115			9			REMIND		REMIND
'Emissions|HFC|HFC125'	3	2	0	0	6	0	8	0	37	5	8	0	1		70			8			MESSAGE		MESSAGE
'Emissions|HFC|HFC134a'	3	2	0	0	6	0	8	0	37	5	8	0	1		70			8			MESSAGE		MESSAGE
'Emissions|HFC|HFC143a'	3	2	0	0	6	0	8	0	37	5	8	0	1		70			8			MESSAGE		MESSAGE
'Emissions|HFC|HFC227ea'	3	2	0	0	6	0	8	0	37	5	8	0	1		70			8			MESSAGE		MESSAGE
'Emissions|HFC|HFC23'	3	2	0	0	6	0	8	0	37	5	8	0	1		70			8			MESSAGE		MESSAGE
'Emissions|HFC|HFC245fa'	3	2	0	0	6	0	8	0	37	0	2	0	1		59			7			MESSAGE		MESSAGE
'Emissions|HFC|HFC32'	3	2	0	0	6	0	8	0	37	5	8	0	1		70			8			MESSAGE		MESSAGE
'Emissions|HFC|HFC43-10'	3	2	0	0	4	0	8	0	37	5	8	0	1		68			8			MESSAGE		MESSAGE
'Emissions|HFC|Industrial Processes'	0	0	0	0	0	0	0	0	0	0	0	0	0		0			0			0		0
'Emissions|Kyoto Gases'	3	2	4	0	6	10	8	0	42	6	40	0	2		123			10			MESSAGE		MESSAGE
'Emissions|N2O'	3	2	4	0	6	10	9	0	43	10	44	0	2		133			10			REMIND		REMIND
'Emissions|N2O|AFOLU'	3	0	4	0	6	0	9	0	39	10	42	0	2		115			8			REMIND		REMIND
'Emissions|N2O|AFOLU|Agriculture'	3	0	0	0	2	0	7	0	35	0	18	0	1		66			6			MESSAGE		MESSAGE
'Emissions|N2O|AFOLU|Agriculture|Livestock|Manure Management'	3	0	0	0	0	0	7	0	35	0	18	0	0		63			4			MESSAGE		MESSAGE
'Emissions|N2O|AFOLU|Agriculture|Managed Soils'	3	0	0	0	0	0	7	0	35	0	18	0	0		63			4			MESSAGE		MESSAGE
'Emissions|N2O|AFOLU|Land'	0	0	0	0	0	0	7	0	11	0	0	0	0		18			2			MESSAGE		MESSAGE
'Emissions|N2O|Energy'	3	0	4	0	6	0	8	0	38	6	36	0	1		102			8			MESSAGE		MESSAGE
'Emissions|N2O|Energy|Demand|Residential and Commercial|Commercial'	0	0	0	0	0	0	7	0	0	0	0	0	0		7			1			IMAGE		0
'Emissions|N2O|Energy|Demand|Residential and Commercial|Residential'	0	0	0	0	0	0	7	0	0	0	0	0	0		7			1			IMAGE		0
'Emissions|N2O|Energy|Demand|Transportation'	0	0	0	0	0	0	7	0	11	0	7	0	0		25			3			MESSAGE		MESSAGE
'Emissions|N2O|Industrial Processes'	0	0	0	0	0	0	7	0	11	0	20	0	0		38			3			REMIND		REMIND
'Emissions|N2O|Industrial Processes|Chemicals'	0	0	0	0	0	0	7	0	0	0	0	0	0		7			1			IMAGE		0
'Emissions|N2O|Other'	0	0	4	0	2	0	7	0	0	6	23	0	1		43			6			REMIND		REMIND
'Emissions|N2O|Waste'	0	0	0	0	0	0	7	0	11	0	7	0	0		25			3			MESSAGE		MESSAGE
'Emissions|NH3'	3	2	0	0	6	0	8	0	41	6	40	0	1		107			8			MESSAGE		MESSAGE
'Emissions|NH3|AFOLU'	3	0	0	0	2	0	7	0	36	1	36	0	1		86			7			MESSAGE		MESSAGE
'Emissions|NH3|AFOLU|Agriculture'	0	0	0	0	0	0	7	0	11	0	0	0	0		18			2			MESSAGE		MESSAGE
'Emissions|NH3|AFOLU|Land'	0	0	0	0	0	0	0	0	11	0	0	0	0		11			1			MESSAGE		0
'Emissions|NH3|Energy'	3	0	0	0	2	0	7	0	36	1	20	0	1		70			7			MESSAGE		MESSAGE
'Emissions|NH3|Energy|Demand|Industry'	3	0	0	0	2	0	7	0	36	1	20	0	1		70			7			MESSAGE		MESSAGE
'Emissions|NH3|Energy|Demand|Residential and Commercial'	0	0	0	0	2	0	7	0	35	1	20	0	1		66			6			MESSAGE		MESSAGE
'Emissions|NH3|Energy|Demand|Transportation'	3	0	0	0	2	0	7	0	36	1	20	0	1		70			7			MESSAGE		MESSAGE
'Emissions|NH3|Energy|Supply'	3	0	0	0	2	0	7	0	36	1	20	0	1		70			7			MESSAGE		MESSAGE
'Emissions|NH3|Industrial Processes'	0	0	0	0	0	0	0	0	11	0	0	0	0		11			1			MESSAGE		0
'Emissions|NH3|Other'	0	0	0	0	0	0	0	0	0	0	7	0	0		7			1			REMIND		0
'Emissions|NH3|Waste'	0	0	0	0	0	0	0	0	11	0	7	0	0		18			2			MESSAGE		MESSAGE
'Emissions|NOx'	3	2	0	0	6	0	8	0	41	6	44	0	1		111			8			REMIND		REMIND
'Emissions|NOx|AFOLU'	3	0	0	0	2	0	7	0	36	1	36	0	1		86			7			MESSAGE		MESSAGE
'Emissions|NOx|AFOLU|Agriculture'	0	0	0	0	0	0	7	0	11	0	0	0	0		18			2			MESSAGE		MESSAGE
'Emissions|NOx|AFOLU|Land'	0	0	0	0	0	0	0	0	11	0	0	0	0		11			1			MESSAGE		0
'Emissions|NOx|Energy'	3	0	0	0	2	0	7	0	36	1	36	0	1		86			7			MESSAGE		MESSAGE
'Emissions|NOx|Energy|Demand|Industry'	3	0	0	0	2	0	7	0	35	0	36	0	1		84			6			REMIND		REMIND
'Emissions|NOx|Energy|Demand|Residential and Commercial'	0	0	0	0	2	0	7	0	35	0	33	0	1		78			5			MESSAGE		MESSAGE
'Emissions|NOx|Energy|Demand|Residential and Commercial|Commercial'	0	0	0	0	0	0	7	0	0	0	0	0	0		7			1			IMAGE		0
'Emissions|NOx|Energy|Demand|Residential and Commercial|Residential'	0	0	0	0	0	0	7	0	0	0	0	0	0		7			1			IMAGE		0
'Emissions|NOx|Energy|Demand|Transportation'	3	0	0	0	2	0	7	0	36	1	36	0	1		86			7			MESSAGE		MESSAGE
'Emissions|NOx|Energy|Supply'	3	0	0	0	2	0	7	0	36	1	36	0	1		86			7			MESSAGE		MESSAGE
'Emissions|NOx|Industrial Processes'	0	0	0	0	0	0	7	0	11	0	0	0	0		18			2			MESSAGE		MESSAGE
'Emissions|NOx|Other'	0	0	0	0	0	0	0	0	0	0	23	0	1		24			2			REMIND		REMIND
'Emissions|NOx|Waste'	0	0	0	0	0	0	0	0	11	0	7	0	0		18			2			MESSAGE		MESSAGE
'Emissions|OC'	3	2	0	0	6	0	8	0	41	6	44	0	1		111			8			REMIND		REMIND
'Emissions|OC|AFOLU'	3	0	0	0	2	0	7	0	36	1	36	0	1		86			7			MESSAGE		MESSAGE
'Emissions|OC|AFOLU|Agriculture'	0	0	0	0	0	0	0	0	11	0	0	0	0		11			1			MESSAGE		0
'Emissions|OC|AFOLU|Land'	0	0	0	0	0	0	0	0	11	0	0	0	0		11			1			MESSAGE		0
'Emissions|OC|Energy'	3	0	0	0	2	0	7	0	36	1	36	0	1		86			7			MESSAGE		MESSAGE
'Emissions|OC|Energy|Demand|Industry'	3	0	0	0	2	0	7	0	36	1	36	0	1		86			7			MESSAGE		MESSAGE
'Emissions|OC|Energy|Demand|Residential and Commercial'	0	0	0	0	2	0	7	0	35	1	33	0	1		79			6			MESSAGE		MESSAGE
'Emissions|OC|Energy|Demand|Residential and Commercial|Commercial'	0	0	0	0	0	0	7	0	0	0	0	0	0		7			1			IMAGE		0
'Emissions|OC|Energy|Demand|Residential and Commercial|Residential'	0	0	0	0	0	0	7	0	0	0	0	0	0		7			1			IMAGE		0
'Emissions|OC|Energy|Demand|Transportation'	3	0	0	0	2	0	7	0	36	1	36	0	1		86			7			MESSAGE		MESSAGE
'Emissions|OC|Energy|Supply'	3	0	0	0	2	0	7	0	36	1	36	0	1		86			7			MESSAGE		MESSAGE
'Emissions|OC|Industrial Processes'	0	0	0	0	0	0	0	0	11	0	0	0	0		11			1			MESSAGE		0
'Emissions|OC|Other'	0	0	0	0	0	0	0	0	0	0	23	0	1		24			2			REMIND		REMIND
'Emissions|OC|Waste'	0	0	0	0	0	0	0	0	11	0	7	0	0		18			2			MESSAGE		MESSAGE
'Emissions|PFC'	3	2	0	0	6	10	8	0	2	10	42	0	1		84			9			REMIND		REMIND
'Emissions|PFC|C2F6'	0	0	0	0	0	0	7	0	1	0	0	0	1		9			3			IMAGE		IMAGE
'Emissions|PFC|C6F14'	0	0	0	0	0	0	7	0	1	0	0	0	1		9			3			IMAGE		IMAGE
'Emissions|PFC|CF4'	0	0	0	0	0	0	7	0	25	0	0	0	1		33			3			MESSAGE		MESSAGE
'Emissions|PM2.5'	0	0	0	0	0	0	1	0	1	0	1	0	0		3			3			IMAGE		IMAGE
'Emissions|SF6'	3	2	0	0	6	10	8	0	37	10	42	0	1		119			9			REMIND		REMIND
'Emissions|Sulfur'	3	2	4	0	6	10	9	0	43	10	44	0	2		133			10			REMIND		REMIND
'Emissions|Sulfur|AFOLU'	3	0	0	0	2	0	7	0	36	1	36	0	1		86			7			MESSAGE		MESSAGE
'Emissions|Sulfur|AFOLU|Agriculture'	0	0	0	0	0	0	0	0	11	0	0	0	0		11			1			MESSAGE		0
'Emissions|Sulfur|AFOLU|Land'	0	0	0	0	0	0	0	0	11	0	0	0	0		11			1			MESSAGE		0
'Emissions|Sulfur|Energy'	3	0	0	0	2	0	7	0	36	1	36	0	1		86			7			MESSAGE		MESSAGE
'Emissions|Sulfur|Energy|Demand|Industry'	3	0	0	0	2	0	7	0	36	1	36	0	1		86			7			MESSAGE		MESSAGE
'Emissions|Sulfur|Energy|Demand|Residential and Commercial'	0	0	0	0	2	0	7	0	35	1	33	0	1		79			6			MESSAGE		MESSAGE
'Emissions|Sulfur|Energy|Demand|Residential and Commercial|Commercial'	0	0	0	0	0	0	7	0	0	0	0	0	0		7			1			IMAGE		0
'Emissions|Sulfur|Energy|Demand|Residential and Commercial|Residential'	0	0	0	0	0	0	7	0	0	0	0	0	0		7			1			IMAGE		0
'Emissions|Sulfur|Energy|Demand|Transportation'	3	0	0	0	2	0	7	0	36	1	36	0	1		86			7			MESSAGE		MESSAGE
'Emissions|Sulfur|Energy|Supply'	3	0	0	0	2	0	7	0	36	1	36	0	1		86			7			MESSAGE		MESSAGE
'Emissions|Sulfur|Industrial Processes'	0	0	0	0	0	0	7	0	11	0	0	0	0		18			2			MESSAGE		MESSAGE
'Emissions|Sulfur|Other'	0	0	0	0	0	0	0	0	0	0	23	0	1		24			2			REMIND		REMIND
'Emissions|Sulfur|Waste'	0	0	0	0	0	0	0	0	11	0	7	0	0		18			2			MESSAGE		MESSAGE
'Emissions|VOC'	3	2	0	0	6	0	8	0	41	6	40	0	1		107			8			MESSAGE		MESSAGE
'Emissions|VOC|AFOLU'	3	0	0	0	2	0	7	0	36	1	36	0	1		86			7			MESSAGE		MESSAGE
'Emissions|VOC|AFOLU|Agriculture'	0	0	0	0	0	0	0	0	11	0	0	0	0		11			1			MESSAGE		0
'Emissions|VOC|AFOLU|Land'	0	0	0	0	0	0	0	0	11	0	0	0	0		11			1			MESSAGE		0
'Emissions|VOC|Energy'	3	0	0	0	2	0	7	0	36	1	36	0	1		86			7			MESSAGE		MESSAGE
'Emissions|VOC|Energy|Demand|Industry'	3	0	0	0	2	0	7	0	36	1	36	0	1		86			7			MESSAGE		MESSAGE
'Emissions|VOC|Energy|Demand|Residential and Commercial'	0	0	0	0	2	0	7	0	35	1	33	0	1		79			6			MESSAGE		MESSAGE
'Emissions|VOC|Energy|Demand|Residential and Commercial|Commercial'	0	0	0	0	0	0	7	0	0	0	0	0	0		7			1			IMAGE		0
'Emissions|VOC|Energy|Demand|Residential and Commercial|Residential'	0	0	0	0	0	0	7	0	0	0	0	0	0		7			1			IMAGE		0
'Emissions|VOC|Energy|Demand|Transportation'	3	0	0	0	2	0	7	0	36	1	36	0	1		86			7			MESSAGE		MESSAGE
'Emissions|VOC|Energy|Supply'	3	0	0	0	2	0	7	0	36	1	36	0	1		86			7			MESSAGE		MESSAGE
'Emissions|VOC|Industrial Processes'	0	0	0	0	0	0	7	0	11	0	0	0	0		18			2			MESSAGE		MESSAGE
'Emissions|VOC|Other'	0	0	0	0	0	0	0	0	0	0	23	0	1		24			2			REMIND		REMIND
'Emissions|VOC|Waste'	0	0	0	0	0	0	0	0	11	0	7	0	0		18			2			MESSAGE		MESSAGE
'Employment'	0	0	0	0	0	10	0	0	0	0	0	0	0		10			1			GEM-E3		0
'Employment|Agriculture'	0	0	0	0	0	10	0	0	0	0	0	0	0		10			1			GEM-E3		0
'Employment|Industry'	0	0	0	0	0	10	0	0	0	0	0	0	0		10			1			GEM-E3		0
'Employment|Industry|Energy'	0	0	0	0	0	0	0	0	0	0	0	0	0		0			0			0		0
'Employment|Industry|Energy Intensive'	0	0	0	0	0	10	0	0	0	0	0	0	0		10			1			GEM-E3		0
'Employment|Industry|Manufacturing'	0	0	0	0	0	0	0	0	0	0	0	0	0		0			0			0		0
'Employment|Service'	0	0	0	0	0	10	0	0	0	0	0	0	0		10			1			GEM-E3		0
'Energy Service|Residential and Commercial|Commercial|Floor Space'	0	0	0	0	0	0	0	0	0	0	0	0	0		0			0			0		0
'Energy Service|Residential and Commercial|Floor Space'	0	0	0	0	0	0	0	0	0	0	2	0	0		2			1			REMIND		0
'Energy Service|Residential and Commercial|Residential|Floor Space'	0	0	0	0	0	0	7	0	0	0	0	0	0		7			1			IMAGE		0
'Energy Service|Transportation|Aviation'	0	0	0	0	0	0	0	0	0	0	1	0	0		1			1			REMIND		0
'Energy Service|Transportation|Freight'	3	0	0	0	2	0	7	0	0	5	38	0	1		56			6			REMIND		REMIND
'Energy Service|Transportation|Freight|Aviation'	3	0	0	0	0	0	7	0	0	0	0	0	0		10			2			IMAGE		IMAGE
'Energy Service|Transportation|Freight|International Shipping'	3	0	0	0	0	0	7	0	0	0	1	0	0		11			3			IMAGE		IMAGE
'Energy Service|Transportation|Freight|Navigation'	3	0	0	0	0	0	7	0	0	0	1	0	0		11			3			IMAGE		IMAGE
'Energy Service|Transportation|Freight|Railways'	3	0	0	0	0	0	7	0	0	0	1	0	0		11			3			IMAGE		IMAGE
'Energy Service|Transportation|Freight|Road'	3	0	0	0	0	0	7	0	0	0	1	0	1		12			4			IMAGE		IMAGE
'Energy Service|Transportation|Navigation'	0	0	0	0	0	0	0	0	0	0	1	0	0		1			1			REMIND		0
'Energy Service|Transportation|Passenger'	3	0	0	0	2	0	7	0	0	5	38	0	1		56			6			REMIND		REMIND
'Energy Service|Transportation|Passenger|Aviation'	3	0	0	0	0	0	7	0	0	0	1	0	0		11			3			IMAGE		IMAGE
'Energy Service|Transportation|Passenger|Bicycling and Walking'	0	0	0	0	0	0	7	0	0	0	1	0	0		8			2			IMAGE		IMAGE
'Energy Service|Transportation|Passenger|Railways'	3	0	0	0	0	0	7	0	0	0	1	0	0		11			3			IMAGE		IMAGE
'Energy Service|Transportation|Passenger|Road'	3	0	0	0	0	0	7	0	0	0	1	0	1		12			4			IMAGE		IMAGE
'Energy Service|Transportation|Passenger|Road|2W and 3W'	0	0	0	0	0	0	0	0	0	0	0	0	0		0			0			0		0
'Energy Service|Transportation|Passenger|Road|Bus'	3	0	0	0	0	0	7	0	0	0	1	0	0		11			3			IMAGE		IMAGE
'Energy Service|Transportation|Passenger|Road|LDV'	3	0	0	0	0	0	7	0	0	0	32	0	0		42			3			REMIND		REMIND
'Energy Service|Transportation|Rail'	0	0	0	0	0	0	0	0	0	0	1	0	0		1			1			REMIND		0
'Energy Service|Transportation|Road'	0	0	0	0	0	0	0	0	0	0	1	0	0		1			1			REMIND		0
'Eutrophication|Marine|Electricity'	0	0	0	0	0	0	1	0	1	0	1	0	0		3			3			IMAGE		IMAGE
'Expenditure|Energy|Fossil'	0	0	0	0	0	0	0	0	0	0	0	0	0		0			0			0		0
'Expenditure|Medical System|Incremental'	0	0	0	0	0	10	0	0	0	0	0	0	0		10			1			GEM-E3		0
'Expenditure|RnD'	0	0	0	0	0	0	0	0	0	0	0	0	1		1			1			WITCH		0
'Expenditure|government'	0	0	0	0	0	0	0	0	0	0	0	0	0		0			0			0		0
'Expenditure|household'	0	0	0	0	0	10	0	0	0	0	0	0	0		10			1			GEM-E3		0
'Expenditure|household|Energy'	0	0	0	0	0	10	0	0	0	0	0	0	0		10			1			GEM-E3		0
'Expenditure|household|Food'	0	0	0	0	0	10	0	0	0	0	12	0	0		22			2			REMIND		REMIND
'Expenditure|household|Industry'	0	0	0	0	0	0	0	0	0	0	0	0	0		0			0			0		0
'Expenditure|household|Services'	0	0	0	0	0	10	0	0	0	0	0	0	0		10			1			GEM-E3		0
'Expenditure|household|Services|health'	0	0	0	0	0	0	0	0	0	0	0	0	0		0			0			0		0
'Export'	0	0	0	0	0	0	0	0	0	0	0	0	0		0			0			0		0
'Export|Agriculture'	0	0	0	0	0	0	0	0	0	0	0	0	0		0			0			0		0
'Export|Energy'	0	0	0	0	0	0	0	0	0	0	0	0	1		1			1			WITCH		0
'Export|Industry'	0	0	0	0	0	0	0	0	0	0	0	0	0		0			0			0		0
'Export|Industry|Energy'	0	0	0	0	0	0	0	0	0	0	0	0	0		0			0			0		0
'Export|Industry|Energy Intensive'	0	0	0	0	0	0	0	0	0	0	0	0	0		0			0			0		0
'Export|Industry|Manufacturing'	0	0	0	0	0	0	0	0	0	0	0	0	0		0			0			0		0
'Export|Other'	0	0	0	0	0	0	0	0	0	0	0	0	0		0			0			0		0
'Fertilizer Use|Nitrogen'	3	0	0	0	0	0	8	0	36	5	28	0	0		80			5			MESSAGE		MESSAGE
'Fertilizer Use|Phosphorus'	0	0	0	0	0	0	0	0	35	0	0	0	0		35			1			MESSAGE		0
'Final Energy'	3	0	4	0	6	10	9	0	43	10	44	0	2		131			9			REMIND		REMIND
'Final Energy (excl. feedstocks)|Industry'	0	0	0	0	0	0	7	0	0	0	0	0	0		7			1			IMAGE		0
'Final Energy (excl. feedstocks)|Industry|Electricity'	0	0	0	0	0	0	7	0	0	0	0	0	0		7			1			IMAGE		0
'Final Energy (excl. feedstocks)|Industry|Gases'	0	0	0	0	0	0	7	0	0	0	0	0	0		7			1			IMAGE		0
'Final Energy (excl. feedstocks)|Industry|Gases|Bioenergy'	0	0	0	0	0	0	0	0	0	0	0	0	0		0			0			0		0
'Final Energy (excl. feedstocks)|Industry|Gases|Fossil'	0	0	0	0	0	0	7	0	0	0	0	0	0		7			1			IMAGE		0
'Final Energy (excl. feedstocks)|Industry|Gases|Hydrogen synfuel'	0	0	0	0	0	0	0	0	0	0	0	0	0		0			0			0		0
'Final Energy (excl. feedstocks)|Industry|Heat'	0	0	0	0	0	0	7	0	0	0	0	0	0		7			1			IMAGE		0
'Final Energy (excl. feedstocks)|Industry|Hydrogen'	0	0	0	0	0	0	7	0	0	0	0	0	0		7			1			IMAGE		0
'Final Energy (excl. feedstocks)|Industry|Liquids'	0	0	0	0	0	0	7	0	0	0	0	0	0		7			1			IMAGE		0
'Final Energy (excl. feedstocks)|Industry|Liquids|Bioenergy'	0	0	0	0	0	0	7	0	0	0	0	0	0		7			1			IMAGE		0
'Final Energy (excl. feedstocks)|Industry|Liquids|Fossil'	0	0	0	0	0	0	7	0	0	0	0	0	0		7			1			IMAGE		0
'Final Energy (excl. feedstocks)|Industry|Liquids|Hydrogen synfuel'	0	0	0	0	0	0	0	0	0	0	0	0	0		0			0			0		0
'Final Energy (excl. feedstocks)|Industry|Other'	0	0	0	0	0	0	0	0	0	0	0	0	0		0			0			0		0
'Final Energy (excl. feedstocks)|Industry|Solids'	0	0	0	0	0	0	7	0	0	0	0	0	0		7			1			IMAGE		0
'Final Energy (excl. feedstocks)|Industry|Solids|Bioenergy'	0	0	0	0	0	0	7	0	0	0	0	0	0		7			1			IMAGE		0
'Final Energy (excl. feedstocks)|Industry|Solids|Fossil'	0	0	0	0	0	0	7	0	0	0	0	0	0		7			1			IMAGE		0
'Final Energy|Electricity'	3	0	4	0	6	10	9	0	43	10	44	0	2		131			9			REMIND		REMIND
'Final Energy|Gases'	3	0	4	0	6	10	9	0	43	10	44	0	2		131			9			REMIND		REMIND
'Final Energy|Geothermal'	3	0	0	0	0	0	1	0	37	4	31	0	1		77			6			MESSAGE		MESSAGE
'Final Energy|Heat'	3	0	0	0	6	10	9	0	43	10	44	0	1		126			8			REMIND		REMIND
'Final Energy|Hydrogen'	3	0	4	0	6	10	9	0	43	10	44	0	2		131			9			REMIND		REMIND
'Final Energy|Industry'	3	0	4	0	6	10	8	0	42	6	36	0	2		117			9			MESSAGE		MESSAGE
'Final Energy|Industry|Cement|Electricity'	0	0	0	0	0	0	7	0	0	0	1	0	0		8			2			IMAGE		IMAGE
'Final Energy|Industry|Cement|Gases'	0	0	0	0	0	0	7	0	0	0	1	0	0		8			2			IMAGE		IMAGE
'Final Energy|Industry|Cement|Gases|Bioenergy'	0	0	0	0	0	0	0	0	0	0	0	0	0		0			0			0		0
'Final Energy|Industry|Cement|Gases|Fossil'	0	0	0	0	0	0	0	0	0	0	0	0	0		0			0			0		0
'Final Energy|Industry|Cement|Gases|Hydrogen synfuel'	0	0	0	0	0	0	0	0	0	0	0	0	0		0			0			0		0
'Final Energy|Industry|Cement|Heat'	0	0	0	0	0	0	7	0	0	0	1	0	0		8			2			IMAGE		IMAGE
'Final Energy|Industry|Cement|Hydrogen'	0	0	0	0	0	0	7	0	0	0	1	0	0		8			2			IMAGE		IMAGE
'Final Energy|Industry|Cement|Liquids'	0	0	0	0	0	0	7	0	0	0	1	0	0		8			2			IMAGE		IMAGE
'Final Energy|Industry|Cement|Liquids|Bioenergy'	0	0	0	0	0	0	0	0	0	0	0	0	0		0			0			0		0
'Final Energy|Industry|Cement|Liquids|Fossil'	0	0	0	0	0	0	7	0	0	0	0	0	0		7			1			IMAGE		0
'Final Energy|Industry|Cement|Liquids|Hydrogen synfuel'	0	0	0	0	0	0	0	0	0	0	0	0	0		0			0			0		0
'Final Energy|Industry|Cement|Other'	0	0	0	0	0	0	0	0	0	0	0	0	0		0			0			0		0
'Final Energy|Industry|Cement|Solids'	0	0	0	0	0	0	7	0	0	0	1	0	0		8			2			IMAGE		IMAGE
'Final Energy|Industry|Cement|Solids|Bioenergy'	0	0	0	0	0	0	7	0	0	0	0	0	0		7			1			IMAGE		0
'Final Energy|Industry|Cement|Solids|Fossil'	0	0	0	0	0	0	7	0	0	0	0	0	0		7			1			IMAGE		0
'Final Energy|Industry|Chemicals|Ammonia|Electricity'	0	0	0	0	0	0	7	0	0	0	0	0	0		7			1			IMAGE		0
'Final Energy|Industry|Chemicals|Ammonia|Gases'	0	0	0	0	0	0	7	0	0	0	0	0	0		7			1			IMAGE		0
'Final Energy|Industry|Chemicals|Ammonia|Gases|Bioenergy'	0	0	0	0	0	0	0	0	0	0	0	0	0		0			0			0		0
'Final Energy|Industry|Chemicals|Ammonia|Gases|Fossil'	0	0	0	0	0	0	7	0	0	0	0	0	0		7			1			IMAGE		0
'Final Energy|Industry|Chemicals|Ammonia|Heat'	0	0	0	0	0	0	0	0	0	0	0	0	0		0			0			0		0
'Final Energy|Industry|Chemicals|Ammonia|Hydrogen'	0	0	0	0	0	0	0	0	0	0	0	0	0		0			0			0		0
'Final Energy|Industry|Chemicals|Ammonia|Liquids'	0	0	0	0	0	0	7	0	0	0	0	0	0		7			1			IMAGE		0
'Final Energy|Industry|Chemicals|Ammonia|Liquids|Bioenergy'	0	0	0	0	0	0	7	0	0	0	0	0	0		7			1			IMAGE		0
'Final Energy|Industry|Chemicals|Ammonia|Liquids|Fossil'	0	0	0	0	0	0	7	0	0	0	0	0	0		7			1			IMAGE		0
'Final Energy|Industry|Chemicals|Ammonia|Other'	0	0	0	0	0	0	7	0	0	0	0	0	0		7			1			IMAGE		0
'Final Energy|Industry|Chemicals|Ammonia|Solids'	0	0	0	0	0	0	7	0	0	0	0	0	0		7			1			IMAGE		0
'Final Energy|Industry|Chemicals|Ammonia|Solids|Bioenergy'	0	0	0	0	0	0	7	0	0	0	0	0	0		7			1			IMAGE		0
'Final Energy|Industry|Chemicals|Ammonia|Solids|Fossil'	0	0	0	0	0	0	7	0	0	0	0	0	0		7			1			IMAGE		0
'Final Energy|Industry|Chemicals|Electricity'	0	0	0	0	0	0	7	0	0	0	1	0	0		8			2			IMAGE		IMAGE
'Final Energy|Industry|Chemicals|Gases'	0	0	0	0	0	0	7	0	0	0	1	0	0		8			2			IMAGE		IMAGE
'Final Energy|Industry|Chemicals|Gases|Bioenergy'	0	0	0	0	0	0	0	0	0	0	0	0	0		0			0			0		0
'Final Energy|Industry|Chemicals|Gases|Fossil'	0	0	0	0	0	0	0	0	0	0	0	0	0		0			0			0		0
'Final Energy|Industry|Chemicals|Gases|Hydrogen synfuel'	0	0	0	0	0	0	0	0	0	0	0	0	0		0			0			0		0
'Final Energy|Industry|Chemicals|Heat'	0	0	0	0	0	0	0	0	0	0	1	0	0		1			1			REMIND		0
'Final Energy|Industry|Chemicals|High value chemicals|Electricity'	0	0	0	0	0	0	7	0	0	0	0	0	0		7			1			IMAGE		0
'Final Energy|Industry|Chemicals|High value chemicals|Gases'	0	0	0	0	0	0	7	0	0	0	0	0	0		7			1			IMAGE		0
'Final Energy|Industry|Chemicals|High value chemicals|Gases|Fossil'	0	0	0	0	0	0	7	0	0	0	0	0	0		7			1			IMAGE		0
'Final Energy|Industry|Chemicals|High value chemicals|Liquids'	0	0	0	0	0	0	7	0	0	0	0	0	0		7			1			IMAGE		0
'Final Energy|Industry|Chemicals|High value chemicals|Liquids|Bioenergy'	0	0	0	0	0	0	7	0	0	0	0	0	0		7			1			IMAGE		0
'Final Energy|Industry|Chemicals|High value chemicals|Liquids|Fossil'	0	0	0	0	0	0	7	0	0	0	0	0	0		7			1			IMAGE		0
'Final Energy|Industry|Chemicals|High value chemicals|Solids'	0	0	0	0	0	0	7	0	0	0	0	0	0		7			1			IMAGE		0
'Final Energy|Industry|Chemicals|High value chemicals|Solids|Bioenergy'	0	0	0	0	0	0	7	0	0	0	0	0	0		7			1			IMAGE		0
'Final Energy|Industry|Chemicals|High value chemicals|Solids|Fossil'	0	0	0	0	0	0	7	0	0	0	0	0	0		7			1			IMAGE		0
'Final Energy|Industry|Chemicals|Hydrogen'	0	0	0	0	0	0	0	0	0	0	1	0	0		1			1			REMIND		0
'Final Energy|Industry|Chemicals|Liquids'	0	0	0	0	0	0	7	0	0	0	1	0	0		8			2			IMAGE		IMAGE
'Final Energy|Industry|Chemicals|Liquids|Bioenergy'	0	0	0	0	0	0	7	0	0	0	0	0	0		7			1			IMAGE		0
'Final Energy|Industry|Chemicals|Liquids|Fossil'	0	0	0	0	0	0	7	0	0	0	0	0	0		7			1			IMAGE		0
'Final Energy|Industry|Chemicals|Liquids|Hydrogen synfuel'	0	0	0	0	0	0	0	0	0	0	0	0	0		0			0			0		0
'Final Energy|Industry|Chemicals|Other'	0	0	0	0	0	0	0	0	0	0	0	0	0		0			0			0		0
'Final Energy|Industry|Chemicals|Solids'	0	0	0	0	0	0	7	0	0	0	1	0	0		8			2			IMAGE		IMAGE
'Final Energy|Industry|Chemicals|Solids|Bioenergy'	0	0	0	0	0	0	7	0	0	0	0	0	0		7			1			IMAGE		0
'Final Energy|Industry|Chemicals|Solids|Fossil'	0	0	0	0	0	0	7	0	0	0	0	0	0		7			1			IMAGE		0
'Final Energy|Industry|Electricity'	3	0	4	0	6	10	8	0	41	10	40	0	1		123			9			MESSAGE		MESSAGE
'Final Energy|Industry|Gases'	3	0	4	0	6	10	8	0	41	10	40	0	1		123			9			MESSAGE		MESSAGE
'Final Energy|Industry|Gases|'	0	0	0	0	0	0	0	0	0	0	0	0	0		0			0			0		0
'Final Energy|Industry|Gases|Bioenergy'	0	0	0	0	0	0	0	0	0	0	7	0	0		7			1			REMIND		0
'Final Energy|Industry|Gases|Fossil'	0	0	0	0	0	0	0	0	0	0	0	0	0		0			0			0		0
'Final Energy|Industry|Gases|Hydrogen synfuel'	0	0	0	0	0	0	0	0	0	0	0	0	0		0			0			0		0
'Final Energy|Industry|Heat'	3	0	0	0	6	0	8	0	40	9	40	0	0		106			6			MESSAGE		MESSAGE
'Final Energy|Industry|Hydrogen'	3	0	4	0	6	10	8	0	41	10	40	0	0		122			8			MESSAGE		MESSAGE
'Final Energy|Industry|Liquids'	3	0	4	0	6	10	8	0	41	10	40	0	1		123			9			MESSAGE		MESSAGE
'Final Energy|Industry|Liquids|'	0	0	0	0	0	0	0	0	0	0	0	0	0		0			0			0		0
'Final Energy|Industry|Liquids|Bioenergy'	0	0	0	0	0	0	0	0	0	0	0	0	0		0			0			0		0
'Final Energy|Industry|Liquids|Fossil'	0	0	0	0	0	0	0	0	0	0	0	0	0		0			0			0		0
'Final Energy|Industry|Liquids|Hydrogen synfuel'	0	0	0	0	0	0	0	0	0	0	0	0	0		0			0			0		0
'Final Energy|Industry|Liquids|Oil'	0	0	0	0	0	0	0	0	11	0	0	0	0		11			1			MESSAGE		0
'Final Energy|Industry|Other'	0	0	0	0	0	10	1	0	40	9	0	0	0		60			4			MESSAGE		MESSAGE
'Final Energy|Industry|Other|Electricity'	0	0	0	0	0	0	7	0	0	0	1	0	0		8			2			IMAGE		IMAGE
'Final Energy|Industry|Other|Gases'	0	0	0	0	0	0	7	0	0	0	1	0	0		8			2			IMAGE		IMAGE
'Final Energy|Industry|Other|Gases|Fossil'	0	0	0	0	0	0	7	0	0	0	0	0	0		7			1			IMAGE		0
'Final Energy|Industry|Other|Heat'	0	0	0	0	0	0	7	0	0	0	1	0	0		8			2			IMAGE		IMAGE
'Final Energy|Industry|Other|Hydrogen'	0	0	0	0	0	0	7	0	0	0	1	0	0		8			2			IMAGE		IMAGE
'Final Energy|Industry|Other|Liquids'	0	0	0	0	0	0	7	0	0	0	1	0	0		8			2			IMAGE		IMAGE
'Final Energy|Industry|Other|Liquids|Bioenergy'	0	0	0	0	0	0	7	0	0	0	0	0	0		7			1			IMAGE		0
'Final Energy|Industry|Other|Liquids|Fossil'	0	0	0	0	0	0	7	0	0	0	0	0	0		7			1			IMAGE		0
'Final Energy|Industry|Other|Solids'	0	0	0	0	0	0	7	0	0	0	1	0	0		8			2			IMAGE		IMAGE
'Final Energy|Industry|Other|Solids|Bioenergy'	0	0	0	0	0	0	7	0	0	0	0	0	0		7			1			IMAGE		0
'Final Energy|Industry|Other|Solids|Fossil'	0	0	0	0	0	0	7	0	0	0	0	0	0		7			1			IMAGE		0
'Final Energy|Industry|Solids'	3	0	4	0	6	10	8	0	41	10	40	0	1		123			9			MESSAGE		MESSAGE
'Final Energy|Industry|Solids|Biomass'	3	0	4	0	6	0	8	0	37	10	36	0	1		105			8			MESSAGE		MESSAGE
'Final Energy|Industry|Solids|Coal'	3	0	4	0	6	0	8	0	37	10	36	0	1		105			8			MESSAGE		MESSAGE
'Final Energy|Industry|Steel|Electricity'	0	0	0	0	0	0	7	0	0	0	1	0	0		8			2			IMAGE		IMAGE
'Final Energy|Industry|Steel|Gases'	0	0	0	0	0	0	7	0	0	0	1	0	0		8			2			IMAGE		IMAGE
'Final Energy|Industry|Steel|Gases|Bioenergy'	0	0	0	0	0	0	0	0	0	0	0	0	0		0			0			0		0
'Final Energy|Industry|Steel|Gases|Fossil'	0	0	0	0	0	0	0	0	0	0	0	0	0		0			0			0		0
'Final Energy|Industry|Steel|Gases|Hydrogen synfuel'	0	0	0	0	0	0	0	0	0	0	0	0	0		0			0			0		0
'Final Energy|Industry|Steel|Heat'	0	0	0	0	0	0	7	0	0	0	1	0	0		8			2			IMAGE		IMAGE
'Final Energy|Industry|Steel|Hydrogen'	0	0	0	0	0	0	7	0	0	0	1	0	0		8			2			IMAGE		IMAGE
'Final Energy|Industry|Steel|Liquids'	0	0	0	0	0	0	7	0	0	0	1	0	0		8			2			IMAGE		IMAGE
'Final Energy|Industry|Steel|Liquids|Bioenergy'	0	0	0	0	0	0	0	0	0	0	0	0	0		0			0			0		0
'Final Energy|Industry|Steel|Liquids|Fossil'	0	0	0	0	0	0	7	0	0	0	0	0	0		7			1			IMAGE		0
'Final Energy|Industry|Steel|Liquids|Hydrogen synfuel'	0	0	0	0	0	0	0	0	0	0	0	0	0		0			0			0		0
'Final Energy|Industry|Steel|Other'	0	0	0	0	0	0	0	0	0	0	0	0	0		0			0			0		0
'Final Energy|Industry|Steel|Solids'	0	0	0	0	0	0	7	0	0	0	1	0	0		8			2			IMAGE		IMAGE
'Final Energy|Industry|Steel|Solids|Bioenergy'	0	0	0	0	0	0	7	0	0	0	0	0	0		7			1			IMAGE		0
'Final Energy|Industry|Steel|Solids|Fossil'	0	0	0	0	0	0	7	0	0	0	0	0	0		7			1			IMAGE		0
'Final Energy|Liquids'	3	0	4	0	6	10	9	0	43	10	44	0	2		131			9			REMIND		REMIND
'Final Energy|Non-Energy Use'	3	0	0	0	6	10	7	0	35	0	0	0	0		61			5			MESSAGE		MESSAGE
'Final Energy|Non-Energy Use|Biomass'	3	0	0	0	6	10	7	0	35	0	0	0	0		61			5			MESSAGE		MESSAGE
'Final Energy|Non-Energy Use|Coal'	3	0	0	0	6	10	7	0	35	0	16	0	1		78			7			MESSAGE		MESSAGE
'Final Energy|Non-Energy Use|Gas'	3	0	0	0	6	10	7	0	35	0	16	0	0		77			6			MESSAGE		MESSAGE
'Final Energy|Non-Energy Use|Oil'	3	0	0	0	6	10	7	0	35	0	16	0	0		77			6			MESSAGE		MESSAGE
'Final Energy|Other'	0	0	0	0	0	10	0	0	0	5	0	0	0		15			2			GEM-E3		GEM-E3
'Final Energy|Other Sector'	3	0	4	0	0	0	7	0	0	5	18	0	0		37			5			REMIND		REMIND
'Final Energy|Other Sector|Electricity'	3	0	4	0	0	0	7	0	0	5	18	0	0		37			5			REMIND		REMIND
'Final Energy|Other Sector|Gases'	3	0	4	0	0	0	7	0	0	5	18	0	0		37			5			REMIND		REMIND
'Final Energy|Other Sector|Heat'	3	0	0	0	0	0	7	0	0	5	0	0	0		15			3			IMAGE		IMAGE
'Final Energy|Other Sector|Hydrogen'	0	0	4	0	0	0	7	0	0	5	18	0	0		34			4			REMIND		REMIND
'Final Energy|Other Sector|Liquids'	3	0	4	0	0	0	7	0	0	5	18	0	0		37			5			REMIND		REMIND
'Final Energy|Other Sector|Other'	0	0	0	0	0	0	0	0	0	5	0	0	0		5			1			POLES		0
'Final Energy|Other Sector|Solids'	3	0	4	0	0	0	7	0	0	5	0	0	0		19			4			IMAGE		IMAGE
'Final Energy|Other Sector|Solids|Biomass'	3	0	4	0	0	0	7	0	0	0	0	0	0		14			3			IMAGE		IMAGE
'Final Energy|Other Sector|Solids|Biomass|Traditional'	0	0	0	0	0	0	7	0	0	0	0	0	0		7			1			IMAGE		0
'Final Energy|Other Sector|Solids|Coal'	3	0	4	0	0	0	7	0	0	0	0	0	0		14			3			IMAGE		IMAGE
'Final Energy|Residential and Commercial'	3	0	4	0	6	10	9	0	37	10	37	0	2		118			9			MESSAGE		MESSAGE
'Final Energy|Residential and Commercial|Appliances'	0	0	0	0	0	0	7	0	0	0	2	0	0		9			2			IMAGE		IMAGE
'Final Energy|Residential and Commercial|Commercial'	3	0	4	0	0	10	7	0	0	0	0	0	1		25			5			GEM-E3		GEM-E3
'Final Energy|Residential and Commercial|Commercial|Appliances'	0	0	0	0	0	0	7	0	0	0	0	0	0		7			1			IMAGE		0
'Final Energy|Residential and Commercial|Commercial|Cooling'	0	0	0	0	2	0	7	0	0	0	0	0	0		9			2			IMAGE		IMAGE
'Final Energy|Residential and Commercial|Commercial|Electricity'	3	0	4	0	2	0	7	0	0	0	0	0	1		17			5			IMAGE		IMAGE
'Final Energy|Residential and Commercial|Commercial|Gases'	3	0	4	0	2	0	7	0	0	0	0	0	1		17			5			IMAGE		IMAGE
'Final Energy|Residential and Commercial|Commercial|Heat'	3	0	0	0	2	0	7	0	0	0	0	0	0		12			3			IMAGE		IMAGE
'Final Energy|Residential and Commercial|Commercial|Heating'	0	0	0	0	0	0	7	0	0	0	0	0	0		7			1			IMAGE		0
'Final Energy|Residential and Commercial|Commercial|Heating|Cooking'	0	0	0	0	0	0	7	0	0	0	0	0	0		7			1			IMAGE		0
'Final Energy|Residential and Commercial|Commercial|Heating|Space'	0	0	0	0	2	0	7	0	0	0	0	0	0		9			2			IMAGE		IMAGE
'Final Energy|Residential and Commercial|Commercial|Heating|Water'	0	0	0	0	0	0	7	0	0	0	0	0	0		7			1			IMAGE		0
'Final Energy|Residential and Commercial|Commercial|Hydrogen'	0	0	4	0	0	0	7	0	0	0	0	0	0		11			2			IMAGE		IMAGE
'Final Energy|Residential and Commercial|Commercial|Lighting'	0	0	0	0	0	0	7	0	0	0	0	0	0		7			1			IMAGE		0
'Final Energy|Residential and Commercial|Commercial|Liquids'	3	0	4	0	2	0	7	0	0	0	0	0	1		17			5			IMAGE		IMAGE
'Final Energy|Residential and Commercial|Commercial|Other'	0	0	0	0	0	0	0	0	0	0	0	0	0		0			0			0		0
'Final Energy|Residential and Commercial|Commercial|Solids'	3	0	4	0	2	0	7	0	0	0	0	0	1		17			5			IMAGE		IMAGE
'Final Energy|Residential and Commercial|Commercial|Solids|Biomass'	3	0	0	0	2	0	7	0	0	0	0	0	0		12			3			IMAGE		IMAGE
'Final Energy|Residential and Commercial|Commercial|Solids|Biomass|Traditional'	3	0	0	0	0	0	7	0	0	0	0	0	0		10			2			IMAGE		IMAGE
'Final Energy|Residential and Commercial|Commercial|Solids|Coal'	3	0	0	0	2	0	7	0	0	0	0	0	0		12			3			IMAGE		IMAGE
'Final Energy|Residential and Commercial|Commercial|Water|Desalination'	0	0	0	0	0	0	0	0	0	0	0	0	0		0			0			0		0
'Final Energy|Residential and Commercial|Cooling'	0	0	0	0	2	0	7	0	0	0	2	0	0		11			3			IMAGE		IMAGE
'Final Energy|Residential and Commercial|Electricity'	3	0	4	0	6	10	7	0	35	6	33	0	1		105			9			MESSAGE		MESSAGE
'Final Energy|Residential and Commercial|Gases'	3	0	4	0	6	10	7	0	35	6	33	0	1		105			9			MESSAGE		MESSAGE
'Final Energy|Residential and Commercial|Heat'	3	0	4	0	6	10	8	0	35	9	37	0	0		112			8			REMIND		REMIND
'Final Energy|Residential and Commercial|Heating'	0	0	0	0	0	0	7	0	0	0	0	0	0		7			1			IMAGE		0
'Final Energy|Residential and Commercial|Heating|Cooking'	0	0	0	0	0	0	7	0	0	0	0	0	0		7			1			IMAGE		0
'Final Energy|Residential and Commercial|Heating|Space'	0	0	0	0	2	0	7	0	0	0	2	0	0		11			3			IMAGE		IMAGE
'Final Energy|Residential and Commercial|Heating|Water'	0	0	0	0	0	0	7	0	0	0	2	0	0		9			2			IMAGE		IMAGE
'Final Energy|Residential and Commercial|Hydrogen'	3	0	4	0	0	10	7	0	35	6	33	0	0		98			7			MESSAGE		MESSAGE
'Final Energy|Residential and Commercial|Lighting'	0	0	0	0	0	0	7	0	0	0	0	0	0		7			1			IMAGE		0
'Final Energy|Residential and Commercial|Liquids'	3	0	4	0	6	10	7	0	35	6	33	0	1		105			9			MESSAGE		MESSAGE
'Final Energy|Residential and Commercial|Other'	0	0	4	0	0	10	0	0	35	5	0	0	0		54			4			MESSAGE		MESSAGE
'Final Energy|Residential and Commercial|Residential'	3	0	4	0	0	10	7	0	0	0	0	0	1		25			5			GEM-E3		GEM-E3
'Final Energy|Residential and Commercial|Residential|Appliances'	0	0	0	0	0	0	7	0	0	0	0	0	0		7			1			IMAGE		0
'Final Energy|Residential and Commercial|Residential|Cooling'	0	0	0	0	2	0	7	0	0	0	0	0	0		9			2			IMAGE		IMAGE
'Final Energy|Residential and Commercial|Residential|Electricity'	3	0	4	0	2	0	7	0	0	0	0	0	1		17			5			IMAGE		IMAGE
'Final Energy|Residential and Commercial|Residential|Gases'	3	0	4	0	2	0	7	0	0	0	0	0	1		17			5			IMAGE		IMAGE
'Final Energy|Residential and Commercial|Residential|Heat'	3	0	0	0	2	0	7	0	0	0	0	0	0		12			3			IMAGE		IMAGE
'Final Energy|Residential and Commercial|Residential|Heating'	0	0	0	0	0	0	7	0	0	0	0	0	0		7			1			IMAGE		0
'Final Energy|Residential and Commercial|Residential|Heating|Cooking'	0	0	0	0	0	0	7	0	0	0	0	0	0		7			1			IMAGE		0
'Final Energy|Residential and Commercial|Residential|Heating|Space'	0	0	0	0	2	0	7	0	0	0	0	0	0		9			2			IMAGE		IMAGE
'Final Energy|Residential and Commercial|Residential|Heating|Water'	0	0	0	0	0	0	7	0	0	0	0	0	0		7			1			IMAGE		0
'Final Energy|Residential and Commercial|Residential|Hydrogen'	0	0	4	0	0	0	7	0	0	0	0	0	0		11			2			IMAGE		IMAGE
'Final Energy|Residential and Commercial|Residential|Lighting'	0	0	0	0	0	0	7	0	0	0	0	0	0		7			1			IMAGE		0
'Final Energy|Residential and Commercial|Residential|Liquids'	3	0	4	0	2	0	7	0	0	0	0	0	1		17			5			IMAGE		IMAGE
'Final Energy|Residential and Commercial|Residential|Other'	0	0	0	0	0	0	0	0	0	0	0	0	0		0			0			0		0
'Final Energy|Residential and Commercial|Residential|Solids'	3	0	4	0	0	0	7	0	0	0	0	0	1		15			4			IMAGE		IMAGE
'Final Energy|Residential and Commercial|Residential|Solids|Biomass'	3	0	0	0	0	0	7	0	0	0	0	0	0		10			2			IMAGE		IMAGE
'Final Energy|Residential and Commercial|Residential|Solids|Biomass|Traditional'	3	0	0	0	0	0	7	0	0	0	0	0	0		10			2			IMAGE		IMAGE
'Final Energy|Residential and Commercial|Residential|Solids|Coal'	3	0	0	0	0	0	7	0	0	0	0	0	0		10			2			IMAGE		IMAGE
'Final Energy|Residential and Commercial|Solids'	3	0	4	0	6	10	7	0	35	5	33	0	1		104			9			MESSAGE		MESSAGE
'Final Energy|Residential and Commercial|Solids|Biomass'	3	0	0	0	6	10	7	0	35	6	33	0	1		101			8			MESSAGE		MESSAGE
'Final Energy|Residential and Commercial|Solids|Biomass|Traditional'	0	0	0	0	2	0	7	0	35	0	18	0	0		62			4			MESSAGE		MESSAGE
'Final Energy|Residential and Commercial|Solids|Coal'	3	0	0	0	6	10	7	0	35	6	33	0	1		101			8			MESSAGE		MESSAGE
'Final Energy|Solar'	3	0	4	0	0	0	8	0	43	10	16	0	1		85			7			MESSAGE		MESSAGE
'Final Energy|Solids'	3	0	4	0	6	10	9	0	43	10	44	0	2		131			9			REMIND		REMIND
'Final Energy|Solids|Biomass'	3	0	4	0	6	10	9	0	43	10	44	0	2		131			9			REMIND		REMIND
'Final Energy|Solids|Biomass|Traditional'	3	0	0	0	6	0	8	0	41	10	44	0	0		112			6			REMIND		REMIND
'Final Energy|Solids|Coal'	3	0	4	0	6	10	9	0	43	10	44	0	2		131			9			REMIND		REMIND
'Final Energy|Transportation'	3	0	4	0	6	10	9	0	43	10	44	0	2		131			9			REMIND		REMIND
'Final Energy|Transportation|Aviation'	0	0	0	0	0	0	0	0	0	0	0	0	0		0			0			0		0
'Final Energy|Transportation|Aviation|Freight'	0	0	0	0	0	0	7	0	0	0	0	0	0		7			1			IMAGE		0
'Final Energy|Transportation|Aviation|Passenger'	0	0	0	0	0	0	7	0	0	0	1	0	0		8			2			IMAGE		IMAGE
'Final Energy|Transportation|Electricity'	3	0	4	0	6	10	9	0	43	10	44	0	2		131			9			REMIND		REMIND
'Final Energy|Transportation|Freight'	3	0	4	0	6	10	7	0	0	6	15	0	1		52			8			REMIND		REMIND
'Final Energy|Transportation|Freight|Electricity'	3	0	4	0	2	0	7	0	0	0	1	0	1		18			6			IMAGE		IMAGE
'Final Energy|Transportation|Freight|Gases'	0	0	4	0	2	0	7	0	0	0	1	0	0		14			4			IMAGE		IMAGE
'Final Energy|Transportation|Freight|Gases|Bioenergy'	0	0	0	0	0	0	0	0	0	0	0	0	0		0			0			0		0
'Final Energy|Transportation|Freight|Gases|Fossil'	0	0	0	0	0	0	0	0	0	0	0	0	0		0			0			0		0
'Final Energy|Transportation|Freight|Hydrogen'	0	0	4	0	0	0	7	0	0	0	1	0	1		13			4			IMAGE		IMAGE
'Final Energy|Transportation|Freight|Liquids'	3	0	4	0	2	10	7	0	0	0	13	0	1		40			7			REMIND		REMIND
'Final Energy|Transportation|Freight|Liquids|Bioenergy'	3	0	4	0	0	10	7	0	0	0	18	0	1		43			6			REMIND		REMIND
'Final Energy|Transportation|Freight|Liquids|Fossil synfuel'	0	0	0	0	0	0	0	0	0	0	0	0	0		0			0			0		0
'Final Energy|Transportation|Freight|Liquids|Oil'	3	0	4	0	0	10	7	0	0	0	9	0	1		34			6			GEM-E3		GEM-E3
'Final Energy|Transportation|Freight|Other'	3	0	0	0	2	0	0	0	0	0	18	0	0		23			3			REMIND		REMIND
'Final Energy|Transportation|Gases'	3	0	4	0	6	10	7	0	40	6	34	0	1		111			9			MESSAGE		MESSAGE
'Final Energy|Transportation|Gases|Bioenergy'	0	0	0	0	0	0	0	0	0	0	1	0	0		1			1			REMIND		0
'Final Energy|Transportation|Gases|Fossil'	0	0	0	0	0	0	7	0	0	0	1	0	0		8			2			IMAGE		IMAGE
'Final Energy|Transportation|Hydrogen'	3	0	4	0	6	10	8	0	41	10	44	0	1		127			9			REMIND		REMIND
'Final Energy|Transportation|Liquids'	3	0	4	0	6	10	7	0	40	6	40	0	1		117			9			MESSAGE		MESSAGE
'Final Energy|Transportation|Liquids|Bioenergy'	3	0	4	0	0	0	0	0	35	5	21	0	1		69			6			MESSAGE		MESSAGE
'Final Energy|Transportation|Liquids|Coal'	0	0	0	0	0	10	7	0	35	5	18	0	0		75			5			MESSAGE		MESSAGE
'Final Energy|Transportation|Liquids|Fossil synfuel'	0	0	0	0	0	0	0	0	0	0	0	0	0		0			0			0		0
'Final Energy|Transportation|Liquids|Natural Gas'	0	0	0	0	0	0	7	0	0	5	0	0	0		12			2			IMAGE		IMAGE
'Final Energy|Transportation|Liquids|Oil'	3	0	4	0	0	10	8	0	41	10	40	0	1		117			8			MESSAGE		MESSAGE
'Final Energy|Transportation|Maritime'	0	0	0	0	0	0	0	0	0	0	1	0	0		1			1			REMIND		0
'Final Energy|Transportation|Other'	3	0	0	0	2	10	7	0	35	5	18	0	0		80			7			MESSAGE		MESSAGE
'Final Energy|Transportation|Passenger'	3	0	4	0	2	10	7	0	0	5	13	0	1		45			8			REMIND		REMIND
'Final Energy|Transportation|Passenger|Electricity'	3	0	4	0	2	10	7	0	0	0	18	0	1		45			7			REMIND		REMIND
'Final Energy|Transportation|Passenger|Gases'	0	0	4	0	2	0	7	0	0	0	1	0	0		14			4			IMAGE		IMAGE
'Final Energy|Transportation|Passenger|Gases|Bioenergy'	0	0	0	0	0	0	0	0	0	0	0	0	0		0			0			0		0
'Final Energy|Transportation|Passenger|Gases|Fossil'	0	0	0	0	0	0	7	0	0	0	0	0	0		7			1			IMAGE		0
'Final Energy|Transportation|Passenger|Hydrogen'	0	0	4	0	2	0	7	0	0	0	18	0	1		32			5			REMIND		REMIND
'Final Energy|Transportation|Passenger|Liquids'	3	0	4	0	2	10	7	0	0	0	13	0	1		40			7			REMIND		REMIND
'Final Energy|Transportation|Passenger|Liquids|Bioenergy'	3	0	4	0	0	10	0	0	0	0	18	0	1		36			5			REMIND		REMIND
'Final Energy|Transportation|Passenger|Liquids|Fossil synfuel'	0	0	0	0	0	0	0	0	0	0	0	0	0		0			0			0		0
'Final Energy|Transportation|Passenger|Liquids|Oil'	3	0	4	0	0	10	7	0	0	0	9	0	1		34			6			GEM-E3		GEM-E3
'Final Energy|Transportation|Passenger|Other'	3	0	0	0	0	0	0	0	0	0	18	0	0		21			2			REMIND		REMIND
'Final Energy|Transportation|Rail'	0	0	0	0	0	0	7	0	0	0	1	0	0		8			2			IMAGE		IMAGE
'Final Energy|Transportation|Rail|Freight'	0	0	0	0	0	0	7	0	0	0	1	0	0		8			2			IMAGE		IMAGE
'Final Energy|Transportation|Rail|Passenger'	0	0	0	0	0	0	7	0	0	0	1	0	0		8			2			IMAGE		IMAGE
'Final Energy|Transportation|Road|Freight'	0	0	0	0	2	0	7	0	0	0	1	0	0		10			3			IMAGE		IMAGE
'Final Energy|Transportation|Road|Freight|Electric'	0	0	0	0	2	0	0	0	0	0	1	0	0		3			2			GCAM		GCAM
'Final Energy|Transportation|Road|Freight|FC'	0	0	0	0	0	0	0	0	0	0	1	0	0		1			1			REMIND		0
'Final Energy|Transportation|Road|Freight|ICE'	0	0	0	0	0	0	0	0	0	0	1	0	0		1			1			REMIND		0
'Final Energy|Transportation|Road|Passenger'	0	0	0	0	2	0	7	0	0	0	1	0	0		10			3			IMAGE		IMAGE
'Final Energy|Transportation|Road|Passenger|2W&3W'	0	0	0	0	2	0	0	0	0	0	1	0	0		3			2			GCAM		GCAM
'Final Energy|Transportation|Road|Passenger|Bus'	0	0	0	0	0	0	7	0	0	0	1	0	0		8			2			IMAGE		IMAGE
'Final Energy|Transportation|Road|Passenger|LDV'	0	0	0	0	0	0	7	0	0	0	7	0	0		14			2			IMAGE		IMAGE
'Food Demand'	3	0	0	0	0	0	8	0	41	5	32	0	2		91			6			MESSAGE		MESSAGE
'Food Demand|Crops'	3	0	0	0	0	0	7	0	39	5	32	0	1		87			6			MESSAGE		MESSAGE
'Food Demand|Livestock'	3	0	0	0	0	0	7	0	39	5	32	0	1		87			6			MESSAGE		MESSAGE
'Food Energy Supply'	3	0	0	0	0	0	7	0	0	0	16	0	1		27			4			REMIND		REMIND
'Food Energy Supply|Livestock'	3	0	0	0	0	0	0	0	0	0	16	0	1		20			3			REMIND		REMIND
'Forcing'	3	2	0	0	6	0	8	0	2	0	36	0	0		57			6			REMIND		REMIND
'Forcing|Aerosol'	3	0	0	0	0	0	8	0	2	0	33	0	0		46			4			REMIND		REMIND
'Forcing|Aerosol|BC'	3	0	0	0	0	0	7	0	0	0	33	0	0		43			3			REMIND		REMIND
'Forcing|Aerosol|Black and Organic Carbon'	3	0	0	0	0	0	7	0	1	0	0	0	0		11			3			IMAGE		IMAGE
'Forcing|Aerosol|Cloud Indirect'	3	0	0	0	0	0	7	0	1	0	33	0	0		44			4			REMIND		REMIND
'Forcing|Aerosol|OC'	3	0	0	0	0	0	7	0	0	0	33	0	0		43			3			REMIND		REMIND
'Forcing|Aerosol|Other'	3	0	0	0	0	0	7	0	0	0	33	0	0		43			3			REMIND		REMIND
'Forcing|Aerosol|Sulfate Direct'	3	0	0	0	0	0	7	0	1	0	33	0	0		44			4			REMIND		REMIND
'Forcing|Albedo Change and Mineral Dust'	0	0	0	0	0	0	8	0	0	0	33	0	0		41			2			REMIND		REMIND
'Forcing|CH4'	3	2	0	0	0	0	8	0	2	0	33	0	0		48			5			REMIND		REMIND
'Forcing|CO2'	3	2	0	0	0	0	8	0	2	0	33	0	0		48			5			REMIND		REMIND
'Forcing|F-Gases'	3	2	0	0	0	0	8	0	1	0	33	0	0		47			5			REMIND		REMIND
'Forcing|Kyoto Gases'	3	0	0	0	0	0	8	0	2	0	36	0	0		49			4			REMIND		REMIND
'Forcing|Montreal Gases'	0	2	0	0	0	0	8	0	1	0	33	0	0		44			4			REMIND		REMIND
'Forcing|N2O'	3	2	0	0	0	0	8	0	2	0	33	0	0		48			5			REMIND		REMIND
'Forcing|Other'	3	2	0	0	0	0	7	0	1	0	33	0	0		46			5			REMIND		REMIND
'Forcing|Tropospheric Ozone'	3	0	0	0	0	0	8	0	2	0	33	0	0		46			4			REMIND		REMIND
'Forestry Demand|Roundwood'	3	0	0	0	0	0	7	0	35	0	0	0	0		45			3			MESSAGE		MESSAGE
'Forestry Demand|Roundwood|Industrial Roundwood'	3	0	0	0	0	0	7	0	35	0	0	0	0		45			3			MESSAGE		MESSAGE
'Forestry Demand|Roundwood|Wood Fuel'	3	0	0	0	0	0	7	0	35	0	0	0	0		45			3			MESSAGE		MESSAGE
'Forestry Production|Roundwood'	3	0	0	0	0	0	7	0	35	5	0	0	0		50			4			MESSAGE		MESSAGE
'Forestry Production|Roundwood|Industrial Roundwood'	3	0	0	0	0	0	7	0	35	0	0	0	0		45			3			MESSAGE		MESSAGE
'Forestry Production|Roundwood|Wood Fuel'	3	0	0	0	0	0	7	0	35	0	0	0	0		45			3			MESSAGE		MESSAGE
'GDP|MER'	3	2	0	0	6	10	9	0	42	10	42	0	2		126			9			MESSAGE		MESSAGE
'GDP|PPP'	3	2	4	0	6	0	9	0	41	9	42	0	2		118			9			REMIND		REMIND
'Human Toxicity|Electricity'	0	0	0	0	0	0	1	0	1	0	1	0	0		3			3			IMAGE		IMAGE
'Import'	0	0	0	0	0	0	0	0	0	0	0	0	0		0			0			0		0
'Import|Agriculture'	0	0	0	0	0	0	0	0	0	0	0	0	0		0			0			0		0
'Import|Energy'	0	0	0	0	0	0	0	0	0	0	0	0	1		1			1			WITCH		0
'Import|Industry'	0	0	0	0	0	0	0	0	0	0	0	0	0		0			0			0		0
'Import|Industry|Energy'	0	0	0	0	0	0	0	0	0	0	0	0	0		0			0			0		0
'Import|Industry|Energy Intensive'	0	0	0	0	0	0	0	0	0	0	0	0	0		0			0			0		0
'Import|Industry|Manufacturing'	0	0	0	0	0	0	0	0	0	0	0	0	0		0			0			0		0
'Import|Other'	0	0	0	0	0	0	0	0	0	0	0	0	0		0			0			0		0
'Interest Rate|Real'	0	0	0	0	0	0	0	0	0	0	18	0	0		18			1			REMIND		0
'Investment'	0	0	4	0	0	10	7	0	0	0	18	0	1		40			5			REMIND		REMIND
'Investment|Energy Demand|Transportation|Freight|Road|HDT|EV'	0	0	0	0	0	0	0	0	0	0	0	0	1		1			1			WITCH		0
'Investment|Energy Demand|Transportation|Freight|Road|HDT|ICE'	0	0	0	0	0	0	0	0	0	0	0	0	1		1			1			WITCH		0
'Investment|Energy Demand|Transportation|Passenger|Road|LDV|EV'	0	0	0	0	0	0	0	0	0	1	0	0	1		2			2			POLES		POLES
'Investment|Energy Demand|Transportation|Passenger|Road|LDV|FCV'	0	0	0	0	0	0	0	0	0	0	0	0	1		1			1			WITCH		0
'Investment|Energy Demand|Transportation|Passenger|Road|LDV|ICE'	0	0	0	0	0	0	0	0	0	0	0	0	1		1			1			WITCH		0
'Investment|Energy Efficiency'	0	0	0	0	0	0	1	0	1	0	0	0	1		3			3			IMAGE		IMAGE
'Investment|Energy Supply'	3	0	4	0	2	10	8	0	36	9	38	0	1		111			9			REMIND		REMIND
'Investment|Energy Supply|CO2 Transport and Storage'	3	0	4	0	2	0	7	0	35	0	32	0	1		84			7			MESSAGE		MESSAGE
'Investment|Energy Supply|Electricity'	3	0	4	0	2	10	7	0	35	9	34	0	1		105			9			MESSAGE		MESSAGE
'Investment|Energy Supply|Electricity|Biomass'	3	0	0	0	2	10	7	0	35	5	31	0	1		94			8			MESSAGE		MESSAGE
'Investment|Energy Supply|Electricity|Biomass|w/ CCS'	3	0	0	0	2	10	8	0	36	5	31	0	1		96			8			MESSAGE		MESSAGE
'Investment|Energy Supply|Electricity|Biomass|w/o CCS'	3	0	0	0	2	10	8	0	36	5	31	0	1		96			8			MESSAGE		MESSAGE
'Investment|Energy Supply|Electricity|Coal'	3	0	0	0	2	10	7	0	35	5	31	0	1		94			8			MESSAGE		MESSAGE
'Investment|Energy Supply|Electricity|Coal|w/ CCS'	3	0	0	0	2	10	8	0	36	5	31	0	1		96			8			MESSAGE		MESSAGE
'Investment|Energy Supply|Electricity|Coal|w/o CCS'	3	0	0	0	2	10	8	0	36	5	31	0	1		96			8			MESSAGE		MESSAGE
'Investment|Energy Supply|Electricity|Electricity Storage'	3	0	0	0	2	0	0	0	35	4	31	0	1		76			6			MESSAGE		MESSAGE
'Investment|Energy Supply|Electricity|Fossil'	3	0	0	0	2	10	7	0	35	9	33	0	1		100			8			MESSAGE		MESSAGE
'Investment|Energy Supply|Electricity|Gas'	3	0	0	0	2	10	7	0	35	5	31	0	1		94			8			MESSAGE		MESSAGE
'Investment|Energy Supply|Electricity|Gas|w/ CCS'	3	0	0	0	2	10	8	0	36	5	31	0	1		96			8			MESSAGE		MESSAGE
'Investment|Energy Supply|Electricity|Gas|w/o CCS'	3	0	0	0	2	10	8	0	36	5	31	0	1		96			8			MESSAGE		MESSAGE
'Investment|Energy Supply|Electricity|Geothermal'	3	0	0	0	2	10	1	0	36	5	13	0	0		70			7			MESSAGE		MESSAGE
'Investment|Energy Supply|Electricity|Hydro'	3	0	0	0	2	10	8	0	36	5	31	0	1		96			8			MESSAGE		MESSAGE
'Investment|Energy Supply|Electricity|Non-Biomass Renewables'	3	0	0	0	2	10	8	0	36	5	31	0	1		96			8			MESSAGE		MESSAGE
'Investment|Energy Supply|Electricity|Non-fossil'	3	0	0	0	0	10	7	0	35	9	13	0	1		78			7			MESSAGE		MESSAGE
'Investment|Energy Supply|Electricity|Nuclear'	3	0	0	0	2	10	8	0	36	5	31	0	1		96			8			MESSAGE		MESSAGE
'Investment|Energy Supply|Electricity|Ocean'	0	0	0	0	0	0	0	0	0	5	0	0	0		5			1			POLES		0
'Investment|Energy Supply|Electricity|Oil'	3	0	0	0	2	10	7	0	35	5	18	0	1		81			8			MESSAGE		MESSAGE
'Investment|Energy Supply|Electricity|Oil|w/ CCS'	3	0	0	0	0	0	7	0	0	0	0	0	0		10			2			IMAGE		IMAGE
'Investment|Energy Supply|Electricity|Oil|w/o CCS'	3	0	0	0	2	10	8	0	36	5	31	0	1		96			8			MESSAGE		MESSAGE
'Investment|Energy Supply|Electricity|Other'	3	0	0	0	0	0	7	0	35	5	0	0	0		50			4			MESSAGE		MESSAGE
'Investment|Energy Supply|Electricity|Renewables (incl. Biomass)'	3	0	0	0	2	10	8	0	36	5	31	0	1		96			8			MESSAGE		MESSAGE
'Investment|Energy Supply|Electricity|Solar'	3	0	0	0	2	10	8	0	36	5	31	0	1		96			8			MESSAGE		MESSAGE
'Investment|Energy Supply|Electricity|Transmission and Distribution'	3	0	0	0	2	0	8	0	36	0	31	0	1		81			6			MESSAGE		MESSAGE
'Investment|Energy Supply|Electricity|Wind'	3	0	0	0	2	10	8	0	36	5	31	0	1		96			8			MESSAGE		MESSAGE
'Investment|Energy Supply|Extraction|Bioenergy'	3	0	0	0	0	0	7	0	0	5	0	0	0		15			3			IMAGE		IMAGE
'Investment|Energy Supply|Extraction|Coal'	3	0	4	0	2	0	7	0	35	5	0	0	0		56			6			MESSAGE		MESSAGE
'Investment|Energy Supply|Extraction|Fossil'	3	0	0	0	2	0	8	0	36	9	0	0	1		59			6			MESSAGE		MESSAGE
'Investment|Energy Supply|Extraction|Gas'	3	0	4	0	2	0	7	0	35	5	0	0	0		56			6			MESSAGE		MESSAGE
'Investment|Energy Supply|Extraction|Oil'	3	0	4	0	2	0	7	0	35	5	0	0	1		57			7			MESSAGE		MESSAGE
'Investment|Energy Supply|Extraction|Uranium'	0	0	4	0	0	0	7	0	35	0	0	0	0		46			3			MESSAGE		MESSAGE
'Investment|Energy Supply|Heat'	3	0	0	0	0	0	7	0	35	0	32	0	0		77			4			MESSAGE		MESSAGE
'Investment|Energy Supply|Hydrogen'	0	0	4	0	2	0	0	0	35	5	32	0	1		79			6			MESSAGE		MESSAGE
'Investment|Energy Supply|Hydrogen|Biomass'	0	0	0	0	0	0	0	0	0	0	0	0	0		0			0			0		0
'Investment|Energy Supply|Hydrogen|Electricity'	0	0	0	0	0	0	0	0	0	0	0	0	0		0			0			0		0
'Investment|Energy Supply|Hydrogen|Fossil'	0	0	0	0	0	0	1	0	36	5	31	0	1		74			5			MESSAGE		MESSAGE
'Investment|Energy Supply|Hydrogen|Other'	0	0	0	0	0	0	1	0	36	0	0	0	0		37			2			MESSAGE		MESSAGE
'Investment|Energy Supply|Hydrogen|Renewable'	0	0	0	0	0	0	0	0	35	5	13	0	1		54			4			MESSAGE		MESSAGE
'Investment|Energy Supply|Liquids'	3	0	4	0	0	0	7	0	35	5	32	0	0		86			6			MESSAGE		MESSAGE
'Investment|Energy Supply|Liquids|Biomass'	3	0	0	0	0	0	7	0	35	5	32	0	0		82			5			MESSAGE		MESSAGE
'Investment|Energy Supply|Liquids|Coal and Gas'	0	0	0	0	0	0	0	0	35	5	32	0	0		72			3			MESSAGE		MESSAGE
'Investment|Energy Supply|Liquids|Oil'	3	0	0	0	0	0	7	0	35	0	32	0	0		77			4			MESSAGE		MESSAGE
'Investment|Energy Supply|Other'	0	0	0	0	2	0	0	0	35	0	1	0	0		38			3			MESSAGE		MESSAGE
'Investment|Infrastructure|Residential and Commercial|Building Retrofits'	0	0	0	0	0	0	0	0	0	1	0	0	0		1			1			POLES		0
'Investment|Infrastructure|Residential and Commercial|High-Efficiency Buildings'	0	0	0	0	0	0	0	0	0	0	0	0	0		0			0			0		0
'Investment|Infrastructure|Transportation'	0	0	0	0	0	0	0	0	0	0	0	0	1		1			1			WITCH		0
'Investment|RnD|Energy Supply'	0	0	0	0	0	0	0	0	0	0	0	0	1		1			1			WITCH		0
'Land Cover'	3	0	4	0	2	0	9	0	42	9	30	0	2		101			8			MESSAGE		MESSAGE
'Land Cover|Built-up Area'	3	0	0	0	6	0	8	0	0	5	32	0	0		54			5			REMIND		REMIND
'Land Cover|Cropland'	3	0	4	0	6	0	9	0	42	9	32	0	2		107			8			MESSAGE		MESSAGE
'Land Cover|Cropland|Cereals'	0	0	0	0	0	0	7	0	0	5	28	0	1		41			4			REMIND		REMIND
'Land Cover|Cropland|Energy Crops'	3	0	0	0	6	0	8	0	40	5	32	0	1		95			7			MESSAGE		MESSAGE
'Land Cover|Cropland|Energy Crops|2nd generation'	0	0	0	0	0	0	0	0	0	0	1	0	0		1			1			REMIND		0
'Land Cover|Cropland|Energy Crops|Irrigated'	0	0	0	0	0	0	7	0	0	0	12	0	0		19			2			REMIND		REMIND
'Land Cover|Cropland|Irrigated'	3	0	0	0	0	0	7	0	35	5	28	0	1		79			6			MESSAGE		MESSAGE
'Land Cover|Cropland|Rainfed'	3	0	0	0	0	0	7	0	0	5	12	0	0		27			4			REMIND		REMIND
'Land Cover|Forest'	3	0	4	0	6	0	9	0	42	9	32	0	2		107			8			MESSAGE		MESSAGE
'Land Cover|Forest|Afforestation and Reforestation'	0	0	0	0	0	0	7	0	35	0	28	0	1		71			4			MESSAGE		MESSAGE
'Land Cover|Forest|Forestry|Harvested Area'	3	0	0	0	0	0	7	0	0	1	0	0	0		11			3			IMAGE		IMAGE
'Land Cover|Forest|Managed'	0	0	0	0	6	0	8	0	0	5	28	0	1		48			5			REMIND		REMIND
'Land Cover|Forest|Natural Forest'	3	0	0	0	6	0	7	0	35	5	28	0	1		85			7			MESSAGE		MESSAGE
'Land Cover|Forest|Secondary'	0	0	0	0	0	0	0	0	0	0	1	0	0		1			1			REMIND		0
'Land Cover|Other Arable Land'	3	0	0	0	2	0	8	0	0	5	16	0	0		34			5			REMIND		REMIND
'Land Cover|Other Land'	3	0	4	0	6	0	7	0	35	5	28	0	1		89			8			MESSAGE		MESSAGE
'Land Cover|Pasture'	3	0	4	0	6	0	9	0	41	9	32	0	2		106			8			MESSAGE		MESSAGE
'Lifetime|Electricity|Biomass|w/ CCS'	0	0	0	0	0	0	0	0	0	5	34	0	1		40			3			REMIND		REMIND
'Lifetime|Electricity|Biomass|w/o CCS'	0	0	0	0	0	0	0	0	0	5	34	0	1		40			3			REMIND		REMIND
'Lifetime|Electricity|Coal|w/ CCS'	0	0	0	0	0	0	0	0	0	5	34	0	1		40			3			REMIND		REMIND
'Lifetime|Electricity|Coal|w/o CCS'	0	0	0	0	0	0	0	0	0	5	34	0	1		40			3			REMIND		REMIND
'Lifetime|Electricity|Gas|w/ CCS'	0	0	0	0	0	0	0	0	0	5	34	0	1		40			3			REMIND		REMIND
'Lifetime|Electricity|Gas|w/o CCS'	0	0	0	0	0	0	0	0	0	5	34	0	1		40			3			REMIND		REMIND
'Lifetime|Electricity|Geothermal'	0	0	0	0	0	0	0	0	35	5	34	0	0		74			3			MESSAGE		MESSAGE
'Lifetime|Electricity|Hydro'	0	0	0	0	0	0	0	0	35	5	34	0	1		75			4			MESSAGE		MESSAGE
'Lifetime|Electricity|Nuclear'	0	0	0	0	0	0	0	0	35	5	34	0	1		75			4			MESSAGE		MESSAGE
'Lifetime|Electricity|Solar|CSP'	0	0	0	0	0	0	0	0	0	5	34	0	1		40			3			REMIND		REMIND
'Lifetime|Electricity|Solar|PV'	0	0	0	0	0	0	0	0	35	5	34	0	1		75			4			MESSAGE		MESSAGE
'Lifetime|Electricity|Wind'	0	0	0	0	0	0	0	0	0	5	18	0	1		24			3			REMIND		REMIND
'Lifetime|Electricity|Wind|Offshore'	0	0	0	0	0	0	0	0	35	5	16	0	1		57			4			MESSAGE		MESSAGE
'Lifetime|Electricity|Wind|Onshore'	0	0	0	0	0	0	0	0	35	5	16	0	1		57			4			MESSAGE		MESSAGE
'Lifetime|Gases|Biomass|w/o CCS'	0	0	0	0	0	0	0	0	35	0	34	0	0		69			2			MESSAGE		MESSAGE
'Lifetime|Gases|Coal|w/o CCS'	0	0	0	0	0	0	0	0	35	0	34	0	0		69			2			MESSAGE		MESSAGE
'Lifetime|Hydrogen|Biomass|w/ CCS'	0	0	0	0	0	0	0	0	35	0	34	0	0		69			2			MESSAGE		MESSAGE
'Lifetime|Hydrogen|Biomass|w/o CCS'	0	0	0	0	0	0	0	0	35	0	34	0	0		69			2			MESSAGE		MESSAGE
'Lifetime|Hydrogen|Coal|w/ CCS'	0	0	0	0	0	0	0	0	35	0	34	0	0		69			2			MESSAGE		MESSAGE
'Lifetime|Hydrogen|Coal|w/o CCS'	0	0	0	0	0	0	0	0	35	0	34	0	0		69			2			MESSAGE		MESSAGE
'Lifetime|Hydrogen|Electricity'	0	0	0	0	0	0	0	0	35	0	34	0	0		69			2			MESSAGE		MESSAGE
'Lifetime|Hydrogen|Gas|w/ CCS'	0	0	0	0	0	0	0	0	35	0	34	0	0		69			2			MESSAGE		MESSAGE
'Lifetime|Hydrogen|Gas|w/o CCS'	0	0	0	0	0	0	0	0	35	0	34	0	0		69			2			MESSAGE		MESSAGE
'Lifetime|Liquids|Biomass|w/ CCS'	0	0	0	0	0	0	0	0	35	0	34	0	0		69			2			MESSAGE		MESSAGE
'Lifetime|Liquids|Biomass|w/o CCS'	0	0	0	0	0	0	0	0	35	0	34	0	0		69			2			MESSAGE		MESSAGE
'Lifetime|Liquids|Coal|w/ CCS'	0	0	0	0	0	0	0	0	35	0	34	0	0		69			2			MESSAGE		MESSAGE
'Lifetime|Liquids|Coal|w/o CCS'	0	0	0	0	0	0	0	0	35	0	34	0	0		69			2			MESSAGE		MESSAGE
'Lifetime|Liquids|Gas|w/ CCS'	0	0	0	0	0	0	0	0	35	0	0	0	0		35			1			MESSAGE		0
'Lifetime|Liquids|Gas|w/o CCS'	0	0	0	0	0	0	0	0	35	0	0	0	0		35			1			MESSAGE		0
'Lifetime|Liquids|Oil'	0	0	0	0	0	0	0	0	0	0	34	0	0		34			1			REMIND		0
'Material recycling|Chemicals'	0	0	0	0	0	0	7	0	0	0	0	0	0		7			1			IMAGE		0
'Material recycling|Plastics'	0	0	0	0	0	0	7	0	0	0	0	0	0		7			1			IMAGE		0
'OM Cost|Fixed|Electricity|Biomass|w/ CCS'	0	0	0	0	0	0	0	0	0	5	34	0	1		40			3			REMIND		REMIND
'OM Cost|Fixed|Electricity|Biomass|w/o CCS'	3	0	0	0	0	0	0	0	0	5	34	0	1		43			4			REMIND		REMIND
'OM Cost|Fixed|Electricity|Coal|w/ CCS'	0	0	0	0	0	0	0	0	0	5	34	0	1		40			3			REMIND		REMIND
'OM Cost|Fixed|Electricity|Coal|w/o CCS'	3	0	0	0	0	0	0	0	0	5	34	0	1		43			4			REMIND		REMIND
'OM Cost|Fixed|Electricity|Gas|w/ CCS'	0	0	0	0	0	0	0	0	0	5	34	0	1		40			3			REMIND		REMIND
'OM Cost|Fixed|Electricity|Gas|w/o CCS'	3	0	0	0	0	0	0	0	0	5	34	0	1		43			4			REMIND		REMIND
'OM Cost|Fixed|Electricity|Geothermal'	3	0	0	0	0	0	0	0	35	5	34	0	0		77			4			MESSAGE		MESSAGE
'OM Cost|Fixed|Electricity|Hydro'	3	0	0	0	0	0	0	0	35	5	34	0	1		78			5			MESSAGE		MESSAGE
'OM Cost|Fixed|Electricity|Nuclear'	3	0	0	0	0	0	0	0	35	5	34	0	1		78			5			MESSAGE		MESSAGE
'OM Cost|Fixed|Electricity|Solar|CSP'	0	0	0	0	0	0	0	0	0	5	34	0	1		40			3			REMIND		REMIND
'OM Cost|Fixed|Electricity|Solar|PV'	3	0	0	0	0	0	0	0	35	5	34	0	1		78			5			MESSAGE		MESSAGE
'OM Cost|Fixed|Electricity|Wind'	3	0	0	0	0	0	0	0	0	0	18	0	1		22			3			REMIND		REMIND
'OM Cost|Fixed|Electricity|Wind|Offshore'	0	0	0	0	0	0	0	0	35	5	16	0	1		57			4			MESSAGE		MESSAGE
'OM Cost|Fixed|Electricity|Wind|Onshore'	3	0	0	0	0	0	0	0	35	5	16	0	1		60			5			MESSAGE		MESSAGE
'OM Cost|Fixed|Gases|Biomass|w/o CCS'	0	0	0	0	0	0	0	0	35	0	34	0	0		69			2			MESSAGE		MESSAGE
'OM Cost|Fixed|Gases|Coal|w/o CCS'	0	0	0	0	0	0	0	0	35	0	34	0	0		69			2			MESSAGE		MESSAGE
'OM Cost|Fixed|Hydrogen|Biomass|w/ CCS'	0	0	0	0	0	0	0	0	35	4	34	0	0		73			3			MESSAGE		MESSAGE
'OM Cost|Fixed|Hydrogen|Biomass|w/o CCS'	0	0	0	0	0	0	0	0	35	4	34	0	0		73			3			MESSAGE		MESSAGE
'OM Cost|Fixed|Hydrogen|Coal|w/ CCS'	0	0	0	0	0	0	0	0	35	4	34	0	0		73			3			MESSAGE		MESSAGE
'OM Cost|Fixed|Hydrogen|Coal|w/o CCS'	0	0	0	0	0	0	0	0	35	4	34	0	0		73			3			MESSAGE		MESSAGE
'OM Cost|Fixed|Hydrogen|Electricity'	0	0	0	0	0	0	0	0	35	4	34	0	0		73			3			MESSAGE		MESSAGE
'OM Cost|Fixed|Hydrogen|Gas|w/ CCS'	0	0	0	0	0	0	0	0	35	4	34	0	0		73			3			MESSAGE		MESSAGE
'OM Cost|Fixed|Hydrogen|Gas|w/o CCS'	0	0	0	0	0	0	0	0	35	4	34	0	0		73			3			MESSAGE		MESSAGE
'OM Cost|Fixed|Liquids|Biomass|w/ CCS'	3	0	0	0	0	0	0	0	35	4	34	0	0		76			4			MESSAGE		MESSAGE
'OM Cost|Fixed|Liquids|Biomass|w/o CCS'	3	0	0	0	0	0	0	0	35	4	34	0	0		76			4			MESSAGE		MESSAGE
'OM Cost|Fixed|Liquids|Coal|w/ CCS'	0	0	0	0	0	0	0	0	35	0	34	0	0		69			2			MESSAGE		MESSAGE
'OM Cost|Fixed|Liquids|Coal|w/o CCS'	0	0	0	0	0	0	0	0	35	0	34	0	0		69			2			MESSAGE		MESSAGE
'OM Cost|Fixed|Liquids|Gas|w/ CCS'	0	0	0	0	0	0	0	0	35	0	0	0	0		35			1			MESSAGE		0
'OM Cost|Fixed|Liquids|Gas|w/o CCS'	0	0	0	0	0	0	0	0	35	0	0	0	0		35			1			MESSAGE		0
'OM Cost|Fixed|Liquids|Oil'	3	0	0	0	0	0	0	0	0	0	34	0	0		37			2			REMIND		REMIND
'Policy Cost|Additional Total Energy System Cost'	0	0	4	0	0	0	0	0	0	0	16	0	2		22			3			REMIND		REMIND
'Policy Cost|Area under MAC Curve'	0	0	0	0	0	0	9	0	0	10	0	0	0		19			2			POLES		POLES
'Policy Cost|Consumption Loss'	3	0	0	0	0	10	0	0	22	0	40	0	2		77			5			REMIND		REMIND
'Policy Cost|Default for CAV'	0	0	0	0	0	0	7	0	0	0	0	0	1		8			2			IMAGE		IMAGE
'Policy Cost|Equivalent Variation'	0	0	0	0	0	0	0	0	0	0	0	0	0		0			0			0		0
'Policy Cost|GDP Loss'	3	0	4	0	2	10	0	0	22	0	40	0	2		83			7			REMIND		REMIND
'Policy Cost|Other'	0	0	0	0	0	0	0	0	0	0	20	0	0		20			1			REMIND		0
'Policy Cost|Welfare Change'	0	0	0	0	0	0	0	0	0	0	0	0	1		1			1			WITCH		0
'Population'	3	2	0	0	6	10	9	0	43	10	44	0	2		129			9			REMIND		REMIND
'Population|Electricity Access'	0	0	0	0	0	0	7	0	0	0	0	0	0		7			1			IMAGE		0
'Population|Extreme poverty'	0	0	0	0	0	0	0	0	0	0	0	0	0		0			0			0		0
'Population|Female'	0	0	0	0	0	0	0	0	0	0	0	0	0		0			0			0		0
'Population|Male'	0	0	0	0	0	0	0	0	0	0	0	0	0		0			0			0		0
'Population|Relying on Solid Fuels'	0	0	0	0	0	0	8	0	1	0	1	0	0		10			3			IMAGE		IMAGE
'Population|Risk of Hunger'	3	0	0	0	0	0	1	0	1	0	12	0	0		17			4			REMIND		REMIND
'Population|Rural'	0	0	0	0	0	0	7	0	35	5	0	0	0		47			3			MESSAGE		MESSAGE
'Population|Urban'	0	0	0	0	0	0	7	0	35	5	0	0	0		47			3			MESSAGE		MESSAGE
'Population|Urban|Share'	0	0	0	0	0	0	0	0	0	0	0	0	0		0			0			0		0
'Population|Working Age'	0	0	0	0	0	0	0	0	0	0	0	0	0		0			0			0		0
'Premature Deaths|PM2.5'	0	0	0	0	0	0	0	0	0	0	0	0	0		0			0			0		0
'Price|Agriculture|Corn|Index'	3	0	0	0	2	0	0	0	0	0	0	0	0		5			2			AIM		AIM
'Price|Agriculture|Livestock|Index'	0	0	0	0	0	0	7	0	0	0	0	0	0		7			1			IMAGE		0
'Price|Agriculture|Non-Energy Crops and Livestock|Index'	3	0	0	0	0	0	8	0	1	4	12	0	1		29			6			REMIND		REMIND
'Price|Agriculture|Non-Energy Crops|Index'	3	0	0	0	2	0	7	0	0	0	0	0	1		13			4			IMAGE		IMAGE
'Price|Agriculture|Rice|Index'	0	0	0	0	0	0	6	0	0	0	0	0	0		6			1			IMAGE		0
'Price|Agriculture|Soybean|Index'	3	0	0	0	2	0	6	0	0	0	0	0	0		11			3			IMAGE		IMAGE
'Price|Agriculture|Wheat|Index'	3	0	0	0	2	0	6	0	0	0	0	0	0		11			3			IMAGE		IMAGE
'Price|Carbon'	3	0	4	0	2	10	9	0	43	10	44	0	2		127			9			REMIND		REMIND
'Price|Final Energy|Residential and Commercial|Residential|Electricity'	0	0	0	0	2	0	0	0	24	0	31	0	1		58			4			REMIND		REMIND
'Price|Final Energy|Residential and Commercial|Residential|Gases|Natural Gas'	0	0	0	0	2	0	0	0	24	0	31	0	0		57			3			REMIND		REMIND
'Price|Final Energy|Residential and Commercial|Residential|Liquids|Biomass'	0	0	0	0	0	0	0	0	24	0	13	0	0		37			2			MESSAGE		MESSAGE
'Price|Final Energy|Residential and Commercial|Residential|Liquids|Oil'	0	0	0	0	0	0	0	0	24	0	31	0	0		55			2			REMIND		REMIND
'Price|Final Energy|Residential and Commercial|Residential|Solids|Biomass'	0	0	0	0	0	0	0	0	24	0	31	0	0		55			2			REMIND		REMIND
'Price|Final Energy|Residential and Commercial|Residential|Solids|Coal'	0	0	0	0	0	0	0	0	24	0	31	0	0		55			2			REMIND		REMIND
'Price|Final Energy|Transportation|Electricity'	0	0	0	0	0	0	0	0	0	0	20	0	0		20			1			REMIND		0
'Price|Final Energy|Transportation|Gases'	0	0	0	0	0	0	0	0	0	0	1	0	0		1			1			REMIND		0
'Price|Final Energy|Transportation|Hydrogen'	0	0	0	0	2	0	0	0	0	0	7	0	0		9			2			REMIND		REMIND
'Price|Final Energy|Transportation|Liquids'	0	0	0	0	2	0	0	0	0	0	20	0	0		22			2			REMIND		REMIND
'Price|Final Energy|Transportation|Liquids|Bioenergy'	0	0	0	0	0	0	0	0	0	0	13	0	0		13			1			REMIND		0
'Price|Primary Energy|Biomass'	3	0	0	0	2	0	0	0	35	5	40	0	1		86			6			REMIND		REMIND
'Price|Primary Energy|Coal'	3	0	0	0	2	0	8	0	35	10	40	0	1		99			7			REMIND		REMIND
'Price|Primary Energy|Gas'	3	0	0	0	2	0	8	0	35	10	40	0	1		99			7			REMIND		REMIND
'Price|Primary Energy|Oil'	3	0	0	0	2	0	8	0	35	10	40	0	1		99			7			REMIND		REMIND
'Price|Secondary Energy|Electricity'	3	0	0	0	2	0	8	0	35	5	40	0	1		94			7			REMIND		REMIND
'Price|Secondary Energy|Gases|Natural Gas'	0	0	0	0	2	0	7	0	0	5	36	0	1		51			5			REMIND		REMIND
'Price|Secondary Energy|Hydrogen'	0	0	0	0	2	0	0	0	35	0	36	0	0		73			3			REMIND		REMIND
'Price|Secondary Energy|Liquids'	3	0	0	0	2	0	0	0	35	5	40	0	0		85			5			REMIND		REMIND
'Price|Secondary Energy|Liquids|Biomass'	3	0	0	0	2	0	0	0	35	5	36	0	1		82			6			REMIND		REMIND
'Price|Secondary Energy|Liquids|Oil'	0	0	0	0	2	0	7	0	35	5	20	0	1		70			6			MESSAGE		MESSAGE
'Price|Secondary Energy|Solids|Biomass'	0	0	0	0	0	0	7	0	0	4	0	0	0		11			2			IMAGE		IMAGE
'Price|Secondary Energy|Solids|Coal'	0	0	0	0	2	0	7	0	0	5	29	0	1		44			5			REMIND		REMIND
'Primary Energy'	3	0	4	0	5	10	9	0	43	10	44	0	2		130			9			REMIND		REMIND
'Primary Energy|Biomass'	3	0	4	0	5	10	9	0	43	10	44	0	2		130			9			REMIND		REMIND
'Primary Energy|Biomass|1st Generation'	3	0	0	0	5	0	7	0	35	5	17	0	0		72			6			MESSAGE		MESSAGE
'Primary Energy|Biomass|Electricity'	3	0	0	0	0	10	7	0	39	5	37	0	0		101			6			MESSAGE		MESSAGE
'Primary Energy|Biomass|Electricity|w/ CCS'	3	0	0	0	0	10	7	0	39	5	33	0	0		97			6			MESSAGE		MESSAGE
'Primary Energy|Biomass|Electricity|w/o CCS'	3	0	0	0	0	10	7	0	39	5	33	0	0		97			6			MESSAGE		MESSAGE
'Primary Energy|Biomass|Energy Crops'	3	0	0	0	0	0	7	0	35	5	17	0	0		67			5			MESSAGE		MESSAGE
'Primary Energy|Biomass|Gases'	0	0	0	0	0	0	0	0	35	0	17	0	0		52			2			MESSAGE		MESSAGE
'Primary Energy|Biomass|Hydrogen'	0	0	0	0	0	0	7	0	35	0	17	0	0		59			3			MESSAGE		MESSAGE
'Primary Energy|Biomass|Liquids'	3	0	0	0	0	0	7	0	35	0	17	0	0		62			4			MESSAGE		MESSAGE
'Primary Energy|Biomass|Modern'	3	0	0	0	5	10	8	0	41	10	37	0	1		115			8			MESSAGE		MESSAGE
'Primary Energy|Biomass|Modern|w/ CCS'	0	0	4	0	3	0	8	0	31	6	39	0	2		93			7			REMIND		REMIND
'Primary Energy|Biomass|Modern|w/o CCS'	0	0	4	0	3	0	8	0	31	6	24	0	2		78			7			MESSAGE		MESSAGE
'Primary Energy|Biomass|Residues'	3	0	0	0	0	0	7	0	35	5	17	0	0		67			5			MESSAGE		MESSAGE
'Primary Energy|Biomass|Solids'	3	0	0	0	0	0	7	0	35	0	17	0	0		62			4			MESSAGE		MESSAGE
'Primary Energy|Biomass|Traditional'	3	0	0	0	5	10	8	0	37	10	37	0	1		111			8			MESSAGE		MESSAGE
'Primary Energy|Coal'	3	0	4	0	5	10	9	0	43	10	44	0	2		130			9			REMIND		REMIND
'Primary Energy|Coal|Electricity'	3	0	0	0	0	10	7	0	35	6	35	0	0		96			6			MESSAGE		MESSAGE
'Primary Energy|Coal|Electricity|w/ CCS'	3	0	0	0	0	10	7	0	35	5	31	0	0		91			6			MESSAGE		MESSAGE
'Primary Energy|Coal|Electricity|w/o CCS'	3	0	0	0	0	10	7	0	35	5	31	0	0		91			6			MESSAGE		MESSAGE
'Primary Energy|Coal|Gases'	0	0	0	0	0	0	0	0	35	0	17	0	0		52			2			MESSAGE		MESSAGE
'Primary Energy|Coal|Hydrogen'	0	0	0	0	0	0	7	0	35	0	17	0	0		59			3			MESSAGE		MESSAGE
'Primary Energy|Coal|Liquids'	0	0	0	0	0	0	0	0	35	0	17	0	0		52			2			MESSAGE		MESSAGE
'Primary Energy|Coal|Solids'	0	0	0	0	0	0	0	0	35	0	17	0	0		52			2			MESSAGE		MESSAGE
'Primary Energy|Coal|w/ CCS'	3	0	4	0	5	10	9	0	43	10	43	0	2		129			9			MESSAGE		MESSAGE
'Primary Energy|Coal|w/o CCS'	3	0	4	0	5	10	9	0	43	10	43	0	2		129			9			MESSAGE		MESSAGE
'Primary Energy|Fossil'	3	0	4	0	5	10	9	0	43	10	44	0	2		130			9			REMIND		REMIND
'Primary Energy|Fossil|w/ CCS'	3	0	4	0	2	10	8	0	41	10	44	0	1		123			9			REMIND		REMIND
'Primary Energy|Fossil|w/o CCS'	3	0	4	0	2	10	8	0	41	10	44	0	1		123			9			REMIND		REMIND
'Primary Energy|Gas'	3	0	4	0	5	10	9	0	43	10	44	0	2		130			9			REMIND		REMIND
'Primary Energy|Gas|Electricity'	3	0	0	0	0	10	7	0	35	5	36	0	0		96			6			REMIND		REMIND
'Primary Energy|Gas|Electricity|w/ CCS'	3	0	0	0	0	10	7	0	35	5	31	0	0		91			6			MESSAGE		MESSAGE
'Primary Energy|Gas|Electricity|w/o CCS'	3	0	0	0	0	10	7	0	35	5	31	0	0		91			6			MESSAGE		MESSAGE
'Primary Energy|Gas|Gases'	0	0	0	0	0	0	0	0	35	0	18	0	0		53			2			MESSAGE		MESSAGE
'Primary Energy|Gas|Hydrogen'	0	0	0	0	0	0	7	0	35	0	18	0	1		61			4			MESSAGE		MESSAGE
'Primary Energy|Gas|Liquids'	0	0	0	0	0	0	0	0	35	0	18	0	0		53			2			MESSAGE		MESSAGE
'Primary Energy|Gas|Solids'	0	0	0	0	0	0	0	0	35	0	0	0	0		35			1			MESSAGE		0
'Primary Energy|Gas|w/ CCS'	3	0	4	0	5	10	9	0	43	10	44	0	2		130			9			REMIND		REMIND
'Primary Energy|Gas|w/o CCS'	3	0	4	0	5	10	9	0	43	10	44	0	2		130			9			REMIND		REMIND
'Primary Energy|Geothermal'	3	0	4	0	0	10	1	0	42	6	27	0	1		94			8			MESSAGE		MESSAGE
'Primary Energy|Hydro'	3	0	4	0	0	10	8	0	42	6	27	0	2		102			8			MESSAGE		MESSAGE
'Primary Energy|Non-Biomass Renewables'	3	0	4	0	5	10	9	0	43	10	44	0	2		130			9			REMIND		REMIND
'Primary Energy|Non-Biomass Renewables|Geothermal'	0	0	0	0	5	0	0	0	0	0	13	0	0		18			2			REMIND		REMIND
'Primary Energy|Non-Biomass Renewables|Hydro'	0	0	0	0	5	0	7	0	0	0	13	0	0		25			3			REMIND		REMIND
'Primary Energy|Non-Biomass Renewables|Ocean'	0	0	0	0	0	0	0	0	0	0	0	0	0		0			0			0		0
'Primary Energy|Non-Biomass Renewables|Solar'	0	0	0	0	5	0	7	0	0	0	13	0	0		25			3			REMIND		REMIND
'Primary Energy|Non-Biomass Renewables|Wind'	0	0	0	0	5	0	7	0	0	0	13	0	0		25			3			REMIND		REMIND
'Primary Energy|Nuclear'	3	0	4	0	5	10	9	0	43	10	44	0	2		130			9			REMIND		REMIND
'Primary Energy|Ocean'	0	0	0	0	0	10	0	0	35	6	0	0	0		51			3			MESSAGE		MESSAGE
'Primary Energy|Oil'	3	0	4	0	5	10	9	0	43	10	44	0	2		130			9			REMIND		REMIND
'Primary Energy|Oil|Electricity'	3	0	0	0	0	10	7	0	35	5	11	0	1		72			7			MESSAGE		MESSAGE
'Primary Energy|Oil|Electricity|w/ CCS'	3	0	0	0	0	10	7	0	35	5	11	0	0		71			6			MESSAGE		MESSAGE
'Primary Energy|Oil|Electricity|w/o CCS'	3	0	0	0	0	10	7	0	35	5	11	0	0		71			6			MESSAGE		MESSAGE
'Primary Energy|Oil|Gases'	0	0	0	0	0	0	0	0	35	0	0	0	0		35			1			MESSAGE		0
'Primary Energy|Oil|Hydrogen'	0	0	0	0	0	0	7	0	35	0	0	0	0		42			2			MESSAGE		MESSAGE
'Primary Energy|Oil|Liquids'	0	0	0	0	0	0	0	0	35	0	0	0	0		35			1			MESSAGE		0
'Primary Energy|Oil|Solids'	0	0	0	0	0	0	0	0	35	0	0	0	0		35			1			MESSAGE		0
'Primary Energy|Oil|w/ CCS'	3	0	4	0	5	10	9	0	0	6	16	0	0		53			7			REMIND		REMIND
'Primary Energy|Oil|w/o CCS'	3	0	4	0	5	10	9	0	43	9	42	0	2		127			9			MESSAGE		MESSAGE
'Primary Energy|Other'	3	0	0	0	0	10	9	0	39	5	0	0	0		66			5			MESSAGE		MESSAGE
'Primary Energy|Renewables (incl. Biomass)'	3	0	4	0	5	10	9	0	43	10	44	0	2		130			9			REMIND		REMIND
'Primary Energy|Secondary Energy Trade'	3	0	0	0	0	0	0	0	41	10	0	0	0		54			3			MESSAGE		MESSAGE
'Primary Energy|Solar'	3	0	4	0	0	10	8	0	42	6	27	0	2		102			8			MESSAGE		MESSAGE
'Primary Energy|Wind'	3	0	4	0	0	10	8	0	42	6	27	0	2		102			8			MESSAGE		MESSAGE
'Production|Cement'	0	0	4	0	2	0	7	0	0	0	1	0	0		14			4			IMAGE		IMAGE
'Production|Chemicals'	0	0	0	0	0	0	7	0	0	0	0	0	0		7			1			IMAGE		0
'Production|Non-ferrous metals'	0	0	0	0	2	0	0	0	0	0	0	0	0		2			1			GCAM		0
'Production|Pulp and Paper'	0	0	0	0	0	0	7	0	0	0	0	0	0		7			1			IMAGE		0
'Production|Steel'	0	0	4	0	2	0	7	0	0	0	1	0	0		14			4			IMAGE		IMAGE
'Resource|Extraction|Coal'	0	0	0	0	0	0	0	0	11	0	7	0	0		18			2			MESSAGE		MESSAGE
'Resource|Extraction|Fossil'	0	0	0	0	0	0	0	0	0	0	0	0	0		0			0			0		0
'Resource|Extraction|Gas'	0	0	0	0	0	0	0	0	11	0	7	0	0		18			2			MESSAGE		MESSAGE
'Resource|Extraction|Oil'	0	0	0	0	0	0	0	0	11	0	7	0	0		18			2			MESSAGE		MESSAGE
'Resource|Use|Mineral|Electricity'	0	0	0	0	0	0	1	0	1	0	1	0	0		3			3			IMAGE		IMAGE
'Revenue|government'	0	0	0	0	0	0	0	0	0	0	0	0	0		0			0			0		0
'Secondary Energy'	3	0	4	0	2	10	7	0	35	5	18	0	1		85			9			MESSAGE		MESSAGE
'Secondary Energy|Electricity'	3	0	4	0	6	10	9	0	43	10	44	0	2		131			9			REMIND		REMIND
'Secondary Energy|Electricity|Biomass'	3	0	4	0	6	10	9	0	43	10	44	0	2		131			9			REMIND		REMIND
'Secondary Energy|Electricity|Biomass|w/ CCS'	3	0	4	0	6	10	9	0	43	10	44	0	2		131			9			REMIND		REMIND
'Secondary Energy|Electricity|Biomass|w/o CCS'	3	0	4	0	6	10	9	0	43	10	44	0	2		131			9			REMIND		REMIND
'Secondary Energy|Electricity|Coal'	3	0	4	0	6	10	9	0	43	10	44	0	2		131			9			REMIND		REMIND
'Secondary Energy|Electricity|Coal|w/ CCS'	3	0	4	0	6	10	9	0	43	10	44	0	2		131			9			REMIND		REMIND
'Secondary Energy|Electricity|Coal|w/o CCS'	3	0	4	0	6	10	9	0	43	10	44	0	2		131			9			REMIND		REMIND
'Secondary Energy|Electricity|Curtailment'	3	0	0	0	0	0	7	0	0	0	18	0	0		28			3			REMIND		REMIND
'Secondary Energy|Electricity|Fossil'	3	0	4	0	6	10	9	0	43	10	44	0	2		131			9			REMIND		REMIND
'Secondary Energy|Electricity|Fossil|w/ CCS'	3	0	4	0	0	0	7	0	35	5	0	0	1		55			6			MESSAGE		MESSAGE
'Secondary Energy|Electricity|Fossil|w/o CCS'	3	0	4	0	2	10	7	0	35	5	0	0	1		67			8			MESSAGE		MESSAGE
'Secondary Energy|Electricity|Gas'	3	0	4	0	6	10	9	0	43	10	44	0	2		131			9			REMIND		REMIND
'Secondary Energy|Electricity|Gas|w/ CCS'	3	0	4	0	6	10	9	0	43	10	44	0	2		131			9			REMIND		REMIND
'Secondary Energy|Electricity|Gas|w/o CCS'	3	0	4	0	6	10	9	0	43	10	44	0	2		131			9			REMIND		REMIND
'Secondary Energy|Electricity|Geothermal'	3	0	4	0	6	10	0	0	43	10	44	0	0		120			7			REMIND		REMIND
'Secondary Energy|Electricity|Hydro'	3	0	4	0	6	10	9	0	43	10	44	0	2		131			9			REMIND		REMIND
'Secondary Energy|Electricity|Non-Biomass Renewables'	3	0	4	0	6	10	9	0	43	10	44	0	2		131			9			REMIND		REMIND
'Secondary Energy|Electricity|Nuclear'	3	0	4	0	6	10	9	0	43	10	44	0	2		131			9			REMIND		REMIND
'Secondary Energy|Electricity|Ocean'	0	0	0	0	0	0	0	0	0	10	0	0	0		10			1			POLES		0
'Secondary Energy|Electricity|Oil'	3	0	4	0	6	10	9	0	43	10	44	0	2		131			9			REMIND		REMIND
'Secondary Energy|Electricity|Oil|w/ CCS'	3	0	4	0	4	10	9	0	0	5	0	0	0		35			6			GEM-E3		GEM-E3
'Secondary Energy|Electricity|Oil|w/o CCS'	3	0	4	0	6	10	9	0	28	10	42	0	2		114			9			REMIND		REMIND
'Secondary Energy|Electricity|Other'	3	0	0	0	0	10	7	0	35	5	5	0	0		65			6			MESSAGE		MESSAGE
'Secondary Energy|Electricity|Renewables (incl. Biomass)'	3	0	4	0	6	10	9	0	43	10	44	0	2		131			9			REMIND		REMIND
'Secondary Energy|Electricity|Solar'	3	0	4	0	6	10	9	0	43	10	44	0	2		131			9			REMIND		REMIND
'Secondary Energy|Electricity|Solar|CSP'	0	0	4	0	6	0	8	0	37	10	40	0	1		106			7			REMIND		REMIND
'Secondary Energy|Electricity|Solar|PV'	3	0	4	0	6	0	8	0	37	10	40	0	1		109			8			REMIND		REMIND
'Secondary Energy|Electricity|Storage Losses'	0	0	0	0	0	0	7	0	35	0	0	0	0		42			2			MESSAGE		MESSAGE
'Secondary Energy|Electricity|Transmission Losses'	3	0	0	0	0	0	0	0	35	0	0	0	0		38			2			MESSAGE		MESSAGE
'Secondary Energy|Electricity|Wind'	3	0	4	0	6	10	9	0	43	10	44	0	2		131			9			REMIND		REMIND
'Secondary Energy|Electricity|Wind|Offshore'	0	0	4	0	6	0	8	0	37	10	0	0	1		66			6			MESSAGE		MESSAGE
'Secondary Energy|Electricity|Wind|Onshore'	3	0	4	0	6	0	8	0	37	10	0	0	1		69			7			MESSAGE		MESSAGE
'Secondary Energy|Gases'	3	0	4	0	2	0	9	0	43	10	44	0	2		117			8			REMIND		REMIND
'Secondary Energy|Gases|Biomass'	0	0	0	0	2	0	0	0	37	10	42	0	0		91			4			REMIND		REMIND
'Secondary Energy|Gases|Coal'	0	0	0	0	2	0	0	0	37	10	42	0	0		91			4			REMIND		REMIND
'Secondary Energy|Gases|Natural Gas'	3	0	4	0	2	0	8	0	37	10	42	0	1		107			8			REMIND		REMIND
'Secondary Energy|Gases|Other'	0	0	0	0	0	0	0	0	35	0	5	0	0		40			2			MESSAGE		MESSAGE
'Secondary Energy|Heat'	3	0	0	0	0	0	0	0	41	10	44	0	0		98			4			REMIND		REMIND
'Secondary Energy|Heat|Biomass'	3	0	0	0	0	0	0	0	35	0	34	0	0		72			3			MESSAGE		MESSAGE
'Secondary Energy|Heat|Coal'	3	0	0	0	0	0	0	0	35	0	34	0	0		72			3			MESSAGE		MESSAGE
'Secondary Energy|Heat|Fossil'	3	0	0	0	0	0	0	0	35	0	34	0	0		72			3			MESSAGE		MESSAGE
'Secondary Energy|Heat|Gas'	3	0	0	0	0	0	0	0	35	0	34	0	0		72			3			MESSAGE		MESSAGE
'Secondary Energy|Heat|Geothermal'	3	0	0	0	0	0	0	0	36	0	36	0	0		75			3			MESSAGE		MESSAGE
'Secondary Energy|Heat|Non-Biomass Renewables'	3	0	0	0	0	0	0	0	36	5	36	0	0		80			4			MESSAGE		MESSAGE
'Secondary Energy|Heat|Nuclear'	3	0	0	0	0	0	0	0	0	0	0	0	0		3			1			AIM		0
'Secondary Energy|Heat|Oil'	3	0	0	0	0	0	0	0	35	0	0	0	0		38			2			MESSAGE		MESSAGE
'Secondary Energy|Heat|Other'	0	0	0	0	0	0	0	0	35	0	0	0	0		35			1			MESSAGE		0
'Secondary Energy|Heat|Renewables (incl. Biomass)'	3	0	0	0	0	0	0	0	36	5	36	0	0		80			4			MESSAGE		MESSAGE
'Secondary Energy|Heat|Solar'	0	0	0	0	0	0	0	0	0	5	0	0	0		5			1			POLES		0
'Secondary Energy|Hydrogen'	0	0	4	0	2	0	9	0	39	10	42	0	1		107			7			REMIND		REMIND
'Secondary Energy|Hydrogen|Biomass'	0	0	0	0	2	0	7	0	36	6	38	0	0		89			5			REMIND		REMIND
'Secondary Energy|Hydrogen|Biomass|w/ CCS'	0	0	0	0	2	0	7	0	36	6	38	0	0		89			5			REMIND		REMIND
'Secondary Energy|Hydrogen|Biomass|w/o CCS'	0	0	0	0	2	0	7	0	36	6	38	0	0		89			5			REMIND		REMIND
'Secondary Energy|Hydrogen|Coal'	0	0	0	0	2	0	7	0	35	5	34	0	0		83			5			MESSAGE		MESSAGE
'Secondary Energy|Hydrogen|Coal|w/ CCS'	0	0	0	0	0	0	7	0	35	5	34	0	0		81			4			MESSAGE		MESSAGE
'Secondary Energy|Hydrogen|Coal|w/o CCS'	0	0	0	0	2	0	7	0	35	5	34	0	0		83			5			MESSAGE		MESSAGE
'Secondary Energy|Hydrogen|Electricity'	0	0	0	0	2	0	7	0	36	6	38	0	1		90			6			REMIND		REMIND
'Secondary Energy|Hydrogen|Fossil'	0	0	0	0	2	0	7	0	35	6	36	0	1		87			6			REMIND		REMIND
'Secondary Energy|Hydrogen|Fossil|w/ CCS'	0	0	0	0	2	0	7	0	35	1	36	0	0		81			5			REMIND		REMIND
'Secondary Energy|Hydrogen|Fossil|w/o CCS'	0	0	0	0	2	0	7	0	35	1	36	0	0		81			5			REMIND		REMIND
'Secondary Energy|Hydrogen|Gas'	0	0	0	0	2	0	7	0	35	5	34	0	1		84			6			MESSAGE		MESSAGE
'Secondary Energy|Hydrogen|Gas|w/ CCS'	0	0	0	0	2	0	7	0	35	5	34	0	1		84			6			MESSAGE		MESSAGE
'Secondary Energy|Hydrogen|Gas|w/o CCS'	0	0	0	0	2	0	7	0	35	5	34	0	1		84			6			MESSAGE		MESSAGE
'Secondary Energy|Hydrogen|Non-Biomass Renewables'	0	0	0	0	0	0	7	0	0	5	0	0	0		12			2			IMAGE		IMAGE
'Secondary Energy|Hydrogen|Nuclear'	0	0	0	0	0	0	0	0	0	5	0	0	0		5			1			POLES		0
'Secondary Energy|Hydrogen|Oil'	0	0	0	0	0	0	7	0	0	0	0	0	0		7			1			IMAGE		0
'Secondary Energy|Hydrogen|Other'	0	0	0	0	0	0	0	0	0	5	0	0	0		5			1			POLES		0
'Secondary Energy|Hydrogen|Renewables (incl. Biomass)'	0	0	0	0	2	0	7	0	36	6	38	0	0		89			5			REMIND		REMIND
'Secondary Energy|Hydrogen|Solar'	0	0	0	0	0	0	7	0	0	5	0	0	0		12			2			IMAGE		IMAGE
'Secondary Energy|Liquids'	3	0	4	0	2	0	9	0	43	10	44	0	2		117			8			REMIND		REMIND
'Secondary Energy|Liquids|Biomass'	3	0	4	0	2	0	8	0	41	10	44	0	1		113			8			REMIND		REMIND
'Secondary Energy|Liquids|Biomass|1st Generation'	3	0	0	0	0	0	7	0	0	5	34	0	1		50			5			REMIND		REMIND
'Secondary Energy|Liquids|Biomass|Energy Crops'	3	0	0	0	0	0	7	0	0	5	34	0	1		50			5			REMIND		REMIND
'Secondary Energy|Liquids|Biomass|Other'	0	0	0	0	0	0	7	0	0	0	0	0	0		7			1			IMAGE		0
'Secondary Energy|Liquids|Biomass|Residues'	3	0	0	0	0	0	0	0	0	5	34	0	0		42			3			REMIND		REMIND
'Secondary Energy|Liquids|Biomass|w/ CCS'	3	0	4	0	2	0	7	0	41	10	44	0	0		111			7			REMIND		REMIND
'Secondary Energy|Liquids|Biomass|w/o CCS'	3	0	4	0	2	0	8	0	41	10	44	0	0		112			7			REMIND		REMIND
'Secondary Energy|Liquids|Coal'	0	0	4	0	2	0	0	0	41	10	44	0	0		101			5			REMIND		REMIND
'Secondary Energy|Liquids|Coal|w/ CCS'	0	0	4	0	0	0	0	0	40	9	44	0	0		97			4			REMIND		REMIND
'Secondary Energy|Liquids|Coal|w/o CCS'	0	0	4	0	2	0	0	0	40	9	44	0	0		99			5			REMIND		REMIND
'Secondary Energy|Liquids|Fossil'	3	0	4	0	2	0	7	0	35	5	18	0	1		75			8			MESSAGE		MESSAGE
'Secondary Energy|Liquids|Fossil|w/ CCS'	0	0	4	0	0	0	0	0	35	5	18	0	0		62			4			MESSAGE		MESSAGE
'Secondary Energy|Liquids|Fossil|w/o CCS'	3	0	4	0	2	0	7	0	35	5	18	0	0		74			7			MESSAGE		MESSAGE
'Secondary Energy|Liquids|Gas'	0	0	0	0	2	0	0	0	41	10	20	0	0		73			4			MESSAGE		MESSAGE
'Secondary Energy|Liquids|Gas|w/ CCS'	0	0	0	0	0	0	0	0	40	9	20	0	0		69			3			MESSAGE		MESSAGE
'Secondary Energy|Liquids|Gas|w/o CCS'	0	0	0	0	0	0	0	0	40	9	20	0	0		69			3			MESSAGE		MESSAGE
'Secondary Energy|Liquids|Oil'	3	0	4	0	2	0	8	0	41	10	44	0	1		113			8			REMIND		REMIND
'Secondary Energy|Liquids|Other'	0	0	0	0	0	0	0	0	0	5	0	0	0		5			1			POLES		0
'Secondary Energy|Other Carrier'	0	0	0	0	0	0	0	0	0	0	0	0	0		0			0			0		0
'Secondary Energy|Solids'	3	0	4	0	0	0	8	0	40	10	44	0	1		110			7			REMIND		REMIND
'Secondary Energy|Solids|Biomass'	3	0	4	0	0	0	7	0	35	5	18	0	0		72			6			MESSAGE		MESSAGE
'Secondary Energy|Solids|Coal'	3	0	4	0	0	0	7	0	35	5	18	0	1		73			7			MESSAGE		MESSAGE
'Specific Energy Consumption|Production|Cement'	0	0	0	0	0	0	0	0	0	0	0	0	0		0			0			0		0
'Specific Energy Consumption|Production|Chemicals'	0	0	0	0	0	0	0	0	0	0	0	0	0		0			0			0		0
'Specific Energy Consumption|Production|Chemicals|Ammonia'	0	0	0	0	0	0	0	0	0	0	0	0	0		0			0			0		0
'Specific Energy Consumption|Production|Chemicals|High value chemicals'	0	0	0	0	0	0	0	0	0	0	0	0	0		0			0			0		0
'Specific Energy Consumption|Production|Chemicals|Methanol'	0	0	0	0	0	0	0	0	0	0	0	0	0		0			0			0		0
'Specific Energy Consumption|Production|Steel'	0	0	0	0	0	0	0	0	0	0	0	0	0		0			0			0		0
'Subsidies|Energy'	0	0	0	0	0	0	7	0	0	0	18	0	0		25			2			REMIND		REMIND
'Subsidies|Energy|Fossil'	0	0	0	0	0	0	7	0	0	0	36	0	0		43			2			REMIND		REMIND
'Temperature|Global Mean'	0	2	0	0	4	0	8	0	2	0	19	0	0		35			5			REMIND		REMIND
'Trade'	0	0	4	0	0	0	0	0	24	0	18	0	0		46			3			MESSAGE		MESSAGE
'Trade|Primary Energy|Biomass|Volume'	3	0	4	0	0	0	7	0	24	5	36	0	0		79			6			REMIND		REMIND
'Trade|Primary Energy|Coal|Volume'	3	0	4	0	2	0	7	0	36	5	36	0	1		94			8			MESSAGE		MESSAGE
'Trade|Primary Energy|Gas|Volume'	3	0	4	0	2	0	7	0	36	5	36	0	1		94			8			MESSAGE		MESSAGE
'Trade|Primary Energy|Oil|Volume'	3	0	4	0	2	0	7	0	36	5	36	0	1		94			8			MESSAGE		MESSAGE
'Trade|Secondary Energy|Electricity|Volume'	3	0	0	0	0	0	0	0	36	5	0	0	0		44			3			MESSAGE		MESSAGE
'Trade|Secondary Energy|Hydrogen|Volume'	0	0	0	0	0	0	0	0	36	0	0	0	0		36			1			MESSAGE		0
'Trade|Secondary Energy|Liquids|Biomass|Volume'	3	0	4	0	0	0	0	0	35	0	0	0	0		42			3			MESSAGE		MESSAGE
'Trade|Secondary Energy|Liquids|Coal|Volume'	0	0	0	0	0	0	0	0	35	0	0	0	0		35			1			MESSAGE		0
'Trade|Secondary Energy|Liquids|Oil|Volume'	3	0	4	0	0	0	0	0	35	0	0	0	0		42			3			MESSAGE		MESSAGE
'Trade|Uranium|Mass'	0	0	0	0	0	0	0	0	0	0	34	0	0		34			1			REMIND		0
'Transport|Stock|Road'	0	0	0	0	0	0	0	0	0	0	0	0	0		0			0			0		0
'Transport|Stock|Road|Freight'	0	0	0	0	0	0	0	0	0	0	0	0	0		0			0			0		0
'Transport|Stock|Road|Passenger'	0	0	0	0	0	0	0	0	0	0	0	0	0		0			0			0		0
'Transport|Stock|Road|Passenger|2W&3W'	0	0	0	0	0	0	0	0	0	0	0	0	0		0			0			0		0
'Transport|Stock|Road|Passenger|Bus'	0	0	0	0	0	0	0	0	0	0	0	0	0		0			0			0		0
'Transport|Stock|Road|Passenger|LDV'	0	0	0	0	0	0	0	0	0	0	13	0	0		13			1			REMIND		0
'Unemployment'	0	0	0	0	0	10	0	0	0	0	0	0	0		10			1			GEM-E3		0
'Unemployment|Rate'	3	0	0	0	0	10	0	0	0	0	0	0	0		13			2			GEM-E3		GEM-E3
'Value Added|Agriculture'	3	0	0	0	0	10	0	0	0	0	0	0	0		13			2			GEM-E3		GEM-E3
'Value Added|Industry'	0	0	0	0	0	10	8	0	0	4	0	0	0		22			3			GEM-E3		GEM-E3
'Value Added|Industry|Energy'	3	0	0	0	0	0	0	0	0	0	0	0	0		3			1			AIM		0
'Value Added|Industry|Energy Intensive'	0	0	0	0	0	10	0	0	0	0	0	0	0		10			1			GEM-E3		0
'Value Added|Industry|Manufacturing'	0	0	0	0	0	0	0	0	0	0	0	0	0		0			0			0		0
'Value Added|Residential and Commercial|Commercial'	0	0	0	0	0	10	0	0	0	0	0	0	0		10			1			GEM-E3		0
'Water Consumption'	3	0	0	0	0	0	0	0	35	0	0	0	1		39			3			MESSAGE		MESSAGE
'Water Consumption|Electricity'	3	0	0	0	0	0	9	0	36	0	1	0	1		50			5			MESSAGE		MESSAGE
'Water Consumption|Electricity w/o Hydro'	0	0	0	0	0	0	1	0	1	0	1	0	0		3			3			IMAGE		IMAGE
'Water Consumption|Electricity|Biomass'	3	0	0	0	0	0	7	0	35	0	0	0	1		46			4			MESSAGE		MESSAGE
'Water Consumption|Electricity|Biomass|w/ CCS'	3	0	0	0	0	0	7	0	35	0	0	0	1		46			4			MESSAGE		MESSAGE
'Water Consumption|Electricity|Biomass|w/o CCS'	3	0	0	0	0	0	7	0	35	0	0	0	1		46			4			MESSAGE		MESSAGE
'Water Consumption|Electricity|Coal'	3	0	0	0	0	0	7	0	35	0	0	0	1		46			4			MESSAGE		MESSAGE
'Water Consumption|Electricity|Coal|w/ CCS'	3	0	0	0	0	0	7	0	35	0	0	0	1		46			4			MESSAGE		MESSAGE
'Water Consumption|Electricity|Coal|w/o CCS'	3	0	0	0	0	0	7	0	35	0	0	0	1		46			4			MESSAGE		MESSAGE
'Water Consumption|Electricity|Cooling Pond'	0	0	0	0	0	0	7	0	0	0	0	0	1		8			2			IMAGE		IMAGE
'Water Consumption|Electricity|Dry Cooling'	0	0	0	0	0	0	7	0	35	0	0	0	1		43			3			MESSAGE		MESSAGE
'Water Consumption|Electricity|Fossil'	3	0	0	0	0	0	7	0	35	0	0	0	1		46			4			MESSAGE		MESSAGE
'Water Consumption|Electricity|Fossil|w/ CCS'	3	0	0	0	0	0	7	0	35	0	0	0	1		46			4			MESSAGE		MESSAGE
'Water Consumption|Electricity|Fossil|w/o CCS'	3	0	0	0	0	0	7	0	35	0	0	0	1		46			4			MESSAGE		MESSAGE
'Water Consumption|Electricity|Gas'	3	0	0	0	0	0	7	0	35	0	0	0	1		46			4			MESSAGE		MESSAGE
'Water Consumption|Electricity|Gas|w/ CCS'	3	0	0	0	0	0	7	0	35	0	0	0	1		46			4			MESSAGE		MESSAGE
'Water Consumption|Electricity|Gas|w/o CCS'	3	0	0	0	0	0	7	0	35	0	0	0	1		46			4			MESSAGE		MESSAGE
'Water Consumption|Electricity|Geothermal'	3	0	0	0	0	0	7	0	35	0	0	0	0		45			3			MESSAGE		MESSAGE
'Water Consumption|Electricity|Hydro'	3	0	0	0	0	0	7	0	35	0	0	0	1		46			4			MESSAGE		MESSAGE
'Water Consumption|Electricity|Non-Biomass Renewables'	3	0	0	0	0	0	7	0	35	0	0	0	1		46			4			MESSAGE		MESSAGE
'Water Consumption|Electricity|Nuclear'	3	0	0	0	0	0	7	0	35	0	0	0	1		46			4			MESSAGE		MESSAGE
'Water Consumption|Electricity|Oil'	3	0	0	0	0	0	7	0	35	0	0	0	1		46			4			MESSAGE		MESSAGE
'Water Consumption|Electricity|Oil|w/ CCS'	3	0	0	0	0	0	7	0	0	0	0	0	0		10			2			IMAGE		IMAGE
'Water Consumption|Electricity|Oil|w/o CCS'	3	0	0	0	0	0	7	0	0	0	0	0	1		11			3			IMAGE		IMAGE
'Water Consumption|Electricity|Once Through'	0	0	0	0	0	0	7	0	35	0	0	0	1		43			3			MESSAGE		MESSAGE
'Water Consumption|Electricity|Other'	0	0	0	0	0	0	7	0	35	0	0	0	0		42			2			MESSAGE		MESSAGE
'Water Consumption|Electricity|Sea Cooling'	0	0	0	0	0	0	7	0	35	0	0	0	1		43			3			MESSAGE		MESSAGE
'Water Consumption|Electricity|Solar'	0	0	0	0	0	0	7	0	35	0	0	0	1		43			3			MESSAGE		MESSAGE
'Water Consumption|Electricity|Solar|CSP'	0	0	0	0	0	0	7	0	35	0	0	0	1		43			3			MESSAGE		MESSAGE
'Water Consumption|Electricity|Solar|PV'	0	0	0	0	0	0	7	0	35	0	0	0	1		43			3			MESSAGE		MESSAGE
'Water Consumption|Electricity|Wet Tower'	0	0	0	0	0	0	7	0	35	0	0	0	1		43			3			MESSAGE		MESSAGE
'Water Consumption|Electricity|Wind'	3	0	0	0	0	0	7	0	35	0	0	0	0		45			3			MESSAGE		MESSAGE
'Water Consumption|Extraction'	0	0	0	0	0	0	0	0	35	0	0	0	0		35			1			MESSAGE		0
'Water Consumption|Extraction|Coal'	0	0	0	0	0	0	0	0	35	0	0	0	0		35			1			MESSAGE		0
'Water Consumption|Extraction|Gas'	0	0	0	0	0	0	0	0	35	0	0	0	0		35			1			MESSAGE		0
'Water Consumption|Extraction|Oil'	0	0	0	0	0	0	0	0	35	0	0	0	0		35			1			MESSAGE		0
'Water Consumption|Extraction|Uranium'	0	0	0	0	0	0	0	0	35	0	0	0	0		35			1			MESSAGE		0
'Water Consumption|Gases'	0	0	0	0	0	0	0	0	35	0	0	0	0		35			1			MESSAGE		0
'Water Consumption|Gases|Biomass'	0	0	0	0	0	0	0	0	35	0	0	0	0		35			1			MESSAGE		0
'Water Consumption|Gases|Coal'	0	0	0	0	0	0	0	0	35	0	0	0	0		35			1			MESSAGE		0
'Water Consumption|Heat'	0	0	0	0	0	0	0	0	35	0	0	0	0		35			1			MESSAGE		0
'Water Consumption|Heat|Biomass'	0	0	0	0	0	0	0	0	35	0	0	0	0		35			1			MESSAGE		0
'Water Consumption|Heat|Coal'	0	0	0	0	0	0	0	0	35	0	0	0	0		35			1			MESSAGE		0
'Water Consumption|Heat|Gas'	0	0	0	0	0	0	0	0	35	0	0	0	0		35			1			MESSAGE		0
'Water Consumption|Heat|Geothermal'	0	0	0	0	0	0	0	0	35	0	0	0	0		35			1			MESSAGE		0
'Water Consumption|Heat|Oil'	0	0	0	0	0	0	0	0	35	0	0	0	0		35			1			MESSAGE		0
'Water Consumption|Heat|Other'	0	0	0	0	0	0	0	0	35	0	0	0	0		35			1			MESSAGE		0
'Water Consumption|Hydrogen'	0	0	0	0	0	0	0	0	35	0	0	0	0		35			1			MESSAGE		0
'Water Consumption|Hydrogen|Biomass'	0	0	0	0	0	0	0	0	35	0	0	0	0		35			1			MESSAGE		0
'Water Consumption|Hydrogen|Biomass|w/ CCS'	0	0	0	0	0	0	0	0	35	0	0	0	0		35			1			MESSAGE		0
'Water Consumption|Hydrogen|Biomass|w/o CCS'	0	0	0	0	0	0	0	0	35	0	0	0	0		35			1			MESSAGE		0
'Water Consumption|Hydrogen|Coal'	0	0	0	0	0	0	0	0	35	0	0	0	0		35			1			MESSAGE		0
'Water Consumption|Hydrogen|Coal|w/ CCS'	0	0	0	0	0	0	0	0	35	0	0	0	0		35			1			MESSAGE		0
'Water Consumption|Hydrogen|Coal|w/o CCS'	0	0	0	0	0	0	0	0	35	0	0	0	0		35			1			MESSAGE		0
'Water Consumption|Hydrogen|Electricity'	0	0	0	0	0	0	0	0	35	0	0	0	0		35			1			MESSAGE		0
'Water Consumption|Hydrogen|Fossil'	0	0	0	0	0	0	0	0	35	0	0	0	0		35			1			MESSAGE		0
'Water Consumption|Hydrogen|Fossil|w/ CCS'	0	0	0	0	0	0	0	0	35	0	0	0	0		35			1			MESSAGE		0
'Water Consumption|Hydrogen|Fossil|w/o CCS'	0	0	0	0	0	0	0	0	35	0	0	0	0		35			1			MESSAGE		0
'Water Consumption|Hydrogen|Gas'	0	0	0	0	0	0	0	0	35	0	0	0	0		35			1			MESSAGE		0
'Water Consumption|Hydrogen|Gas|w/ CCS'	0	0	0	0	0	0	0	0	35	0	0	0	0		35			1			MESSAGE		0
'Water Consumption|Hydrogen|Gas|w/o CCS'	0	0	0	0	0	0	0	0	35	0	0	0	0		35			1			MESSAGE		0
'Water Consumption|Industrial Water'	3	0	0	0	0	0	7	0	0	0	0	0	0		10			2			IMAGE		IMAGE
'Water Consumption|Irrigation'	3	0	0	0	0	0	0	0	35	0	16	0	0		54			3			MESSAGE		MESSAGE
'Water Consumption|Liquids'	0	0	0	0	0	0	0	0	35	0	0	0	0		35			1			MESSAGE		0
'Water Consumption|Liquids|Biomass'	0	0	0	0	0	0	0	0	35	0	0	0	0		35			1			MESSAGE		0
'Water Consumption|Liquids|Biomass|w/ CCS'	0	0	0	0	0	0	0	0	35	0	0	0	0		35			1			MESSAGE		0
'Water Consumption|Liquids|Biomass|w/o CCS'	0	0	0	0	0	0	0	0	35	0	0	0	0		35			1			MESSAGE		0
'Water Consumption|Liquids|Coal'	0	0	0	0	0	0	0	0	35	0	0	0	0		35			1			MESSAGE		0
'Water Consumption|Liquids|Coal|w/ CCS'	0	0	0	0	0	0	0	0	35	0	0	0	0		35			1			MESSAGE		0
'Water Consumption|Liquids|Coal|w/o CCS'	0	0	0	0	0	0	0	0	35	0	0	0	0		35			1			MESSAGE		0
'Water Consumption|Liquids|Fossil'	0	0	0	0	0	0	0	0	35	0	0	0	0		35			1			MESSAGE		0
'Water Consumption|Liquids|Fossil|w/ CCS'	0	0	0	0	0	0	0	0	35	0	0	0	0		35			1			MESSAGE		0
'Water Consumption|Liquids|Fossil|w/o CCS'	0	0	0	0	0	0	0	0	35	0	0	0	0		35			1			MESSAGE		0
'Water Consumption|Liquids|Gas'	0	0	0	0	0	0	0	0	35	0	0	0	0		35			1			MESSAGE		0
'Water Consumption|Liquids|Gas|w/ CCS'	0	0	0	0	0	0	0	0	35	0	0	0	0		35			1			MESSAGE		0
'Water Consumption|Liquids|Gas|w/o CCS'	0	0	0	0	0	0	0	0	35	0	0	0	0		35			1			MESSAGE		0
'Water Consumption|Liquids|Oil'	0	0	0	0	0	0	0	0	35	0	0	0	0		35			1			MESSAGE		0
'Water Consumption|Municipal Water'	3	0	0	0	0	0	7	0	0	0	0	0	0		10			2			IMAGE		IMAGE
'Water Withdrawal'	3	0	0	0	0	0	7	0	35	0	0	0	1		46			4			MESSAGE		MESSAGE
'Water Withdrawal|Electricity'	3	0	0	0	0	0	8	0	35	0	0	0	1		47			4			MESSAGE		MESSAGE
'Water Withdrawal|Electricity|Biomass'	3	0	0	0	0	0	7	0	35	0	0	0	1		46			4			MESSAGE		MESSAGE
'Water Withdrawal|Electricity|Biomass|w/ CCS'	3	0	0	0	0	0	7	0	35	0	0	0	1		46			4			MESSAGE		MESSAGE
'Water Withdrawal|Electricity|Biomass|w/o CCS'	3	0	0	0	0	0	7	0	35	0	0	0	1		46			4			MESSAGE		MESSAGE
'Water Withdrawal|Electricity|Coal'	3	0	0	0	0	0	7	0	35	0	0	0	1		46			4			MESSAGE		MESSAGE
'Water Withdrawal|Electricity|Coal|w/ CCS'	3	0	0	0	0	0	7	0	35	0	0	0	1		46			4			MESSAGE		MESSAGE
'Water Withdrawal|Electricity|Coal|w/o CCS'	3	0	0	0	0	0	7	0	35	0	0	0	1		46			4			MESSAGE		MESSAGE
'Water Withdrawal|Electricity|Cooling Pond'	0	0	0	0	0	0	7	0	0	0	0	0	1		8			2			IMAGE		IMAGE
'Water Withdrawal|Electricity|Dry Cooling'	0	0	0	0	0	0	7	0	35	0	0	0	1		43			3			MESSAGE		MESSAGE
'Water Withdrawal|Electricity|Fossil'	3	0	0	0	0	0	7	0	0	0	0	0	1		11			3			IMAGE		IMAGE
'Water Withdrawal|Electricity|Fossil|w/ CCS'	3	0	0	0	0	0	7	0	35	0	0	0	1		46			4			MESSAGE		MESSAGE
'Water Withdrawal|Electricity|Fossil|w/o CCS'	3	0	0	0	0	0	7	0	35	0	0	0	1		46			4			MESSAGE		MESSAGE
'Water Withdrawal|Electricity|Gas'	3	0	0	0	0	0	7	0	35	0	0	0	1		46			4			MESSAGE		MESSAGE
'Water Withdrawal|Electricity|Gas|w/ CCS'	3	0	0	0	0	0	7	0	35	0	0	0	1		46			4			MESSAGE		MESSAGE
'Water Withdrawal|Electricity|Gas|w/o CCS'	3	0	0	0	0	0	7	0	35	0	0	0	1		46			4			MESSAGE		MESSAGE
'Water Withdrawal|Electricity|Geothermal'	3	0	0	0	0	0	0	0	35	0	0	0	0		38			2			MESSAGE		MESSAGE
'Water Withdrawal|Electricity|Hydro'	3	0	0	0	0	0	7	0	35	0	0	0	0		45			3			MESSAGE		MESSAGE
'Water Withdrawal|Electricity|Non-Biomass Renewables'	3	0	0	0	0	0	7	0	35	0	0	0	1		46			4			MESSAGE		MESSAGE
'Water Withdrawal|Electricity|Nuclear'	3	0	0	0	0	0	7	0	35	0	0	0	1		46			4			MESSAGE		MESSAGE
'Water Withdrawal|Electricity|Ocean'	0	0	0	0	0	0	7	0	0	0	0	0	0		7			1			IMAGE		0
'Water Withdrawal|Electricity|Oil'	3	0	0	0	0	0	7	0	35	0	0	0	1		46			4			MESSAGE		MESSAGE
'Water Withdrawal|Electricity|Oil|w/ CCS'	3	0	0	0	0	0	7	0	0	0	0	0	0		10			2			IMAGE		IMAGE
'Water Withdrawal|Electricity|Oil|w/o CCS'	3	0	0	0	0	0	7	0	0	0	0	0	1		11			3			IMAGE		IMAGE
'Water Withdrawal|Electricity|Once Through'	0	0	0	0	0	0	7	0	35	0	0	0	1		43			3			MESSAGE		MESSAGE
'Water Withdrawal|Electricity|Other'	0	0	0	0	0	0	7	0	35	0	0	0	0		42			2			MESSAGE		MESSAGE
'Water Withdrawal|Electricity|Sea Cooling'	0	0	0	0	0	0	7	0	35	0	0	0	1		43			3			MESSAGE		MESSAGE
'Water Withdrawal|Electricity|Solar'	0	0	0	0	0	0	7	0	35	0	0	0	1		43			3			MESSAGE		MESSAGE
'Water Withdrawal|Electricity|Solar|CSP'	0	0	0	0	0	0	7	0	35	0	0	0	1		43			3			MESSAGE		MESSAGE
'Water Withdrawal|Electricity|Solar|PV'	0	0	0	0	0	0	7	0	35	0	0	0	1		43			3			MESSAGE		MESSAGE
'Water Withdrawal|Electricity|Wet Tower'	0	0	0	0	0	0	7	0	35	0	0	0	1		43			3			MESSAGE		MESSAGE
'Water Withdrawal|Electricity|Wind'	3	0	0	0	0	0	7	0	35	0	0	0	0		45			3			MESSAGE		MESSAGE
'Water Withdrawal|Extraction'	0	0	0	0	0	0	0	0	35	0	0	0	0		35			1			MESSAGE		0
'Water Withdrawal|Extraction|Coal'	0	0	0	0	0	0	0	0	35	0	0	0	0		35			1			MESSAGE		0
'Water Withdrawal|Extraction|Gas'	0	0	0	0	0	0	0	0	35	0	0	0	0		35			1			MESSAGE		0
'Water Withdrawal|Extraction|Oil'	0	0	0	0	0	0	0	0	35	0	0	0	0		35			1			MESSAGE		0
'Water Withdrawal|Extraction|Uranium'	0	0	0	0	0	0	0	0	35	0	0	0	0		35			1			MESSAGE		0
'Water Withdrawal|Gases'	0	0	0	0	0	0	0	0	35	0	0	0	0		35			1			MESSAGE		0
'Water Withdrawal|Gases|Biomass'	0	0	0	0	0	0	0	0	35	0	0	0	0		35			1			MESSAGE		0
'Water Withdrawal|Gases|Coal'	0	0	0	0	0	0	0	0	35	0	0	0	0		35			1			MESSAGE		0
'Water Withdrawal|Heat'	0	0	0	0	0	0	0	0	35	0	0	0	0		35			1			MESSAGE		0
'Water Withdrawal|Heat|Biomass'	0	0	0	0	0	0	0	0	35	0	0	0	0		35			1			MESSAGE		0
'Water Withdrawal|Heat|Coal'	0	0	0	0	0	0	0	0	35	0	0	0	0		35			1			MESSAGE		0
'Water Withdrawal|Heat|Gas'	0	0	0	0	0	0	0	0	35	0	0	0	0		35			1			MESSAGE		0
'Water Withdrawal|Heat|Geothermal'	0	0	0	0	0	0	0	0	35	0	0	0	0		35			1			MESSAGE		0
'Water Withdrawal|Heat|Oil'	0	0	0	0	0	0	0	0	35	0	0	0	0		35			1			MESSAGE		0
'Water Withdrawal|Heat|Other'	0	0	0	0	0	0	0	0	35	0	0	0	0		35			1			MESSAGE		0
'Water Withdrawal|Hydrogen'	0	0	0	0	0	0	0	0	35	0	0	0	0		35			1			MESSAGE		0
'Water Withdrawal|Hydrogen|Biomass'	0	0	0	0	0	0	0	0	35	0	0	0	0		35			1			MESSAGE		0
'Water Withdrawal|Hydrogen|Biomass|w/ CCS'	0	0	0	0	0	0	0	0	35	0	0	0	0		35			1			MESSAGE		0
'Water Withdrawal|Hydrogen|Biomass|w/o CCS'	0	0	0	0	0	0	0	0	35	0	0	0	0		35			1			MESSAGE		0
'Water Withdrawal|Hydrogen|Coal'	0	0	0	0	0	0	0	0	35	0	0	0	0		35			1			MESSAGE		0
'Water Withdrawal|Hydrogen|Coal|w/ CCS'	0	0	0	0	0	0	0	0	35	0	0	0	0		35			1			MESSAGE		0
'Water Withdrawal|Hydrogen|Coal|w/o CCS'	0	0	0	0	0	0	0	0	35	0	0	0	0		35			1			MESSAGE		0
'Water Withdrawal|Hydrogen|Electricity'	0	0	0	0	0	0	0	0	35	0	0	0	0		35			1			MESSAGE		0
'Water Withdrawal|Hydrogen|Fossil'	0	0	0	0	0	0	0	0	35	0	0	0	0		35			1			MESSAGE		0
'Water Withdrawal|Hydrogen|Fossil|w/ CCS'	0	0	0	0	0	0	0	0	35	0	0	0	0		35			1			MESSAGE		0
'Water Withdrawal|Hydrogen|Fossil|w/o CCS'	0	0	0	0	0	0	0	0	35	0	0	0	0		35			1			MESSAGE		0
'Water Withdrawal|Hydrogen|Gas'	0	0	0	0	0	0	0	0	35	0	0	0	0		35			1			MESSAGE		0
'Water Withdrawal|Hydrogen|Gas|w/ CCS'	0	0	0	0	0	0	0	0	35	0	0	0	0		35			1			MESSAGE		0
'Water Withdrawal|Hydrogen|Gas|w/o CCS'	0	0	0	0	0	0	0	0	35	0	0	0	0		35			1			MESSAGE		0
'Water Withdrawal|Industrial Water'	3	0	0	0	0	0	7	0	0	0	0	0	0		10			2			IMAGE		IMAGE
'Water Withdrawal|Irrigation'	0	0	0	0	0	0	7	0	36	5	13	0	1		62			5			MESSAGE		MESSAGE
'Water Withdrawal|Liquids'	0	0	0	0	0	0	0	0	35	0	0	0	0		35			1			MESSAGE		0
'Water Withdrawal|Liquids|Biomass'	0	0	0	0	0	0	0	0	35	0	0	0	0		35			1			MESSAGE		0
'Water Withdrawal|Liquids|Biomass|w/ CCS'	0	0	0	0	0	0	0	0	35	0	0	0	0		35			1			MESSAGE		0
'Water Withdrawal|Liquids|Biomass|w/o CCS'	0	0	0	0	0	0	0	0	35	0	0	0	0		35			1			MESSAGE		0
'Water Withdrawal|Liquids|Coal'	0	0	0	0	0	0	0	0	35	0	0	0	0		35			1			MESSAGE		0
'Water Withdrawal|Liquids|Coal|w/ CCS'	0	0	0	0	0	0	0	0	35	0	0	0	0		35			1			MESSAGE		0
'Water Withdrawal|Liquids|Coal|w/o CCS'	0	0	0	0	0	0	0	0	35	0	0	0	0		35			1			MESSAGE		0
'Water Withdrawal|Liquids|Fossil'	0	0	0	0	0	0	0	0	35	0	0	0	0		35			1			MESSAGE		0
'Water Withdrawal|Liquids|Fossil|w/ CCS'	0	0	0	0	0	0	0	0	35	0	0	0	0		35			1			MESSAGE		0
'Water Withdrawal|Liquids|Fossil|w/o CCS'	0	0	0	0	0	0	0	0	35	0	0	0	0		35			1			MESSAGE		0
'Water Withdrawal|Liquids|Gas'	0	0	0	0	0	0	0	0	35	0	0	0	0		35			1			MESSAGE		0
'Water Withdrawal|Liquids|Gas|w/ CCS'	0	0	0	0	0	0	0	0	35	0	0	0	0		35			1			MESSAGE		0
'Water Withdrawal|Liquids|Gas|w/o CCS'	0	0	0	0	0	0	0	0	35	0	0	0	0		35			1			MESSAGE		0
'Water Withdrawal|Liquids|Oil'	0	0	0	0	0	0	0	0	35	0	0	0	0		35			1			MESSAGE		0
'Water Withdrawal|Municipal Water'	3	0	0	0	0	0	7	0	0	0	0	0	0		10			2			IMAGE		IMAGE
'Yield|Bioenergy|2nd generation'	0	0	0	0	0	0	0	0	0	0	1	0	0		1			1			REMIND		0
'Yield|Cereal'	3	0	0	0	0	0	7	0	35	0	28	0	0		73			4			MESSAGE		MESSAGE
'Yield|Oilcrops'	0	0	0	0	0	0	0	0	35	0	28	0	0		63			2			MESSAGE		MESSAGE
'Yield|Sugarcrops'	3	0	0	0	0	0	0	0	35	0	28	0	0		66			3			MESSAGE		MESSAGE
														Total
Total variables reported	623	117	310	0	478	338	872	0	899	600	796	0	585
Scenarios per model	3	2	4	0	6	10	9	0	43	10	44	0	2	133
Dominant model count	4	2	1	0	5	24	228	0	642	12	371	0	10	1299
Dominant model count (>1 model)	2	0	1	0	4	12	116	0	499	3	341	0	0	978

## Sheet: C3
	AIM	C-ROADS	COFFEE	EPPA	GCAM	GEM-E3	IMAGE	MERGE-ETL	MESSAGE	POLES	REMIND	TIAM	WITCH		Total number of scenarios			Number of models that report variable			Dominant Model		Dominant Model (>1 model)
'AR6 climate diagnostics|Effective Radiative Forcing|Basket|Greenhouse Gases|CICERO-SCM|50.0th Percentile'	17	0	14	1	13	12	34	0	57	26	80	20	31		305			11			REMIND		REMIND
'AR6 climate diagnostics|Effective Radiative Forcing|Basket|Greenhouse Gases|FaIRv1.6.2|50.0th Percentile'	17	0	14	1	13	12	34	0	57	26	80	20	31		305			11			REMIND		REMIND
'AR6 climate diagnostics|Effective Radiative Forcing|Basket|Non-CO2 Greenhouse Gases|CICERO-SCM|50.0th Percentile'	17	0	14	1	13	12	34	0	57	26	80	20	31		305			11			REMIND		REMIND
'AR6 climate diagnostics|Effective Radiative Forcing|Basket|Non-CO2 Greenhouse Gases|FaIRv1.6.2|50.0th Percentile'	17	0	14	1	13	12	34	0	57	26	80	20	31		305			11			REMIND		REMIND
'AR6 climate diagnostics|Effective Radiative Forcing|CH4|CICERO-SCM|50.0th Percentile'	17	0	14	1	13	12	34	0	57	26	80	20	31		305			11			REMIND		REMIND
'AR6 climate diagnostics|Effective Radiative Forcing|CH4|FaIRv1.6.2|50.0th Percentile'	17	0	14	1	13	12	34	0	57	26	80	20	31		305			11			REMIND		REMIND
'AR6 climate diagnostics|Effective Radiative Forcing|CICERO-SCM|33.0th Percentile'	17	0	14	1	13	12	34	0	57	26	80	20	31		305			11			REMIND		REMIND
'AR6 climate diagnostics|Effective Radiative Forcing|CICERO-SCM|5.0th Percentile'	17	0	14	1	13	12	34	0	57	26	80	20	31		305			11			REMIND		REMIND
'AR6 climate diagnostics|Effective Radiative Forcing|CICERO-SCM|50.0th Percentile'	17	0	14	1	13	12	34	0	57	26	80	20	31		305			11			REMIND		REMIND
'AR6 climate diagnostics|Effective Radiative Forcing|CICERO-SCM|67.0th Percentile'	17	0	14	1	13	12	34	0	57	26	80	20	31		305			11			REMIND		REMIND
'AR6 climate diagnostics|Effective Radiative Forcing|CICERO-SCM|95.0th Percentile'	17	0	14	1	13	12	34	0	57	26	80	20	31		305			11			REMIND		REMIND
'AR6 climate diagnostics|Effective Radiative Forcing|CO2|CICERO-SCM|50.0th Percentile'	17	0	14	1	13	12	34	0	57	26	80	20	31		305			11			REMIND		REMIND
'AR6 climate diagnostics|Effective Radiative Forcing|CO2|FaIRv1.6.2|50.0th Percentile'	17	0	14	1	13	12	34	0	57	26	80	20	31		305			11			REMIND		REMIND
'AR6 climate diagnostics|Effective Radiative Forcing|FaIRv1.6.2|33.0th Percentile'	17	0	14	1	13	12	34	0	57	26	80	20	31		305			11			REMIND		REMIND
'AR6 climate diagnostics|Effective Radiative Forcing|FaIRv1.6.2|5.0th Percentile'	17	0	14	1	13	12	34	0	57	26	80	20	31		305			11			REMIND		REMIND
'AR6 climate diagnostics|Effective Radiative Forcing|FaIRv1.6.2|50.0th Percentile'	17	0	14	1	13	12	34	0	57	26	80	20	31		305			11			REMIND		REMIND
'AR6 climate diagnostics|Effective Radiative Forcing|FaIRv1.6.2|67.0th Percentile'	17	0	14	1	13	12	34	0	57	26	80	20	31		305			11			REMIND		REMIND
'AR6 climate diagnostics|Effective Radiative Forcing|FaIRv1.6.2|95.0th Percentile'	17	0	14	1	13	12	34	0	57	26	80	20	31		305			11			REMIND		REMIND
'AR6 climate diagnostics|Effective Radiative Forcing|MAGICCv7.5.3|33.0th Percentile'	17	0	14	1	13	12	34	0	59	26	84	20	31		311			11			REMIND		REMIND
'AR6 climate diagnostics|Effective Radiative Forcing|MAGICCv7.5.3|5.0th Percentile'	17	0	14	1	13	12	34	0	59	26	84	20	31		311			11			REMIND		REMIND
'AR6 climate diagnostics|Effective Radiative Forcing|MAGICCv7.5.3|50.0th Percentile'	17	0	14	1	13	12	34	0	59	26	84	20	31		311			11			REMIND		REMIND
'AR6 climate diagnostics|Effective Radiative Forcing|MAGICCv7.5.3|67.0th Percentile'	17	0	14	1	13	12	34	0	59	26	84	20	31		311			11			REMIND		REMIND
'AR6 climate diagnostics|Effective Radiative Forcing|MAGICCv7.5.3|95.0th Percentile'	17	0	14	1	13	12	34	0	59	26	84	20	31		311			11			REMIND		REMIND
'AR6 climate diagnostics|Emissions|Kyoto Gases (AR5-GWP100)'	17	0	14	1	13	12	34	0	59	26	84	20	31		311			11			REMIND		REMIND
'AR6 climate diagnostics|Emissions|Kyoto Gases (AR6-GWP100)'	17	0	14	1	13	12	34	0	59	26	84	20	31		311			11			REMIND		REMIND
'AR6 climate diagnostics|Exceedance Probability 1.5C|CICERO-SCM'	17	0	14	1	13	12	34	0	57	26	80	20	31		305			11			REMIND		REMIND
'AR6 climate diagnostics|Exceedance Probability 1.5C|FaIRv1.6.2'	17	0	14	1	13	12	34	0	57	26	80	20	31		305			11			REMIND		REMIND
'AR6 climate diagnostics|Exceedance Probability 1.5C|MAGICCv7.5.3'	17	0	14	1	13	12	34	0	59	26	84	20	31		311			11			REMIND		REMIND
'AR6 climate diagnostics|Exceedance Probability 2.0C|CICERO-SCM'	17	0	14	1	13	12	34	0	57	26	80	20	31		305			11			REMIND		REMIND
'AR6 climate diagnostics|Exceedance Probability 2.0C|FaIRv1.6.2'	17	0	14	1	13	12	34	0	57	26	80	20	31		305			11			REMIND		REMIND
'AR6 climate diagnostics|Exceedance Probability 2.0C|MAGICCv7.5.3'	17	0	14	1	13	12	34	0	59	26	84	20	31		311			11			REMIND		REMIND
'AR6 climate diagnostics|Exceedance Probability 2.5C|CICERO-SCM'	17	0	14	1	13	12	34	0	57	26	80	20	31		305			11			REMIND		REMIND
'AR6 climate diagnostics|Exceedance Probability 2.5C|FaIRv1.6.2'	17	0	14	1	13	12	34	0	57	26	80	20	31		305			11			REMIND		REMIND
'AR6 climate diagnostics|Exceedance Probability 2.5C|MAGICCv7.5.3'	17	0	14	1	13	12	34	0	59	26	84	20	31		311			11			REMIND		REMIND
'AR6 climate diagnostics|Exceedance Probability 3.0C|CICERO-SCM'	17	0	14	1	13	12	34	0	57	26	80	20	31		305			11			REMIND		REMIND
'AR6 climate diagnostics|Exceedance Probability 3.0C|FaIRv1.6.2'	17	0	14	1	13	12	34	0	57	26	80	20	31		305			11			REMIND		REMIND
'AR6 climate diagnostics|Exceedance Probability 3.0C|MAGICCv7.5.3'	17	0	14	1	13	12	34	0	59	26	84	20	31		311			11			REMIND		REMIND
'AR6 climate diagnostics|Infilled|Emissions|CH4'	17	0	14	1	13	12	34	0	59	26	84	20	31		311			11			REMIND		REMIND
'AR6 climate diagnostics|Infilled|Emissions|CO2'	17	0	14	1	13	12	34	0	59	26	84	20	31		311			11			REMIND		REMIND
'AR6 climate diagnostics|Infilled|Emissions|F-Gases'	17	0	0	1	13	12	34	0	51	26	84	0	31		269			9			REMIND		REMIND
'AR6 climate diagnostics|Infilled|Emissions|Kyoto Gases (AR5-GWP100)'	17	0	14	1	13	12	34	0	59	26	84	20	31		311			11			REMIND		REMIND
'AR6 climate diagnostics|Infilled|Emissions|Kyoto Gases (AR6-GWP100)'	17	0	14	1	13	12	34	0	59	26	84	20	31		311			11			REMIND		REMIND
'AR6 climate diagnostics|Infilled|Emissions|N2O'	17	0	14	1	13	12	34	0	59	26	84	20	31		311			11			REMIND		REMIND
'AR6 climate diagnostics|Native-with-Infilled|Emissions|Kyoto Gases (AR5-GWP100)'	17	0	14	1	13	12	34	0	59	26	84	20	31		311			11			REMIND		REMIND
'AR6 climate diagnostics|Native-with-Infilled|Emissions|Kyoto Gases (AR6-GWP100)'	17	0	14	1	13	12	34	0	59	26	84	20	31		311			11			REMIND		REMIND
'AR6 climate diagnostics|Surface Temperature (GSAT)|CICERO-SCM|10.0th Percentile'	17	0	14	1	13	12	34	0	57	26	80	20	31		305			11			REMIND		REMIND
'AR6 climate diagnostics|Surface Temperature (GSAT)|CICERO-SCM|16.7th Percentile'	17	0	14	1	13	12	34	0	57	26	80	20	31		305			11			REMIND		REMIND
'AR6 climate diagnostics|Surface Temperature (GSAT)|CICERO-SCM|33.0th Percentile'	17	0	14	1	13	12	34	0	57	26	80	20	31		305			11			REMIND		REMIND
'AR6 climate diagnostics|Surface Temperature (GSAT)|CICERO-SCM|5.0th Percentile'	17	0	14	1	13	12	34	0	57	26	80	20	31		305			11			REMIND		REMIND
'AR6 climate diagnostics|Surface Temperature (GSAT)|CICERO-SCM|50.0th Percentile'	17	0	14	1	13	12	34	0	57	26	80	20	31		305			11			REMIND		REMIND
'AR6 climate diagnostics|Surface Temperature (GSAT)|CICERO-SCM|67.0th Percentile'	17	0	14	1	13	12	34	0	57	26	80	20	31		305			11			REMIND		REMIND
'AR6 climate diagnostics|Surface Temperature (GSAT)|CICERO-SCM|83.3th Percentile'	17	0	14	1	13	12	34	0	57	26	80	20	31		305			11			REMIND		REMIND
'AR6 climate diagnostics|Surface Temperature (GSAT)|CICERO-SCM|90.0th Percentile'	17	0	14	1	13	12	34	0	57	26	80	20	31		305			11			REMIND		REMIND
'AR6 climate diagnostics|Surface Temperature (GSAT)|CICERO-SCM|95.0th Percentile'	17	0	14	1	13	12	34	0	57	26	80	20	31		305			11			REMIND		REMIND
'AR6 climate diagnostics|Surface Temperature (GSAT)|FaIRv1.6.2|10.0th Percentile'	17	0	14	1	13	12	34	0	57	26	80	20	31		305			11			REMIND		REMIND
'AR6 climate diagnostics|Surface Temperature (GSAT)|FaIRv1.6.2|16.7th Percentile'	17	0	14	1	13	12	34	0	57	26	80	20	31		305			11			REMIND		REMIND
'AR6 climate diagnostics|Surface Temperature (GSAT)|FaIRv1.6.2|33.0th Percentile'	17	0	14	1	13	12	34	0	57	26	80	20	31		305			11			REMIND		REMIND
'AR6 climate diagnostics|Surface Temperature (GSAT)|FaIRv1.6.2|5.0th Percentile'	17	0	14	1	13	12	34	0	57	26	80	20	31		305			11			REMIND		REMIND
'AR6 climate diagnostics|Surface Temperature (GSAT)|FaIRv1.6.2|50.0th Percentile'	17	0	14	1	13	12	34	0	57	26	80	20	31		305			11			REMIND		REMIND
'AR6 climate diagnostics|Surface Temperature (GSAT)|FaIRv1.6.2|67.0th Percentile'	17	0	14	1	13	12	34	0	57	26	80	20	31		305			11			REMIND		REMIND
'AR6 climate diagnostics|Surface Temperature (GSAT)|FaIRv1.6.2|83.3th Percentile'	17	0	14	1	13	12	34	0	57	26	80	20	31		305			11			REMIND		REMIND
'AR6 climate diagnostics|Surface Temperature (GSAT)|FaIRv1.6.2|90.0th Percentile'	17	0	14	1	13	12	34	0	57	26	80	20	31		305			11			REMIND		REMIND
'AR6 climate diagnostics|Surface Temperature (GSAT)|FaIRv1.6.2|95.0th Percentile'	17	0	14	1	13	12	34	0	57	26	80	20	31		305			11			REMIND		REMIND
'AR6 climate diagnostics|Surface Temperature (GSAT)|MAGICCv7.5.3|10.0th Percentile'	17	0	14	1	13	12	34	0	59	26	84	20	31		311			11			REMIND		REMIND
'AR6 climate diagnostics|Surface Temperature (GSAT)|MAGICCv7.5.3|16.7th Percentile'	17	0	14	1	13	12	34	0	59	26	84	20	31		311			11			REMIND		REMIND
'AR6 climate diagnostics|Surface Temperature (GSAT)|MAGICCv7.5.3|33.0th Percentile'	17	0	14	1	13	12	34	0	59	26	84	20	31		311			11			REMIND		REMIND
'AR6 climate diagnostics|Surface Temperature (GSAT)|MAGICCv7.5.3|5.0th Percentile'	17	0	14	1	13	12	34	0	59	26	84	20	31		311			11			REMIND		REMIND
'AR6 climate diagnostics|Surface Temperature (GSAT)|MAGICCv7.5.3|50.0th Percentile'	17	0	14	1	13	12	34	0	59	26	84	20	31		311			11			REMIND		REMIND
'AR6 climate diagnostics|Surface Temperature (GSAT)|MAGICCv7.5.3|67.0th Percentile'	17	0	14	1	13	12	34	0	59	26	84	20	31		311			11			REMIND		REMIND
'AR6 climate diagnostics|Surface Temperature (GSAT)|MAGICCv7.5.3|83.3th Percentile'	17	0	14	1	13	12	34	0	59	26	84	20	31		311			11			REMIND		REMIND
'AR6 climate diagnostics|Surface Temperature (GSAT)|MAGICCv7.5.3|90.0th Percentile'	17	0	14	1	13	12	34	0	59	26	84	20	31		311			11			REMIND		REMIND
'AR6 climate diagnostics|Surface Temperature (GSAT)|MAGICCv7.5.3|95.0th Percentile'	17	0	14	1	13	12	34	0	59	26	84	20	31		311			11			REMIND		REMIND
'Agricultural Demand'	14	0	0	0	13	0	23	0	51	0	43	0	29		173			6			MESSAGE		MESSAGE
'Agricultural Demand|Crops'	3	0	0	0	1	0	21	0	46	0	36	0	28		135			6			MESSAGE		MESSAGE
'Agricultural Demand|Crops|Energy'	1	0	0	0	13	0	18	0	45	0	38	0	28		143			6			MESSAGE		MESSAGE
'Agricultural Demand|Crops|Energy|1st generation'	1	0	0	0	1	0	18	0	45	0	38	0	28		131			6			MESSAGE		MESSAGE
'Agricultural Demand|Crops|Energy|2nd generation'	1	0	0	0	1	0	18	0	45	0	38	0	28		131			6			MESSAGE		MESSAGE
'Agricultural Demand|Crops|Feed'	2	0	0	0	13	0	18	0	45	0	38	0	28		144			6			MESSAGE		MESSAGE
'Agricultural Demand|Crops|Food'	2	0	0	0	1	0	18	0	45	0	38	0	28		132			6			MESSAGE		MESSAGE
'Agricultural Demand|Crops|Other'	2	0	0	0	13	0	18	0	45	0	38	0	28		144			6			MESSAGE		MESSAGE
'Agricultural Demand|Livestock'	3	0	0	0	13	0	21	0	46	0	36	0	28		147			6			MESSAGE		MESSAGE
'Agricultural Demand|Livestock|Food'	2	0	0	0	1	0	18	0	45	0	38	0	28		132			6			MESSAGE		MESSAGE
'Agricultural Demand|Livestock|Other'	2	0	0	0	13	0	18	0	45	0	38	0	28		144			6			MESSAGE		MESSAGE
'Agricultural Production'	14	0	0	0	0	0	23	0	51	0	43	0	29		160			5			MESSAGE		MESSAGE
'Agricultural Production|Energy'	14	0	0	0	0	0	10	0	48	0	38	0	29		139			5			MESSAGE		MESSAGE
'Agricultural Production|Energy|Crops'	16	0	0	0	0	0	21	0	49	0	39	0	29		154			5			MESSAGE		MESSAGE
'Agricultural Production|Energy|Residues'	0	0	0	0	0	0	18	0	0	0	38	0	0		56			2			REMIND		REMIND
'Agricultural Production|Non-Energy'	14	0	0	0	0	0	18	0	48	18	38	0	29		165			6			MESSAGE		MESSAGE
'Agricultural Production|Non-Energy|Crops'	16	0	0	0	0	0	12	0	49	18	39	0	29		163			6			MESSAGE		MESSAGE
'Agricultural Production|Non-Energy|Livestock'	16	0	0	0	0	0	21	0	49	18	39	0	29		172			6			MESSAGE		MESSAGE
'Capacity Additions|Electricity|Biomass'	14	0	0	0	1	12	18	0	46	18	70	0	29		208			8			REMIND		REMIND
'Capacity Additions|Electricity|Biomass|w/ CCS'	14	0	0	0	1	12	18	0	46	18	70	20	29		228			9			REMIND		REMIND
'Capacity Additions|Electricity|Biomass|w/o CCS'	14	0	0	0	1	12	18	0	46	18	70	20	29		228			9			REMIND		REMIND
'Capacity Additions|Electricity|Coal'	14	0	0	0	1	12	18	0	46	18	70	0	29		208			8			REMIND		REMIND
'Capacity Additions|Electricity|Coal|w/ CCS'	13	0	0	0	1	12	18	0	46	18	70	20	29		227			9			REMIND		REMIND
'Capacity Additions|Electricity|Coal|w/o CCS'	14	0	0	0	1	12	18	0	46	18	70	20	29		228			9			REMIND		REMIND
'Capacity Additions|Electricity|Fossil'	14	0	0	0	1	12	18	0	46	18	70	0	29		208			8			REMIND		REMIND
'Capacity Additions|Electricity|Gas'	14	0	0	0	1	12	18	0	46	18	70	0	29		208			8			REMIND		REMIND
'Capacity Additions|Electricity|Gas|w/ CCS'	14	0	0	0	1	12	18	0	46	18	70	20	29		228			9			REMIND		REMIND
'Capacity Additions|Electricity|Gas|w/o CCS'	14	0	0	0	1	12	18	0	46	18	70	20	29		228			9			REMIND		REMIND
'Capacity Additions|Electricity|Geothermal'	14	0	0	0	1	12	0	0	46	18	0	20	0		111			6			MESSAGE		MESSAGE
'Capacity Additions|Electricity|Hydro'	14	0	0	0	0	12	18	0	46	18	70	20	29		227			8			REMIND		REMIND
'Capacity Additions|Electricity|Non-Biomass Renewables'	14	0	0	0	1	12	18	0	46	18	70	20	29		228			9			REMIND		REMIND
'Capacity Additions|Electricity|Nuclear'	14	0	0	0	1	12	18	0	46	18	70	20	29		228			9			REMIND		REMIND
'Capacity Additions|Electricity|Oil'	14	0	0	0	1	12	18	0	46	18	0	0	29		138			7			MESSAGE		MESSAGE
'Capacity Additions|Electricity|Oil|w/ CCS'	14	0	0	0	0	0	18	0	46	18	0	0	0		96			4			MESSAGE		MESSAGE
'Capacity Additions|Electricity|Oil|w/o CCS'	14	0	0	0	1	12	18	0	46	18	0	0	29		138			7			MESSAGE		MESSAGE
'Capacity Additions|Electricity|Renewables (incl. Biomass)'	14	0	0	0	1	12	18	0	46	18	70	20	29		228			9			REMIND		REMIND
'Capacity Additions|Electricity|Solar'	14	0	0	0	1	12	18	0	46	18	70	0	29		208			8			REMIND		REMIND
'Capacity Additions|Electricity|Solar|CSP'	0	0	0	0	1	0	18	0	46	18	70	20	29		202			7			REMIND		REMIND
'Capacity Additions|Electricity|Solar|PV'	14	0	0	0	1	12	18	0	46	18	70	20	29		228			9			REMIND		REMIND
'Capacity Additions|Electricity|Storage Capacity'	0	0	0	0	0	0	0	0	43	0	70	0	29		142			3			REMIND		REMIND
'Capacity Additions|Electricity|Wind'	14	0	0	0	1	12	18	0	46	18	70	20	29		228			9			REMIND		REMIND
'Capacity Additions|Electricity|Wind|Offshore'	0	0	0	0	1	12	18	0	46	18	0	20	29		144			7			MESSAGE		MESSAGE
'Capacity Additions|Electricity|Wind|Onshore'	14	0	0	0	1	12	18	0	46	18	0	20	29		158			8			MESSAGE		MESSAGE
'Capacity|Electricity'	17	0	0	0	1	12	23	0	54	18	72	20	31		248			9			REMIND		REMIND
'Capacity|Electricity|Biomass'	17	0	14	0	1	12	25	0	51	20	71	0	31		242			9			REMIND		REMIND
'Capacity|Electricity|Biomass|w/ CCS'	14	0	14	0	1	12	18	0	48	18	70	20	29		244			10			REMIND		REMIND
'Capacity|Electricity|Biomass|w/o CCS'	14	0	14	0	1	12	18	0	48	18	70	20	29		244			10			REMIND		REMIND
'Capacity|Electricity|Coal'	17	0	14	0	1	12	25	0	56	20	71	0	31		247			9			REMIND		REMIND
'Capacity|Electricity|Coal|w/ CCS'	14	0	14	0	1	12	18	0	48	18	70	20	29		244			10			REMIND		REMIND
'Capacity|Electricity|Coal|w/o CCS'	14	0	14	0	1	12	18	0	48	18	70	20	29		244			10			REMIND		REMIND
'Capacity|Electricity|Fossil'	17	0	14	0	1	12	25	0	56	20	71	0	31		247			9			REMIND		REMIND
'Capacity|Electricity|Gas'	17	0	14	0	1	12	25	0	51	20	71	0	31		242			9			REMIND		REMIND
'Capacity|Electricity|Gas|w/ CCS'	14	0	14	0	1	12	18	0	48	18	70	20	29		244			10			REMIND		REMIND
'Capacity|Electricity|Gas|w/o CCS'	14	0	14	0	1	12	18	0	48	18	70	20	29		244			10			REMIND		REMIND
'Capacity|Electricity|Geothermal'	17	0	14	0	1	12	0	0	51	20	71	0	0		186			7			REMIND		REMIND
'Capacity|Electricity|Hydro'	17	0	14	0	1	12	25	0	51	20	72	20	31		263			10			REMIND		REMIND
'Capacity|Electricity|Non-Biomass Renewables'	17	0	14	0	1	12	25	0	51	20	72	20	31		263			10			REMIND		REMIND
'Capacity|Electricity|Nuclear'	17	0	14	0	1	12	25	0	51	20	72	20	31		263			10			REMIND		REMIND
'Capacity|Electricity|Ocean'	0	0	0	0	0	0	0	0	0	2	0	0	0		2			1			POLES		0
'Capacity|Electricity|Oil'	17	0	14	0	1	12	25	0	51	20	35	0	31		206			9			MESSAGE		MESSAGE
'Capacity|Electricity|Oil|w/ CCS'	14	0	0	0	0	0	18	0	48	18	0	20	0		118			5			MESSAGE		MESSAGE
'Capacity|Electricity|Oil|w/o CCS'	14	0	0	0	1	12	18	0	48	18	70	20	29		230			9			REMIND		REMIND
'Capacity|Electricity|Other'	14	0	0	0	0	0	23	0	0	20	35	0	0		92			4			REMIND		REMIND
'Capacity|Electricity|Peak Demand'	0	0	0	0	0	0	18	0	0	18	70	0	0		106			3			REMIND		REMIND
'Capacity|Electricity|Renewables (incl. Biomass)'	17	0	14	0	1	12	25	0	51	20	72	20	31		263			10			REMIND		REMIND
'Capacity|Electricity|Solar'	16	0	14	0	1	12	25	0	51	20	71	0	31		241			9			REMIND		REMIND
'Capacity|Electricity|Solar|CSP'	0	0	14	0	1	0	22	0	50	20	71	20	31		229			8			REMIND		REMIND
'Capacity|Electricity|Solar|PV'	15	0	14	0	1	12	22	0	50	20	71	20	31		256			10			REMIND		REMIND
'Capacity|Electricity|Storage'	12	0	0	0	0	0	18	0	45	0	70	0	29		174			5			REMIND		REMIND
'Capacity|Electricity|Storage Capacity'	12	0	0	0	0	0	18	0	0	0	0	0	29		59			3			WITCH		WITCH
'Capacity|Electricity|Wind'	17	0	14	0	1	12	25	0	51	20	72	20	31		263			10			REMIND		REMIND
'Capacity|Electricity|Wind|Offshore'	0	0	14	0	1	12	22	0	50	20	0	20	31		170			8			MESSAGE		MESSAGE
'Capacity|Electricity|Wind|Onshore'	15	0	14	0	1	12	22	0	50	20	0	20	31		185			9			MESSAGE		MESSAGE
'Capacity|Gases|Biomass'	0	0	0	0	0	0	0	0	48	0	0	0	0		48			1			MESSAGE		0
'Capacity|Gases|Biomass|w/o CCS'	0	0	0	0	0	0	0	0	48	0	0	0	0		48			1			MESSAGE		0
'Capacity|Gases|Coal'	0	0	0	0	0	0	0	0	48	0	0	0	0		48			1			MESSAGE		0
'Capacity|Gases|Coal|w/o CCS'	0	0	0	0	0	0	0	0	48	0	0	0	0		48			1			MESSAGE		0
'Capacity|Hydrogen|Biomass'	0	0	0	0	0	0	18	0	48	0	0	0	0		66			2			MESSAGE		MESSAGE
'Capacity|Hydrogen|Biomass|w/ CCS'	0	0	0	0	0	0	18	0	48	0	0	0	0		66			2			MESSAGE		MESSAGE
'Capacity|Hydrogen|Biomass|w/o CCS'	0	0	0	0	0	0	18	0	48	0	0	0	0		66			2			MESSAGE		MESSAGE
'Capacity|Hydrogen|Coal'	0	0	0	0	0	0	18	0	48	0	0	0	0		66			2			MESSAGE		MESSAGE
'Capacity|Hydrogen|Coal|w/ CCS'	0	0	0	0	0	0	18	0	48	0	0	0	0		66			2			MESSAGE		MESSAGE
'Capacity|Hydrogen|Coal|w/o CCS'	0	0	0	0	0	0	18	0	48	0	0	0	0		66			2			MESSAGE		MESSAGE
'Capacity|Hydrogen|Electricity'	0	0	0	0	0	0	18	0	47	0	0	0	27		92			3			MESSAGE		MESSAGE
'Capacity|Hydrogen|Gas'	0	0	0	0	0	0	18	0	48	0	0	0	27		93			3			MESSAGE		MESSAGE
'Capacity|Hydrogen|Gas|w/ CCS'	0	0	0	0	0	0	18	0	48	0	0	0	27		93			3			MESSAGE		MESSAGE
'Capacity|Hydrogen|Gas|w/o CCS'	0	0	0	0	0	0	18	0	48	0	0	0	27		93			3			MESSAGE		MESSAGE
'Capacity|Liquids|Biomass'	0	0	0	0	0	0	0	0	48	0	0	0	0		48			1			MESSAGE		0
'Capacity|Liquids|Biomass|w/ CCS'	14	0	0	0	0	0	0	0	48	0	0	0	0		62			2			MESSAGE		MESSAGE
'Capacity|Liquids|Biomass|w/o CCS'	14	0	0	0	0	0	0	0	48	0	0	0	0		62			2			MESSAGE		MESSAGE
'Capacity|Liquids|Coal'	0	0	0	0	0	0	0	0	48	0	0	0	0		48			1			MESSAGE		0
'Capacity|Liquids|Coal|w/ CCS'	0	0	0	0	0	0	0	0	48	0	0	0	0		48			1			MESSAGE		0
'Capacity|Liquids|Coal|w/o CCS'	0	0	0	0	0	0	0	0	48	0	0	0	0		48			1			MESSAGE		0
'Capacity|Liquids|Gas'	0	0	0	0	0	0	0	0	48	0	0	0	0		48			1			MESSAGE		0
'Capacity|Liquids|Gas|w/ CCS'	0	0	0	0	0	0	0	0	48	0	0	0	0		48			1			MESSAGE		0
'Capacity|Liquids|Gas|w/o CCS'	0	0	0	0	0	0	0	0	48	0	0	0	0		48			1			MESSAGE		0
'Capacity|Liquids|Oil'	14	0	0	0	0	0	0	0	48	0	0	0	0		62			2			MESSAGE		MESSAGE
'Capacity|Transportation|Aviation|Freight'	0	0	0	0	0	0	0	0	0	0	0	0	0		0			0			0		0
'Capacity|Transportation|Aviation|Passenger'	0	0	0	0	0	0	0	0	0	0	0	0	0		0			0			0		0
'Capacity|Transportation|Maritime|Freight'	0	0	0	0	0	0	0	0	0	0	0	0	0		0			0			0		0
'Capacity|Transportation|Maritime|Passenger'	0	0	0	0	0	0	0	0	0	0	0	0	0		0			0			0		0
'Capacity|Transportation|Rail|Freight'	0	0	0	0	0	0	0	0	0	0	0	0	0		0			0			0		0
'Capacity|Transportation|Rail|Passenger'	0	0	0	0	0	0	0	0	0	0	0	0	0		0			0			0		0
'Capacity|Transportation|Road|Freight'	0	0	0	0	0	0	0	0	0	0	0	0	0		0			0			0		0
'Capacity|Transportation|Road|Passenger'	0	0	0	0	0	0	0	0	0	0	0	0	0		0			0			0		0
'Capital Cost|Electricity|Biomass|w/ CCS'	14	0	0	0	1	12	3	0	2	18	70	20	29		169			9			REMIND		REMIND
'Capital Cost|Electricity|Biomass|w/o CCS'	14	0	0	0	1	12	0	0	2	18	70	20	29		166			8			REMIND		REMIND
'Capital Cost|Electricity|Coal|w/ CCS'	14	0	0	0	1	12	3	0	2	18	70	20	29		169			9			REMIND		REMIND
'Capital Cost|Electricity|Coal|w/o CCS'	14	0	0	0	1	12	0	0	2	18	70	20	29		166			8			REMIND		REMIND
'Capital Cost|Electricity|Gas|w/ CCS'	14	0	0	0	1	12	3	0	2	18	70	20	29		169			9			REMIND		REMIND
'Capital Cost|Electricity|Gas|w/o CCS'	14	0	0	0	1	12	0	0	2	18	70	20	29		166			8			REMIND		REMIND
'Capital Cost|Electricity|Geothermal'	14	0	0	0	1	12	0	0	47	18	70	20	0		182			7			REMIND		REMIND
'Capital Cost|Electricity|Hydro'	14	0	0	0	0	12	3	0	47	18	70	20	0		184			7			REMIND		REMIND
'Capital Cost|Electricity|Nuclear'	14	0	0	0	1	12	3	0	47	18	70	20	29		214			9			REMIND		REMIND
'Capital Cost|Electricity|Solar|CSP'	0	0	0	0	1	0	3	0	2	18	70	20	29		143			7			REMIND		REMIND
'Capital Cost|Electricity|Solar|PV'	14	0	0	0	1	12	3	0	47	18	70	20	29		214			9			REMIND		REMIND
'Capital Cost|Electricity|Wind|Offshore'	0	0	0	0	1	12	3	0	47	18	70	20	29		200			8			REMIND		REMIND
'Capital Cost|Electricity|Wind|Onshore'	14	0	0	0	1	12	3	0	47	18	0	20	29		144			8			MESSAGE		MESSAGE
'Capital Cost|Gases|Biomass|w/ CCS'	0	0	0	0	0	0	0	0	0	0	0	20	0		20			1			TIAM		0
'Capital Cost|Gases|Biomass|w/o CCS'	0	0	0	0	0	0	0	0	47	0	70	0	0		117			2			REMIND		REMIND
'Capital Cost|Gases|Coal|w/ CCS'	0	0	0	0	0	0	0	0	0	0	0	20	0		20			1			TIAM		0
'Capital Cost|Gases|Coal|w/o CCS'	0	0	0	0	0	0	0	0	47	0	70	0	0		117			2			REMIND		REMIND
'Capital Cost|Hydrogen|Biomass|w/ CCS'	0	0	0	0	0	0	3	0	47	16	70	0	0		136			4			REMIND		REMIND
'Capital Cost|Hydrogen|Biomass|w/o CCS'	0	0	0	0	0	0	3	0	47	16	70	20	0		156			5			REMIND		REMIND
'Capital Cost|Hydrogen|Coal|w/ CCS'	0	0	0	0	0	0	3	0	47	16	70	20	0		156			5			REMIND		REMIND
'Capital Cost|Hydrogen|Coal|w/o CCS'	0	0	0	0	0	0	3	0	47	16	70	20	0		156			5			REMIND		REMIND
'Capital Cost|Hydrogen|Electricity'	0	0	0	0	0	0	3	0	47	18	70	20	0		158			5			REMIND		REMIND
'Capital Cost|Hydrogen|Gas|w/ CCS'	0	0	0	0	0	0	3	0	47	16	70	0	0		136			4			REMIND		REMIND
'Capital Cost|Hydrogen|Gas|w/o CCS'	0	0	0	0	0	0	0	0	47	16	70	20	0		153			4			REMIND		REMIND
'Capital Cost|Liquids|Biomass|w/ CCS'	14	0	0	0	0	0	0	0	47	16	70	20	0		167			5			REMIND		REMIND
'Capital Cost|Liquids|Biomass|w/o CCS'	14	0	0	0	0	0	0	0	47	16	70	20	0		167			5			REMIND		REMIND
'Capital Cost|Liquids|Coal|w/ CCS'	0	0	0	0	0	0	0	0	47	16	70	20	0		153			4			REMIND		REMIND
'Capital Cost|Liquids|Coal|w/o CCS'	0	0	0	0	0	0	0	0	47	16	70	20	0		153			4			REMIND		REMIND
'Capital Cost|Liquids|Gas|w/ CCS'	0	0	0	0	0	0	0	0	47	16	0	0	0		63			2			MESSAGE		MESSAGE
'Capital Cost|Liquids|Gas|w/o CCS'	0	0	0	0	0	0	0	0	47	16	0	20	0		83			3			MESSAGE		MESSAGE
'Capital Cost|Liquids|Oil'	14	0	0	0	0	0	0	0	0	0	70	0	0		84			2			REMIND		REMIND
'Capital Formation'	0	0	0	0	0	0	0	0	0	0	66	0	0		66			1			REMIND		0
'Capital Stock'	12	0	0	0	0	0	0	0	0	0	0	0	29		41			2			WITCH		WITCH
'Carbon Intensity|Production|Cement'	0	0	0	0	0	0	0	0	0	0	3	0	0		3			1			REMIND		0
'Carbon Intensity|Production|Cement|Fossil|Energy|Demand|Industry'	0	0	0	0	0	0	0	0	0	0	0	0	0		0			0			0		0
'Carbon Intensity|Production|Cement|Industrial Processes'	0	0	0	0	0	0	0	0	0	0	7	0	0		7			1			REMIND		0
'Carbon Intensity|Production|Chemicals'	0	0	0	0	0	0	0	0	0	0	0	0	0		0			0			0		0
'Carbon Intensity|Production|Chemicals|Fossil|Energy|Demand|Industry'	0	0	0	0	0	0	0	0	0	0	0	0	0		0			0			0		0
'Carbon Intensity|Production|Chemicals|Industrial Processes'	0	0	0	0	0	0	0	0	0	0	0	0	0		0			0			0		0
'Carbon Intensity|Production|Steel'	0	0	0	0	0	0	0	0	0	0	7	0	0		7			1			REMIND		0
'Carbon Intensity|Production|Steel|Fossil|Energy|Demand|Industry'	0	0	0	0	0	0	0	0	0	0	4	0	0		4			1			REMIND		0
'Carbon Intensity|Production|Steel|Industrial Processes'	0	0	0	0	0	0	0	0	0	0	0	0	0		0			0			0		0
'Carbon Sequestration|CCS'	17	0	14	1	13	12	34	0	59	26	84	20	31		311			11			REMIND		REMIND
'Carbon Sequestration|CCS|Biomass'	17	0	14	0	13	0	34	0	59	26	84	20	31		298			9			REMIND		REMIND
'Carbon Sequestration|CCS|Biomass|Energy'	1	0	0	0	0	0	9	0	0	0	38	0	0		48			3			REMIND		REMIND
'Carbon Sequestration|CCS|Biomass|Energy|Demand|Industry'	0	0	0	0	1	0	20	0	0	20	71	20	0		132			5			REMIND		REMIND
'Carbon Sequestration|CCS|Biomass|Energy|Supply'	14	0	14	0	1	0	20	0	50	20	68	20	29		236			9			REMIND		REMIND
'Carbon Sequestration|CCS|Biomass|Energy|Supply|Electricity'	14	0	14	0	1	0	20	0	50	20	71	20	29		239			9			REMIND		REMIND
'Carbon Sequestration|CCS|Biomass|Energy|Supply|Gases'	0	0	14	0	0	0	0	0	0	2	67	20	0		103			4			REMIND		REMIND
'Carbon Sequestration|CCS|Biomass|Energy|Supply|Hydrogen'	0	0	0	0	1	0	20	0	50	20	71	20	0		182			6			REMIND		REMIND
'Carbon Sequestration|CCS|Biomass|Energy|Supply|Liquids'	14	0	14	0	1	0	9	0	50	20	71	20	0		199			8			REMIND		REMIND
'Carbon Sequestration|CCS|Biomass|Energy|Supply|Other'	0	0	0	0	0	0	20	0	0	2	66	0	0		88			3			REMIND		REMIND
'Carbon Sequestration|CCS|Biomass|Industrial Processes'	0	0	0	0	0	0	8	0	0	0	0	0	0		8			1			IMAGE		0
'Carbon Sequestration|CCS|Fossil'	17	0	14	0	13	12	30	0	59	26	47	20	31		269			10			MESSAGE		MESSAGE
'Carbon Sequestration|CCS|Fossil|Energy'	1	0	0	0	0	0	9	0	0	0	0	0	0		10			2			IMAGE		IMAGE
'Carbon Sequestration|CCS|Fossil|Energy|Demand|Industry'	14	0	0	0	1	0	20	0	0	20	71	20	29		175			7			REMIND		REMIND
'Carbon Sequestration|CCS|Fossil|Energy|Supply'	14	0	14	0	1	12	20	0	50	20	70	20	29		250			10			REMIND		REMIND
'Carbon Sequestration|CCS|Fossil|Energy|Supply|Electricity'	14	0	14	0	1	12	20	0	50	20	0	20	29		180			9			MESSAGE		MESSAGE
'Carbon Sequestration|CCS|Fossil|Energy|Supply|Gases'	0	0	14	0	0	0	11	0	0	2	0	20	29		76			5			WITCH		WITCH
'Carbon Sequestration|CCS|Fossil|Energy|Supply|Hydrogen'	0	0	0	0	1	0	20	0	50	20	0	20	0		111			5			MESSAGE		MESSAGE
'Carbon Sequestration|CCS|Fossil|Energy|Supply|Liquids'	14	0	14	0	0	0	11	0	50	20	0	20	0		129			6			MESSAGE		MESSAGE
'Carbon Sequestration|CCS|Fossil|Energy|Supply|Other'	0	0	0	0	0	0	20	0	0	2	0	0	0		22			2			IMAGE		IMAGE
'Carbon Sequestration|CCS|Fossil|Industrial Processes'	1	0	0	0	0	0	0	0	0	0	0	0	0		1			1			AIM		0
'Carbon Sequestration|CCS|Industrial Processes'	14	0	0	0	13	0	18	0	53	18	70	20	0		206			7			REMIND		REMIND
'Carbon Sequestration|Direct Air Capture'	0	0	14	0	0	0	0	0	0	18	66	0	29		127			4			REMIND		REMIND
'Carbon Sequestration|Enhanced Weathering'	0	0	0	0	0	0	0	0	0	0	66	0	0		66			1			REMIND		0
'Carbon Sequestration|Feedstocks'	0	0	0	0	0	0	8	0	0	0	0	0	0		8			1			IMAGE		0
'Carbon Sequestration|Land Use'	2	0	14	0	0	0	25	0	51	20	35	20	31		198			8			MESSAGE		MESSAGE
'Carbon Sequestration|Land Use|Afforestation'	14	0	0	0	0	0	8	0	46	0	35	0	29		132			5			MESSAGE		MESSAGE
'Carbon Sequestration|Land Use|Biochar'	0	0	0	0	0	0	0	0	0	0	0	0	0		0			0			0		0
'Carbon Sequestration|Land Use|Other'	0	0	0	0	0	0	0	0	0	0	0	0	0		0			0			0		0
'Carbon Sequestration|Land Use|Soil Carbon Management'	0	0	0	0	0	0	0	0	0	0	0	0	0		0			0			0		0
'Carbon Sequestration|Other'	0	0	14	0	0	12	9	0	0	0	0	0	0		35			3			COFFEE		COFFEE
'Carbon Utilization|CCS|Industry'	0	0	0	0	0	0	0	0	0	0	38	0	0		38			1			REMIND		0
'Concentration|CH4'	12	0	0	1	0	0	24	0	2	0	70	0	0		109			5			REMIND		REMIND
'Concentration|CO2'	12	0	0	1	13	0	24	0	2	0	70	0	0		122			6			REMIND		REMIND
'Concentration|N2O'	12	0	0	1	0	0	24	0	2	0	70	0	0		109			5			REMIND		REMIND
'Consumption'	17	0	0	1	0	12	34	0	59	0	84	0	31		238			7			REMIND		REMIND
'Cumulative Capacity|Electricity|Biomass'	0	0	0	0	0	12	18	0	46	18	66	0	29		189			6			REMIND		REMIND
'Cumulative Capacity|Electricity|Biomass|w/ CCS'	14	0	14	0	0	12	18	0	46	18	66	20	29		237			9			REMIND		REMIND
'Cumulative Capacity|Electricity|Biomass|w/o CCS'	14	0	14	0	0	12	18	0	46	18	66	20	29		237			9			REMIND		REMIND
'Cumulative Capacity|Electricity|Coal'	0	0	0	0	0	12	18	0	46	18	66	0	29		189			6			REMIND		REMIND
'Cumulative Capacity|Electricity|Coal|w/ CCS'	13	0	14	0	0	12	18	0	46	18	66	20	29		236			9			REMIND		REMIND
'Cumulative Capacity|Electricity|Coal|w/o CCS'	14	0	14	0	0	12	18	0	46	18	66	20	29		237			9			REMIND		REMIND
'Cumulative Capacity|Electricity|Fossil'	0	0	0	0	0	12	18	0	46	18	66	0	29		189			6			REMIND		REMIND
'Cumulative Capacity|Electricity|Gas'	0	0	0	0	0	12	18	0	46	18	66	0	29		189			6			REMIND		REMIND
'Cumulative Capacity|Electricity|Gas|w/ CCS'	14	0	14	0	0	12	18	0	46	18	66	20	29		237			9			REMIND		REMIND
'Cumulative Capacity|Electricity|Gas|w/o CCS'	14	0	14	0	0	12	18	0	46	18	66	20	29		237			9			REMIND		REMIND
'Cumulative Capacity|Electricity|Geothermal'	14	0	14	0	0	12	0	0	46	18	0	0	0		104			5			MESSAGE		MESSAGE
'Cumulative Capacity|Electricity|Hydro'	14	0	14	0	0	12	18	0	46	18	66	20	29		237			9			REMIND		REMIND
'Cumulative Capacity|Electricity|Non-Biomass Renewables'	14	0	14	0	0	12	18	0	46	18	66	20	29		237			9			REMIND		REMIND
'Cumulative Capacity|Electricity|Nuclear'	14	0	14	0	0	12	18	0	46	18	66	20	29		237			9			REMIND		REMIND
'Cumulative Capacity|Electricity|Ocean'	0	0	0	0	0	0	0	0	0	0	0	0	0		0			0			0		0
'Cumulative Capacity|Electricity|Oil'	0	0	0	0	0	12	18	0	46	18	0	0	29		123			5			MESSAGE		MESSAGE
'Cumulative Capacity|Electricity|Oil|w/ CCS'	14	0	14	0	0	0	18	0	46	18	0	20	0		130			6			MESSAGE		MESSAGE
'Cumulative Capacity|Electricity|Oil|w/o CCS'	14	0	14	0	0	12	18	0	46	18	0	20	29		171			8			MESSAGE		MESSAGE
'Cumulative Capacity|Electricity|Other'	1	0	0	0	0	0	8	0	0	0	0	0	0		9			2			IMAGE		IMAGE
'Cumulative Capacity|Electricity|Renewables (incl. Biomass)'	14	0	14	0	0	12	18	0	46	18	66	20	29		237			9			REMIND		REMIND
'Cumulative Capacity|Electricity|Solar'	0	0	0	0	0	12	18	0	46	18	66	0	29		189			6			REMIND		REMIND
'Cumulative Capacity|Electricity|Solar|CSP'	0	0	14	0	0	0	18	0	46	18	66	20	29		211			7			REMIND		REMIND
'Cumulative Capacity|Electricity|Solar|PV'	14	0	14	0	0	12	18	0	46	18	66	20	29		237			9			REMIND		REMIND
'Cumulative Capacity|Electricity|Wind'	0	0	0	0	0	12	18	0	46	18	66	20	29		209			7			REMIND		REMIND
'Cumulative Capacity|Electricity|Wind|Offshore'	0	0	14	0	0	12	18	0	46	18	0	20	29		157			7			MESSAGE		MESSAGE
'Cumulative Capacity|Electricity|Wind|Onshore'	14	0	14	0	0	12	18	0	46	18	0	20	29		171			8			MESSAGE		MESSAGE
'Cumulative Capacity|Gases|Biomass'	0	0	0	0	0	0	0	0	46	0	0	0	0		46			1			MESSAGE		0
'Cumulative Capacity|Gases|Biomass|w/o CCS'	0	0	0	0	0	0	0	0	46	0	0	0	0		46			1			MESSAGE		0
'Cumulative Capacity|Gases|Coal'	0	0	0	0	0	0	0	0	46	0	0	0	0		46			1			MESSAGE		0
'Cumulative Capacity|Gases|Coal|w/o CCS'	0	0	0	0	0	0	0	0	46	0	0	0	0		46			1			MESSAGE		0
'Cumulative Capacity|Hydrogen|Biomass'	0	0	0	0	0	0	3	0	46	0	66	0	0		115			3			REMIND		REMIND
'Cumulative Capacity|Hydrogen|Biomass|w/ CCS'	0	0	0	0	0	0	3	0	46	0	66	0	0		115			3			REMIND		REMIND
'Cumulative Capacity|Hydrogen|Biomass|w/o CCS'	0	0	0	0	0	0	3	0	46	0	66	0	0		115			3			REMIND		REMIND
'Cumulative Capacity|Hydrogen|Coal'	0	0	0	0	0	0	3	0	46	0	0	0	0		49			2			MESSAGE		MESSAGE
'Cumulative Capacity|Hydrogen|Coal|w/ CCS'	0	0	0	0	0	0	3	0	46	0	0	0	0		49			2			MESSAGE		MESSAGE
'Cumulative Capacity|Hydrogen|Coal|w/o CCS'	0	0	0	0	0	0	3	0	46	0	0	0	0		49			2			MESSAGE		MESSAGE
'Cumulative Capacity|Hydrogen|Electricity'	0	0	0	0	0	0	3	0	45	0	66	0	27		141			4			REMIND		REMIND
'Cumulative Capacity|Hydrogen|Gas'	0	0	0	0	0	0	3	0	46	0	0	0	27		76			3			MESSAGE		MESSAGE
'Cumulative Capacity|Hydrogen|Gas|w/ CCS'	0	0	0	0	0	0	3	0	46	0	0	0	27		76			3			MESSAGE		MESSAGE
'Cumulative Capacity|Hydrogen|Gas|w/o CCS'	0	0	0	0	0	0	3	0	46	0	0	0	27		76			3			MESSAGE		MESSAGE
'Cumulative Capacity|Liquids|Biomass'	0	0	0	0	0	0	0	0	46	0	0	0	0		46			1			MESSAGE		0
'Cumulative Capacity|Liquids|Biomass|w/ CCS'	0	0	0	0	0	0	0	0	46	0	0	0	0		46			1			MESSAGE		0
'Cumulative Capacity|Liquids|Biomass|w/o CCS'	0	0	0	0	0	0	0	0	46	0	0	0	0		46			1			MESSAGE		0
'Cumulative Capacity|Liquids|Coal'	0	0	0	0	0	0	0	0	46	0	0	0	0		46			1			MESSAGE		0
'Cumulative Capacity|Liquids|Coal|w/ CCS'	0	0	0	0	0	0	0	0	46	0	0	0	0		46			1			MESSAGE		0
'Cumulative Capacity|Liquids|Coal|w/o CCS'	0	0	0	0	0	0	0	0	46	0	0	0	0		46			1			MESSAGE		0
'Cumulative Capacity|Liquids|Gas'	0	0	0	0	0	0	0	0	46	0	0	0	0		46			1			MESSAGE		0
'Cumulative Capacity|Liquids|Gas|w/ CCS'	0	0	0	0	0	0	0	0	46	0	0	0	0		46			1			MESSAGE		0
'Cumulative Capacity|Liquids|Gas|w/o CCS'	0	0	0	0	0	0	0	0	46	0	0	0	0		46			1			MESSAGE		0
'Cumulative Capacity|Liquids|Oil'	0	0	0	0	0	0	0	0	46	0	0	0	0		46			1			MESSAGE		0
'Discount rate|Economy'	0	0	0	0	0	0	0	0	0	0	0	0	0		0			0			0		0
'Discount rate|Electricity'	0	0	0	0	0	0	0	0	0	0	0	0	0		0			0			0		0
'Discount rate|Energy Supply'	0	0	0	0	0	0	0	0	0	0	0	0	0		0			0			0		0
'Discount rate|Industry'	0	0	0	0	0	0	0	0	0	0	0	0	0		0			0			0		0
'Discount rate|Mobility'	0	0	0	0	0	0	0	0	0	0	0	0	0		0			0			0		0
'Discount rate|Residential and Commercial'	0	0	0	0	0	0	0	0	0	0	0	0	0		0			0			0		0
'Discount rate|Social'	0	0	0	0	0	0	0	0	0	0	0	0	0		0			0			0		0
'Discount rate|Transport Infrastructure'	0	0	0	0	0	0	0	0	0	0	0	0	0		0			0			0		0
'Ecotoxicity|Freshwater|Electricity'	1	0	0	0	0	0	1	0	0	0	0	0	0		2			2			AIM		AIM
'Ecotoxicity|Marine|Electricity'	1	0	0	0	0	0	1	0	0	0	0	0	0		2			2			AIM		AIM
'Efficiency|Electricity|Biomass|w/ CCS'	14	0	0	0	0	0	3	0	0	18	66	0	29		130			5			REMIND		REMIND
'Efficiency|Electricity|Biomass|w/o CCS'	14	0	0	0	0	0	0	0	0	18	66	0	29		127			4			REMIND		REMIND
'Efficiency|Electricity|Coal|w/ CCS'	14	0	0	0	0	0	3	0	0	18	66	0	29		130			5			REMIND		REMIND
'Efficiency|Electricity|Coal|w/o CCS'	14	0	0	0	0	0	0	0	0	18	66	0	29		127			4			REMIND		REMIND
'Efficiency|Electricity|Gas|w/ CCS'	14	0	0	0	0	0	3	0	0	18	66	0	29		130			5			REMIND		REMIND
'Efficiency|Electricity|Gas|w/o CCS'	14	0	0	0	0	0	0	0	0	18	66	0	29		127			4			REMIND		REMIND
'Efficiency|Gases|Biomass|w/o CCS'	0	0	0	0	0	0	0	0	46	0	66	0	0		112			2			REMIND		REMIND
'Efficiency|Gases|Coal|w/o CCS'	0	0	0	0	0	0	0	0	46	0	66	0	0		112			2			REMIND		REMIND
'Efficiency|Hydrogen|Biomass|w/ CCS'	0	0	0	0	0	0	10	0	46	16	66	0	0		138			4			REMIND		REMIND
'Efficiency|Hydrogen|Biomass|w/o CCS'	0	0	0	0	0	0	10	0	46	16	66	0	0		138			4			REMIND		REMIND
'Efficiency|Hydrogen|Coal|w/ CCS'	0	0	0	0	0	0	10	0	46	16	66	0	0		138			4			REMIND		REMIND
'Efficiency|Hydrogen|Coal|w/o CCS'	0	0	0	0	0	0	10	0	46	16	66	0	0		138			4			REMIND		REMIND
'Efficiency|Hydrogen|Electricity'	0	0	0	0	0	0	18	0	45	16	66	0	0		145			4			REMIND		REMIND
'Efficiency|Hydrogen|Gas|w/ CCS'	0	0	0	0	0	0	10	0	46	16	66	0	0		138			4			REMIND		REMIND
'Efficiency|Hydrogen|Gas|w/o CCS'	0	0	0	0	0	0	0	0	46	16	66	0	0		128			3			REMIND		REMIND
'Efficiency|Liquids|Biomass|w/ CCS'	14	0	0	0	0	0	0	0	46	16	66	0	0		142			4			REMIND		REMIND
'Efficiency|Liquids|Biomass|w/o CCS'	14	0	0	0	0	0	0	0	46	16	66	0	0		142			4			REMIND		REMIND
'Efficiency|Liquids|Coal|w/ CCS'	0	0	0	0	0	0	0	0	46	16	66	0	0		128			3			REMIND		REMIND
'Efficiency|Liquids|Coal|w/o CCS'	0	0	0	0	0	0	0	0	46	16	66	0	0		128			3			REMIND		REMIND
'Efficiency|Liquids|Gas|w/ CCS'	0	0	0	0	0	0	0	0	46	16	0	0	0		62			2			MESSAGE		MESSAGE
'Efficiency|Liquids|Gas|w/o CCS'	0	0	0	0	0	0	0	0	46	16	0	0	0		62			2			MESSAGE		MESSAGE
'Efficiency|Liquids|Oil'	0	0	0	0	0	0	0	0	0	0	66	0	0		66			1			REMIND		0
'Emissions|BC'	17	0	0	1	1	0	34	0	59	24	83	0	31		250			8			REMIND		REMIND
'Emissions|BC|AFOLU'	14	0	0	0	1	0	22	0	48	0	73	0	29		187			6			REMIND		REMIND
'Emissions|BC|AFOLU|Agriculture'	0	0	0	0	0	0	0	0	3	0	18	0	0		21			2			REMIND		REMIND
'Emissions|BC|AFOLU|Land'	1	0	0	0	0	0	0	0	3	0	0	0	0		4			2			MESSAGE		MESSAGE
'Emissions|BC|Energy'	14	0	0	0	1	0	22	0	48	0	73	0	29		187			6			REMIND		REMIND
'Emissions|BC|Energy|Demand|Industry'	14	0	0	0	1	0	22	0	48	0	73	0	29		187			6			REMIND		REMIND
'Emissions|BC|Energy|Demand|Residential and Commercial'	2	0	0	0	1	0	12	0	48	0	73	0	29		165			6			REMIND		REMIND
'Emissions|BC|Energy|Demand|Residential and Commercial|Commercial'	0	0	0	0	0	0	8	0	0	0	0	0	0		8			1			IMAGE		0
'Emissions|BC|Energy|Demand|Residential and Commercial|Residential'	0	0	0	0	0	0	8	0	0	0	0	0	0		8			1			IMAGE		0
'Emissions|BC|Energy|Demand|Transportation'	14	0	0	0	1	0	22	0	48	0	73	0	29		187			6			REMIND		REMIND
'Emissions|BC|Energy|Supply'	14	0	0	0	1	0	22	0	48	0	73	0	29		187			6			REMIND		REMIND
'Emissions|BC|Industrial Processes'	1	0	0	0	0	0	0	0	3	0	0	0	0		4			2			MESSAGE		MESSAGE
'Emissions|BC|Other'	0	0	0	0	0	0	0	0	0	0	66	0	29		95			2			REMIND		REMIND
'Emissions|BC|Waste'	1	0	0	0	0	0	0	0	3	0	38	0	0		42			3			REMIND		REMIND
'Emissions|C2F6'	1	0	0	0	13	0	9	0	0	0	0	0	1		24			4			GCAM		GCAM
'Emissions|CF4'	1	0	0	0	1	0	9	0	5	0	0	0	1		17			5			IMAGE		IMAGE
'Emissions|CH4'	17	0	14	1	13	12	34	0	59	26	84	20	31		311			11			REMIND		REMIND
'Emissions|CH4|AFOLU'	17	0	14	0	13	0	29	0	51	20	76	0	31		251			8			REMIND		REMIND
'Emissions|CH4|AFOLU|Agriculture'	13	0	0	0	1	0	15	0	46	0	66	0	27		168			6			REMIND		REMIND
'Emissions|CH4|AFOLU|Agriculture|Livestock'	13	0	0	0	0	0	14	0	46	0	66	0	0		139			4			REMIND		REMIND
'Emissions|CH4|AFOLU|Agriculture|Livestock|Enteric Fermentation'	1	0	0	0	0	0	15	0	46	0	66	0	0		128			4			REMIND		REMIND
'Emissions|CH4|AFOLU|Agriculture|Livestock|Manure Management'	13	0	0	0	0	0	15	0	46	0	66	0	0		140			4			REMIND		REMIND
'Emissions|CH4|AFOLU|Agriculture|Rice'	1	0	0	0	0	0	15	0	46	0	66	0	0		128			4			REMIND		REMIND
'Emissions|CH4|AFOLU|Land'	1	0	0	0	0	0	9	0	3	0	0	0	0		13			3			IMAGE		IMAGE
'Emissions|CH4|Energy'	17	0	14	0	13	0	27	0	49	0	75	0	29		224			7			REMIND		REMIND
'Emissions|CH4|Energy|Demand|Industry'	14	0	0	0	1	0	24	0	50	18	0	0	0		107			5			MESSAGE		MESSAGE
'Emissions|CH4|Energy|Demand|Residential and Commercial'	2	0	0	0	1	0	24	0	48	20	3	0	0		98			6			MESSAGE		MESSAGE
'Emissions|CH4|Energy|Demand|Residential and Commercial|Commercial'	0	0	0	0	0	0	8	0	0	0	0	0	0		8			1			IMAGE		0
'Emissions|CH4|Energy|Demand|Residential and Commercial|Residential'	0	0	0	0	0	0	8	0	0	0	0	0	0		8			1			IMAGE		0
'Emissions|CH4|Energy|Demand|Transportation'	14	0	0	0	1	0	24	0	50	18	0	0	0		107			5			MESSAGE		MESSAGE
'Emissions|CH4|Energy|Supply'	14	0	0	0	1	0	24	0	50	20	74	0	29		212			7			REMIND		REMIND
'Emissions|CH4|Industrial Processes'	1	0	0	0	0	0	9	0	3	0	0	0	0		13			3			IMAGE		IMAGE
'Emissions|CH4|Industrial Processes|Chemicals'	0	0	0	0	0	0	8	0	0	0	0	0	0		8			1			IMAGE		0
'Emissions|CH4|Industrial Processes|Steel'	0	0	0	0	0	0	8	0	0	0	0	0	0		8			1			IMAGE		0
'Emissions|CH4|Other'	0	0	14	0	1	0	18	0	0	18	70	0	29		150			6			REMIND		REMIND
'Emissions|CH4|Waste'	1	0	0	0	0	0	9	0	3	0	38	0	0		51			4			REMIND		REMIND
'Emissions|CO'	16	0	0	1	13	0	32	0	59	24	82	0	29		256			8			REMIND		REMIND
'Emissions|CO2'	17	0	14	1	13	12	34	0	59	26	84	20	31		311			11			REMIND		REMIND
'Emissions|CO2|AFOLU'	17	0	14	1	13	12	34	0	59	26	81	20	31		308			11			REMIND		REMIND
'Emissions|CO2|AFOLU|Agriculture'	0	0	0	0	0	0	0	0	3	0	0	0	0		3			1			MESSAGE		0
'Emissions|CO2|AFOLU|Land'	1	0	0	0	0	0	9	0	0	0	0	0	0		10			2			IMAGE		IMAGE
'Emissions|CO2|Energy'	15	0	14	1	13	12	20	0	53	18	71	20	29		266			11			REMIND		REMIND
'Emissions|CO2|Energy and Industrial Processes'	17	0	14	0	13	12	34	0	54	26	84	20	31		305			10			REMIND		REMIND
'Emissions|CO2|Energy|Demand'	17	0	14	0	13	12	34	0	59	26	84	20	29		308			10			REMIND		REMIND
'Emissions|CO2|Energy|Demand|AFOFI'	14	0	0	0	0	12	0	0	50	20	0	0	29		125			5			MESSAGE		MESSAGE
'Emissions|CO2|Energy|Demand|Industry'	17	0	14	0	13	12	34	0	59	26	72	20	31		298			10			REMIND		REMIND
'Emissions|CO2|Energy|Demand|Industry|Cement'	0	0	0	0	0	0	0	0	0	0	0	0	0		0			0			0		0
'Emissions|CO2|Energy|Demand|Industry|Chemicals'	0	0	0	0	0	0	8	0	0	0	0	0	0		8			1			IMAGE		0
'Emissions|CO2|Energy|Demand|Industry|Chemicals|Ammonia'	0	0	0	0	0	0	0	0	0	0	0	0	0		0			0			0		0
'Emissions|CO2|Energy|Demand|Industry|Chemicals|High value chemicals'	0	0	0	0	0	0	0	0	0	0	0	0	0		0			0			0		0
'Emissions|CO2|Energy|Demand|Industry|Chemicals|Methanol'	0	0	0	0	0	0	0	0	0	0	0	0	0		0			0			0		0
'Emissions|CO2|Energy|Demand|Industry|Chemicals|Other'	0	0	0	0	0	0	0	0	0	0	0	0	0		0			0			0		0
'Emissions|CO2|Energy|Demand|Industry|Non-ferrous metals'	0	0	0	0	0	0	0	0	0	0	0	0	0		0			0			0		0
'Emissions|CO2|Energy|Demand|Industry|Other'	0	0	0	0	0	0	0	0	0	0	0	0	0		0			0			0		0
'Emissions|CO2|Energy|Demand|Industry|Pulp and Paper'	0	0	0	0	0	0	8	0	0	0	0	0	0		8			1			IMAGE		0
'Emissions|CO2|Energy|Demand|Industry|Steel'	0	0	0	0	0	0	8	0	0	0	0	0	0		8			1			IMAGE		0
'Emissions|CO2|Energy|Demand|Other Sector'	0	0	0	0	0	0	18	0	43	0	0	20	29		110			4			MESSAGE		MESSAGE
'Emissions|CO2|Energy|Demand|Residential and Commercial'	5	0	1	0	13	12	34	0	53	20	72	20	31		261			10			REMIND		REMIND
'Emissions|CO2|Energy|Demand|Residential and Commercial|Commercial'	13	0	13	0	13	12	17	0	0	18	0	20	28		134			8			WITCH		WITCH
'Emissions|CO2|Energy|Demand|Residential and Commercial|Commercial|Heating'	0	0	0	0	0	0	0	0	0	0	0	0	0		0			0			0		0
'Emissions|CO2|Energy|Demand|Residential and Commercial|Commercial|Heating|Cooking'	0	0	0	0	0	0	0	0	0	0	0	0	0		0			0			0		0
'Emissions|CO2|Energy|Demand|Residential and Commercial|Commercial|Heating|Space'	0	0	0	0	0	0	0	0	0	0	0	0	0		0			0			0		0
'Emissions|CO2|Energy|Demand|Residential and Commercial|Commercial|Heating|Water'	0	0	0	0	0	0	0	0	0	0	0	0	0		0			0			0		0
'Emissions|CO2|Energy|Demand|Residential and Commercial|Residential'	13	0	13	0	13	12	17	0	0	18	0	20	28		134			8			WITCH		WITCH
'Emissions|CO2|Energy|Demand|Residential and Commercial|Residential|Heating'	0	0	0	0	0	0	0	0	0	0	0	0	0		0			0			0		0
'Emissions|CO2|Energy|Demand|Residential and Commercial|Residential|Heating|Cooking'	0	0	0	0	0	0	0	0	0	0	0	0	0		0			0			0		0
'Emissions|CO2|Energy|Demand|Residential and Commercial|Residential|Heating|Space'	0	0	0	0	0	0	0	0	0	0	0	0	0		0			0			0		0
'Emissions|CO2|Energy|Demand|Residential and Commercial|Residential|Heating|Water'	0	0	0	0	0	0	0	0	0	0	0	0	0		0			0			0		0
'Emissions|CO2|Energy|Demand|Transportation'	14	0	14	0	13	12	29	0	58	26	79	20	29		294			10			REMIND		REMIND
'Emissions|CO2|Energy|Demand|Transportation|Aviation'	1	0	0	0	0	0	8	0	5	0	0	0	0		14			3			IMAGE		IMAGE
'Emissions|CO2|Energy|Demand|Transportation|Aviation|Freight'	0	0	0	0	0	0	8	0	0	0	0	0	0		8			1			IMAGE		0
'Emissions|CO2|Energy|Demand|Transportation|Aviation|Passenger'	0	0	0	0	0	0	8	0	0	0	0	0	0		8			1			IMAGE		0
'Emissions|CO2|Energy|Demand|Transportation|Freight'	0	0	0	0	1	0	0	0	0	0	9	0	29		39			3			WITCH		WITCH
'Emissions|CO2|Energy|Demand|Transportation|Maritime'	0	0	0	0	0	0	8	0	0	0	0	0	0		8			1			IMAGE		0
'Emissions|CO2|Energy|Demand|Transportation|Maritime|Freight'	0	0	0	0	0	0	0	0	0	0	0	0	0		0			0			0		0
'Emissions|CO2|Energy|Demand|Transportation|Maritime|Passenger'	0	0	0	0	0	0	0	0	0	0	0	0	0		0			0			0		0
'Emissions|CO2|Energy|Demand|Transportation|Passenger'	0	0	0	0	1	0	0	0	0	0	9	0	29		39			3			WITCH		WITCH
'Emissions|CO2|Energy|Demand|Transportation|Rail'	1	0	0	0	0	0	8	0	0	0	0	0	0		9			2			IMAGE		IMAGE
'Emissions|CO2|Energy|Demand|Transportation|Rail|Freight'	0	0	0	0	0	0	8	0	0	0	0	0	0		8			1			IMAGE		0
'Emissions|CO2|Energy|Demand|Transportation|Rail|Passenger'	0	0	0	0	0	0	8	0	0	0	0	0	0		8			1			IMAGE		0
'Emissions|CO2|Energy|Demand|Transportation|Road'	1	0	0	0	0	0	8	0	0	0	0	0	0		9			2			IMAGE		IMAGE
'Emissions|CO2|Energy|Demand|Transportation|Road|Freight'	0	0	0	0	0	0	8	0	0	0	0	0	0		8			1			IMAGE		0
'Emissions|CO2|Energy|Demand|Transportation|Road|Passenger'	0	0	0	0	0	0	8	0	0	0	0	0	0		8			1			IMAGE		0
'Emissions|CO2|Energy|Demand|Transportation|Road|Passenger|2W&3W'	0	0	0	0	0	0	0	0	0	0	0	0	0		0			0			0		0
'Emissions|CO2|Energy|Demand|Transportation|Road|Passenger|Bus'	0	0	0	0	0	0	0	0	0	0	0	0	0		0			0			0		0
'Emissions|CO2|Energy|Demand|Transportation|Road|Passenger|LDV'	0	0	0	0	0	0	8	0	0	0	29	0	0		37			2			REMIND		REMIND
'Emissions|CO2|Energy|Supply'	17	0	14	0	13	12	34	0	54	26	84	20	31		305			10			REMIND		REMIND
'Emissions|CO2|Energy|Supply|Electricity'	17	0	14	0	13	12	34	0	54	26	81	20	31		302			10			REMIND		REMIND
'Emissions|CO2|Energy|Supply|Gases'	0	0	14	0	12	12	20	0	45	2	66	0	0		171			7			REMIND		REMIND
'Emissions|CO2|Energy|Supply|Heat'	0	0	0	0	13	0	20	0	50	0	71	0	0		154			4			REMIND		REMIND
'Emissions|CO2|Energy|Supply|Liquids'	0	0	14	0	12	12	20	0	45	2	68	0	0		173			7			REMIND		REMIND
'Emissions|CO2|Energy|Supply|Other Sector'	0	0	0	0	12	0	0	0	0	0	38	20	0		70			3			REMIND		REMIND
'Emissions|CO2|Energy|Supply|Solids'	0	0	0	0	12	12	20	0	45	2	66	0	0		157			6			REMIND		REMIND
'Emissions|CO2|Industrial Processes'	14	0	14	1	13	12	18	0	53	18	70	20	29		262			11			REMIND		REMIND
'Emissions|CO2|Industrial Processes|Cement'	0	0	0	0	0	0	8	0	0	0	2	0	0		10			2			IMAGE		IMAGE
'Emissions|CO2|Industrial Processes|Chemicals'	0	0	0	0	0	0	0	0	0	0	0	0	0		0			0			0		0
'Emissions|CO2|Industrial Processes|Chemicals|Ammonia'	0	0	0	0	0	0	0	0	0	0	0	0	0		0			0			0		0
'Emissions|CO2|Industrial Processes|Chemicals|High value chemicals'	0	0	0	0	0	0	0	0	0	0	0	0	0		0			0			0		0
'Emissions|CO2|Industrial Processes|Chemicals|Methanol'	0	0	0	0	0	0	0	0	0	0	0	0	0		0			0			0		0
'Emissions|CO2|Industrial Processes|Chemicals|Other'	0	0	0	0	0	0	0	0	0	0	0	0	0		0			0			0		0
'Emissions|CO2|Industrial Processes|Non-ferrous metals'	0	0	0	0	0	0	0	0	0	0	0	0	0		0			0			0		0
'Emissions|CO2|Industrial Processes|Other'	0	0	0	0	0	0	0	0	0	0	0	0	0		0			0			0		0
'Emissions|CO2|Industrial Processes|Pulp and Paper'	0	0	0	0	0	0	8	0	0	0	0	0	0		8			1			IMAGE		0
'Emissions|CO2|Industrial Processes|Steel'	0	0	0	0	0	0	8	0	0	0	0	0	0		8			1			IMAGE		0
'Emissions|CO2|Other'	0	0	0	0	0	0	5	0	3	18	56	20	0		102			5			REMIND		REMIND
'Emissions|CO2|Waste'	1	0	0	0	0	0	0	0	3	0	0	0	0		4			2			MESSAGE		MESSAGE
'Emissions|CO|AFOLU'	14	0	0	0	1	0	22	0	48	0	73	0	29		187			6			REMIND		REMIND
'Emissions|CO|AFOLU|Agriculture'	0	0	0	0	0	0	0	0	3	0	0	0	0		3			1			MESSAGE		0
'Emissions|CO|AFOLU|Land'	1	0	0	0	0	0	0	0	3	0	0	0	0		4			2			MESSAGE		MESSAGE
'Emissions|CO|Energy'	14	0	0	0	1	0	22	0	48	0	73	0	29		187			6			REMIND		REMIND
'Emissions|CO|Energy|Demand|Industry'	14	0	0	0	1	0	18	0	48	0	73	0	29		183			6			REMIND		REMIND
'Emissions|CO|Energy|Demand|Residential and Commercial'	2	0	0	0	1	0	18	0	48	0	73	0	29		171			6			REMIND		REMIND
'Emissions|CO|Energy|Demand|Residential and Commercial|Commercial'	0	0	0	0	0	0	8	0	0	0	0	0	0		8			1			IMAGE		0
'Emissions|CO|Energy|Demand|Residential and Commercial|Residential'	0	0	0	0	0	0	8	0	0	0	0	0	0		8			1			IMAGE		0
'Emissions|CO|Energy|Demand|Transportation'	14	0	0	0	1	0	22	0	48	0	73	0	29		187			6			REMIND		REMIND
'Emissions|CO|Energy|Supply'	14	0	0	0	1	0	22	0	48	0	73	0	29		187			6			REMIND		REMIND
'Emissions|CO|Industrial Processes'	1	0	0	0	0	0	8	0	3	0	0	0	0		12			3			IMAGE		IMAGE
'Emissions|CO|Other'	0	0	0	0	0	0	0	0	0	0	37	0	29		66			2			REMIND		REMIND
'Emissions|CO|Waste'	1	0	0	0	0	0	0	0	3	0	38	0	0		42			3			REMIND		REMIND
'Emissions|F-Gases'	17	0	0	1	13	12	34	0	51	26	84	0	31		269			9			REMIND		REMIND
'Emissions|HFC'	14	0	0	1	13	12	27	0	56	20	74	0	29		246			9			REMIND		REMIND
'Emissions|HFC|HFC125'	16	0	0	0	13	0	32	0	51	8	5	0	29		154			7			MESSAGE		MESSAGE
'Emissions|HFC|HFC134a'	16	0	0	0	13	0	32	0	51	8	5	0	29		154			7			MESSAGE		MESSAGE
'Emissions|HFC|HFC143a'	16	0	0	0	13	0	32	0	51	8	5	0	29		154			7			MESSAGE		MESSAGE
'Emissions|HFC|HFC227ea'	16	0	0	0	13	0	32	0	51	8	5	0	29		154			7			MESSAGE		MESSAGE
'Emissions|HFC|HFC23'	16	0	0	0	13	0	32	0	51	8	5	0	29		154			7			MESSAGE		MESSAGE
'Emissions|HFC|HFC245fa'	14	0	0	0	13	0	27	0	51	0	4	0	29		138			6			MESSAGE		MESSAGE
'Emissions|HFC|HFC32'	16	0	0	0	13	0	32	0	51	8	5	0	29		154			7			MESSAGE		MESSAGE
'Emissions|HFC|HFC43-10'	16	0	0	0	12	0	32	0	51	8	5	0	29		153			7			MESSAGE		MESSAGE
'Emissions|HFC|Industrial Processes'	0	0	0	0	0	0	0	0	0	0	0	0	0		0			0			0		0
'Emissions|Kyoto Gases'	17	0	14	1	13	12	32	0	57	24	83	0	31		284			10			REMIND		REMIND
'Emissions|N2O'	17	0	14	1	13	12	34	0	59	26	84	20	31		311			11			REMIND		REMIND
'Emissions|N2O|AFOLU'	17	0	14	0	13	0	29	0	51	20	76	0	31		251			8			REMIND		REMIND
'Emissions|N2O|AFOLU|Agriculture'	13	0	0	0	1	0	15	0	46	0	66	0	27		168			6			REMIND		REMIND
'Emissions|N2O|AFOLU|Agriculture|Livestock|Manure Management'	13	0	0	0	0	0	15	0	46	0	66	0	0		140			4			REMIND		REMIND
'Emissions|N2O|AFOLU|Agriculture|Managed Soils'	13	0	0	0	0	0	15	0	46	0	66	0	0		140			4			REMIND		REMIND
'Emissions|N2O|AFOLU|Land'	1	0	0	0	0	0	9	0	3	0	0	0	0		13			3			IMAGE		IMAGE
'Emissions|N2O|Energy'	15	0	14	0	13	0	20	0	48	18	71	0	29		228			8			REMIND		REMIND
'Emissions|N2O|Energy|Demand|Residential and Commercial|Commercial'	0	0	0	0	0	0	8	0	0	0	0	0	0		8			1			IMAGE		0
'Emissions|N2O|Energy|Demand|Residential and Commercial|Residential'	0	0	0	0	0	0	8	0	0	0	0	0	0		8			1			IMAGE		0
'Emissions|N2O|Energy|Demand|Transportation'	1	0	0	0	0	0	9	0	3	0	38	0	0		51			4			REMIND		REMIND
'Emissions|N2O|Industrial Processes'	1	0	0	0	0	0	9	0	3	0	38	0	0		51			4			REMIND		REMIND
'Emissions|N2O|Industrial Processes|Chemicals'	0	0	0	0	0	0	8	0	0	0	0	0	0		8			1			IMAGE		0
'Emissions|N2O|Other'	0	0	14	0	1	0	18	0	0	18	35	0	29		115			6			REMIND		REMIND
'Emissions|N2O|Waste'	1	0	0	0	0	0	9	0	3	0	38	0	0		51			4			REMIND		REMIND
'Emissions|NH3'	16	0	0	1	13	0	32	0	59	24	82	0	29		256			8			REMIND		REMIND
'Emissions|NH3|AFOLU'	14	0	0	0	1	0	22	0	48	0	73	0	29		187			6			REMIND		REMIND
'Emissions|NH3|AFOLU|Agriculture'	1	0	0	0	0	0	9	0	3	0	0	0	0		13			3			IMAGE		IMAGE
'Emissions|NH3|AFOLU|Land'	1	0	0	0	0	0	0	0	3	0	0	0	0		4			2			MESSAGE		MESSAGE
'Emissions|NH3|Energy'	14	0	0	0	1	0	22	0	48	0	73	0	29		187			6			REMIND		REMIND
'Emissions|NH3|Energy|Demand|Industry'	14	0	0	0	1	0	22	0	48	0	73	0	29		187			6			REMIND		REMIND
'Emissions|NH3|Energy|Demand|Residential and Commercial'	2	0	0	0	1	0	22	0	48	0	73	0	29		175			6			REMIND		REMIND
'Emissions|NH3|Energy|Demand|Transportation'	14	0	0	0	1	0	22	0	48	0	73	0	29		187			6			REMIND		REMIND
'Emissions|NH3|Energy|Supply'	14	0	0	0	1	0	22	0	48	0	73	0	29		187			6			REMIND		REMIND
'Emissions|NH3|Industrial Processes'	1	0	0	0	0	0	0	0	3	0	0	0	0		4			2			MESSAGE		MESSAGE
'Emissions|NH3|Other'	0	0	0	0	0	0	0	0	0	0	37	0	0		37			1			REMIND		0
'Emissions|NH3|Waste'	1	0	0	0	0	0	0	0	3	0	38	0	0		42			3			REMIND		REMIND
'Emissions|NOx'	16	0	0	1	13	0	32	0	59	24	83	0	29		257			8			REMIND		REMIND
'Emissions|NOx|AFOLU'	14	0	0	0	1	0	18	0	48	0	73	0	29		183			6			REMIND		REMIND
'Emissions|NOx|AFOLU|Agriculture'	1	0	0	0	0	0	8	0	3	0	0	0	0		12			3			IMAGE		IMAGE
'Emissions|NOx|AFOLU|Land'	1	0	0	0	0	0	0	0	3	0	0	0	0		4			2			MESSAGE		MESSAGE
'Emissions|NOx|Energy'	14	0	0	0	1	0	18	0	48	0	73	0	29		183			6			REMIND		REMIND
'Emissions|NOx|Energy|Demand|Industry'	14	0	0	0	1	0	15	0	48	0	70	0	29		177			6			REMIND		REMIND
'Emissions|NOx|Energy|Demand|Residential and Commercial'	2	0	0	0	1	0	15	0	48	0	70	0	29		165			6			REMIND		REMIND
'Emissions|NOx|Energy|Demand|Residential and Commercial|Commercial'	0	0	0	0	0	0	8	0	0	0	0	0	0		8			1			IMAGE		0
'Emissions|NOx|Energy|Demand|Residential and Commercial|Residential'	0	0	0	0	0	0	8	0	0	0	0	0	0		8			1			IMAGE		0
'Emissions|NOx|Energy|Demand|Transportation'	14	0	0	0	1	0	19	0	48	0	73	0	29		184			6			REMIND		REMIND
'Emissions|NOx|Energy|Supply'	14	0	0	0	1	0	19	0	48	0	73	0	29		184			6			REMIND		REMIND
'Emissions|NOx|Industrial Processes'	1	0	0	0	0	0	8	0	3	0	0	0	0		12			3			IMAGE		IMAGE
'Emissions|NOx|Other'	0	0	0	0	0	0	0	0	0	0	37	0	29		66			2			REMIND		REMIND
'Emissions|NOx|Waste'	1	0	0	0	0	0	0	0	3	0	38	0	0		42			3			REMIND		REMIND
'Emissions|OC'	16	0	0	1	13	0	32	0	59	24	83	0	29		257			8			REMIND		REMIND
'Emissions|OC|AFOLU'	14	0	0	0	1	0	22	0	48	0	73	0	29		187			6			REMIND		REMIND
'Emissions|OC|AFOLU|Agriculture'	0	0	0	0	0	0	0	0	3	0	0	0	0		3			1			MESSAGE		0
'Emissions|OC|AFOLU|Land'	1	0	0	0	0	0	0	0	3	0	0	0	0		4			2			MESSAGE		MESSAGE
'Emissions|OC|Energy'	14	0	0	0	1	0	22	0	48	0	73	0	29		187			6			REMIND		REMIND
'Emissions|OC|Energy|Demand|Industry'	14	0	0	0	1	0	22	0	48	0	73	0	29		187			6			REMIND		REMIND
'Emissions|OC|Energy|Demand|Residential and Commercial'	2	0	0	0	1	0	22	0	48	0	73	0	29		175			6			REMIND		REMIND
'Emissions|OC|Energy|Demand|Residential and Commercial|Commercial'	0	0	0	0	0	0	8	0	0	0	0	0	0		8			1			IMAGE		0
'Emissions|OC|Energy|Demand|Residential and Commercial|Residential'	0	0	0	0	0	0	8	0	0	0	0	0	0		8			1			IMAGE		0
'Emissions|OC|Energy|Demand|Transportation'	14	0	0	0	1	0	22	0	48	0	73	0	29		187			6			REMIND		REMIND
'Emissions|OC|Energy|Supply'	14	0	0	0	1	0	22	0	48	0	73	0	29		187			6			REMIND		REMIND
'Emissions|OC|Industrial Processes'	1	0	0	0	0	0	0	0	3	0	0	0	0		4			2			MESSAGE		MESSAGE
'Emissions|OC|Other'	0	0	0	0	0	0	0	0	0	0	37	0	29		66			2			REMIND		REMIND
'Emissions|OC|Waste'	1	0	0	0	0	0	0	0	3	0	38	0	0		42			3			REMIND		REMIND
'Emissions|PFC'	16	0	0	1	13	12	32	0	3	26	75	0	29		207			9			REMIND		REMIND
'Emissions|PFC|C2F6'	1	0	0	0	0	0	22	0	0	0	3	0	28		54			4			WITCH		WITCH
'Emissions|PFC|C6F14'	1	0	0	0	0	0	22	0	0	0	3	0	28		54			4			WITCH		WITCH
'Emissions|PFC|CF4'	1	0	0	0	0	0	22	0	48	0	3	0	28		102			5			MESSAGE		MESSAGE
'Emissions|PM2.5'	1	0	0	0	0	0	1	0	0	0	0	0	0		2			2			AIM		AIM
'Emissions|SF6'	16	0	0	1	13	12	32	0	51	26	75	0	29		255			9			REMIND		REMIND
'Emissions|Sulfur'	17	0	14	1	13	12	34	0	59	26	84	20	31		311			11			REMIND		REMIND
'Emissions|Sulfur|AFOLU'	14	0	0	0	1	0	22	0	48	0	73	0	29		187			6			REMIND		REMIND
'Emissions|Sulfur|AFOLU|Agriculture'	0	0	0	0	0	0	0	0	3	0	0	0	0		3			1			MESSAGE		0
'Emissions|Sulfur|AFOLU|Land'	1	0	0	0	0	0	0	0	3	0	0	0	0		4			2			MESSAGE		MESSAGE
'Emissions|Sulfur|Energy'	14	0	0	0	1	0	22	0	48	0	73	0	29		187			6			REMIND		REMIND
'Emissions|Sulfur|Energy|Demand|Industry'	14	0	0	0	1	0	22	0	48	0	73	0	29		187			6			REMIND		REMIND
'Emissions|Sulfur|Energy|Demand|Residential and Commercial'	2	0	0	0	1	0	22	0	48	0	73	0	29		175			6			REMIND		REMIND
'Emissions|Sulfur|Energy|Demand|Residential and Commercial|Commercial'	0	0	0	0	0	0	8	0	0	0	0	0	0		8			1			IMAGE		0
'Emissions|Sulfur|Energy|Demand|Residential and Commercial|Residential'	0	0	0	0	0	0	8	0	0	0	0	0	0		8			1			IMAGE		0
'Emissions|Sulfur|Energy|Demand|Transportation'	14	0	0	0	1	0	22	0	48	0	73	0	29		187			6			REMIND		REMIND
'Emissions|Sulfur|Energy|Supply'	14	0	0	0	1	0	22	0	48	0	73	0	29		187			6			REMIND		REMIND
'Emissions|Sulfur|Industrial Processes'	1	0	0	0	0	0	8	0	3	0	0	0	0		12			3			IMAGE		IMAGE
'Emissions|Sulfur|Other'	0	0	0	0	0	0	0	0	0	0	37	0	29		66			2			REMIND		REMIND
'Emissions|Sulfur|Waste'	1	0	0	0	0	0	0	0	3	0	38	0	0		42			3			REMIND		REMIND
'Emissions|VOC'	16	0	0	1	13	0	32	0	59	24	82	0	29		256			8			REMIND		REMIND
'Emissions|VOC|AFOLU'	14	0	0	0	1	0	22	0	48	0	73	0	29		187			6			REMIND		REMIND
'Emissions|VOC|AFOLU|Agriculture'	0	0	0	0	0	0	0	0	3	0	0	0	0		3			1			MESSAGE		0
'Emissions|VOC|AFOLU|Land'	1	0	0	0	0	0	0	0	3	0	0	0	0		4			2			MESSAGE		MESSAGE
'Emissions|VOC|Energy'	14	0	0	0	1	0	22	0	48	0	73	0	29		187			6			REMIND		REMIND
'Emissions|VOC|Energy|Demand|Industry'	14	0	0	0	1	0	22	0	48	0	73	0	29		187			6			REMIND		REMIND
'Emissions|VOC|Energy|Demand|Residential and Commercial'	2	0	0	0	1	0	22	0	48	0	73	0	29		175			6			REMIND		REMIND
'Emissions|VOC|Energy|Demand|Residential and Commercial|Commercial'	0	0	0	0	0	0	8	0	0	0	0	0	0		8			1			IMAGE		0
'Emissions|VOC|Energy|Demand|Residential and Commercial|Residential'	0	0	0	0	0	0	8	0	0	0	0	0	0		8			1			IMAGE		0
'Emissions|VOC|Energy|Demand|Transportation'	14	0	0	0	1	0	22	0	48	0	73	0	29		187			6			REMIND		REMIND
'Emissions|VOC|Energy|Supply'	14	0	0	0	1	0	22	0	48	0	73	0	29		187			6			REMIND		REMIND
'Emissions|VOC|Industrial Processes'	1	0	0	0	0	0	8	0	3	0	0	0	0		12			3			IMAGE		IMAGE
'Emissions|VOC|Other'	0	0	0	0	0	0	0	0	0	0	37	0	29		66			2			REMIND		REMIND
'Emissions|VOC|Waste'	1	0	0	0	0	0	0	0	3	0	38	0	0		42			3			REMIND		REMIND
'Employment'	0	0	0	0	0	12	0	0	0	0	0	0	0		12			1			GEM-E3		0
'Employment|Agriculture'	0	0	0	0	0	12	0	0	0	0	0	0	0		12			1			GEM-E3		0
'Employment|Industry'	0	0	0	0	0	12	0	0	0	0	0	0	0		12			1			GEM-E3		0
'Employment|Industry|Energy'	0	0	0	0	0	0	0	0	0	0	0	0	0		0			0			0		0
'Employment|Industry|Energy Intensive'	0	0	0	0	0	12	0	0	0	0	0	0	0		12			1			GEM-E3		0
'Employment|Industry|Manufacturing'	0	0	0	0	0	0	0	0	0	0	0	0	0		0			0			0		0
'Employment|Service'	0	0	0	0	0	12	0	0	0	0	0	0	0		12			1			GEM-E3		0
'Energy Service|Residential and Commercial|Commercial|Floor Space'	0	0	0	0	0	0	0	0	0	0	0	0	0		0			0			0		0
'Energy Service|Residential and Commercial|Floor Space'	0	0	0	0	0	0	0	0	0	0	0	0	0		0			0			0		0
'Energy Service|Residential and Commercial|Residential|Floor Space'	0	0	0	0	0	0	8	0	0	0	0	0	0		8			1			IMAGE		0
'Energy Service|Transportation|Aviation'	0	0	0	0	0	0	0	0	0	0	9	0	0		9			1			REMIND		0
'Energy Service|Transportation|Freight'	12	0	0	0	1	0	22	0	0	24	78	0	29		166			6			REMIND		REMIND
'Energy Service|Transportation|Freight|Aviation'	12	0	0	0	0	0	8	0	0	0	0	0	0		20			2			AIM		AIM
'Energy Service|Transportation|Freight|International Shipping'	12	0	0	0	0	0	8	0	0	0	9	0	0		29			3			AIM		AIM
'Energy Service|Transportation|Freight|Navigation'	12	0	0	0	0	0	8	0	0	0	9	0	0		29			3			AIM		AIM
'Energy Service|Transportation|Freight|Railways'	12	0	0	0	0	0	17	0	0	0	9	0	0		38			3			IMAGE		IMAGE
'Energy Service|Transportation|Freight|Road'	12	0	0	0	0	0	17	0	0	0	9	0	29		67			4			WITCH		WITCH
'Energy Service|Transportation|Navigation'	0	0	0	0	0	0	0	0	0	0	9	0	0		9			1			REMIND		0
'Energy Service|Transportation|Passenger'	12	0	0	0	1	0	22	0	0	24	78	0	29		166			6			REMIND		REMIND
'Energy Service|Transportation|Passenger|Aviation'	12	0	0	0	0	0	17	0	0	0	9	0	0		38			3			IMAGE		IMAGE
'Energy Service|Transportation|Passenger|Bicycling and Walking'	0	0	0	0	0	0	8	0	0	0	9	0	0		17			2			REMIND		REMIND
'Energy Service|Transportation|Passenger|Railways'	12	0	0	0	0	0	17	0	0	0	9	0	0		38			3			IMAGE		IMAGE
'Energy Service|Transportation|Passenger|Road'	12	0	0	0	0	0	17	0	0	0	9	0	29		67			4			WITCH		WITCH
'Energy Service|Transportation|Passenger|Road|2W and 3W'	0	0	0	0	0	0	0	0	0	0	0	0	0		0			0			0		0
'Energy Service|Transportation|Passenger|Road|Bus'	12	0	0	0	0	0	8	0	0	0	9	0	0		29			3			AIM		AIM
'Energy Service|Transportation|Passenger|Road|LDV'	12	0	0	0	0	0	8	0	0	0	63	0	0		83			3			REMIND		REMIND
'Energy Service|Transportation|Rail'	0	0	0	0	0	0	0	0	0	0	9	0	0		9			1			REMIND		0
'Energy Service|Transportation|Road'	0	0	0	0	0	0	0	0	0	0	9	0	0		9			1			REMIND		0
'Eutrophication|Marine|Electricity'	1	0	0	0	0	0	1	0	0	0	0	0	0		2			2			AIM		AIM
'Expenditure|Energy|Fossil'	0	0	0	0	0	0	0	0	0	0	0	0	0		0			0			0		0
'Expenditure|Medical System|Incremental'	0	0	0	0	0	12	0	0	0	0	0	0	0		12			1			GEM-E3		0
'Expenditure|RnD'	0	0	0	0	0	0	0	0	0	0	0	0	29		29			1			WITCH		0
'Expenditure|government'	0	0	0	0	0	0	0	0	0	0	0	0	0		0			0			0		0
'Expenditure|household'	0	0	0	0	0	12	0	0	0	0	0	0	0		12			1			GEM-E3		0
'Expenditure|household|Energy'	0	0	0	0	0	12	0	0	0	0	0	0	0		12			1			GEM-E3		0
'Expenditure|household|Food'	0	0	0	0	0	12	0	0	0	0	36	0	0		48			2			REMIND		REMIND
'Expenditure|household|Industry'	0	0	0	0	0	0	0	0	0	0	0	0	0		0			0			0		0
'Expenditure|household|Services'	0	0	0	0	0	12	0	0	0	0	0	0	0		12			1			GEM-E3		0
'Expenditure|household|Services|health'	0	0	0	0	0	0	0	0	0	0	0	0	0		0			0			0		0
'Export'	0	0	0	0	0	0	0	0	0	0	0	0	0		0			0			0		0
'Export|Agriculture'	0	0	0	0	0	0	0	0	0	0	0	0	0		0			0			0		0
'Export|Energy'	0	0	0	0	0	0	0	0	0	0	0	0	29		29			1			WITCH		0
'Export|Industry'	0	0	0	0	0	0	0	0	0	0	0	0	0		0			0			0		0
'Export|Industry|Energy'	0	0	0	0	0	0	0	0	0	0	0	0	0		0			0			0		0
'Export|Industry|Energy Intensive'	0	0	0	0	0	0	0	0	0	0	0	0	0		0			0			0		0
'Export|Industry|Manufacturing'	0	0	0	0	0	0	0	0	0	0	0	0	0		0			0			0		0
'Export|Other'	0	0	0	0	0	0	0	0	0	0	0	0	0		0			0			0		0
'Fertilizer Use|Nitrogen'	15	0	0	0	0	0	19	0	48	18	35	0	0		135			5			MESSAGE		MESSAGE
'Fertilizer Use|Phosphorus'	0	0	0	0	0	0	0	0	48	0	0	0	0		48			1			MESSAGE		0
'Final Energy'	17	0	14	0	13	12	34	0	59	26	84	20	31		310			10			REMIND		REMIND
'Final Energy (excl. feedstocks)|Industry'	0	0	0	0	0	0	8	0	0	0	0	0	0		8			1			IMAGE		0
'Final Energy (excl. feedstocks)|Industry|Electricity'	0	0	0	0	0	0	8	0	0	0	0	0	0		8			1			IMAGE		0
'Final Energy (excl. feedstocks)|Industry|Gases'	0	0	0	0	0	0	8	0	0	0	0	0	0		8			1			IMAGE		0
'Final Energy (excl. feedstocks)|Industry|Gases|Bioenergy'	0	0	0	0	0	0	0	0	0	0	0	0	0		0			0			0		0
'Final Energy (excl. feedstocks)|Industry|Gases|Fossil'	0	0	0	0	0	0	8	0	0	0	0	0	0		8			1			IMAGE		0
'Final Energy (excl. feedstocks)|Industry|Gases|Hydrogen synfuel'	0	0	0	0	0	0	0	0	0	0	0	0	0		0			0			0		0
'Final Energy (excl. feedstocks)|Industry|Heat'	0	0	0	0	0	0	8	0	0	0	0	0	0		8			1			IMAGE		0
'Final Energy (excl. feedstocks)|Industry|Hydrogen'	0	0	0	0	0	0	8	0	0	0	0	0	0		8			1			IMAGE		0
'Final Energy (excl. feedstocks)|Industry|Liquids'	0	0	0	0	0	0	8	0	0	0	0	0	0		8			1			IMAGE		0
'Final Energy (excl. feedstocks)|Industry|Liquids|Bioenergy'	0	0	0	0	0	0	8	0	0	0	0	0	0		8			1			IMAGE		0
'Final Energy (excl. feedstocks)|Industry|Liquids|Fossil'	0	0	0	0	0	0	8	0	0	0	0	0	0		8			1			IMAGE		0
'Final Energy (excl. feedstocks)|Industry|Liquids|Hydrogen synfuel'	0	0	0	0	0	0	0	0	0	0	0	0	0		0			0			0		0
'Final Energy (excl. feedstocks)|Industry|Other'	0	0	0	0	0	0	0	0	0	0	0	0	0		0			0			0		0
'Final Energy (excl. feedstocks)|Industry|Solids'	0	0	0	0	0	0	8	0	0	0	0	0	0		8			1			IMAGE		0
'Final Energy (excl. feedstocks)|Industry|Solids|Bioenergy'	0	0	0	0	0	0	8	0	0	0	0	0	0		8			1			IMAGE		0
'Final Energy (excl. feedstocks)|Industry|Solids|Fossil'	0	0	0	0	0	0	8	0	0	0	0	0	0		8			1			IMAGE		0
'Final Energy|Electricity'	17	0	14	0	13	12	34	0	54	26	84	20	31		305			10			REMIND		REMIND
'Final Energy|Gases'	17	0	14	0	13	12	34	0	54	26	84	20	31		305			10			REMIND		REMIND
'Final Energy|Geothermal'	14	0	0	0	0	0	12	0	48	2	36	20	2		134			7			MESSAGE		MESSAGE
'Final Energy|Heat'	17	0	0	0	13	12	34	0	54	26	84	20	2		262			9			REMIND		REMIND
'Final Energy|Hydrogen'	14	0	14	0	13	12	34	0	54	26	84	20	29		300			10			REMIND		REMIND
'Final Energy|Industry'	17	0	14	0	13	12	32	0	57	24	74	20	31		294			10			REMIND		REMIND
'Final Energy|Industry|Cement|Electricity'	0	0	0	0	0	0	8	0	0	0	3	0	0		11			2			IMAGE		IMAGE
'Final Energy|Industry|Cement|Gases'	0	0	0	0	0	0	8	0	0	0	3	0	0		11			2			IMAGE		IMAGE
'Final Energy|Industry|Cement|Gases|Bioenergy'	0	0	0	0	0	0	0	0	0	0	0	0	0		0			0			0		0
'Final Energy|Industry|Cement|Gases|Fossil'	0	0	0	0	0	0	0	0	0	0	0	0	0		0			0			0		0
'Final Energy|Industry|Cement|Gases|Hydrogen synfuel'	0	0	0	0	0	0	0	0	0	0	0	0	0		0			0			0		0
'Final Energy|Industry|Cement|Heat'	0	0	0	0	0	0	8	0	0	0	3	0	0		11			2			IMAGE		IMAGE
'Final Energy|Industry|Cement|Hydrogen'	0	0	0	0	0	0	8	0	0	0	3	0	0		11			2			IMAGE		IMAGE
'Final Energy|Industry|Cement|Liquids'	0	0	0	0	0	0	8	0	0	0	3	0	0		11			2			IMAGE		IMAGE
'Final Energy|Industry|Cement|Liquids|Bioenergy'	0	0	0	0	0	0	0	0	0	0	0	0	0		0			0			0		0
'Final Energy|Industry|Cement|Liquids|Fossil'	0	0	0	0	0	0	8	0	0	0	0	0	0		8			1			IMAGE		0
'Final Energy|Industry|Cement|Liquids|Hydrogen synfuel'	0	0	0	0	0	0	0	0	0	0	0	0	0		0			0			0		0
'Final Energy|Industry|Cement|Other'	0	0	0	0	0	0	0	0	0	0	0	0	0		0			0			0		0
'Final Energy|Industry|Cement|Solids'	0	0	0	0	0	0	8	0	0	0	3	0	0		11			2			IMAGE		IMAGE
'Final Energy|Industry|Cement|Solids|Bioenergy'	0	0	0	0	0	0	8	0	0	0	0	0	0		8			1			IMAGE		0
'Final Energy|Industry|Cement|Solids|Fossil'	0	0	0	0	0	0	8	0	0	0	0	0	0		8			1			IMAGE		0
'Final Energy|Industry|Chemicals|Ammonia|Electricity'	0	0	0	0	0	0	8	0	0	0	0	0	0		8			1			IMAGE		0
'Final Energy|Industry|Chemicals|Ammonia|Gases'	0	0	0	0	0	0	8	0	0	0	0	0	0		8			1			IMAGE		0
'Final Energy|Industry|Chemicals|Ammonia|Gases|Bioenergy'	0	0	0	0	0	0	0	0	0	0	0	0	0		0			0			0		0
'Final Energy|Industry|Chemicals|Ammonia|Gases|Fossil'	0	0	0	0	0	0	8	0	0	0	0	0	0		8			1			IMAGE		0
'Final Energy|Industry|Chemicals|Ammonia|Heat'	0	0	0	0	0	0	0	0	0	0	0	0	0		0			0			0		0
'Final Energy|Industry|Chemicals|Ammonia|Hydrogen'	0	0	0	0	0	0	0	0	0	0	0	0	0		0			0			0		0
'Final Energy|Industry|Chemicals|Ammonia|Liquids'	0	0	0	0	0	0	8	0	0	0	0	0	0		8			1			IMAGE		0
'Final Energy|Industry|Chemicals|Ammonia|Liquids|Bioenergy'	0	0	0	0	0	0	8	0	0	0	0	0	0		8			1			IMAGE		0
'Final Energy|Industry|Chemicals|Ammonia|Liquids|Fossil'	0	0	0	0	0	0	8	0	0	0	0	0	0		8			1			IMAGE		0
'Final Energy|Industry|Chemicals|Ammonia|Other'	0	0	0	0	0	0	8	0	0	0	0	0	0		8			1			IMAGE		0
'Final Energy|Industry|Chemicals|Ammonia|Solids'	0	0	0	0	0	0	8	0	0	0	0	0	0		8			1			IMAGE		0
'Final Energy|Industry|Chemicals|Ammonia|Solids|Bioenergy'	0	0	0	0	0	0	8	0	0	0	0	0	0		8			1			IMAGE		0
'Final Energy|Industry|Chemicals|Ammonia|Solids|Fossil'	0	0	0	0	0	0	8	0	0	0	0	0	0		8			1			IMAGE		0
'Final Energy|Industry|Chemicals|Electricity'	0	0	0	0	0	0	8	0	0	0	3	0	0		11			2			IMAGE		IMAGE
'Final Energy|Industry|Chemicals|Gases'	0	0	0	0	0	0	8	0	0	0	3	0	0		11			2			IMAGE		IMAGE
'Final Energy|Industry|Chemicals|Gases|Bioenergy'	0	0	0	0	0	0	0	0	0	0	0	0	0		0			0			0		0
'Final Energy|Industry|Chemicals|Gases|Fossil'	0	0	0	0	0	0	0	0	0	0	0	0	0		0			0			0		0
'Final Energy|Industry|Chemicals|Gases|Hydrogen synfuel'	0	0	0	0	0	0	0	0	0	0	0	0	0		0			0			0		0
'Final Energy|Industry|Chemicals|Heat'	0	0	0	0	0	0	0	0	0	0	3	0	0		3			1			REMIND		0
'Final Energy|Industry|Chemicals|High value chemicals|Electricity'	0	0	0	0	0	0	8	0	0	0	0	0	0		8			1			IMAGE		0
'Final Energy|Industry|Chemicals|High value chemicals|Gases'	0	0	0	0	0	0	8	0	0	0	0	0	0		8			1			IMAGE		0
'Final Energy|Industry|Chemicals|High value chemicals|Gases|Fossil'	0	0	0	0	0	0	8	0	0	0	0	0	0		8			1			IMAGE		0
'Final Energy|Industry|Chemicals|High value chemicals|Liquids'	0	0	0	0	0	0	8	0	0	0	0	0	0		8			1			IMAGE		0
'Final Energy|Industry|Chemicals|High value chemicals|Liquids|Bioenergy'	0	0	0	0	0	0	8	0	0	0	0	0	0		8			1			IMAGE		0
'Final Energy|Industry|Chemicals|High value chemicals|Liquids|Fossil'	0	0	0	0	0	0	8	0	0	0	0	0	0		8			1			IMAGE		0
'Final Energy|Industry|Chemicals|High value chemicals|Solids'	0	0	0	0	0	0	8	0	0	0	0	0	0		8			1			IMAGE		0
'Final Energy|Industry|Chemicals|High value chemicals|Solids|Bioenergy'	0	0	0	0	0	0	8	0	0	0	0	0	0		8			1			IMAGE		0
'Final Energy|Industry|Chemicals|High value chemicals|Solids|Fossil'	0	0	0	0	0	0	8	0	0	0	0	0	0		8			1			IMAGE		0
'Final Energy|Industry|Chemicals|Hydrogen'	0	0	0	0	0	0	0	0	0	0	3	0	0		3			1			REMIND		0
'Final Energy|Industry|Chemicals|Liquids'	0	0	0	0	0	0	8	0	0	0	3	0	0		11			2			IMAGE		IMAGE
'Final Energy|Industry|Chemicals|Liquids|Bioenergy'	0	0	0	0	0	0	8	0	0	0	0	0	0		8			1			IMAGE		0
'Final Energy|Industry|Chemicals|Liquids|Fossil'	0	0	0	0	0	0	8	0	0	0	0	0	0		8			1			IMAGE		0
'Final Energy|Industry|Chemicals|Liquids|Hydrogen synfuel'	0	0	0	0	0	0	0	0	0	0	0	0	0		0			0			0		0
'Final Energy|Industry|Chemicals|Other'	0	0	0	0	0	0	0	0	0	0	0	0	0		0			0			0		0
'Final Energy|Industry|Chemicals|Solids'	0	0	0	0	0	0	8	0	0	0	3	0	0		11			2			IMAGE		IMAGE
'Final Energy|Industry|Chemicals|Solids|Bioenergy'	0	0	0	0	0	0	8	0	0	0	0	0	0		8			1			IMAGE		0
'Final Energy|Industry|Chemicals|Solids|Fossil'	0	0	0	0	0	0	8	0	0	0	0	0	0		8			1			IMAGE		0
'Final Energy|Industry|Electricity'	14	0	14	0	13	12	29	0	58	26	74	20	29		289			10			REMIND		REMIND
'Final Energy|Industry|Gases'	14	0	14	0	13	12	29	0	58	26	74	20	29		289			10			REMIND		REMIND
'Final Energy|Industry|Gases|'	0	0	0	0	0	0	0	0	0	0	0	0	0		0			0			0		0
'Final Energy|Industry|Gases|Bioenergy'	0	0	0	0	0	0	0	0	0	0	42	0	0		42			1			REMIND		0
'Final Energy|Industry|Gases|Fossil'	0	0	0	0	0	0	0	0	0	0	0	0	0		0			0			0		0
'Final Energy|Industry|Gases|Hydrogen synfuel'	0	0	0	0	0	0	0	0	0	0	0	0	0		0			0			0		0
'Final Energy|Industry|Heat'	14	0	0	0	13	0	25	0	58	26	71	20	0		227			7			REMIND		REMIND
'Final Energy|Industry|Hydrogen'	13	0	14	0	13	12	29	0	58	26	74	20	0		259			9			REMIND		REMIND
'Final Energy|Industry|Liquids'	14	0	14	0	13	12	29	0	58	26	74	20	29		289			10			REMIND		REMIND
'Final Energy|Industry|Liquids|'	0	0	0	0	0	0	0	0	0	0	0	0	0		0			0			0		0
'Final Energy|Industry|Liquids|Bioenergy'	0	0	0	0	0	0	0	0	0	0	0	0	0		0			0			0		0
'Final Energy|Industry|Liquids|Fossil'	0	0	0	0	0	0	0	0	0	0	0	0	0		0			0			0		0
'Final Energy|Industry|Liquids|Hydrogen synfuel'	0	0	0	0	0	0	0	0	0	0	0	0	0		0			0			0		0
'Final Energy|Industry|Liquids|Oil'	1	0	0	0	0	0	0	0	5	0	0	0	0		6			2			MESSAGE		MESSAGE
'Final Energy|Industry|Other'	0	0	0	0	0	12	1	0	58	26	0	20	0		117			5			MESSAGE		MESSAGE
'Final Energy|Industry|Other|Electricity'	0	0	0	0	0	0	8	0	0	0	3	0	0		11			2			IMAGE		IMAGE
'Final Energy|Industry|Other|Gases'	0	0	0	0	0	0	8	0	0	0	3	0	0		11			2			IMAGE		IMAGE
'Final Energy|Industry|Other|Gases|Fossil'	0	0	0	0	0	0	8	0	0	0	0	0	0		8			1			IMAGE		0
'Final Energy|Industry|Other|Heat'	0	0	0	0	0	0	8	0	0	0	3	0	0		11			2			IMAGE		IMAGE
'Final Energy|Industry|Other|Hydrogen'	0	0	0	0	0	0	8	0	0	0	3	0	0		11			2			IMAGE		IMAGE
'Final Energy|Industry|Other|Liquids'	0	0	0	0	0	0	8	0	0	0	3	0	0		11			2			IMAGE		IMAGE
'Final Energy|Industry|Other|Liquids|Bioenergy'	0	0	0	0	0	0	8	0	0	0	0	0	0		8			1			IMAGE		0
'Final Energy|Industry|Other|Liquids|Fossil'	0	0	0	0	0	0	8	0	0	0	0	0	0		8			1			IMAGE		0
'Final Energy|Industry|Other|Solids'	0	0	0	0	0	0	8	0	0	0	3	0	0		11			2			IMAGE		IMAGE
'Final Energy|Industry|Other|Solids|Bioenergy'	0	0	0	0	0	0	8	0	0	0	0	0	0		8			1			IMAGE		0
'Final Energy|Industry|Other|Solids|Fossil'	0	0	0	0	0	0	8	0	0	0	0	0	0		8			1			IMAGE		0
'Final Energy|Industry|Solids'	14	0	14	0	13	12	29	0	58	26	74	20	29		289			10			REMIND		REMIND
'Final Energy|Industry|Solids|Biomass'	14	0	14	0	13	0	24	0	50	20	73	20	29		257			9			REMIND		REMIND
'Final Energy|Industry|Solids|Coal'	14	0	14	0	13	0	24	0	50	20	73	20	29		257			9			REMIND		REMIND
'Final Energy|Industry|Steel|Electricity'	0	0	0	0	0	0	8	0	0	0	3	0	0		11			2			IMAGE		IMAGE
'Final Energy|Industry|Steel|Gases'	0	0	0	0	0	0	8	0	0	0	3	0	0		11			2			IMAGE		IMAGE
'Final Energy|Industry|Steel|Gases|Bioenergy'	0	0	0	0	0	0	0	0	0	0	0	0	0		0			0			0		0
'Final Energy|Industry|Steel|Gases|Fossil'	0	0	0	0	0	0	0	0	0	0	0	0	0		0			0			0		0
'Final Energy|Industry|Steel|Gases|Hydrogen synfuel'	0	0	0	0	0	0	0	0	0	0	0	0	0		0			0			0		0
'Final Energy|Industry|Steel|Heat'	0	0	0	0	0	0	8	0	0	0	7	0	0		15			2			IMAGE		IMAGE
'Final Energy|Industry|Steel|Hydrogen'	0	0	0	0	0	0	8	0	0	0	3	0	0		11			2			IMAGE		IMAGE
'Final Energy|Industry|Steel|Liquids'	0	0	0	0	0	0	8	0	0	0	3	0	0		11			2			IMAGE		IMAGE
'Final Energy|Industry|Steel|Liquids|Bioenergy'	0	0	0	0	0	0	0	0	0	0	0	0	0		0			0			0		0
'Final Energy|Industry|Steel|Liquids|Fossil'	0	0	0	0	0	0	8	0	0	0	0	0	0		8			1			IMAGE		0
'Final Energy|Industry|Steel|Liquids|Hydrogen synfuel'	0	0	0	0	0	0	0	0	0	0	0	0	0		0			0			0		0
'Final Energy|Industry|Steel|Other'	0	0	0	0	0	0	0	0	0	0	0	0	0		0			0			0		0
'Final Energy|Industry|Steel|Solids'	0	0	0	0	0	0	8	0	0	0	3	0	0		11			2			IMAGE		IMAGE
'Final Energy|Industry|Steel|Solids|Bioenergy'	0	0	0	0	0	0	8	0	0	0	0	0	0		8			1			IMAGE		0
'Final Energy|Industry|Steel|Solids|Fossil'	0	0	0	0	0	0	8	0	0	0	0	0	0		8			1			IMAGE		0
'Final Energy|Liquids'	17	0	14	0	13	12	34	0	54	26	84	20	31		305			10			REMIND		REMIND
'Final Energy|Non-Energy Use'	14	0	0	0	13	12	17	0	48	0	0	20	2		126			7			MESSAGE		MESSAGE
'Final Energy|Non-Energy Use|Biomass'	13	0	0	0	13	12	17	0	48	0	0	20	0		123			6			MESSAGE		MESSAGE
'Final Energy|Non-Energy Use|Coal'	13	0	0	0	13	12	17	0	48	0	0	20	29		152			7			MESSAGE		MESSAGE
'Final Energy|Non-Energy Use|Gas'	14	0	0	0	13	12	17	0	48	0	0	20	0		124			6			MESSAGE		MESSAGE
'Final Energy|Non-Energy Use|Oil'	14	0	0	0	13	12	17	0	48	0	0	20	2		126			7			MESSAGE		MESSAGE
'Final Energy|Other'	0	0	0	0	0	12	0	0	0	18	0	0	0		30			2			POLES		POLES
'Final Energy|Other Sector'	14	0	14	0	0	0	18	0	0	18	70	0	0		134			5			REMIND		REMIND
'Final Energy|Other Sector|Electricity'	14	0	14	0	0	0	18	0	0	18	70	0	0		134			5			REMIND		REMIND
'Final Energy|Other Sector|Gases'	14	0	14	0	0	0	18	0	0	18	70	0	0		134			5			REMIND		REMIND
'Final Energy|Other Sector|Heat'	14	0	0	0	0	0	18	0	0	18	0	0	0		50			3			IMAGE		IMAGE
'Final Energy|Other Sector|Hydrogen'	0	0	14	0	0	0	18	0	0	18	70	0	0		120			4			REMIND		REMIND
'Final Energy|Other Sector|Liquids'	14	0	14	0	0	0	18	0	0	18	70	0	0		134			5			REMIND		REMIND
'Final Energy|Other Sector|Other'	0	0	0	0	0	0	0	0	0	18	0	0	0		18			1			POLES		0
'Final Energy|Other Sector|Solids'	14	0	14	0	0	0	18	0	0	18	0	0	0		64			4			IMAGE		IMAGE
'Final Energy|Other Sector|Solids|Biomass'	12	0	14	0	0	0	18	0	0	0	0	0	0		44			3			IMAGE		IMAGE
'Final Energy|Other Sector|Solids|Biomass|Traditional'	0	0	0	0	0	0	18	0	0	0	0	0	0		18			1			IMAGE		0
'Final Energy|Other Sector|Solids|Coal'	14	0	14	0	0	0	18	0	0	0	0	0	0		46			3			IMAGE		IMAGE
'Final Energy|Residential and Commercial'	17	0	14	0	13	12	34	0	53	20	72	20	31		286			10			REMIND		REMIND
'Final Energy|Residential and Commercial|Appliances'	0	0	0	0	0	0	8	0	0	0	0	0	0		8			1			IMAGE		0
'Final Energy|Residential and Commercial|Commercial'	13	0	13	0	0	12	17	0	0	0	0	0	28		83			5			WITCH		WITCH
'Final Energy|Residential and Commercial|Commercial|Appliances'	0	0	0	0	0	0	8	0	0	0	0	0	0		8			1			IMAGE		0
'Final Energy|Residential and Commercial|Commercial|Cooling'	0	0	0	0	1	0	8	0	0	0	0	0	0		9			2			IMAGE		IMAGE
'Final Energy|Residential and Commercial|Commercial|Electricity'	13	0	13	0	1	0	8	0	0	0	0	0	28		63			5			WITCH		WITCH
'Final Energy|Residential and Commercial|Commercial|Gases'	13	0	13	0	1	0	17	0	0	0	0	0	28		72			5			WITCH		WITCH
'Final Energy|Residential and Commercial|Commercial|Heat'	13	0	0	0	1	0	17	0	0	0	0	0	0		31			3			IMAGE		IMAGE
'Final Energy|Residential and Commercial|Commercial|Heating'	0	0	0	0	0	0	8	0	0	0	0	0	0		8			1			IMAGE		0
'Final Energy|Residential and Commercial|Commercial|Heating|Cooking'	0	0	0	0	0	0	8	0	0	0	0	0	0		8			1			IMAGE		0
'Final Energy|Residential and Commercial|Commercial|Heating|Space'	0	0	0	0	1	0	8	0	0	0	0	0	0		9			2			IMAGE		IMAGE
'Final Energy|Residential and Commercial|Commercial|Heating|Water'	0	0	0	0	0	0	8	0	0	0	0	0	0		8			1			IMAGE		0
'Final Energy|Residential and Commercial|Commercial|Hydrogen'	0	0	13	0	0	0	17	0	0	0	0	0	0		30			2			IMAGE		IMAGE
'Final Energy|Residential and Commercial|Commercial|Lighting'	0	0	0	0	0	0	8	0	0	0	0	0	0		8			1			IMAGE		0
'Final Energy|Residential and Commercial|Commercial|Liquids'	13	0	13	0	1	0	17	0	0	0	0	0	28		72			5			WITCH		WITCH
'Final Energy|Residential and Commercial|Commercial|Other'	0	0	0	0	0	0	0	0	0	0	0	0	0		0			0			0		0
'Final Energy|Residential and Commercial|Commercial|Solids'	13	0	13	0	1	0	17	0	0	0	0	0	28		72			5			WITCH		WITCH
'Final Energy|Residential and Commercial|Commercial|Solids|Biomass'	13	0	0	0	1	0	17	0	0	0	0	0	0		31			3			IMAGE		IMAGE
'Final Energy|Residential and Commercial|Commercial|Solids|Biomass|Traditional'	13	0	0	0	0	0	17	0	0	0	0	0	0		30			2			IMAGE		IMAGE
'Final Energy|Residential and Commercial|Commercial|Solids|Coal'	13	0	0	0	1	0	17	0	0	0	0	0	0		31			3			IMAGE		IMAGE
'Final Energy|Residential and Commercial|Commercial|Water|Desalination'	0	0	0	0	0	0	0	0	0	0	0	0	0		0			0			0		0
'Final Energy|Residential and Commercial|Cooling'	0	0	0	0	1	0	8	0	0	0	0	0	0		9			2			IMAGE		IMAGE
'Final Energy|Residential and Commercial|Electricity'	14	0	14	0	13	12	27	0	53	18	70	20	29		270			10			REMIND		REMIND
'Final Energy|Residential and Commercial|Gases'	14	0	14	0	13	12	27	0	53	18	70	20	29		270			10			REMIND		REMIND
'Final Energy|Residential and Commercial|Heat'	14	0	14	0	13	12	25	0	53	20	71	20	0		242			9			REMIND		REMIND
'Final Energy|Residential and Commercial|Heating'	0	0	0	0	0	0	8	0	0	0	0	0	0		8			1			IMAGE		0
'Final Energy|Residential and Commercial|Heating|Cooking'	0	0	0	0	0	0	8	0	0	0	0	0	0		8			1			IMAGE		0
'Final Energy|Residential and Commercial|Heating|Space'	0	0	0	0	1	0	8	0	0	0	0	0	0		9			2			IMAGE		IMAGE
'Final Energy|Residential and Commercial|Heating|Water'	0	0	0	0	0	0	8	0	0	0	0	0	0		8			1			IMAGE		0
'Final Energy|Residential and Commercial|Hydrogen'	13	0	14	0	0	12	27	0	53	18	70	20	0		227			8			REMIND		REMIND
'Final Energy|Residential and Commercial|Lighting'	0	0	0	0	0	0	8	0	0	0	0	0	0		8			1			IMAGE		0
'Final Energy|Residential and Commercial|Liquids'	14	0	14	0	13	12	27	0	53	18	70	20	29		270			10			REMIND		REMIND
'Final Energy|Residential and Commercial|Other'	0	0	14	0	0	12	0	0	53	18	0	20	0		117			5			MESSAGE		MESSAGE
'Final Energy|Residential and Commercial|Residential'	13	0	13	0	0	12	18	0	0	0	0	20	28		104			6			WITCH		WITCH
'Final Energy|Residential and Commercial|Residential|Appliances'	0	0	0	0	0	0	8	0	0	0	0	0	0		8			1			IMAGE		0
'Final Energy|Residential and Commercial|Residential|Cooling'	0	0	0	0	1	0	8	0	0	0	0	0	0		9			2			IMAGE		IMAGE
'Final Energy|Residential and Commercial|Residential|Electricity'	13	0	13	0	1	0	17	0	0	0	0	0	28		72			5			WITCH		WITCH
'Final Energy|Residential and Commercial|Residential|Gases'	13	0	13	0	1	0	17	0	0	0	0	0	28		72			5			WITCH		WITCH
'Final Energy|Residential and Commercial|Residential|Heat'	13	0	0	0	1	0	17	0	0	0	0	0	0		31			3			IMAGE		IMAGE
'Final Energy|Residential and Commercial|Residential|Heating'	0	0	0	0	0	0	8	0	0	0	0	0	0		8			1			IMAGE		0
'Final Energy|Residential and Commercial|Residential|Heating|Cooking'	0	0	0	0	0	0	8	0	0	0	0	0	0		8			1			IMAGE		0
'Final Energy|Residential and Commercial|Residential|Heating|Space'	0	0	0	0	1	0	8	0	0	0	0	0	0		9			2			IMAGE		IMAGE
'Final Energy|Residential and Commercial|Residential|Heating|Water'	0	0	0	0	0	0	8	0	0	0	0	0	0		8			1			IMAGE		0
'Final Energy|Residential and Commercial|Residential|Hydrogen'	0	0	13	0	0	0	17	0	0	0	0	0	0		30			2			IMAGE		IMAGE
'Final Energy|Residential and Commercial|Residential|Lighting'	0	0	0	0	0	0	8	0	0	0	0	0	0		8			1			IMAGE		0
'Final Energy|Residential and Commercial|Residential|Liquids'	13	0	13	0	1	0	17	0	0	0	0	0	28		72			5			WITCH		WITCH
'Final Energy|Residential and Commercial|Residential|Other'	0	0	0	0	0	0	0	0	0	0	0	0	0		0			0			0		0
'Final Energy|Residential and Commercial|Residential|Solids'	13	0	13	0	0	0	17	0	0	0	0	0	28		71			4			WITCH		WITCH
'Final Energy|Residential and Commercial|Residential|Solids|Biomass'	13	0	0	0	0	0	17	0	0	0	0	0	0		30			2			IMAGE		IMAGE
'Final Energy|Residential and Commercial|Residential|Solids|Biomass|Traditional'	13	0	0	0	0	0	17	0	0	0	0	0	0		30			2			IMAGE		IMAGE
'Final Energy|Residential and Commercial|Residential|Solids|Coal'	13	0	0	0	0	0	17	0	0	0	0	0	0		30			2			IMAGE		IMAGE
'Final Energy|Residential and Commercial|Solids'	14	0	14	0	13	12	23	0	53	18	70	20	29		266			10			REMIND		REMIND
'Final Energy|Residential and Commercial|Solids|Biomass'	14	0	0	0	13	12	22	0	48	18	70	20	29		246			9			REMIND		REMIND
'Final Energy|Residential and Commercial|Solids|Biomass|Traditional'	2	0	0	0	1	0	18	0	48	0	70	0	0		139			5			REMIND		REMIND
'Final Energy|Residential and Commercial|Solids|Coal'	14	0	0	0	13	12	22	0	48	18	70	20	29		246			9			REMIND		REMIND
'Final Energy|Solar'	14	0	14	0	0	0	23	0	54	26	1	20	2		154			8			MESSAGE		MESSAGE
'Final Energy|Solids'	17	0	14	0	13	12	34	0	54	26	84	20	31		305			10			REMIND		REMIND
'Final Energy|Solids|Biomass'	17	0	14	0	13	12	34	0	54	26	84	20	31		305			10			REMIND		REMIND
'Final Energy|Solids|Biomass|Traditional'	14	0	0	0	13	0	32	0	54	26	83	0	0		222			6			REMIND		REMIND
'Final Energy|Solids|Coal'	17	0	14	0	13	12	34	0	54	26	84	20	31		305			10			REMIND		REMIND
'Final Energy|Transportation'	17	0	14	0	13	12	34	0	59	26	84	20	31		310			10			REMIND		REMIND
'Final Energy|Transportation|Aviation'	1	0	0	0	0	0	0	0	0	0	0	0	0		1			1			AIM		0
'Final Energy|Transportation|Aviation|Freight'	0	0	0	0	0	0	8	0	0	0	0	0	0		8			1			IMAGE		0
'Final Energy|Transportation|Aviation|Passenger'	0	0	0	0	0	0	8	0	0	0	9	0	0		17			2			REMIND		REMIND
'Final Energy|Transportation|Electricity'	17	0	14	0	13	12	34	0	59	26	84	20	31		310			10			REMIND		REMIND
'Final Energy|Transportation|Freight'	13	0	14	0	13	12	26	0	0	24	52	20	29		203			9			REMIND		REMIND
'Final Energy|Transportation|Freight|Electricity'	13	0	14	0	1	0	11	0	0	0	9	0	29		77			6			WITCH		WITCH
'Final Energy|Transportation|Freight|Gases'	0	0	14	0	1	0	11	0	0	0	9	0	0		35			4			COFFEE		COFFEE
'Final Energy|Transportation|Freight|Gases|Bioenergy'	0	0	0	0	0	0	0	0	0	0	0	0	0		0			0			0		0
'Final Energy|Transportation|Freight|Gases|Fossil'	0	0	0	0	0	0	0	0	0	0	0	0	0		0			0			0		0
'Final Energy|Transportation|Freight|Hydrogen'	0	0	14	0	0	0	11	0	0	0	9	0	25		59			4			WITCH		WITCH
'Final Energy|Transportation|Freight|Liquids'	13	0	14	0	1	12	11	0	0	0	41	0	29		121			7			REMIND		REMIND
'Final Energy|Transportation|Freight|Liquids|Bioenergy'	13	0	14	0	0	12	11	0	0	0	70	0	29		149			6			REMIND		REMIND
'Final Energy|Transportation|Freight|Liquids|Fossil synfuel'	0	0	0	0	0	0	0	0	0	0	0	0	0		0			0			0		0
'Final Energy|Transportation|Freight|Liquids|Oil'	13	0	14	0	0	12	11	0	0	0	31	0	29		110			6			REMIND		REMIND
'Final Energy|Transportation|Freight|Other'	13	0	0	0	1	0	0	0	0	0	70	0	0		84			3			REMIND		REMIND
'Final Energy|Transportation|Gases'	14	0	14	0	13	12	27	0	56	24	70	20	29		279			10			REMIND		REMIND
'Final Energy|Transportation|Gases|Bioenergy'	0	0	0	0	0	0	0	0	0	0	9	0	0		9			1			REMIND		0
'Final Energy|Transportation|Gases|Fossil'	0	0	0	0	0	0	8	0	0	0	9	0	0		17			2			REMIND		REMIND
'Final Energy|Transportation|Hydrogen'	13	0	14	0	13	12	32	0	59	26	83	20	27		299			10			REMIND		REMIND
'Final Energy|Transportation|Liquids'	16	0	14	0	13	12	30	0	57	24	82	20	29		297			10			REMIND		REMIND
'Final Energy|Transportation|Liquids|Bioenergy'	13	0	14	0	0	0	9	0	48	18	70	0	29		201			7			REMIND		REMIND
'Final Energy|Transportation|Liquids|Coal'	0	0	0	0	0	12	18	0	48	18	70	0	0		166			5			REMIND		REMIND
'Final Energy|Transportation|Liquids|Fossil synfuel'	0	0	0	0	0	0	0	0	0	0	0	0	0		0			0			0		0
'Final Energy|Transportation|Liquids|Natural Gas'	0	0	0	0	0	0	18	0	0	18	0	0	0		36			2			IMAGE		IMAGE
'Final Energy|Transportation|Liquids|Oil'	14	0	14	0	0	12	29	0	53	26	82	0	29		259			8			REMIND		REMIND
'Final Energy|Transportation|Maritime'	0	0	0	0	0	0	0	0	0	0	9	0	0		9			1			REMIND		0
'Final Energy|Transportation|Other'	14	0	0	0	1	12	18	0	53	18	70	0	0		186			7			REMIND		REMIND
'Final Energy|Transportation|Passenger'	13	0	14	0	1	12	17	0	0	18	41	20	29		165			9			REMIND		REMIND
'Final Energy|Transportation|Passenger|Electricity'	13	0	14	0	1	12	8	0	0	0	70	0	29		147			7			REMIND		REMIND
'Final Energy|Transportation|Passenger|Gases'	0	0	14	0	1	0	8	0	0	0	9	0	0		32			4			COFFEE		COFFEE
'Final Energy|Transportation|Passenger|Gases|Bioenergy'	0	0	0	0	0	0	0	0	0	0	0	0	0		0			0			0		0
'Final Energy|Transportation|Passenger|Gases|Fossil'	0	0	0	0	0	0	8	0	0	0	0	0	0		8			1			IMAGE		0
'Final Energy|Transportation|Passenger|Hydrogen'	0	0	14	0	1	0	8	0	0	0	70	0	27		120			5			REMIND		REMIND
'Final Energy|Transportation|Passenger|Liquids'	13	0	14	0	1	12	8	0	0	0	41	0	29		118			7			REMIND		REMIND
'Final Energy|Transportation|Passenger|Liquids|Bioenergy'	13	0	14	0	0	12	0	0	0	0	70	0	29		138			5			REMIND		REMIND
'Final Energy|Transportation|Passenger|Liquids|Fossil synfuel'	0	0	0	0	0	0	0	0	0	0	0	0	0		0			0			0		0
'Final Energy|Transportation|Passenger|Liquids|Oil'	13	0	14	0	0	12	8	0	0	0	31	0	29		107			6			REMIND		REMIND
'Final Energy|Transportation|Passenger|Other'	13	0	0	0	0	0	0	0	0	0	70	0	0		83			2			REMIND		REMIND
'Final Energy|Transportation|Rail'	1	0	0	0	0	0	8	0	0	0	9	0	0		18			3			REMIND		REMIND
'Final Energy|Transportation|Rail|Freight'	0	0	0	0	0	0	8	0	0	0	9	0	0		17			2			REMIND		REMIND
'Final Energy|Transportation|Rail|Passenger'	0	0	0	0	0	0	8	0	0	0	9	0	0		17			2			REMIND		REMIND
'Final Energy|Transportation|Road|Freight'	0	0	0	0	1	0	8	0	0	0	9	0	0		18			3			REMIND		REMIND
'Final Energy|Transportation|Road|Freight|Electric'	0	0	0	0	1	0	0	0	0	0	9	0	0		10			2			REMIND		REMIND
'Final Energy|Transportation|Road|Freight|FC'	0	0	0	0	0	0	0	0	0	0	9	0	0		9			1			REMIND		0
'Final Energy|Transportation|Road|Freight|ICE'	0	0	0	0	0	0	0	0	0	0	9	0	0		9			1			REMIND		0
'Final Energy|Transportation|Road|Passenger'	0	0	0	0	1	0	8	0	0	0	9	0	0		18			3			REMIND		REMIND
'Final Energy|Transportation|Road|Passenger|2W&3W'	0	0	0	0	1	0	0	0	0	0	9	0	0		10			2			REMIND		REMIND
'Final Energy|Transportation|Road|Passenger|Bus'	0	0	0	0	0	0	8	0	0	0	9	0	0		17			2			REMIND		REMIND
'Final Energy|Transportation|Road|Passenger|LDV'	0	0	0	0	0	0	8	0	0	0	42	0	0		50			2			REMIND		REMIND
'Food Demand'	17	0	0	0	0	0	27	0	52	18	48	0	31		193			6			MESSAGE		MESSAGE
'Food Demand|Crops'	16	0	0	0	0	0	25	0	52	18	47	0	29		187			6			MESSAGE		MESSAGE
'Food Demand|Livestock'	16	0	0	0	0	0	25	0	52	18	47	0	29		187			6			MESSAGE		MESSAGE
'Food Energy Supply'	14	0	0	0	0	0	18	0	0	0	0	0	29		61			3			WITCH		WITCH
'Food Energy Supply|Livestock'	14	0	0	0	0	0	0	0	0	0	0	0	29		43			2			WITCH		WITCH
'Forcing'	12	0	0	0	13	0	24	0	2	0	67	20	0		138			6			REMIND		REMIND
'Forcing|Aerosol'	12	0	0	0	0	0	24	0	2	0	65	0	0		103			4			REMIND		REMIND
'Forcing|Aerosol|BC'	12	0	0	0	0	0	18	0	0	0	62	0	0		92			3			REMIND		REMIND
'Forcing|Aerosol|Black and Organic Carbon'	12	0	0	0	0	0	22	0	0	0	3	0	0		37			3			IMAGE		IMAGE
'Forcing|Aerosol|Cloud Indirect'	12	0	0	0	0	0	22	0	0	0	65	0	0		99			3			REMIND		REMIND
'Forcing|Aerosol|OC'	12	0	0	0	0	0	18	0	0	0	62	0	0		92			3			REMIND		REMIND
'Forcing|Aerosol|Other'	12	0	0	0	0	0	18	0	0	0	62	0	0		92			3			REMIND		REMIND
'Forcing|Aerosol|Sulfate Direct'	12	0	0	0	0	0	22	0	0	0	65	0	0		99			3			REMIND		REMIND
'Forcing|Albedo Change and Mineral Dust'	0	0	0	0	0	0	20	0	0	0	62	0	0		82			2			REMIND		REMIND
'Forcing|CH4'	12	0	0	0	0	0	24	0	2	0	65	0	0		103			4			REMIND		REMIND
'Forcing|CO2'	12	0	0	0	0	0	24	0	2	0	65	0	0		103			4			REMIND		REMIND
'Forcing|F-Gases'	12	0	0	0	0	0	20	0	2	0	62	0	0		96			4			REMIND		REMIND
'Forcing|Kyoto Gases'	12	0	0	0	0	0	24	0	2	0	70	0	0		108			4			REMIND		REMIND
'Forcing|Montreal Gases'	0	0	0	0	0	0	24	0	0	0	65	0	0		89			2			REMIND		REMIND
'Forcing|N2O'	12	0	0	0	0	0	24	0	2	0	65	0	0		103			4			REMIND		REMIND
'Forcing|Other'	12	0	0	0	0	0	22	0	0	0	65	0	0		99			3			REMIND		REMIND
'Forcing|Tropospheric Ozone'	12	0	0	0	0	0	24	0	2	0	65	0	0		103			4			REMIND		REMIND
'Forestry Demand|Roundwood'	14	0	0	0	0	0	18	0	48	0	0	0	0		80			3			MESSAGE		MESSAGE
'Forestry Demand|Roundwood|Industrial Roundwood'	14	0	0	0	0	0	18	0	48	0	0	0	0		80			3			MESSAGE		MESSAGE
'Forestry Demand|Roundwood|Wood Fuel'	14	0	0	0	0	0	18	0	48	0	0	0	0		80			3			MESSAGE		MESSAGE
'Forestry Production|Roundwood'	14	0	0	0	0	0	18	0	48	18	0	0	0		98			4			MESSAGE		MESSAGE
'Forestry Production|Roundwood|Industrial Roundwood'	14	0	0	0	0	0	18	0	48	0	0	0	0		80			3			MESSAGE		MESSAGE
'Forestry Production|Roundwood|Wood Fuel'	14	0	0	0	0	0	18	0	48	0	0	0	0		80			3			MESSAGE		MESSAGE
'GDP|MER'	15	0	0	1	13	12	31	0	58	26	83	0	31		270			9			REMIND		REMIND
'GDP|PPP'	16	0	13	0	13	0	29	0	59	26	80	0	31		267			8			REMIND		REMIND
'Human Toxicity|Electricity'	1	0	0	0	0	0	1	0	0	0	0	0	0		2			2			AIM		AIM
'Import'	0	0	0	0	0	0	0	0	0	0	0	0	0		0			0			0		0
'Import|Agriculture'	0	0	0	0	0	0	0	0	0	0	0	0	0		0			0			0		0
'Import|Energy'	0	0	0	0	0	0	0	0	0	0	0	0	29		29			1			WITCH		0
'Import|Industry'	0	0	0	0	0	0	0	0	0	0	0	0	0		0			0			0		0
'Import|Industry|Energy'	0	0	0	0	0	0	0	0	0	0	0	0	0		0			0			0		0
'Import|Industry|Energy Intensive'	0	0	0	0	0	0	0	0	0	0	0	0	0		0			0			0		0
'Import|Industry|Manufacturing'	0	0	0	0	0	0	0	0	0	0	0	0	0		0			0			0		0
'Import|Other'	0	0	0	0	0	0	0	0	0	0	0	0	0		0			0			0		0
'Interest Rate|Real'	0	0	0	0	0	0	0	0	0	0	66	0	3		69			2			REMIND		REMIND
'Investment'	0	0	14	0	0	12	12	0	0	0	70	0	29		137			5			REMIND		REMIND
'Investment|Energy Demand|Transportation|Freight|Road|HDT|EV'	0	0	0	0	0	0	0	0	0	0	0	0	29		29			1			WITCH		0
'Investment|Energy Demand|Transportation|Freight|Road|HDT|ICE'	0	0	0	0	0	0	0	0	0	0	0	0	29		29			1			WITCH		0
'Investment|Energy Demand|Transportation|Passenger|Road|LDV|EV'	0	0	0	0	0	0	0	0	0	2	0	0	29		31			2			WITCH		WITCH
'Investment|Energy Demand|Transportation|Passenger|Road|LDV|FCV'	0	0	0	0	0	0	0	0	0	0	0	0	27		27			1			WITCH		0
'Investment|Energy Demand|Transportation|Passenger|Road|LDV|ICE'	0	0	0	0	0	0	0	0	0	0	0	0	29		29			1			WITCH		0
'Investment|Energy Efficiency'	1	0	0	0	0	0	1	0	0	0	0	0	29		31			3			WITCH		WITCH
'Investment|Energy Supply'	15	0	14	0	1	12	24	0	53	20	78	0	29		246			9			REMIND		REMIND
'Investment|Energy Supply|CO2 Transport and Storage'	13	0	14	0	1	0	18	0	48	0	53	0	29		176			7			REMIND		REMIND
'Investment|Energy Supply|Electricity'	14	0	14	0	1	12	23	0	48	20	61	20	29		242			10			REMIND		REMIND
'Investment|Energy Supply|Electricity|Biomass'	14	0	0	0	1	12	18	0	48	18	50	20	29		210			9			REMIND		REMIND
'Investment|Energy Supply|Electricity|Biomass|w/ CCS'	15	0	0	0	1	12	19	0	48	18	50	20	29		212			9			REMIND		REMIND
'Investment|Energy Supply|Electricity|Biomass|w/o CCS'	15	0	0	0	1	12	19	0	48	18	50	20	29		212			9			REMIND		REMIND
'Investment|Energy Supply|Electricity|Coal'	14	0	0	0	1	12	18	0	48	18	50	20	29		210			9			REMIND		REMIND
'Investment|Energy Supply|Electricity|Coal|w/ CCS'	14	0	0	0	1	12	19	0	48	18	50	20	29		211			9			REMIND		REMIND
'Investment|Energy Supply|Electricity|Coal|w/o CCS'	15	0	0	0	1	12	19	0	48	18	50	20	29		212			9			REMIND		REMIND
'Investment|Energy Supply|Electricity|Electricity Storage'	14	0	0	0	1	0	0	0	48	16	50	0	29		158			6			REMIND		REMIND
'Investment|Energy Supply|Electricity|Fossil'	14	0	1	0	1	12	23	0	48	20	58	20	29		226			10			REMIND		REMIND
'Investment|Energy Supply|Electricity|Gas'	14	0	0	0	1	12	18	0	48	18	50	20	29		210			9			REMIND		REMIND
'Investment|Energy Supply|Electricity|Gas|w/ CCS'	15	0	0	0	1	12	19	0	48	18	50	20	29		212			9			REMIND		REMIND
'Investment|Energy Supply|Electricity|Gas|w/o CCS'	15	0	0	0	1	12	19	0	48	18	50	20	29		212			9			REMIND		REMIND
'Investment|Energy Supply|Electricity|Geothermal'	15	0	0	0	1	12	1	0	48	18	50	20	0		165			8			REMIND		REMIND
'Investment|Energy Supply|Electricity|Hydro'	15	0	0	0	1	12	19	0	48	18	50	20	29		212			9			REMIND		REMIND
'Investment|Energy Supply|Electricity|Non-Biomass Renewables'	15	0	0	0	1	12	19	0	48	18	50	20	29		212			9			REMIND		REMIND
'Investment|Energy Supply|Electricity|Non-fossil'	14	0	0	0	0	12	18	0	48	20	50	20	29		211			8			REMIND		REMIND
'Investment|Energy Supply|Electricity|Nuclear'	15	0	0	0	1	12	19	0	48	18	50	20	29		212			9			REMIND		REMIND
'Investment|Energy Supply|Electricity|Ocean'	0	0	0	0	0	0	0	0	0	18	0	0	0		18			1			POLES		0
'Investment|Energy Supply|Electricity|Oil'	14	0	0	0	1	12	18	0	48	18	0	20	29		160			8			MESSAGE		MESSAGE
'Investment|Energy Supply|Electricity|Oil|w/ CCS'	14	0	0	0	0	0	18	0	0	0	0	20	0		52			3			TIAM		TIAM
'Investment|Energy Supply|Electricity|Oil|w/o CCS'	15	0	0	0	1	12	19	0	48	18	50	20	29		212			9			REMIND		REMIND
'Investment|Energy Supply|Electricity|Other'	14	0	0	0	0	0	18	0	48	18	15	0	0		113			5			MESSAGE		MESSAGE
'Investment|Energy Supply|Electricity|Renewables (incl. Biomass)'	15	0	0	0	1	12	19	0	48	18	50	20	29		212			9			REMIND		REMIND
'Investment|Energy Supply|Electricity|Solar'	15	0	0	0	1	12	19	0	48	18	50	20	29		212			9			REMIND		REMIND
'Investment|Energy Supply|Electricity|Transmission and Distribution'	15	0	0	0	1	0	19	0	48	0	50	0	29		162			6			REMIND		REMIND
'Investment|Energy Supply|Electricity|Wind'	15	0	0	0	1	12	19	0	48	18	50	20	29		212			9			REMIND		REMIND
'Investment|Energy Supply|Extraction|Bioenergy'	14	0	0	0	0	0	18	0	0	18	0	0	0		50			3			IMAGE		IMAGE
'Investment|Energy Supply|Extraction|Coal'	14	0	14	0	1	0	18	0	48	18	0	0	0		113			6			MESSAGE		MESSAGE
'Investment|Energy Supply|Extraction|Fossil'	15	0	0	0	1	0	19	0	48	20	0	0	29		132			6			MESSAGE		MESSAGE
'Investment|Energy Supply|Extraction|Gas'	14	0	14	0	1	0	18	0	48	18	0	0	0		113			6			MESSAGE		MESSAGE
'Investment|Energy Supply|Extraction|Oil'	14	0	14	0	1	0	18	0	48	18	0	0	29		142			7			MESSAGE		MESSAGE
'Investment|Energy Supply|Extraction|Uranium'	0	0	14	0	0	0	18	0	48	0	0	0	0		80			3			MESSAGE		MESSAGE
'Investment|Energy Supply|Heat'	14	0	0	0	0	0	18	0	48	0	53	0	0		133			4			REMIND		REMIND
'Investment|Energy Supply|Hydrogen'	0	0	14	0	1	0	0	0	48	18	53	0	27		161			6			REMIND		REMIND
'Investment|Energy Supply|Hydrogen|Biomass'	0	0	0	0	0	0	0	0	0	0	15	0	0		15			1			REMIND		0
'Investment|Energy Supply|Hydrogen|Electricity'	0	0	0	0	0	0	0	0	0	0	9	0	0		9			1			REMIND		0
'Investment|Energy Supply|Hydrogen|Fossil'	1	0	0	0	0	0	4	0	48	18	50	20	27		168			7			REMIND		REMIND
'Investment|Energy Supply|Hydrogen|Other'	1	0	0	0	0	0	4	0	48	0	9	20	0		82			5			MESSAGE		MESSAGE
'Investment|Energy Supply|Hydrogen|Renewable'	0	0	0	0	0	0	3	0	48	18	35	20	27		151			6			MESSAGE		MESSAGE
'Investment|Energy Supply|Liquids'	14	0	14	0	0	0	18	0	48	18	53	0	0		165			6			REMIND		REMIND
'Investment|Energy Supply|Liquids|Biomass'	14	0	0	0	0	0	18	0	48	18	53	0	0		151			5			REMIND		REMIND
'Investment|Energy Supply|Liquids|Coal and Gas'	0	0	0	0	0	0	0	0	48	18	53	0	0		119			3			REMIND		REMIND
'Investment|Energy Supply|Liquids|Oil'	14	0	0	0	0	0	18	0	48	0	53	0	0		133			4			REMIND		REMIND
'Investment|Energy Supply|Other'	0	0	0	0	1	0	0	0	48	0	18	0	0		67			3			MESSAGE		MESSAGE
'Investment|Infrastructure|Residential and Commercial|Building Retrofits'	0	0	0	0	0	0	0	0	0	2	0	0	0		2			1			POLES		0
'Investment|Infrastructure|Residential and Commercial|High-Efficiency Buildings'	0	0	0	0	0	0	0	0	0	0	0	0	0		0			0			0		0
'Investment|Infrastructure|Transportation'	0	0	0	0	0	0	0	0	0	0	0	0	26		26			1			WITCH		0
'Investment|RnD|Energy Supply'	0	0	0	0	0	0	0	0	0	0	0	0	29		29			1			WITCH		0
'Land Cover'	15	0	14	0	1	0	27	0	58	26	47	0	31		219			8			MESSAGE		MESSAGE
'Land Cover|Built-up Area'	17	0	0	0	13	0	28	0	0	24	48	0	0		130			5			REMIND		REMIND
'Land Cover|Cropland'	17	0	14	0	13	0	30	0	59	20	48	0	31		232			8			MESSAGE		MESSAGE
'Land Cover|Cropland|Cereals'	2	0	0	0	0	0	18	0	0	18	38	0	29		105			5			REMIND		REMIND
'Land Cover|Cropland|Energy Crops'	16	0	0	0	13	0	28	0	54	18	44	0	29		202			7			MESSAGE		MESSAGE
'Land Cover|Cropland|Energy Crops|2nd generation'	0	0	0	0	0	0	0	0	0	0	8	0	0		8			1			REMIND		0
'Land Cover|Cropland|Energy Crops|Irrigated'	0	0	0	0	0	0	18	0	0	0	36	0	0		54			2			REMIND		REMIND
'Land Cover|Cropland|Irrigated'	12	0	0	0	0	0	18	0	48	18	38	0	29		163			6			MESSAGE		MESSAGE
'Land Cover|Cropland|Rainfed'	12	0	0	0	0	0	10	0	0	18	38	0	0		78			4			REMIND		REMIND
'Land Cover|Forest'	17	0	14	0	13	0	30	0	59	26	48	0	31		238			8			MESSAGE		MESSAGE
'Land Cover|Forest|Afforestation and Reforestation'	0	0	0	0	0	0	18	0	48	0	35	0	29		130			4			MESSAGE		MESSAGE
'Land Cover|Forest|Forestry|Harvested Area'	14	0	0	0	0	0	18	0	0	2	0	0	0		34			3			IMAGE		IMAGE
'Land Cover|Forest|Managed'	0	0	0	0	13	0	20	0	0	18	35	0	29		115			5			REMIND		REMIND
'Land Cover|Forest|Natural Forest'	14	0	0	0	13	0	18	0	48	18	38	0	29		178			7			MESSAGE		MESSAGE
'Land Cover|Forest|Secondary'	0	0	0	0	0	0	0	0	0	0	8	0	0		8			1			REMIND		0
'Land Cover|Other Arable Land'	14	0	0	0	1	0	20	0	0	18	0	0	0		53			4			IMAGE		IMAGE
'Land Cover|Other Land'	14	0	14	0	13	0	18	0	53	18	38	0	29		197			8			MESSAGE		MESSAGE
'Land Cover|Pasture'	17	0	14	0	13	0	30	0	59	20	48	0	31		232			8			MESSAGE		MESSAGE
'Lifetime|Electricity|Biomass|w/ CCS'	0	0	0	0	0	0	9	0	0	18	66	0	29		122			4			REMIND		REMIND
'Lifetime|Electricity|Biomass|w/o CCS'	0	0	0	0	0	0	0	0	0	18	66	0	29		113			3			REMIND		REMIND
'Lifetime|Electricity|Coal|w/ CCS'	0	0	0	0	0	0	9	0	0	18	66	0	29		122			4			REMIND		REMIND
'Lifetime|Electricity|Coal|w/o CCS'	0	0	0	0	0	0	0	0	0	18	66	0	29		113			3			REMIND		REMIND
'Lifetime|Electricity|Gas|w/ CCS'	0	0	0	0	0	0	9	0	0	18	66	0	29		122			4			REMIND		REMIND
'Lifetime|Electricity|Gas|w/o CCS'	0	0	0	0	0	0	0	0	0	18	66	0	29		113			3			REMIND		REMIND
'Lifetime|Electricity|Geothermal'	0	0	0	0	0	0	0	0	46	18	66	0	0		130			3			REMIND		REMIND
'Lifetime|Electricity|Hydro'	0	0	0	0	0	0	9	0	46	18	66	0	29		168			5			REMIND		REMIND
'Lifetime|Electricity|Nuclear'	0	0	0	0	0	0	9	0	46	18	66	0	29		168			5			REMIND		REMIND
'Lifetime|Electricity|Solar|CSP'	0	0	0	0	0	0	9	0	0	18	66	0	29		122			4			REMIND		REMIND
'Lifetime|Electricity|Solar|PV'	0	0	0	0	0	0	9	0	46	18	66	0	29		168			5			REMIND		REMIND
'Lifetime|Electricity|Wind'	0	0	0	0	0	0	0	0	0	18	66	0	29		113			3			REMIND		REMIND
'Lifetime|Electricity|Wind|Offshore'	0	0	0	0	0	0	9	0	46	18	0	0	29		102			4			MESSAGE		MESSAGE
'Lifetime|Electricity|Wind|Onshore'	0	0	0	0	0	0	9	0	46	18	0	0	29		102			4			MESSAGE		MESSAGE
'Lifetime|Gases|Biomass|w/o CCS'	0	0	0	0	0	0	0	0	46	0	66	0	0		112			2			REMIND		REMIND
'Lifetime|Gases|Coal|w/o CCS'	0	0	0	0	0	0	0	0	46	0	66	0	0		112			2			REMIND		REMIND
'Lifetime|Hydrogen|Biomass|w/ CCS'	0	0	0	0	0	0	9	0	46	0	66	0	0		121			3			REMIND		REMIND
'Lifetime|Hydrogen|Biomass|w/o CCS'	0	0	0	0	0	0	9	0	46	0	66	0	0		121			3			REMIND		REMIND
'Lifetime|Hydrogen|Coal|w/ CCS'	0	0	0	0	0	0	9	0	46	0	66	0	0		121			3			REMIND		REMIND
'Lifetime|Hydrogen|Coal|w/o CCS'	0	0	0	0	0	0	9	0	46	0	66	0	0		121			3			REMIND		REMIND
'Lifetime|Hydrogen|Electricity'	0	0	0	0	0	0	9	0	45	0	66	0	0		120			3			REMIND		REMIND
'Lifetime|Hydrogen|Gas|w/ CCS'	0	0	0	0	0	0	9	0	46	0	66	0	0		121			3			REMIND		REMIND
'Lifetime|Hydrogen|Gas|w/o CCS'	0	0	0	0	0	0	0	0	46	0	66	0	0		112			2			REMIND		REMIND
'Lifetime|Liquids|Biomass|w/ CCS'	0	0	0	0	0	0	0	0	46	0	66	0	0		112			2			REMIND		REMIND
'Lifetime|Liquids|Biomass|w/o CCS'	0	0	0	0	0	0	0	0	46	0	66	0	0		112			2			REMIND		REMIND
'Lifetime|Liquids|Coal|w/ CCS'	0	0	0	0	0	0	0	0	46	0	66	0	0		112			2			REMIND		REMIND
'Lifetime|Liquids|Coal|w/o CCS'	0	0	0	0	0	0	0	0	46	0	66	0	0		112			2			REMIND		REMIND
'Lifetime|Liquids|Gas|w/ CCS'	0	0	0	0	0	0	0	0	46	0	0	0	0		46			1			MESSAGE		0
'Lifetime|Liquids|Gas|w/o CCS'	0	0	0	0	0	0	0	0	46	0	0	0	0		46			1			MESSAGE		0
'Lifetime|Liquids|Oil'	0	0	0	0	0	0	0	0	0	0	66	0	0		66			1			REMIND		0
'Material recycling|Chemicals'	0	0	0	0	0	0	8	0	0	0	0	0	0		8			1			IMAGE		0
'Material recycling|Plastics'	0	0	0	0	0	0	8	0	0	0	0	0	0		8			1			IMAGE		0
'OM Cost|Fixed|Electricity|Biomass|w/ CCS'	2	0	0	0	0	0	3	0	0	18	66	0	29		118			5			REMIND		REMIND
'OM Cost|Fixed|Electricity|Biomass|w/o CCS'	14	0	0	0	0	0	0	0	0	18	66	0	29		127			4			REMIND		REMIND
'OM Cost|Fixed|Electricity|Coal|w/ CCS'	2	0	0	0	0	0	3	0	0	18	66	0	29		118			5			REMIND		REMIND
'OM Cost|Fixed|Electricity|Coal|w/o CCS'	14	0	0	0	0	0	3	0	0	18	66	0	29		130			5			REMIND		REMIND
'OM Cost|Fixed|Electricity|Gas|w/ CCS'	2	0	0	0	0	0	3	0	0	18	66	0	29		118			5			REMIND		REMIND
'OM Cost|Fixed|Electricity|Gas|w/o CCS'	14	0	0	0	0	0	3	0	0	18	66	0	29		130			5			REMIND		REMIND
'OM Cost|Fixed|Electricity|Geothermal'	14	0	0	0	0	0	0	0	45	18	66	0	0		143			4			REMIND		REMIND
'OM Cost|Fixed|Electricity|Hydro'	14	0	0	0	0	0	3	0	45	18	66	0	29		175			6			REMIND		REMIND
'OM Cost|Fixed|Electricity|Nuclear'	14	0	0	0	0	0	3	0	45	18	66	0	29		175			6			REMIND		REMIND
'OM Cost|Fixed|Electricity|Solar|CSP'	0	0	0	0	0	0	3	0	0	18	66	0	29		116			4			REMIND		REMIND
'OM Cost|Fixed|Electricity|Solar|PV'	14	0	0	0	0	0	3	0	45	18	66	0	29		175			6			REMIND		REMIND
'OM Cost|Fixed|Electricity|Wind'	14	0	0	0	0	0	0	0	0	0	66	0	29		109			3			REMIND		REMIND
'OM Cost|Fixed|Electricity|Wind|Offshore'	0	0	0	0	0	0	3	0	45	18	0	0	29		95			4			MESSAGE		MESSAGE
'OM Cost|Fixed|Electricity|Wind|Onshore'	14	0	0	0	0	0	3	0	45	18	0	0	29		109			5			MESSAGE		MESSAGE
'OM Cost|Fixed|Gases|Biomass|w/o CCS'	0	0	0	0	0	0	0	0	45	0	66	0	0		111			2			REMIND		REMIND
'OM Cost|Fixed|Gases|Coal|w/o CCS'	0	0	0	0	0	0	0	0	45	0	66	0	0		111			2			REMIND		REMIND
'OM Cost|Fixed|Hydrogen|Biomass|w/ CCS'	0	0	0	0	0	0	0	0	45	16	66	0	0		127			3			REMIND		REMIND
'OM Cost|Fixed|Hydrogen|Biomass|w/o CCS'	0	0	0	0	0	0	0	0	45	16	66	0	0		127			3			REMIND		REMIND
'OM Cost|Fixed|Hydrogen|Coal|w/ CCS'	0	0	0	0	0	0	0	0	45	16	66	0	0		127			3			REMIND		REMIND
'OM Cost|Fixed|Hydrogen|Coal|w/o CCS'	0	0	0	0	0	0	0	0	45	16	66	0	0		127			3			REMIND		REMIND
'OM Cost|Fixed|Hydrogen|Electricity'	0	0	0	0	0	0	0	0	45	16	66	0	0		127			3			REMIND		REMIND
'OM Cost|Fixed|Hydrogen|Gas|w/ CCS'	0	0	0	0	0	0	0	0	45	16	66	0	0		127			3			REMIND		REMIND
'OM Cost|Fixed|Hydrogen|Gas|w/o CCS'	0	0	0	0	0	0	0	0	45	16	66	0	0		127			3			REMIND		REMIND
'OM Cost|Fixed|Liquids|Biomass|w/ CCS'	14	0	0	0	0	0	0	0	45	16	66	0	0		141			4			REMIND		REMIND
'OM Cost|Fixed|Liquids|Biomass|w/o CCS'	14	0	0	0	0	0	0	0	45	16	66	0	0		141			4			REMIND		REMIND
'OM Cost|Fixed|Liquids|Coal|w/ CCS'	0	0	0	0	0	0	0	0	45	0	66	0	0		111			2			REMIND		REMIND
'OM Cost|Fixed|Liquids|Coal|w/o CCS'	0	0	0	0	0	0	0	0	45	0	66	0	0		111			2			REMIND		REMIND
'OM Cost|Fixed|Liquids|Gas|w/ CCS'	0	0	0	0	0	0	0	0	45	0	0	0	0		45			1			MESSAGE		0
'OM Cost|Fixed|Liquids|Gas|w/o CCS'	0	0	0	0	0	0	0	0	45	0	0	0	0		45			1			MESSAGE		0
'OM Cost|Fixed|Liquids|Oil'	14	0	0	0	0	0	0	0	0	0	66	0	0		80			2			REMIND		REMIND
'Policy Cost|Additional Total Energy System Cost'	0	0	12	0	0	0	0	0	0	0	61	20	31		124			4			REMIND		REMIND
'Policy Cost|Area under MAC Curve'	0	0	0	0	0	0	31	0	0	26	0	0	0		57			2			IMAGE		IMAGE
'Policy Cost|Consumption Loss'	15	0	0	1	0	12	0	0	36	0	74	0	31		169			6			REMIND		REMIND
'Policy Cost|Default for CAV'	0	0	0	0	0	0	17	0	0	0	0	0	29		46			2			WITCH		WITCH
'Policy Cost|Equivalent Variation'	0	0	0	1	0	0	0	0	0	0	0	0	0		1			1			EPPA		0
'Policy Cost|GDP Loss'	15	0	12	1	1	12	0	0	36	0	74	0	31		182			8			REMIND		REMIND
'Policy Cost|Other'	0	0	0	0	0	0	0	0	0	0	1	0	0		1			1			REMIND		0
'Policy Cost|Welfare Change'	0	0	0	1	0	0	0	0	0	0	0	0	29		30			2			WITCH		WITCH
'Population'	17	0	0	1	13	12	34	0	59	26	84	0	31		277			9			REMIND		REMIND
'Population|Electricity Access'	0	0	0	0	0	0	8	0	0	0	0	0	0		8			1			IMAGE		0
'Population|Extreme poverty'	0	0	0	0	0	0	0	0	0	0	0	0	0		0			0			0		0
'Population|Female'	0	0	0	0	0	0	0	0	0	0	0	0	0		0			0			0		0
'Population|Male'	0	0	0	0	0	0	0	0	0	0	0	0	0		0			0			0		0
'Population|Relying on Solid Fuels'	1	0	0	0	0	0	9	0	0	0	0	0	0		10			2			IMAGE		IMAGE
'Population|Risk of Hunger'	15	0	0	0	0	0	1	0	0	0	33	0	0		49			3			REMIND		REMIND
'Population|Rural'	0	0	0	0	0	0	18	0	48	18	0	0	0		84			3			MESSAGE		MESSAGE
'Population|Urban'	0	0	0	0	0	0	23	0	48	24	0	0	0		95			3			MESSAGE		MESSAGE
'Population|Urban|Share'	0	0	0	0	0	0	0	0	0	0	0	0	0		0			0			0		0
'Population|Working Age'	0	0	0	0	0	0	0	0	0	0	0	0	0		0			0			0		0
'Premature Deaths|PM2.5'	1	0	0	0	0	0	0	0	0	0	0	0	0		1			1			AIM		0
'Price|Agriculture|Corn|Index'	13	0	0	0	1	0	0	0	0	0	0	0	0		14			2			AIM		AIM
'Price|Agriculture|Livestock|Index'	0	0	0	0	0	0	8	0	0	0	0	0	0		8			1			IMAGE		0
'Price|Agriculture|Non-Energy Crops and Livestock|Index'	14	0	0	0	0	0	15	0	2	16	33	0	26		106			6			REMIND		REMIND
'Price|Agriculture|Non-Energy Crops|Index'	13	0	0	0	1	0	14	0	2	0	0	0	26		56			5			WITCH		WITCH
'Price|Agriculture|Rice|Index'	0	0	0	0	0	0	8	0	0	0	0	0	0		8			1			IMAGE		0
'Price|Agriculture|Soybean|Index'	13	0	0	0	1	0	8	0	0	0	0	0	0		22			3			AIM		AIM
'Price|Agriculture|Wheat|Index'	13	0	0	0	1	0	8	0	0	0	0	0	0		22			3			AIM		AIM
'Price|Carbon'	16	0	14	1	1	12	34	0	59	26	84	20	31		298			11			REMIND		REMIND
'Price|Final Energy|Residential and Commercial|Residential|Electricity'	1	0	0	0	1	0	3	0	45	0	70	20	28		168			7			REMIND		REMIND
'Price|Final Energy|Residential and Commercial|Residential|Gases|Natural Gas'	0	0	0	0	1	0	0	0	45	0	70	20	0		136			4			REMIND		REMIND
'Price|Final Energy|Residential and Commercial|Residential|Liquids|Biomass'	0	0	0	0	0	0	0	0	45	0	0	20	0		65			2			MESSAGE		MESSAGE
'Price|Final Energy|Residential and Commercial|Residential|Liquids|Oil'	0	0	0	0	0	0	0	0	45	0	70	20	0		135			3			REMIND		REMIND
'Price|Final Energy|Residential and Commercial|Residential|Solids|Biomass'	0	0	0	0	0	0	3	0	45	0	70	20	0		138			4			REMIND		REMIND
'Price|Final Energy|Residential and Commercial|Residential|Solids|Coal'	1	0	0	0	0	0	3	0	45	0	70	20	0		139			5			REMIND		REMIND
'Price|Final Energy|Transportation|Electricity'	0	0	0	0	0	0	0	0	0	0	38	0	0		38			1			REMIND		0
'Price|Final Energy|Transportation|Gases'	0	0	0	0	0	0	0	0	0	0	9	0	0		9			1			REMIND		0
'Price|Final Energy|Transportation|Hydrogen'	0	0	0	0	1	0	0	0	0	0	42	0	0		43			2			REMIND		REMIND
'Price|Final Energy|Transportation|Liquids'	0	0	0	0	1	0	0	0	0	0	42	0	0		43			2			REMIND		REMIND
'Price|Final Energy|Transportation|Liquids|Bioenergy'	0	0	0	0	0	0	0	0	0	0	0	0	0		0			0			0		0
'Price|Primary Energy|Biomass'	14	0	0	0	1	0	0	0	48	2	74	20	29		188			7			REMIND		REMIND
'Price|Primary Energy|Coal'	14	0	0	0	1	0	24	0	48	20	74	20	29		230			8			REMIND		REMIND
'Price|Primary Energy|Gas'	14	0	0	0	1	0	24	0	48	20	74	20	29		230			8			REMIND		REMIND
'Price|Primary Energy|Oil'	14	0	0	0	1	0	24	0	48	20	74	20	29		230			8			REMIND		REMIND
'Price|Secondary Energy|Electricity'	14	0	0	0	1	0	24	0	48	18	74	20	29		228			8			REMIND		REMIND
'Price|Secondary Energy|Gases|Natural Gas'	0	0	0	0	1	0	22	0	0	18	70	0	29		140			5			REMIND		REMIND
'Price|Secondary Energy|Hydrogen'	0	0	0	0	1	0	0	0	48	0	73	0	0		122			3			REMIND		REMIND
'Price|Secondary Energy|Liquids'	14	0	0	0	1	0	0	0	48	18	71	0	0		152			5			REMIND		REMIND
'Price|Secondary Energy|Liquids|Biomass'	14	0	0	0	1	0	3	0	48	18	70	0	29		183			7			REMIND		REMIND
'Price|Secondary Energy|Liquids|Oil'	0	0	0	0	1	0	22	0	48	18	70	0	29		188			6			REMIND		REMIND
'Price|Secondary Energy|Solids|Biomass'	0	0	0	0	0	0	22	0	0	16	0	0	0		38			2			IMAGE		IMAGE
'Price|Secondary Energy|Solids|Coal'	0	0	0	0	1	0	22	0	0	18	28	0	29		98			5			WITCH		WITCH
'Primary Energy'	17	0	14	1	13	12	34	0	59	26	84	20	31		311			11			REMIND		REMIND
'Primary Energy|Biomass'	17	0	14	1	13	12	34	0	59	26	84	20	31		311			11			REMIND		REMIND
'Primary Energy|Biomass|1st Generation'	14	0	0	0	13	0	8	0	48	18	62	0	0		163			6			REMIND		REMIND
'Primary Energy|Biomass|Electricity'	14	0	0	0	0	12	23	0	51	24	61	20	0		205			7			REMIND		REMIND
'Primary Energy|Biomass|Electricity|w/ CCS'	14	0	0	0	0	12	23	0	51	24	49	20	0		193			7			MESSAGE		MESSAGE
'Primary Energy|Biomass|Electricity|w/o CCS'	14	0	0	0	0	12	23	0	51	24	49	20	0		193			7			MESSAGE		MESSAGE
'Primary Energy|Biomass|Energy Crops'	14	0	0	0	0	0	18	0	48	18	62	0	0		160			5			REMIND		REMIND
'Primary Energy|Biomass|Gases'	0	0	0	0	0	0	0	0	46	0	58	0	0		104			2			REMIND		REMIND
'Primary Energy|Biomass|Hydrogen'	0	0	0	0	0	0	18	0	46	0	58	0	0		122			3			REMIND		REMIND
'Primary Energy|Biomass|Liquids'	14	0	0	0	0	0	8	0	46	0	49	0	0		117			4			REMIND		REMIND
'Primary Energy|Biomass|Modern'	14	0	0	0	13	12	29	0	53	26	73	20	25		265			9			REMIND		REMIND
'Primary Energy|Biomass|Modern|w/ CCS'	4	0	13	0	12	0	31	0	47	24	71	20	30		252			9			REMIND		REMIND
'Primary Energy|Biomass|Modern|w/o CCS'	4	0	13	0	12	0	31	0	47	24	71	20	30		252			9			REMIND		REMIND
'Primary Energy|Biomass|Residues'	14	0	0	0	0	0	18	0	48	18	62	0	0		160			5			REMIND		REMIND
'Primary Energy|Biomass|Solids'	13	0	0	0	0	0	8	0	46	0	58	0	0		125			4			REMIND		REMIND
'Primary Energy|Biomass|Traditional'	14	0	0	0	13	12	27	0	51	20	66	20	29		252			9			REMIND		REMIND
'Primary Energy|Coal'	17	0	14	1	13	12	34	0	59	26	84	20	31		311			11			REMIND		REMIND
'Primary Energy|Coal|Electricity'	14	0	0	0	0	12	22	0	48	18	56	20	0		190			7			REMIND		REMIND
'Primary Energy|Coal|Electricity|w/ CCS'	14	0	0	0	0	12	18	0	48	18	41	20	0		171			7			MESSAGE		MESSAGE
'Primary Energy|Coal|Electricity|w/o CCS'	14	0	0	0	0	12	18	0	48	18	41	20	0		171			7			MESSAGE		MESSAGE
'Primary Energy|Coal|Gases'	0	0	0	0	0	0	0	0	46	0	58	0	0		104			2			REMIND		REMIND
'Primary Energy|Coal|Hydrogen'	0	0	0	0	0	0	18	0	46	0	49	0	0		113			3			REMIND		REMIND
'Primary Energy|Coal|Liquids'	0	0	0	0	0	0	0	0	46	0	58	0	0		104			2			REMIND		REMIND
'Primary Energy|Coal|Solids'	0	0	0	0	0	0	0	0	46	0	58	0	0		104			2			REMIND		REMIND
'Primary Energy|Coal|w/ CCS'	17	0	14	0	13	12	34	0	54	26	76	20	31		297			10			REMIND		REMIND
'Primary Energy|Coal|w/o CCS'	17	0	14	0	13	12	34	0	54	26	76	20	31		297			10			REMIND		REMIND
'Primary Energy|Fossil'	17	0	14	1	13	12	34	0	59	26	84	20	31		311			11			REMIND		REMIND
'Primary Energy|Fossil|w/ CCS'	16	0	14	1	1	12	32	0	54	20	83	17	29		279			11			REMIND		REMIND
'Primary Energy|Fossil|w/o CCS'	16	0	14	1	1	12	32	0	54	26	83	17	29		285			11			REMIND		REMIND
'Primary Energy|Gas'	17	0	14	1	13	12	34	0	59	26	84	20	31		311			11			REMIND		REMIND
'Primary Energy|Gas|Electricity'	14	0	0	0	0	12	18	0	48	18	70	20	0		200			7			REMIND		REMIND
'Primary Energy|Gas|Electricity|w/ CCS'	14	0	0	0	0	12	18	0	48	18	50	20	0		180			7			REMIND		REMIND
'Primary Energy|Gas|Electricity|w/o CCS'	14	0	0	0	0	12	18	0	48	18	50	20	0		180			7			REMIND		REMIND
'Primary Energy|Gas|Gases'	0	0	0	0	0	0	0	0	46	0	66	0	0		112			2			REMIND		REMIND
'Primary Energy|Gas|Hydrogen'	0	0	0	0	0	0	18	0	46	0	66	0	27		157			4			REMIND		REMIND
'Primary Energy|Gas|Liquids'	0	0	0	0	0	0	0	0	46	0	66	0	0		112			2			REMIND		REMIND
'Primary Energy|Gas|Solids'	0	0	0	0	0	0	0	0	46	0	0	0	0		46			1			MESSAGE		0
'Primary Energy|Gas|w/ CCS'	17	0	14	0	13	12	34	0	54	26	84	20	31		305			10			REMIND		REMIND
'Primary Energy|Gas|w/o CCS'	17	0	14	0	13	12	34	0	54	26	84	20	31		305			10			REMIND		REMIND
'Primary Energy|Geothermal'	17	0	14	0	0	12	12	0	55	24	79	20	2		235			9			REMIND		REMIND
'Primary Energy|Hydro'	17	0	14	1	0	12	32	0	55	24	79	20	31		285			10			REMIND		REMIND
'Primary Energy|Non-Biomass Renewables'	17	0	14	1	13	12	34	0	59	26	84	20	31		311			11			REMIND		REMIND
'Primary Energy|Non-Biomass Renewables|Geothermal'	0	0	0	0	13	0	0	0	2	0	4	0	0		19			3			GCAM		GCAM
'Primary Energy|Non-Biomass Renewables|Hydro'	0	0	0	0	13	0	9	0	2	0	4	0	0		28			4			GCAM		GCAM
'Primary Energy|Non-Biomass Renewables|Ocean'	0	0	0	0	0	0	0	0	2	0	0	0	0		2			1			MESSAGE		0
'Primary Energy|Non-Biomass Renewables|Solar'	0	0	0	0	13	0	9	0	2	0	4	0	0		28			4			GCAM		GCAM
'Primary Energy|Non-Biomass Renewables|Wind'	0	0	0	0	13	0	9	0	2	0	4	0	0		28			4			GCAM		GCAM
'Primary Energy|Nuclear'	17	0	14	1	13	12	34	0	59	26	84	20	31		311			11			REMIND		REMIND
'Primary Energy|Ocean'	0	0	0	0	0	12	0	0	51	24	0	0	0		87			3			MESSAGE		MESSAGE
'Primary Energy|Oil'	17	0	14	1	13	12	34	0	59	26	84	20	31		311			11			REMIND		REMIND
'Primary Energy|Oil|Electricity'	14	0	0	0	0	12	18	0	48	18	28	20	29		187			8			MESSAGE		MESSAGE
'Primary Energy|Oil|Electricity|w/ CCS'	14	0	0	0	0	12	18	0	48	18	28	20	0		158			7			MESSAGE		MESSAGE
'Primary Energy|Oil|Electricity|w/o CCS'	14	0	0	0	0	12	18	0	48	18	28	20	0		158			7			MESSAGE		MESSAGE
'Primary Energy|Oil|Gases'	0	0	0	0	0	0	0	0	46	0	0	0	0		46			1			MESSAGE		0
'Primary Energy|Oil|Hydrogen'	0	0	0	0	0	0	18	0	46	0	0	0	0		64			2			MESSAGE		MESSAGE
'Primary Energy|Oil|Liquids'	0	0	0	0	0	0	0	0	46	0	0	0	0		46			1			MESSAGE		0
'Primary Energy|Oil|Solids'	0	0	0	0	0	0	0	0	46	0	0	0	0		46			1			MESSAGE		0
'Primary Energy|Oil|w/ CCS'	17	0	14	0	13	12	34	0	0	24	0	17	0		131			7			IMAGE		IMAGE
'Primary Energy|Oil|w/o CCS'	17	0	14	0	13	12	34	0	54	26	76	17	31		294			10			REMIND		REMIND
'Primary Energy|Other'	17	0	0	0	0	12	29	0	56	18	0	20	0		152			6			MESSAGE		MESSAGE
'Primary Energy|Renewables (incl. Biomass)'	17	0	14	1	13	12	34	0	59	26	84	20	31		311			11			REMIND		REMIND
'Primary Energy|Secondary Energy Trade'	15	0	0	0	0	0	0	0	51	26	0	0	0		92			3			MESSAGE		MESSAGE
'Primary Energy|Solar'	17	0	14	0	0	12	32	0	55	24	79	20	31		284			9			REMIND		REMIND
'Primary Energy|Wind'	17	0	14	0	0	12	32	0	55	24	79	20	31		284			9			REMIND		REMIND
'Production|Cement'	0	0	14	0	1	0	9	0	0	0	7	0	0		31			4			COFFEE		COFFEE
'Production|Chemicals'	0	0	0	0	0	0	8	0	0	0	0	0	0		8			1			IMAGE		0
'Production|Non-ferrous metals'	0	0	0	0	1	0	0	0	0	0	0	0	0		1			1			GCAM		0
'Production|Pulp and Paper'	0	0	0	0	0	0	8	0	0	0	0	0	0		8			1			IMAGE		0
'Production|Steel'	0	0	14	0	1	0	18	0	0	0	7	0	0		40			4			IMAGE		IMAGE
'Resource|Extraction|Coal'	0	0	0	0	0	0	0	0	3	0	38	0	0		41			2			REMIND		REMIND
'Resource|Extraction|Fossil'	0	0	0	0	0	0	0	0	0	0	0	0	0		0			0			0		0
'Resource|Extraction|Gas'	0	0	0	0	0	0	0	0	3	0	38	0	0		41			2			REMIND		REMIND
'Resource|Extraction|Oil'	0	0	0	0	0	0	0	0	3	0	38	0	0		41			2			REMIND		REMIND
'Resource|Use|Mineral|Electricity'	1	0	0	0	0	0	1	0	0	0	0	0	0		2			2			AIM		AIM
'Revenue|government'	0	0	0	0	0	0	0	0	0	0	0	0	0		0			0			0		0
'Secondary Energy'	14	0	14	0	1	12	18	0	53	18	70	0	29		229			9			REMIND		REMIND
'Secondary Energy|Electricity'	17	0	14	1	13	12	34	0	59	26	84	20	31		311			11			REMIND		REMIND
'Secondary Energy|Electricity|Biomass'	17	0	14	1	13	12	33	0	59	26	84	20	31		310			11			REMIND		REMIND
'Secondary Energy|Electricity|Biomass|w/ CCS'	17	0	14	0	13	12	34	0	54	26	84	20	31		305			10			REMIND		REMIND
'Secondary Energy|Electricity|Biomass|w/o CCS'	17	0	14	0	13	12	34	0	54	26	84	20	31		305			10			REMIND		REMIND
'Secondary Energy|Electricity|Coal'	17	0	14	1	13	12	34	0	59	26	84	20	31		311			11			REMIND		REMIND
'Secondary Energy|Electricity|Coal|w/ CCS'	17	0	14	1	13	12	34	0	54	26	84	20	31		306			11			REMIND		REMIND
'Secondary Energy|Electricity|Coal|w/o CCS'	17	0	14	1	13	12	34	0	54	26	84	20	31		306			11			REMIND		REMIND
'Secondary Energy|Electricity|Curtailment'	12	0	0	0	0	0	8	0	0	0	66	0	0		86			3			REMIND		REMIND
'Secondary Energy|Electricity|Fossil'	17	0	14	1	13	12	34	0	59	26	84	20	31		311			11			REMIND		REMIND
'Secondary Energy|Electricity|Fossil|w/ CCS'	14	0	14	1	0	0	18	0	48	18	0	20	29		162			8			MESSAGE		MESSAGE
'Secondary Energy|Electricity|Fossil|w/o CCS'	14	0	14	1	1	12	18	0	48	18	0	20	29		175			10			MESSAGE		MESSAGE
'Secondary Energy|Electricity|Gas'	17	0	14	1	13	12	34	0	59	26	84	20	31		311			11			REMIND		REMIND
'Secondary Energy|Electricity|Gas|w/ CCS'	17	0	14	1	13	12	34	0	54	26	84	20	31		306			11			REMIND		REMIND
'Secondary Energy|Electricity|Gas|w/o CCS'	17	0	14	1	13	12	34	0	54	26	84	20	31		306			11			REMIND		REMIND
'Secondary Energy|Electricity|Geothermal'	17	0	14	0	13	12	0	0	54	26	84	20	0		240			8			REMIND		REMIND
'Secondary Energy|Electricity|Hydro'	17	0	14	1	13	12	34	0	59	26	84	20	31		311			11			REMIND		REMIND
'Secondary Energy|Electricity|Non-Biomass Renewables'	17	0	14	1	13	12	34	0	59	26	84	20	31		311			11			REMIND		REMIND
'Secondary Energy|Electricity|Nuclear'	17	0	14	1	13	12	34	0	59	26	84	20	31		311			11			REMIND		REMIND
'Secondary Energy|Electricity|Ocean'	0	0	0	0	0	0	0	0	0	26	0	0	0		26			1			POLES		0
'Secondary Energy|Electricity|Oil'	17	0	14	1	13	12	34	0	59	26	84	20	31		311			11			REMIND		REMIND
'Secondary Energy|Electricity|Oil|w/ CCS'	15	0	14	0	12	12	31	0	0	24	0	20	0		128			7			IMAGE		IMAGE
'Secondary Energy|Electricity|Oil|w/o CCS'	15	0	14	0	13	12	31	0	47	26	83	20	31		292			10			REMIND		REMIND
'Secondary Energy|Electricity|Other'	14	0	0	0	0	12	18	0	53	18	37	0	0		152			6			MESSAGE		MESSAGE
'Secondary Energy|Electricity|Renewables (incl. Biomass)'	17	0	14	1	13	12	34	0	59	26	84	20	31		311			11			REMIND		REMIND
'Secondary Energy|Electricity|Solar'	17	0	14	0	13	12	34	0	59	26	84	20	31		310			10			REMIND		REMIND
'Secondary Energy|Electricity|Solar|CSP'	0	0	14	0	13	0	24	0	50	20	74	20	29		244			8			REMIND		REMIND
'Secondary Energy|Electricity|Solar|PV'	14	0	14	0	13	0	24	0	50	20	74	20	29		258			9			REMIND		REMIND
'Secondary Energy|Electricity|Storage Losses'	0	0	0	0	0	0	18	0	48	0	0	0	0		66			2			MESSAGE		MESSAGE
'Secondary Energy|Electricity|Transmission Losses'	14	0	0	0	0	0	0	0	48	0	0	0	0		62			2			MESSAGE		MESSAGE
'Secondary Energy|Electricity|Wind'	17	0	14	0	13	12	34	0	59	26	84	20	31		310			10			REMIND		REMIND
'Secondary Energy|Electricity|Wind|Offshore'	0	0	14	0	13	0	24	0	50	20	0	20	29		170			7			MESSAGE		MESSAGE
'Secondary Energy|Electricity|Wind|Onshore'	14	0	14	0	13	0	24	0	50	20	0	20	29		184			8			MESSAGE		MESSAGE
'Secondary Energy|Gases'	17	0	14	0	1	0	34	0	59	26	84	20	31		286			9			REMIND		REMIND
'Secondary Energy|Gases|Biomass'	0	0	0	0	1	0	0	0	51	20	75	0	0		147			4			REMIND		REMIND
'Secondary Energy|Gases|Coal'	0	0	0	0	1	0	0	0	51	20	75	0	0		147			4			REMIND		REMIND
'Secondary Energy|Gases|Natural Gas'	16	0	14	0	1	0	27	0	51	20	75	0	29		233			8			REMIND		REMIND
'Secondary Energy|Gases|Other'	0	0	0	0	0	0	0	0	48	0	35	0	0		83			2			MESSAGE		MESSAGE
'Secondary Energy|Heat'	16	0	0	0	0	0	3	0	59	26	83	20	0		207			6			REMIND		REMIND
'Secondary Energy|Heat|Biomass'	14	0	0	0	0	0	3	0	48	0	70	0	0		135			4			REMIND		REMIND
'Secondary Energy|Heat|Coal'	14	0	0	0	0	0	3	0	48	0	70	0	0		135			4			REMIND		REMIND
'Secondary Energy|Heat|Fossil'	14	0	0	0	0	0	3	0	48	0	70	0	0		135			4			REMIND		REMIND
'Secondary Energy|Heat|Gas'	14	0	0	0	0	0	3	0	48	0	70	0	0		135			4			REMIND		REMIND
'Secondary Energy|Heat|Geothermal'	16	0	0	0	0	0	0	0	49	0	74	0	0		139			3			REMIND		REMIND
'Secondary Energy|Heat|Non-Biomass Renewables'	16	0	0	0	0	0	0	0	49	18	74	0	0		157			4			REMIND		REMIND
'Secondary Energy|Heat|Nuclear'	14	0	0	0	0	0	0	0	0	0	0	0	0		14			1			AIM		0
'Secondary Energy|Heat|Oil'	14	0	0	0	0	0	3	0	48	0	0	0	0		65			3			MESSAGE		MESSAGE
'Secondary Energy|Heat|Other'	0	0	0	0	0	0	0	0	48	0	0	0	0		48			1			MESSAGE		0
'Secondary Energy|Heat|Renewables (incl. Biomass)'	16	0	0	0	0	0	3	0	49	18	74	0	0		160			5			REMIND		REMIND
'Secondary Energy|Heat|Solar'	0	0	0	0	0	0	0	0	0	18	0	0	0		18			1			POLES		0
'Secondary Energy|Hydrogen'	0	0	14	0	1	0	29	0	56	20	76	20	27		243			8			REMIND		REMIND
'Secondary Energy|Hydrogen|Biomass'	0	0	0	0	1	0	25	0	49	18	74	0	0		167			5			REMIND		REMIND
'Secondary Energy|Hydrogen|Biomass|w/ CCS'	0	0	0	0	1	0	25	0	49	18	74	0	0		167			5			REMIND		REMIND
'Secondary Energy|Hydrogen|Biomass|w/o CCS'	0	0	0	0	1	0	25	0	49	18	74	0	0		167			5			REMIND		REMIND
'Secondary Energy|Hydrogen|Coal'	0	0	0	0	1	0	18	0	48	18	70	0	0		155			5			REMIND		REMIND
'Secondary Energy|Hydrogen|Coal|w/ CCS'	0	0	0	0	0	0	18	0	48	18	70	0	0		154			4			REMIND		REMIND
'Secondary Energy|Hydrogen|Coal|w/o CCS'	0	0	0	0	1	0	18	0	48	18	70	0	0		155			5			REMIND		REMIND
'Secondary Energy|Hydrogen|Electricity'	0	0	0	0	1	0	25	0	49	18	74	0	25		192			6			REMIND		REMIND
'Secondary Energy|Hydrogen|Fossil'	0	0	0	0	1	0	22	0	48	18	73	0	27		189			6			REMIND		REMIND
'Secondary Energy|Hydrogen|Fossil|w/ CCS'	0	0	0	0	1	0	22	0	48	0	73	0	0		144			4			REMIND		REMIND
'Secondary Energy|Hydrogen|Fossil|w/o CCS'	0	0	0	0	1	0	22	0	48	0	73	0	0		144			4			REMIND		REMIND
'Secondary Energy|Hydrogen|Gas'	0	0	0	0	1	0	18	0	48	18	70	0	27		182			6			REMIND		REMIND
'Secondary Energy|Hydrogen|Gas|w/ CCS'	0	0	0	0	1	0	18	0	48	18	70	0	27		182			6			REMIND		REMIND
'Secondary Energy|Hydrogen|Gas|w/o CCS'	0	0	0	0	1	0	18	0	48	18	70	0	27		182			6			REMIND		REMIND
'Secondary Energy|Hydrogen|Non-Biomass Renewables'	0	0	0	0	0	0	18	0	0	18	0	0	0		36			2			IMAGE		IMAGE
'Secondary Energy|Hydrogen|Nuclear'	0	0	0	0	0	0	0	0	0	18	0	0	0		18			1			POLES		0
'Secondary Energy|Hydrogen|Oil'	0	0	0	0	0	0	18	0	0	0	0	0	0		18			1			IMAGE		0
'Secondary Energy|Hydrogen|Other'	0	0	0	0	0	0	9	0	0	18	0	0	0		27			2			POLES		POLES
'Secondary Energy|Hydrogen|Renewables (incl. Biomass)'	0	0	0	0	1	0	25	0	49	18	74	0	0		167			5			REMIND		REMIND
'Secondary Energy|Hydrogen|Solar'	0	0	0	0	0	0	18	0	0	18	0	0	0		36			2			IMAGE		IMAGE
'Secondary Energy|Liquids'	17	0	14	0	1	0	34	0	59	26	84	20	31		286			9			REMIND		REMIND
'Secondary Energy|Liquids|Biomass'	16	0	14	0	1	0	32	0	54	26	83	0	29		255			8			REMIND		REMIND
'Secondary Energy|Liquids|Biomass|1st Generation'	14	0	0	0	0	0	8	0	0	18	66	0	29		135			5			REMIND		REMIND
'Secondary Energy|Liquids|Biomass|Energy Crops'	14	0	0	0	0	0	18	0	0	18	66	0	29		145			5			REMIND		REMIND
'Secondary Energy|Liquids|Biomass|Other'	0	0	0	0	0	0	8	0	0	0	0	0	0		8			1			IMAGE		0
'Secondary Energy|Liquids|Biomass|Residues'	14	0	0	0	0	0	10	0	0	18	66	0	0		108			4			REMIND		REMIND
'Secondary Energy|Liquids|Biomass|w/ CCS'	14	0	14	0	1	0	13	0	54	26	83	0	0		205			7			REMIND		REMIND
'Secondary Energy|Liquids|Biomass|w/o CCS'	14	0	14	0	1	0	32	0	54	26	83	0	0		224			7			REMIND		REMIND
'Secondary Energy|Liquids|Coal'	0	0	14	0	1	0	0	0	54	26	83	0	0		178			5			REMIND		REMIND
'Secondary Energy|Liquids|Coal|w/ CCS'	0	0	14	0	0	0	0	0	54	26	80	0	0		174			4			REMIND		REMIND
'Secondary Energy|Liquids|Coal|w/o CCS'	0	0	14	0	1	0	0	0	54	26	80	0	0		175			5			REMIND		REMIND
'Secondary Energy|Liquids|Fossil'	14	0	14	0	1	0	18	0	48	18	70	0	29		212			8			REMIND		REMIND
'Secondary Energy|Liquids|Fossil|w/ CCS'	0	0	14	0	0	0	0	0	48	18	70	0	0		150			4			REMIND		REMIND
'Secondary Energy|Liquids|Fossil|w/o CCS'	14	0	14	0	1	0	18	0	48	18	70	0	0		183			7			REMIND		REMIND
'Secondary Energy|Liquids|Gas'	0	0	0	0	1	0	0	0	54	26	81	0	0		162			4			REMIND		REMIND
'Secondary Energy|Liquids|Gas|w/ CCS'	0	0	0	0	0	0	0	0	54	26	78	0	0		158			3			REMIND		REMIND
'Secondary Energy|Liquids|Gas|w/o CCS'	0	0	0	0	0	0	0	0	54	26	78	0	0		158			3			REMIND		REMIND
'Secondary Energy|Liquids|Oil'	16	0	14	0	1	0	32	0	54	26	83	0	29		255			8			REMIND		REMIND
'Secondary Energy|Liquids|Other'	0	0	0	0	0	0	0	0	0	18	0	0	0		18			1			POLES		0
'Secondary Energy|Other Carrier'	0	0	0	0	0	0	0	0	0	0	0	0	0		0			0			0		0
'Secondary Energy|Solids'	14	0	14	0	0	0	32	0	59	26	83	0	29		257			7			REMIND		REMIND
'Secondary Energy|Solids|Biomass'	14	0	14	0	0	0	18	0	48	18	70	0	0		182			6			REMIND		REMIND
'Secondary Energy|Solids|Coal'	14	0	14	0	0	0	18	0	48	18	70	0	29		211			7			REMIND		REMIND
'Specific Energy Consumption|Production|Cement'	0	0	0	0	0	0	0	0	0	0	0	0	0		0			0			0		0
'Specific Energy Consumption|Production|Chemicals'	0	0	0	0	0	0	0	0	0	0	0	0	0		0			0			0		0
'Specific Energy Consumption|Production|Chemicals|Ammonia'	0	0	0	0	0	0	0	0	0	0	0	0	0		0			0			0		0
'Specific Energy Consumption|Production|Chemicals|High value chemicals'	0	0	0	0	0	0	0	0	0	0	0	0	0		0			0			0		0
'Specific Energy Consumption|Production|Chemicals|Methanol'	0	0	0	0	0	0	0	0	0	0	0	0	0		0			0			0		0
'Specific Energy Consumption|Production|Steel'	0	0	0	0	0	0	0	0	0	0	0	0	0		0			0			0		0
'Subsidies|Energy'	0	0	0	0	0	0	18	0	0	0	66	0	0		84			2			REMIND		REMIND
'Subsidies|Energy|Fossil'	0	0	0	0	0	0	18	0	0	0	66	0	0		84			2			REMIND		REMIND
'Temperature|Global Mean'	0	0	0	1	12	0	15	0	2	0	22	0	0		52			5			REMIND		REMIND
'Trade'	0	0	14	0	0	0	0	0	43	0	66	0	0		123			3			REMIND		REMIND
'Trade|Primary Energy|Biomass|Volume'	14	0	14	0	0	0	22	0	45	18	73	20	0		206			7			REMIND		REMIND
'Trade|Primary Energy|Coal|Volume'	14	0	14	0	1	0	22	0	48	18	73	20	29		239			9			REMIND		REMIND
'Trade|Primary Energy|Gas|Volume'	14	0	14	0	1	0	22	0	48	18	73	20	29		239			9			REMIND		REMIND
'Trade|Primary Energy|Oil|Volume'	14	0	14	0	1	0	22	0	48	18	73	20	29		239			9			REMIND		REMIND
'Trade|Secondary Energy|Electricity|Volume'	14	0	0	0	0	0	0	0	46	18	0	0	0		78			3			MESSAGE		MESSAGE
'Trade|Secondary Energy|Hydrogen|Volume'	0	0	0	0	0	0	3	0	46	0	0	0	0		49			2			MESSAGE		MESSAGE
'Trade|Secondary Energy|Liquids|Biomass|Volume'	14	0	14	0	0	0	3	0	46	0	0	0	0		77			4			MESSAGE		MESSAGE
'Trade|Secondary Energy|Liquids|Coal|Volume'	0	0	0	0	0	0	0	0	46	0	0	0	0		46			1			MESSAGE		0
'Trade|Secondary Energy|Liquids|Oil|Volume'	14	0	14	0	0	0	0	0	46	0	0	0	0		74			3			MESSAGE		MESSAGE
'Trade|Uranium|Mass'	0	0	0	0	0	0	0	0	0	0	66	0	0		66			1			REMIND		0
'Transport|Stock|Road'	0	0	0	0	0	0	0	0	0	0	0	0	0		0			0			0		0
'Transport|Stock|Road|Freight'	0	0	0	0	0	0	0	0	0	0	0	0	0		0			0			0		0
'Transport|Stock|Road|Passenger'	0	0	0	0	0	0	0	0	0	0	0	0	0		0			0			0		0
'Transport|Stock|Road|Passenger|2W&3W'	0	0	0	0	0	0	0	0	0	0	0	0	0		0			0			0		0
'Transport|Stock|Road|Passenger|Bus'	0	0	0	0	0	0	0	0	0	0	0	0	0		0			0			0		0
'Transport|Stock|Road|Passenger|LDV'	0	0	0	0	0	0	0	0	0	0	0	0	0		0			0			0		0
'Unemployment'	0	0	0	0	0	12	0	0	0	0	0	0	0		12			1			GEM-E3		0
'Unemployment|Rate'	12	0	0	0	0	12	0	0	0	0	0	0	0		24			2			AIM		AIM
'Value Added|Agriculture'	14	0	0	0	0	12	0	0	0	0	0	0	0		26			2			AIM		AIM
'Value Added|Industry'	0	0	0	0	0	12	20	0	0	2	0	0	0		34			3			IMAGE		IMAGE
'Value Added|Industry|Energy'	12	0	0	0	0	0	0	0	0	0	0	0	0		12			1			AIM		0
'Value Added|Industry|Energy Intensive'	0	0	0	0	0	12	0	0	0	0	0	0	0		12			1			GEM-E3		0
'Value Added|Industry|Manufacturing'	0	0	0	0	0	0	0	0	0	0	0	0	0		0			0			0		0
'Value Added|Residential and Commercial|Commercial'	0	0	0	0	0	12	9	0	0	0	0	0	0		21			2			GEM-E3		GEM-E3
'Water Consumption'	14	0	0	0	0	0	0	0	48	0	0	0	29		91			3			MESSAGE		MESSAGE
'Water Consumption|Electricity'	15	0	0	0	0	0	21	0	46	0	0	0	29		111			4			MESSAGE		MESSAGE
'Water Consumption|Electricity w/o Hydro'	1	0	0	0	0	0	1	0	0	0	0	0	0		2			2			AIM		AIM
'Water Consumption|Electricity|Biomass'	14	0	0	0	0	0	18	0	46	0	0	0	29		107			4			MESSAGE		MESSAGE
'Water Consumption|Electricity|Biomass|w/ CCS'	14	0	0	0	0	0	18	0	46	0	0	0	29		107			4			MESSAGE		MESSAGE
'Water Consumption|Electricity|Biomass|w/o CCS'	14	0	0	0	0	0	18	0	46	0	0	0	29		107			4			MESSAGE		MESSAGE
'Water Consumption|Electricity|Coal'	14	0	0	0	0	0	18	0	46	0	0	0	29		107			4			MESSAGE		MESSAGE
'Water Consumption|Electricity|Coal|w/ CCS'	14	0	0	0	0	0	18	0	46	0	0	0	29		107			4			MESSAGE		MESSAGE
'Water Consumption|Electricity|Coal|w/o CCS'	14	0	0	0	0	0	18	0	46	0	0	0	29		107			4			MESSAGE		MESSAGE
'Water Consumption|Electricity|Cooling Pond'	0	0	0	0	0	0	18	0	0	0	0	0	29		47			2			WITCH		WITCH
'Water Consumption|Electricity|Dry Cooling'	0	0	0	0	0	0	18	0	46	0	0	0	29		93			3			MESSAGE		MESSAGE
'Water Consumption|Electricity|Fossil'	14	0	0	0	0	0	18	0	46	0	0	0	29		107			4			MESSAGE		MESSAGE
'Water Consumption|Electricity|Fossil|w/ CCS'	14	0	0	0	0	0	18	0	46	0	0	0	29		107			4			MESSAGE		MESSAGE
'Water Consumption|Electricity|Fossil|w/o CCS'	14	0	0	0	0	0	18	0	46	0	0	0	29		107			4			MESSAGE		MESSAGE
'Water Consumption|Electricity|Gas'	14	0	0	0	0	0	18	0	46	0	0	0	29		107			4			MESSAGE		MESSAGE
'Water Consumption|Electricity|Gas|w/ CCS'	14	0	0	0	0	0	18	0	46	0	0	0	29		107			4			MESSAGE		MESSAGE
'Water Consumption|Electricity|Gas|w/o CCS'	14	0	0	0	0	0	18	0	46	0	0	0	29		107			4			MESSAGE		MESSAGE
'Water Consumption|Electricity|Geothermal'	14	0	0	0	0	0	18	0	46	0	0	0	0		78			3			MESSAGE		MESSAGE
'Water Consumption|Electricity|Hydro'	14	0	0	0	0	0	18	0	46	0	0	0	29		107			4			MESSAGE		MESSAGE
'Water Consumption|Electricity|Non-Biomass Renewables'	14	0	0	0	0	0	18	0	46	0	0	0	29		107			4			MESSAGE		MESSAGE
'Water Consumption|Electricity|Nuclear'	14	0	0	0	0	0	18	0	46	0	0	0	29		107			4			MESSAGE		MESSAGE
'Water Consumption|Electricity|Oil'	14	0	0	0	0	0	18	0	46	0	0	0	29		107			4			MESSAGE		MESSAGE
'Water Consumption|Electricity|Oil|w/ CCS'	14	0	0	0	0	0	18	0	0	0	0	0	0		32			2			IMAGE		IMAGE
'Water Consumption|Electricity|Oil|w/o CCS'	14	0	0	0	0	0	18	0	0	0	0	0	29		61			3			WITCH		WITCH
'Water Consumption|Electricity|Once Through'	0	0	0	0	0	0	18	0	46	0	0	0	29		93			3			MESSAGE		MESSAGE
'Water Consumption|Electricity|Other'	0	0	0	0	0	0	18	0	46	0	0	0	0		64			2			MESSAGE		MESSAGE
'Water Consumption|Electricity|Sea Cooling'	0	0	0	0	0	0	18	0	46	0	0	0	29		93			3			MESSAGE		MESSAGE
'Water Consumption|Electricity|Solar'	0	0	0	0	0	0	18	0	46	0	0	0	29		93			3			MESSAGE		MESSAGE
'Water Consumption|Electricity|Solar|CSP'	0	0	0	0	0	0	18	0	46	0	0	0	29		93			3			MESSAGE		MESSAGE
'Water Consumption|Electricity|Solar|PV'	0	0	0	0	0	0	18	0	46	0	0	0	29		93			3			MESSAGE		MESSAGE
'Water Consumption|Electricity|Wet Tower'	0	0	0	0	0	0	18	0	46	0	0	0	29		93			3			MESSAGE		MESSAGE
'Water Consumption|Electricity|Wind'	14	0	0	0	0	0	18	0	46	0	0	0	0		78			3			MESSAGE		MESSAGE
'Water Consumption|Extraction'	0	0	0	0	0	0	0	0	46	0	0	0	0		46			1			MESSAGE		0
'Water Consumption|Extraction|Coal'	0	0	0	0	0	0	0	0	46	0	0	0	0		46			1			MESSAGE		0
'Water Consumption|Extraction|Gas'	0	0	0	0	0	0	0	0	46	0	0	0	0		46			1			MESSAGE		0
'Water Consumption|Extraction|Oil'	0	0	0	0	0	0	0	0	46	0	0	0	0		46			1			MESSAGE		0
'Water Consumption|Extraction|Uranium'	0	0	0	0	0	0	0	0	46	0	0	0	0		46			1			MESSAGE		0
'Water Consumption|Gases'	0	0	0	0	0	0	0	0	46	0	0	0	0		46			1			MESSAGE		0
'Water Consumption|Gases|Biomass'	0	0	0	0	0	0	0	0	46	0	0	0	0		46			1			MESSAGE		0
'Water Consumption|Gases|Coal'	0	0	0	0	0	0	0	0	46	0	0	0	0		46			1			MESSAGE		0
'Water Consumption|Heat'	0	0	0	0	0	0	0	0	46	0	0	0	0		46			1			MESSAGE		0
'Water Consumption|Heat|Biomass'	0	0	0	0	0	0	0	0	46	0	0	0	0		46			1			MESSAGE		0
'Water Consumption|Heat|Coal'	0	0	0	0	0	0	0	0	46	0	0	0	0		46			1			MESSAGE		0
'Water Consumption|Heat|Gas'	0	0	0	0	0	0	0	0	46	0	0	0	0		46			1			MESSAGE		0
'Water Consumption|Heat|Geothermal'	0	0	0	0	0	0	0	0	46	0	0	0	0		46			1			MESSAGE		0
'Water Consumption|Heat|Oil'	0	0	0	0	0	0	0	0	46	0	0	0	0		46			1			MESSAGE		0
'Water Consumption|Heat|Other'	0	0	0	0	0	0	0	0	46	0	0	0	0		46			1			MESSAGE		0
'Water Consumption|Hydrogen'	0	0	0	0	0	0	0	0	46	0	0	0	0		46			1			MESSAGE		0
'Water Consumption|Hydrogen|Biomass'	0	0	0	0	0	0	0	0	46	0	0	0	0		46			1			MESSAGE		0
'Water Consumption|Hydrogen|Biomass|w/ CCS'	0	0	0	0	0	0	0	0	46	0	0	0	0		46			1			MESSAGE		0
'Water Consumption|Hydrogen|Biomass|w/o CCS'	0	0	0	0	0	0	0	0	46	0	0	0	0		46			1			MESSAGE		0
'Water Consumption|Hydrogen|Coal'	0	0	0	0	0	0	0	0	46	0	0	0	0		46			1			MESSAGE		0
'Water Consumption|Hydrogen|Coal|w/ CCS'	0	0	0	0	0	0	0	0	46	0	0	0	0		46			1			MESSAGE		0
'Water Consumption|Hydrogen|Coal|w/o CCS'	0	0	0	0	0	0	0	0	46	0	0	0	0		46			1			MESSAGE		0
'Water Consumption|Hydrogen|Electricity'	0	0	0	0	0	0	0	0	46	0	0	0	0		46			1			MESSAGE		0
'Water Consumption|Hydrogen|Fossil'	0	0	0	0	0	0	0	0	46	0	0	0	0		46			1			MESSAGE		0
'Water Consumption|Hydrogen|Fossil|w/ CCS'	0	0	0	0	0	0	0	0	46	0	0	0	0		46			1			MESSAGE		0
'Water Consumption|Hydrogen|Fossil|w/o CCS'	0	0	0	0	0	0	0	0	46	0	0	0	0		46			1			MESSAGE		0
'Water Consumption|Hydrogen|Gas'	0	0	0	0	0	0	0	0	46	0	0	0	0		46			1			MESSAGE		0
'Water Consumption|Hydrogen|Gas|w/ CCS'	0	0	0	0	0	0	0	0	46	0	0	0	0		46			1			MESSAGE		0
'Water Consumption|Hydrogen|Gas|w/o CCS'	0	0	0	0	0	0	0	0	46	0	0	0	0		46			1			MESSAGE		0
'Water Consumption|Industrial Water'	14	0	0	0	0	0	17	0	0	0	0	0	0		31			2			IMAGE		IMAGE
'Water Consumption|Irrigation'	14	0	0	0	0	0	0	0	48	0	0	0	0		62			2			MESSAGE		MESSAGE
'Water Consumption|Liquids'	0	0	0	0	0	0	0	0	46	0	0	0	0		46			1			MESSAGE		0
'Water Consumption|Liquids|Biomass'	0	0	0	0	0	0	0	0	46	0	0	0	0		46			1			MESSAGE		0
'Water Consumption|Liquids|Biomass|w/ CCS'	0	0	0	0	0	0	0	0	46	0	0	0	0		46			1			MESSAGE		0
'Water Consumption|Liquids|Biomass|w/o CCS'	0	0	0	0	0	0	0	0	46	0	0	0	0		46			1			MESSAGE		0
'Water Consumption|Liquids|Coal'	0	0	0	0	0	0	0	0	46	0	0	0	0		46			1			MESSAGE		0
'Water Consumption|Liquids|Coal|w/ CCS'	0	0	0	0	0	0	0	0	46	0	0	0	0		46			1			MESSAGE		0
'Water Consumption|Liquids|Coal|w/o CCS'	0	0	0	0	0	0	0	0	46	0	0	0	0		46			1			MESSAGE		0
'Water Consumption|Liquids|Fossil'	0	0	0	0	0	0	0	0	46	0	0	0	0		46			1			MESSAGE		0
'Water Consumption|Liquids|Fossil|w/ CCS'	0	0	0	0	0	0	0	0	46	0	0	0	0		46			1			MESSAGE		0
'Water Consumption|Liquids|Fossil|w/o CCS'	0	0	0	0	0	0	0	0	46	0	0	0	0		46			1			MESSAGE		0
'Water Consumption|Liquids|Gas'	0	0	0	0	0	0	0	0	46	0	0	0	0		46			1			MESSAGE		0
'Water Consumption|Liquids|Gas|w/ CCS'	0	0	0	0	0	0	0	0	46	0	0	0	0		46			1			MESSAGE		0
'Water Consumption|Liquids|Gas|w/o CCS'	0	0	0	0	0	0	0	0	46	0	0	0	0		46			1			MESSAGE		0
'Water Consumption|Liquids|Oil'	0	0	0	0	0	0	0	0	46	0	0	0	0		46			1			MESSAGE		0
'Water Consumption|Municipal Water'	14	0	0	0	0	0	17	0	0	0	0	0	0		31			2			IMAGE		IMAGE
'Water Withdrawal'	14	0	0	0	0	0	8	0	46	0	0	0	29		97			4			MESSAGE		MESSAGE
'Water Withdrawal|Electricity'	14	0	0	0	0	0	20	0	46	0	0	0	29		109			4			MESSAGE		MESSAGE
'Water Withdrawal|Electricity|Biomass'	14	0	0	0	0	0	18	0	46	0	0	0	29		107			4			MESSAGE		MESSAGE
'Water Withdrawal|Electricity|Biomass|w/ CCS'	14	0	0	0	0	0	18	0	46	0	0	0	29		107			4			MESSAGE		MESSAGE
'Water Withdrawal|Electricity|Biomass|w/o CCS'	14	0	0	0	0	0	18	0	46	0	0	0	29		107			4			MESSAGE		MESSAGE
'Water Withdrawal|Electricity|Coal'	14	0	0	0	0	0	18	0	46	0	0	0	29		107			4			MESSAGE		MESSAGE
'Water Withdrawal|Electricity|Coal|w/ CCS'	14	0	0	0	0	0	18	0	46	0	0	0	29		107			4			MESSAGE		MESSAGE
'Water Withdrawal|Electricity|Coal|w/o CCS'	14	0	0	0	0	0	18	0	46	0	0	0	29		107			4			MESSAGE		MESSAGE
'Water Withdrawal|Electricity|Cooling Pond'	0	0	0	0	0	0	18	0	0	0	0	0	29		47			2			WITCH		WITCH
'Water Withdrawal|Electricity|Dry Cooling'	0	0	0	0	0	0	18	0	46	0	0	0	29		93			3			MESSAGE		MESSAGE
'Water Withdrawal|Electricity|Fossil'	14	0	0	0	0	0	18	0	0	0	0	0	29		61			3			WITCH		WITCH
'Water Withdrawal|Electricity|Fossil|w/ CCS'	14	0	0	0	0	0	18	0	46	0	0	0	29		107			4			MESSAGE		MESSAGE
'Water Withdrawal|Electricity|Fossil|w/o CCS'	14	0	0	0	0	0	18	0	46	0	0	0	29		107			4			MESSAGE		MESSAGE
'Water Withdrawal|Electricity|Gas'	14	0	0	0	0	0	18	0	46	0	0	0	29		107			4			MESSAGE		MESSAGE
'Water Withdrawal|Electricity|Gas|w/ CCS'	14	0	0	0	0	0	18	0	46	0	0	0	29		107			4			MESSAGE		MESSAGE
'Water Withdrawal|Electricity|Gas|w/o CCS'	14	0	0	0	0	0	18	0	46	0	0	0	29		107			4			MESSAGE		MESSAGE
'Water Withdrawal|Electricity|Geothermal'	14	0	0	0	0	0	10	0	46	0	0	0	0		70			3			MESSAGE		MESSAGE
[truncated: 70 more rows]

## Sheet: C4
	AIM	C-ROADS	COFFEE	EPPA	GCAM	GEM-E3	IMAGE	MERGE-ETL	MESSAGE	POLES	REMIND	TIAM	WITCH		Total number of scenarios			Number of models that report variable			Dominant Model		Dominant Model (>1 model)
[truncated: 1,447 more rows]

[truncated: 5 more sheets: C5, C6, C7, C8, readme]
