# Supplementary material for: Influence of individual models and studies on quantitative mitigation findings in the IPCC Sixth Assessment Report
Source: Research Square preprint supplement (doi:10.21203/rs.3.rs-5698716/v1), 2025-01-13
Supplement: Supplementary file 1 [file 829ab87d3215e18966e65733.pdf]

**Supplementary Information to ‘Influence of individual models and studies on quantitative mitigation findings in the IPCC Sixth Assessment Report’**

Ida Sognnaes\*, Glen P. Peters  
CICERO Center for International Climate Research, Oslo, Norway  
\*Corresponding author: [ida.sognnas@cicero.oslo.no](mailto:ida.sognnas@cicero.oslo.no)

**Contents**

Supplementary Figures ..... 2

Supplementary Tables..... 14

Supplementary Text..... 17

    Supplementary Text 1: ENGAGE study impact on median net-zero GHG year ..... 17

    Supplementary Text 2: Differences in variables reporting across models..... 17

References..... 18

Supplementary Figures

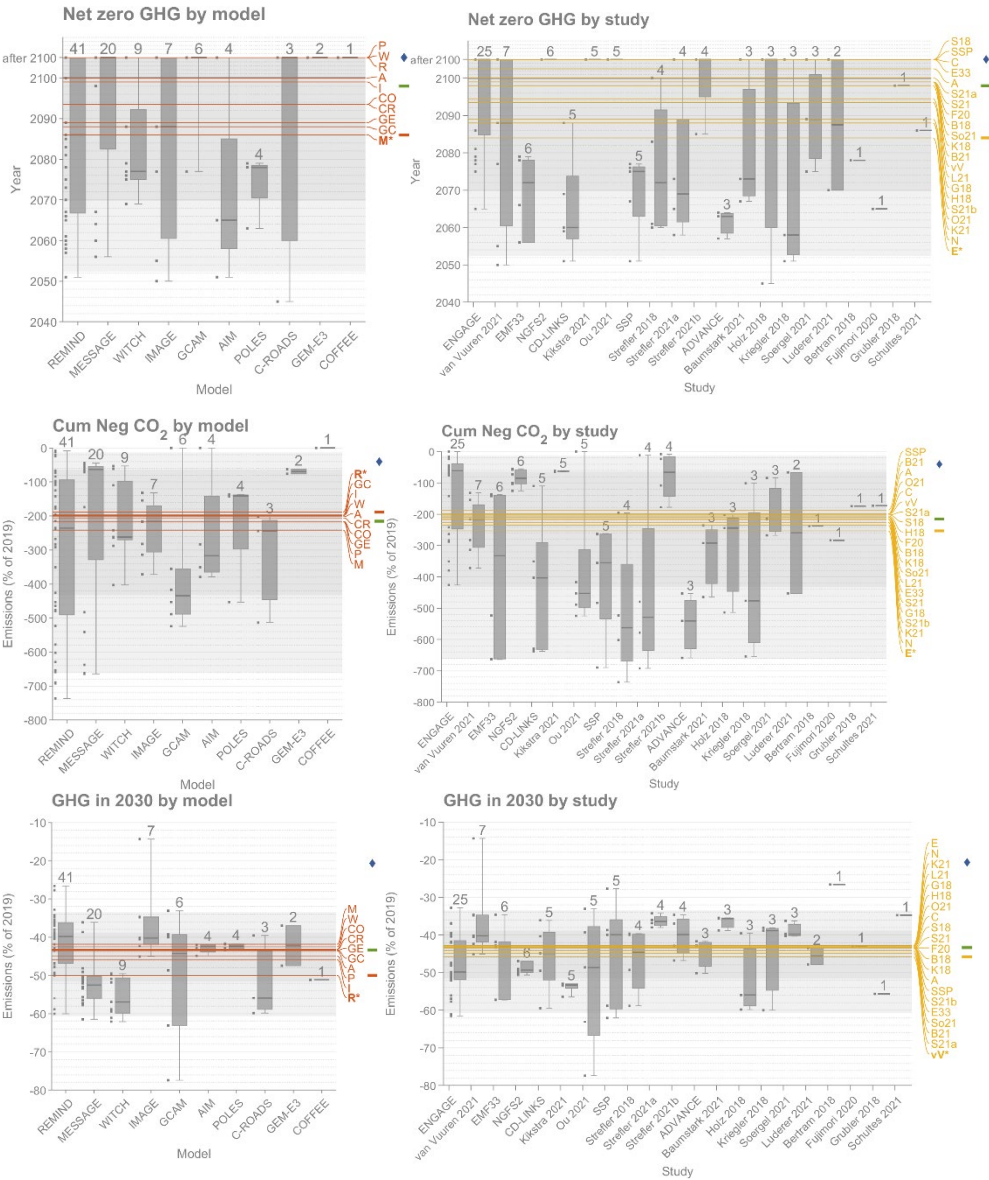

**SI Figure 1 Impact of removing individual models and studies on median values for all the AR6 WGIII SPM findings shown in Figure 3.** All variables are from scenarios that limit global warming to 1.5°C (>50%) (C1 category). Boxes show the minimum and maximum, interquartile ranges, and median of each model/study. The number of scenarios from each model/study is shown at the top of each box and the data points are shown to the left. Models and studies are ordered according to the number of scenarios, with the model/study with the most scenarios furthest left. Long, solid horizontal lines show median values when models (red) and studies (yellow) are removed one-by-one, with letters at the end of each line indicating the model/study that has been removed. Short, red and yellow horizontal lines to the right of the figures show the median values when the models/studies with the largest impact are removed. The letter for the corresponding model or study is bolded and starred. The short green lines show the reported 1.5°C medians and the blue diamonds show the reported 2°C medians. The dark grey background patches show the interquartile ranges and the light grey background patches show the 5<sup>th</sup>-95<sup>th</sup> percentile ranges. 'Net zero GHG' is the year of net zero GHG emissions. Values above 2100 on the y-axis indicate 'after 2100' which means zero was not reached before 2100 (and may not be reached, by scenario design). 'Neg CO<sub>2</sub>' is cumulative net-negative CO<sub>2</sub> emissions between the year of net zero and 2100. 'CCS' stands for Carbon Capture and Storage and 'wo' stands for without. Data: IPCC AR6 Scenarios Database (Byers et al., 2022).

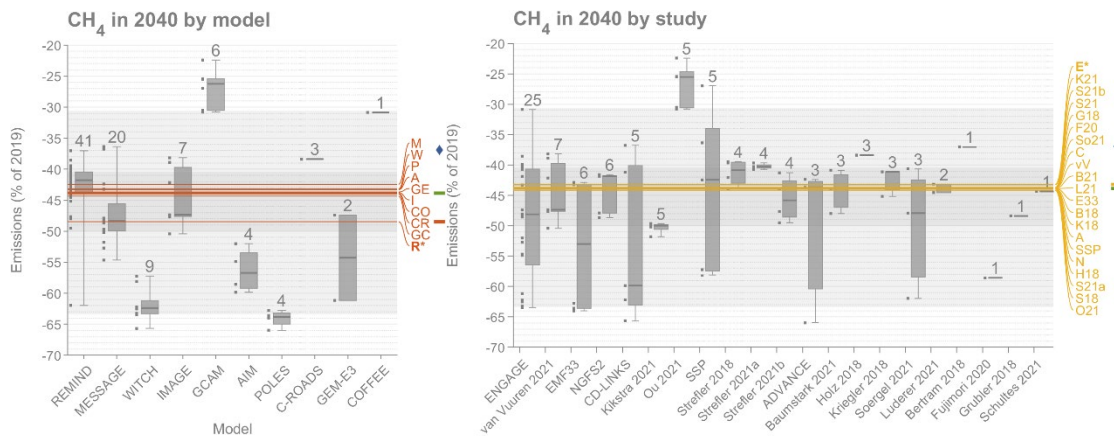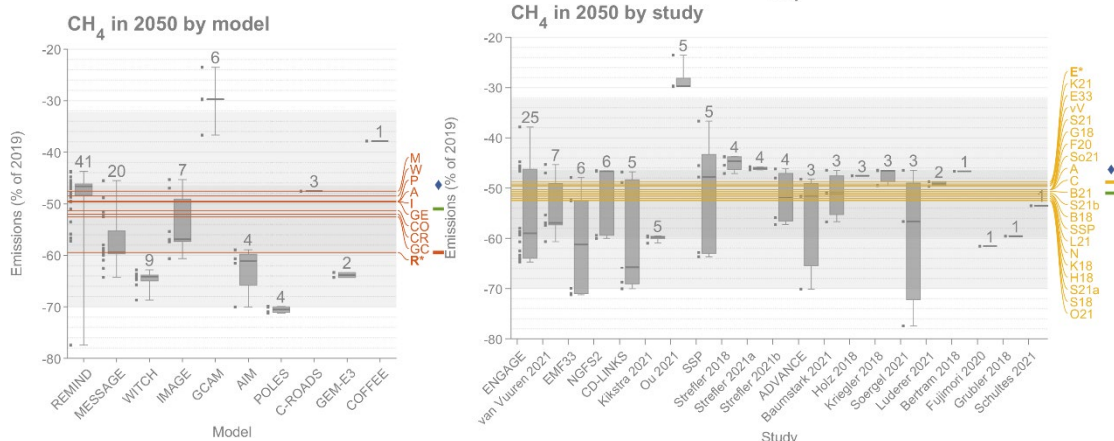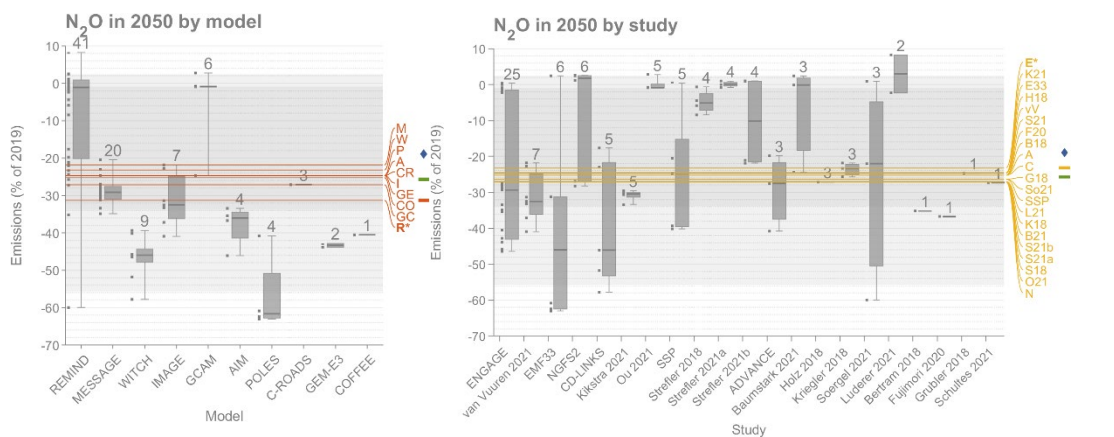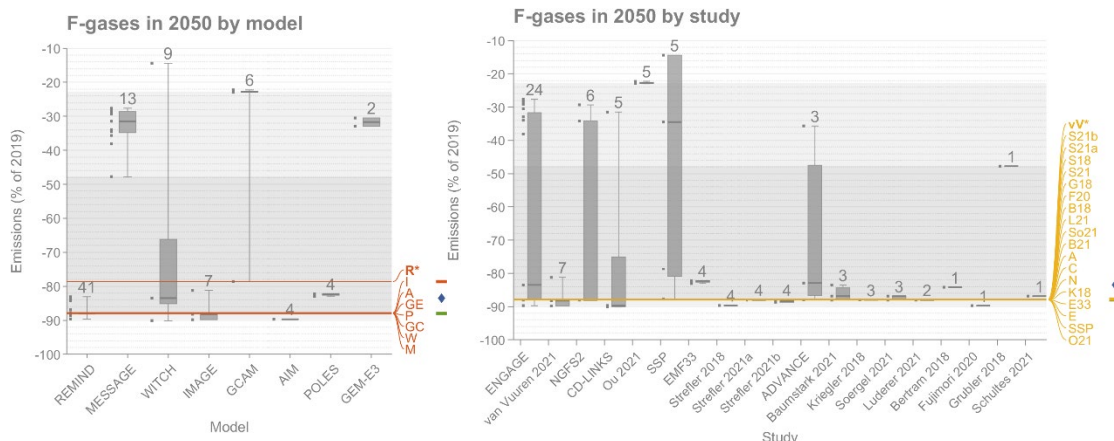

**SI Figure 1 (cont.)**

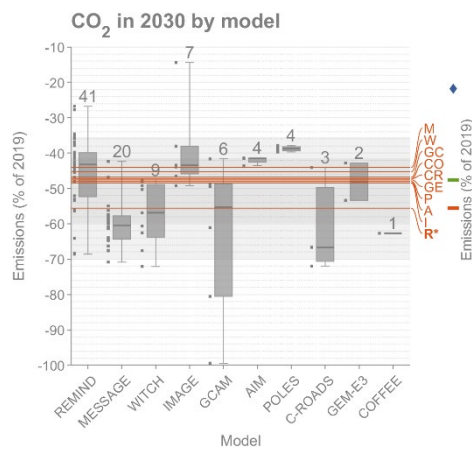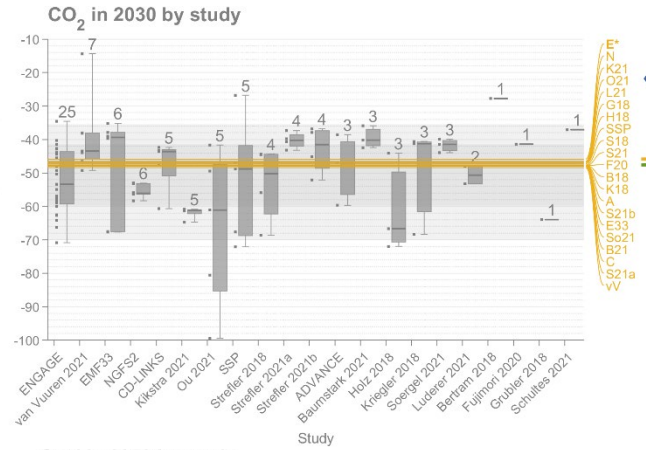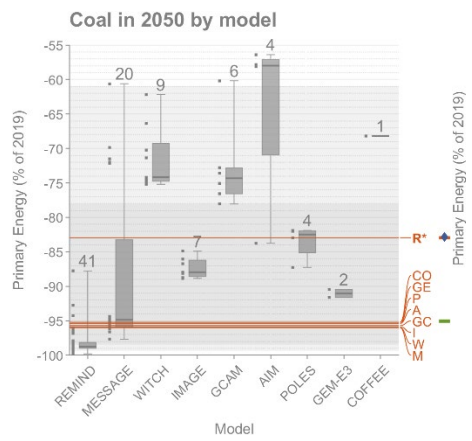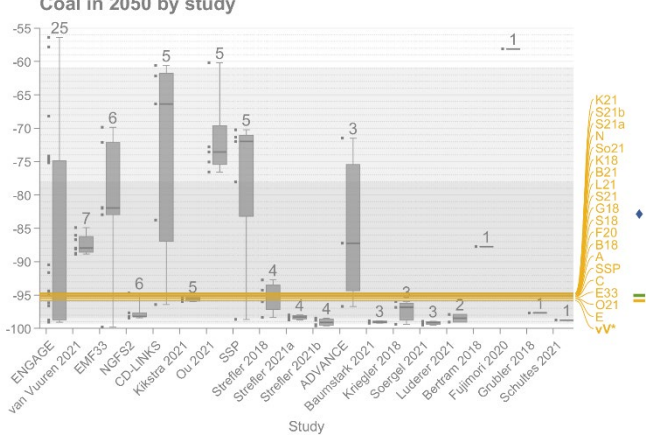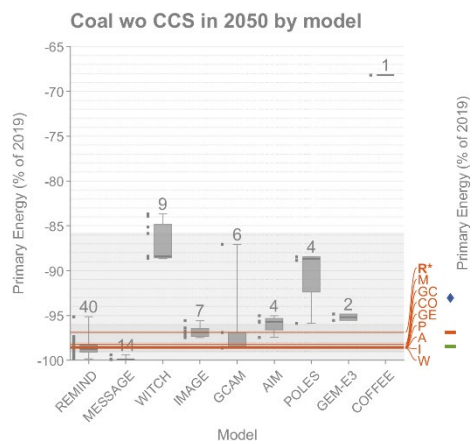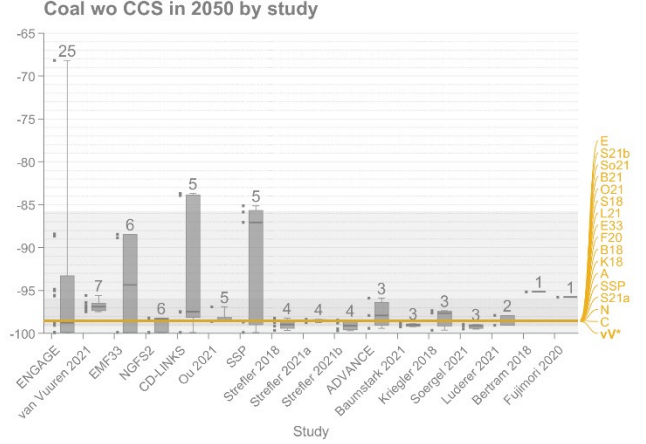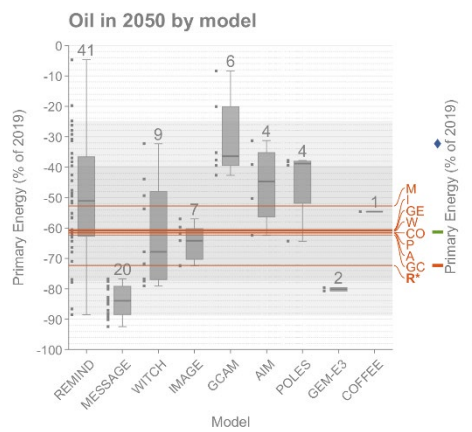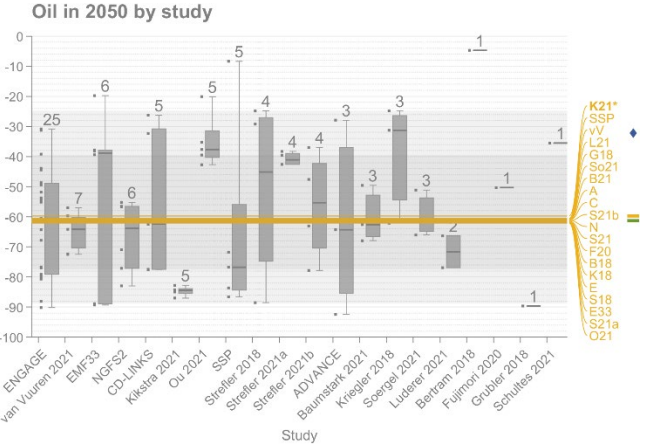

SI Figure 1 (cont.)



47

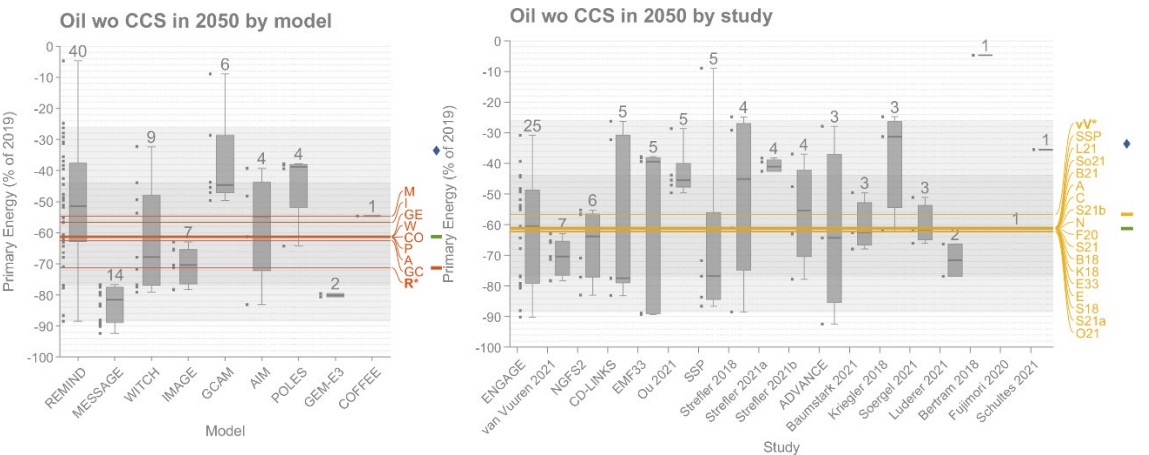

48

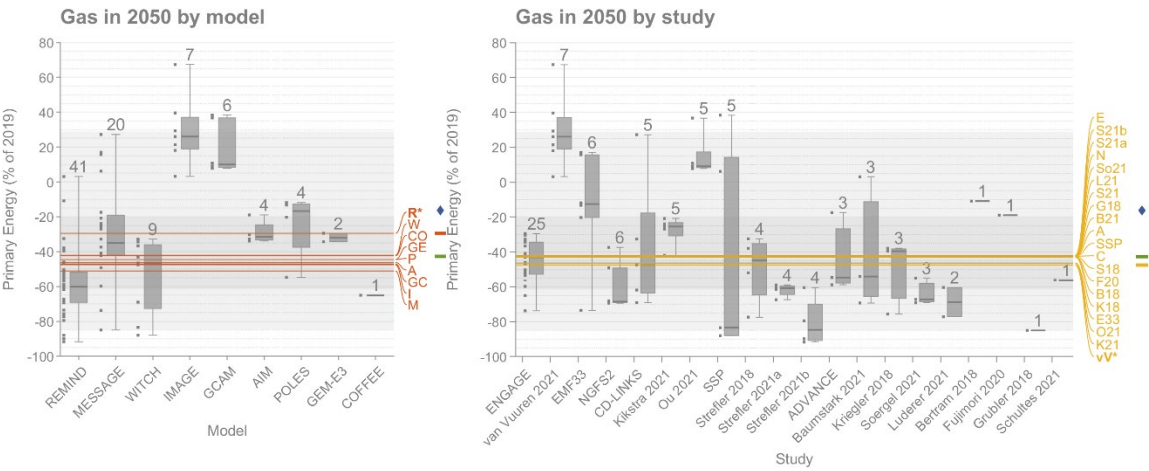

49

50 **SI Figure 1** (cont.)

51

52

53

54

55

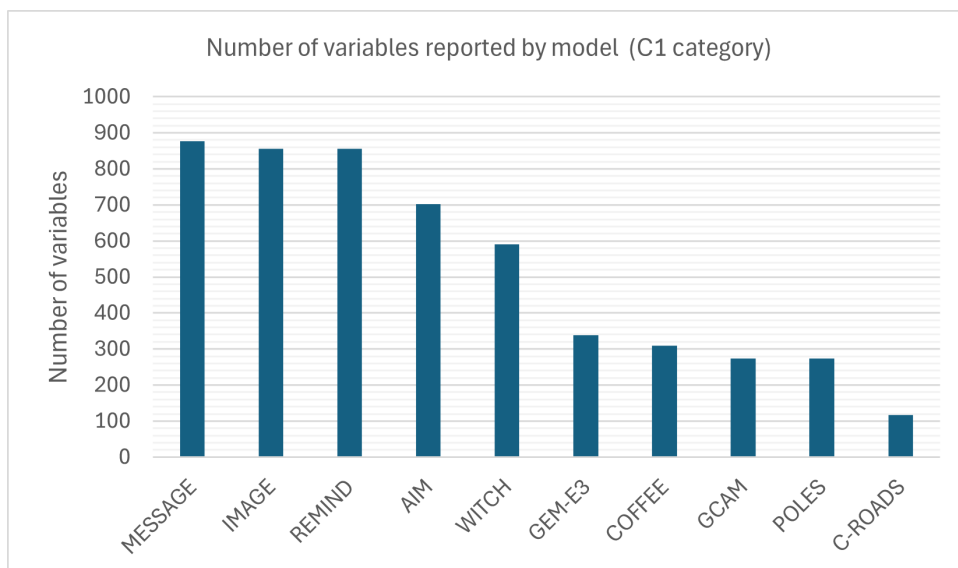

**SI Figure 2** Total number of scenario variables reported by each model (across all scenarios) in the C1 climate category (1.5°C scenarios with no or limited overshoot). Only scenarios that passed vetting and received a climate assessment are included. The total number of distinct variables in the database (reported by at least one model in at least one scenarios) is 1442. Data: IPCC AR6 Scenarios Database(Byers et al., 2022).

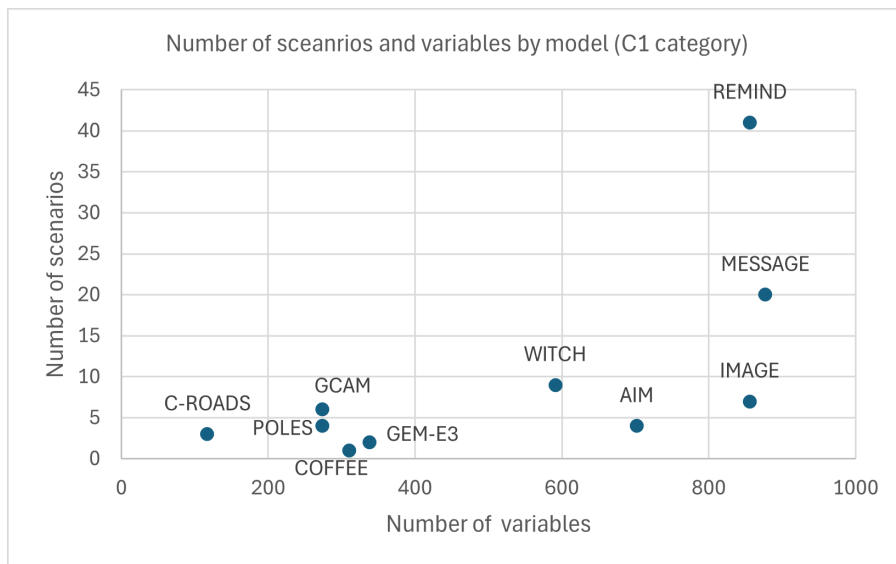

**SI Figure 3** Number of scenarios and number of variables by model in the C1 category. Data: IPCC AR6 Scenarios Database (Byers et al., 2022).

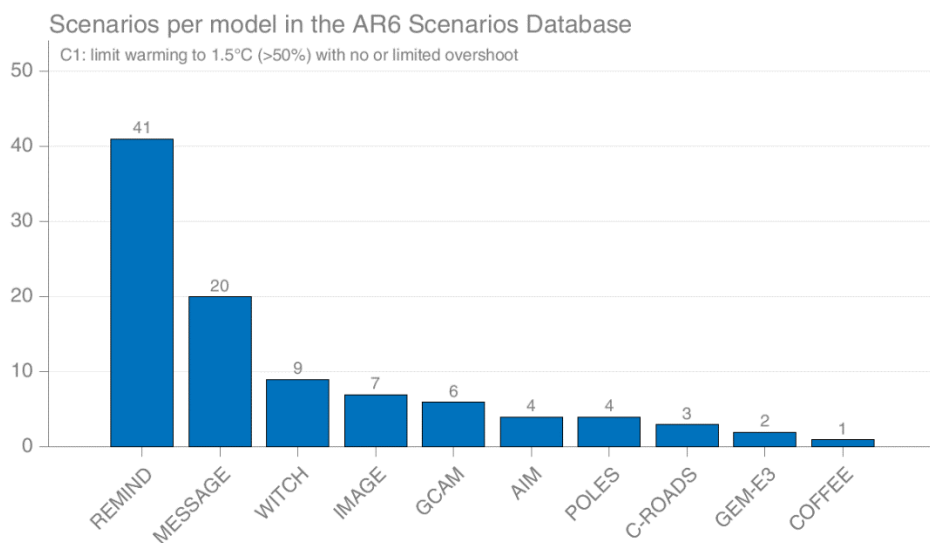

66

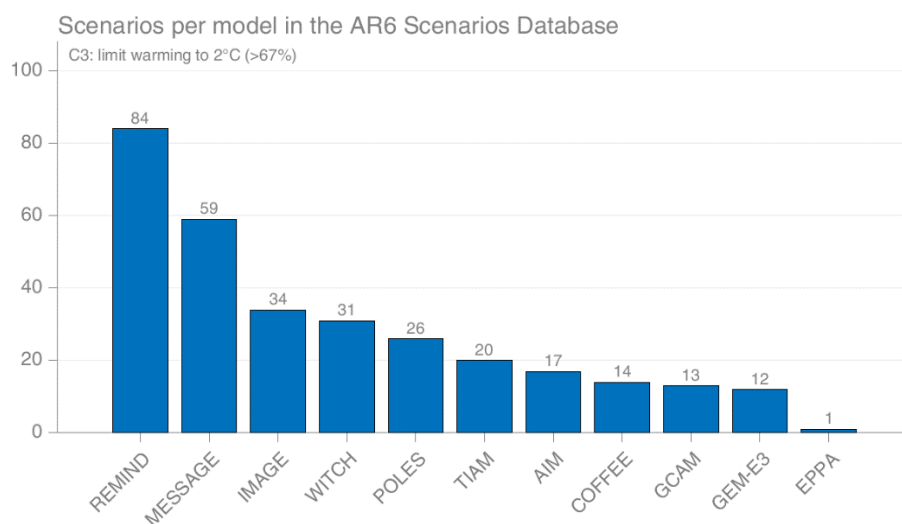

67

68 **SI Figure 4** Number of scenarios by model in the IPCC AR6 Scenarios Database in the C1 category (upper  
69 panel) and the C3 category (lower panel). Only scenarios that passed vetting and received a climate  
70 assessment are shown (97 scenarios in the C1 category and 311 scenarios in the C3 category). The scenario-  
71 based mitigation findings in the AR6 WGIII SPM are based on these scenarios. Data: IPCC AR6 Scenarios  
72 Database(Byers et al., 2022).

73



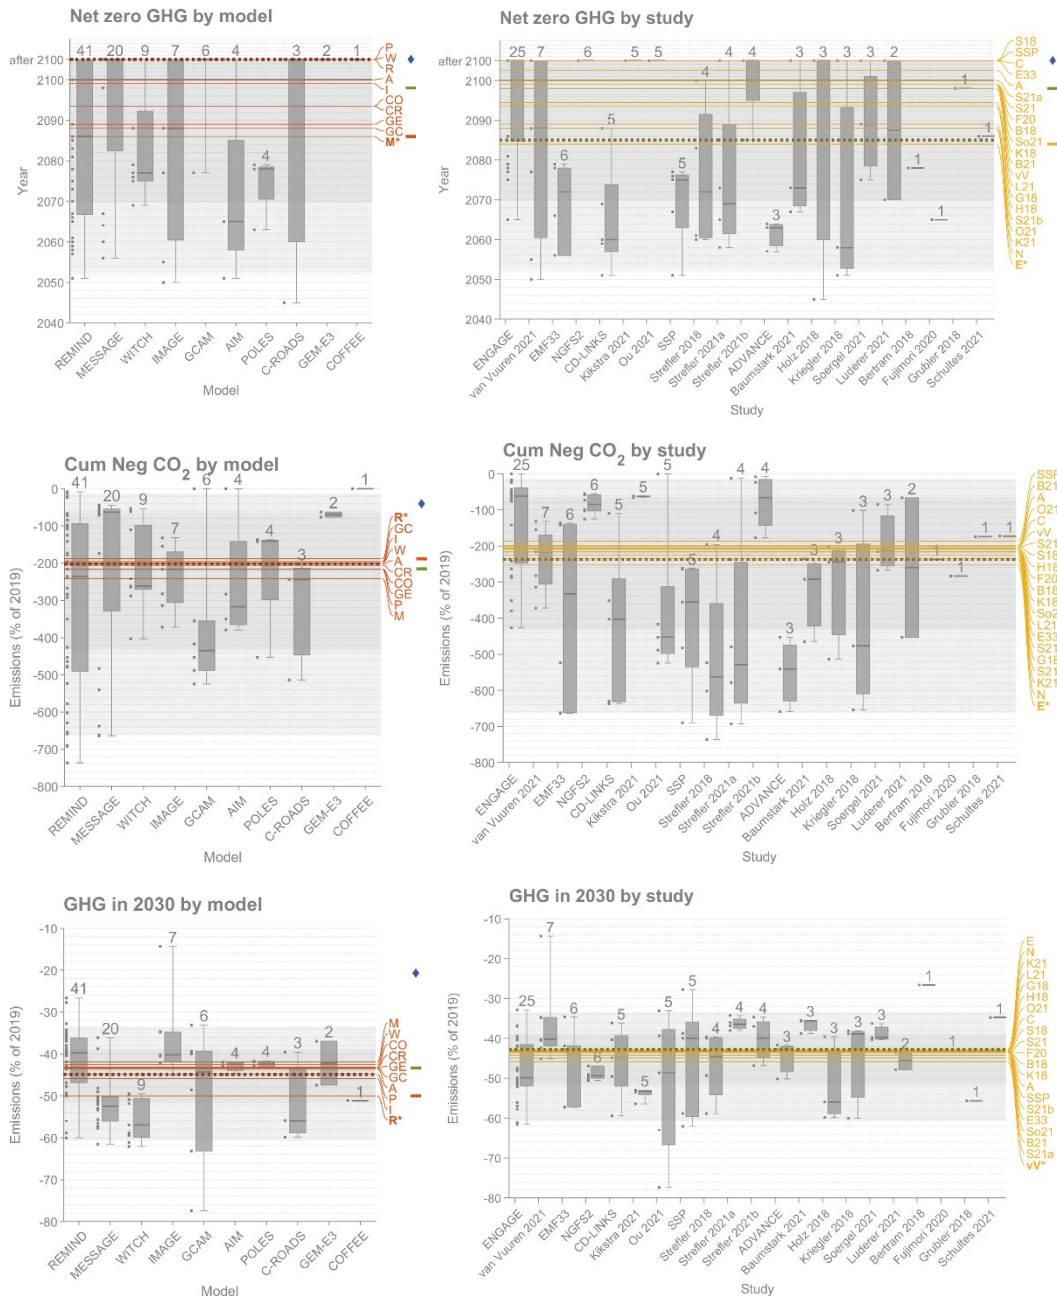

**SI Figure 5 Model- and study weighted medians for all AR6 WGIII SPM variables shown in Figure 3.** All variables are from scenarios that limit global warming to 1.5°C (>50%) (C1 category). Boxes show the minimum and maximum, interquartile ranges, and median of each model/study. The number of scenarios from each model/study is shown at the top of each box and the data points are shown to the left. Models and studies are ordered according to the number of scenarios, with the model/study with the most scenarios furthest left. Long, solid horizontal lines show median values when models (red) and studies (yellow) are removed one-by-one, with letters at the end of each line indicating the model/study that has been removed. Short, red and yellow horizontal lines to the right of the figures show the median values when the models/studies with the largest impact are removed. The letter for the corresponding model or study is bolded and starred. Long, dashed horizontal lines show medians weighted by model (red) and by study (yellow). The short green lines show the reported 1.5°C medians and the blue diamonds show the reported 2°C medians. The dark grey background patches show the interquartile ranges and the light grey background patches show the 5<sup>th</sup>-95<sup>th</sup> percentile ranges. 'Net zero GHG' is the year of net zero GHG emissions. Values above 2100 on the y-axis indicate 'after 2100' which means zero was not reached before 2100 (and may not be reached, by scenario design). 'Neg CO<sub>2</sub>' is cumulative net-negative CO<sub>2</sub> emissions between the year of net zero and 2100. 'CCS' stands for Carbon Capture and Storage and 'wo' stands for without. Data: IPCC AR6 Scenarios Database (Byers et al., 2022).

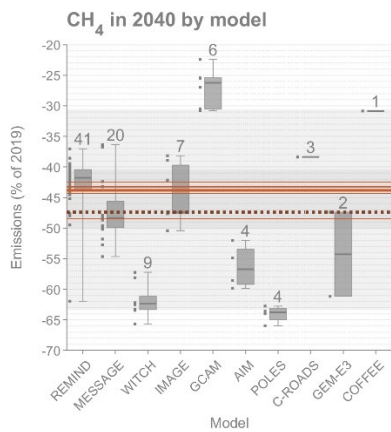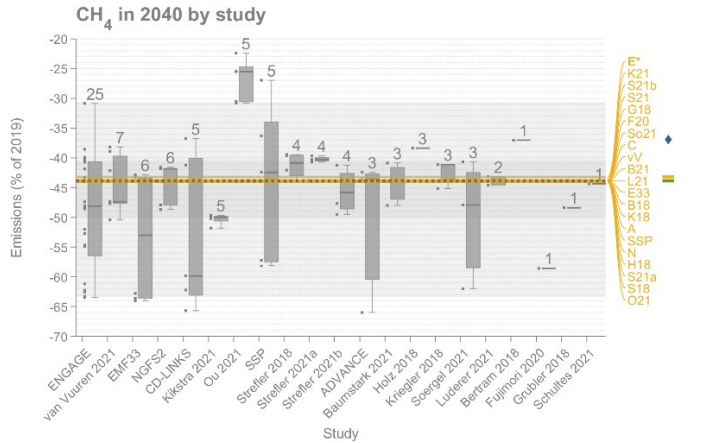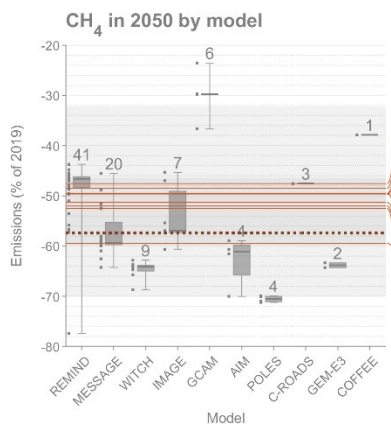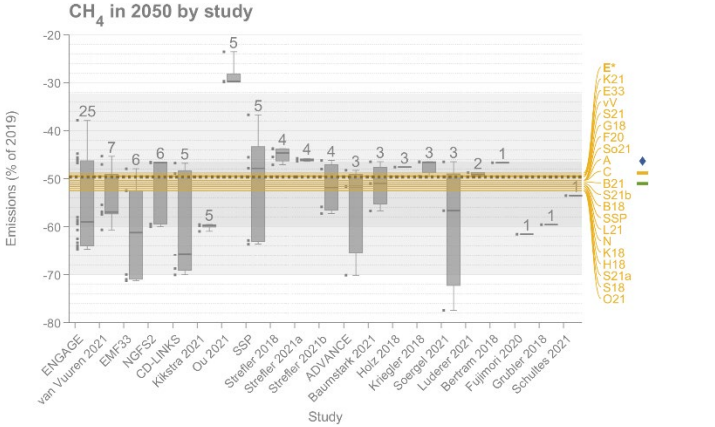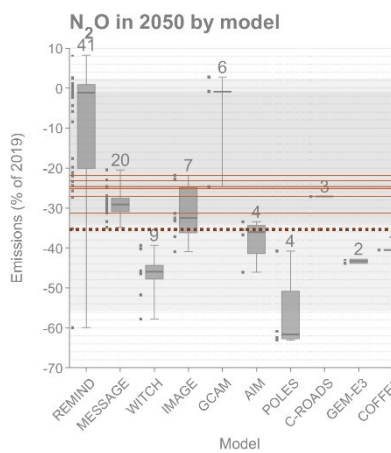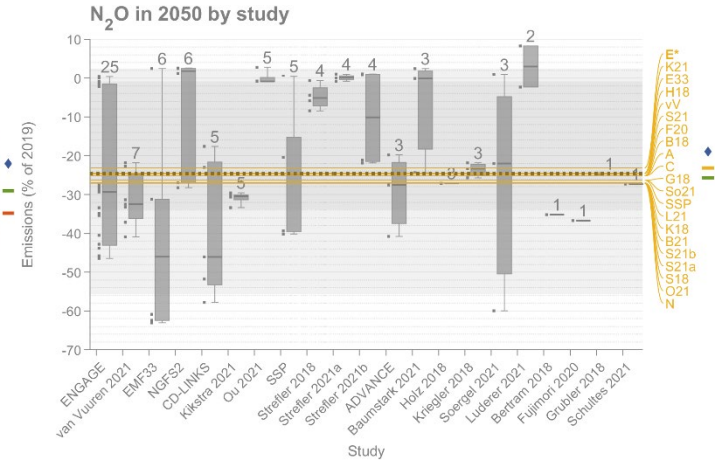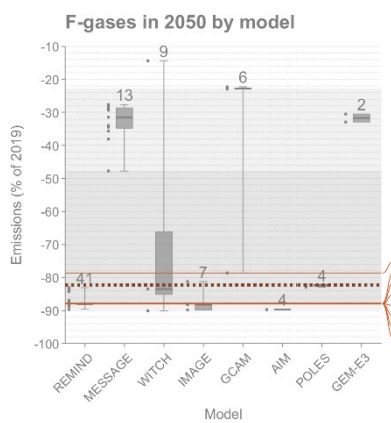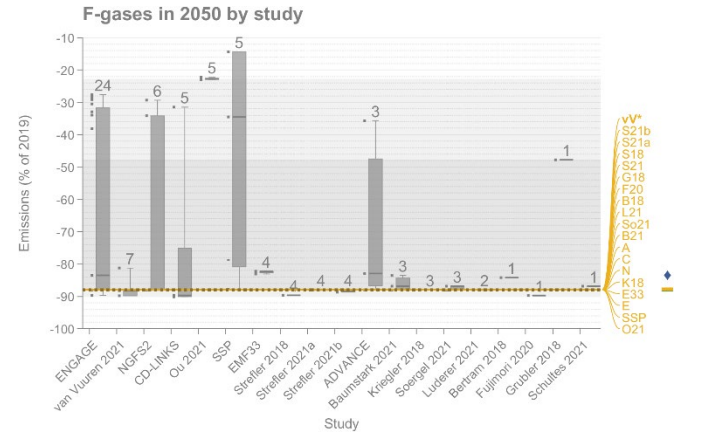

**SI Figure 5 (cont.)**

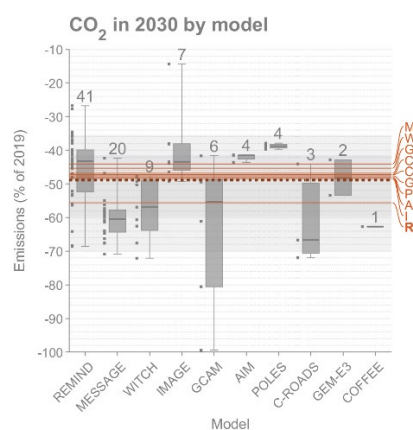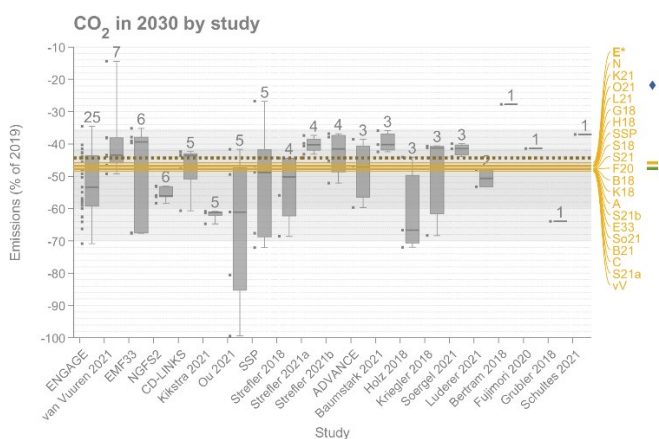

99

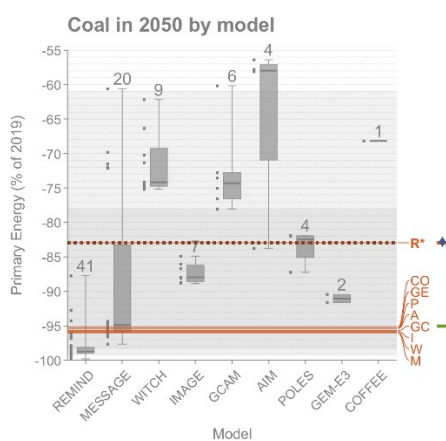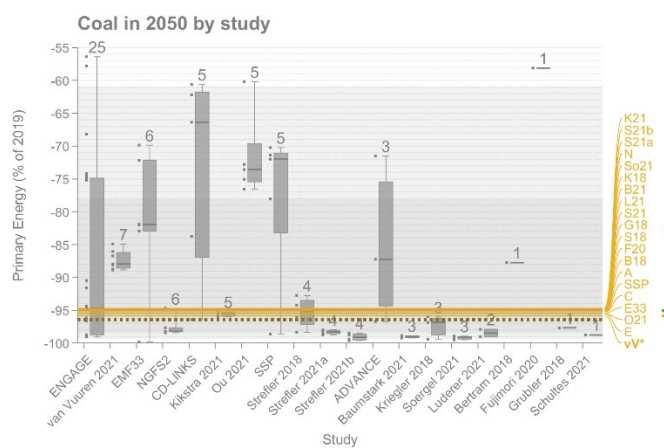

100

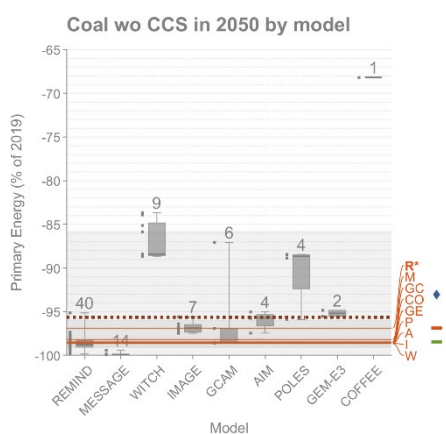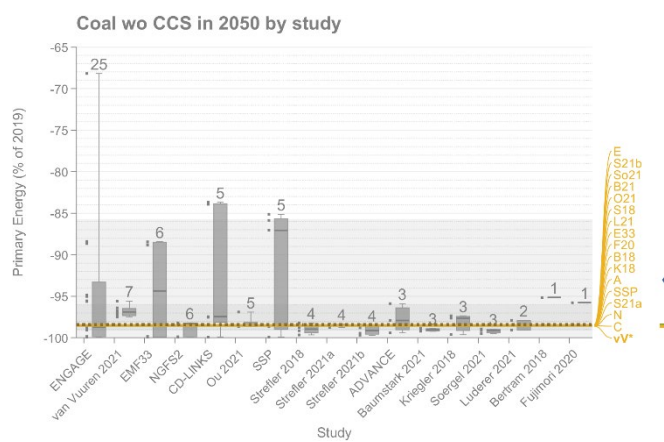

101

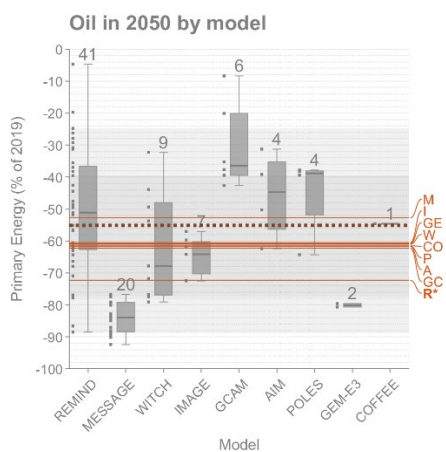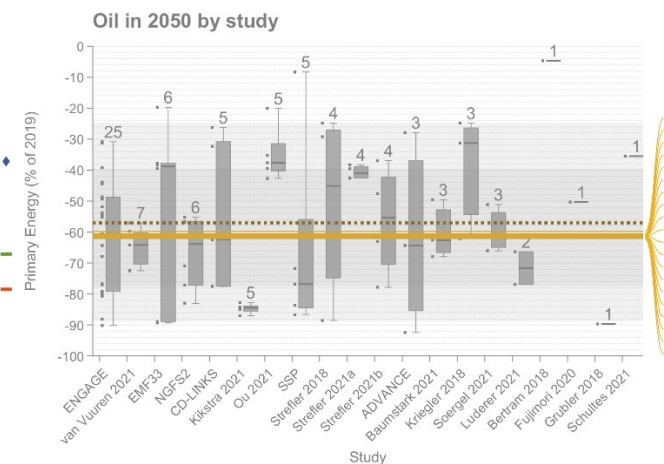

102

103 **SI Figure 5** (cont.)



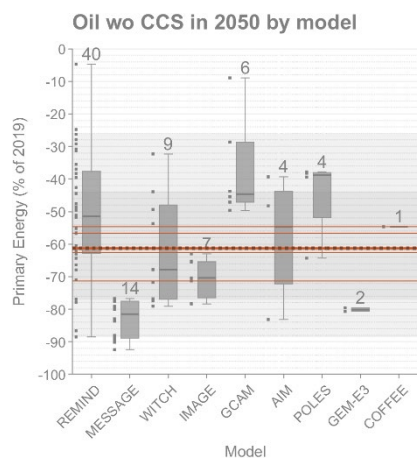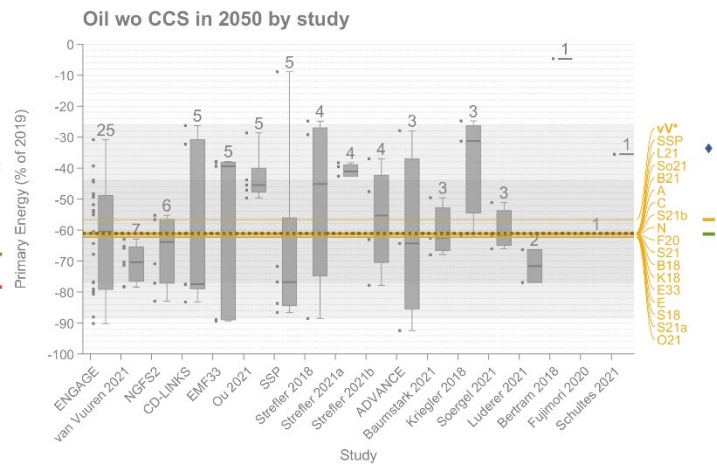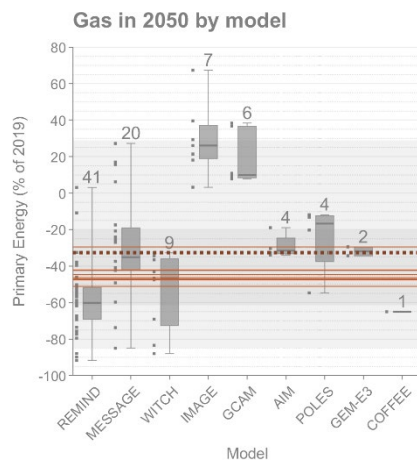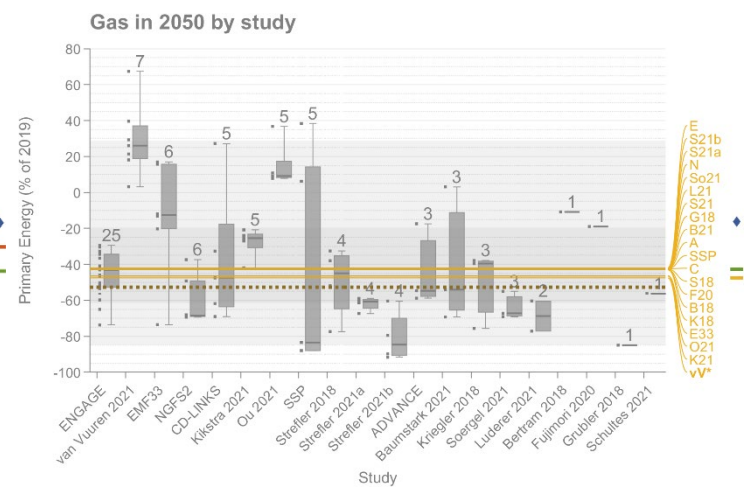

SI Figure 5 (cont.)

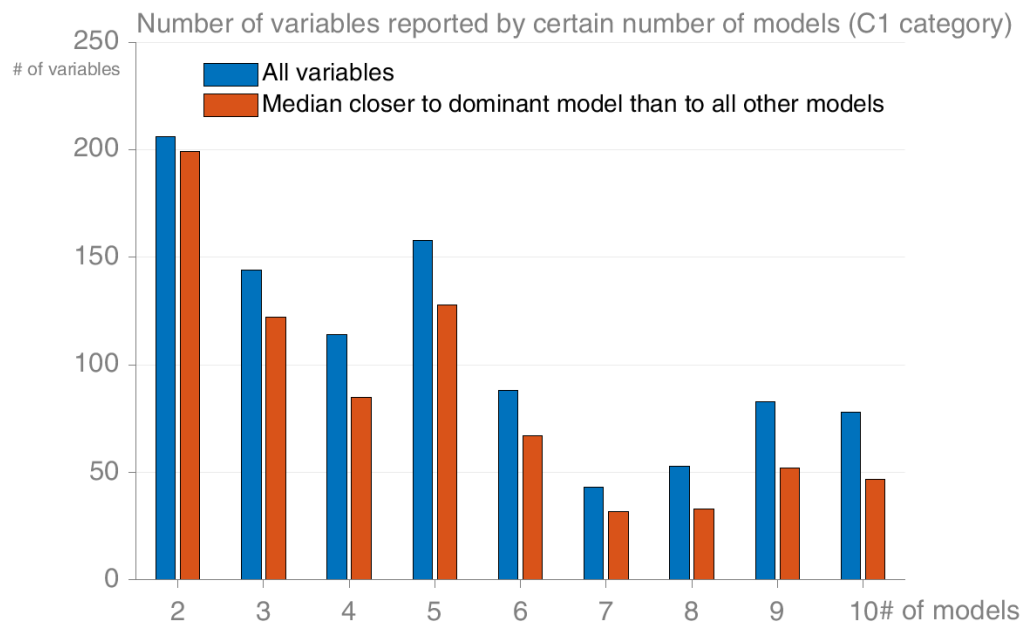

**SI Figure 6** Number of variables in the C1 category (1.5°C scenarios with no or limited overshoot) reported by a certain number of models. The total number of variables reported by a certain number of models is shown by the blue bars. The number of variables for which the median is closer to the median of the dominant model than to the median of all the other models is shown by the red bars. Data: IPCC AR6 Scenarios Database (Byers et al., 2022).

114

115 **Supplementary Tables**

116 **SI Table 1** Models contributing with global scenarios in the AR6 scenarios database and number of scenarios  
 117 from each model in each scenario category (All, Vetted, Vetted and Climate assessed). The 13 models  
 118 responsible for the scenarios that passed vetting and received a climate category are shaded green.

| Model Name                    | Number of scenarios in different climate categories |                  |                                |
|-------------------------------|-----------------------------------------------------|------------------|--------------------------------|
|                               | All scenarios                                       | Vetted Scenarios | Vetted with Climate Assessment |
| AIM                           | 165                                                 | 62               | 55                             |
| BET                           | 16                                                  |                  |                                |
| C-GEM                         | 32                                                  | 32               |                                |
| C-ROADS                       | 6                                                   | 6                | 6                              |
| C3IAM                         | 14                                                  | 5                |                                |
| CGE-MOD                       | 32                                                  | 32               |                                |
| COFFEE                        | 84                                                  | 65               | 65                             |
| DART                          | 32                                                  | 17               |                                |
| DNE21+                        | 49                                                  | 9                |                                |
| E3ME                          | 10                                                  | 10               |                                |
| EC-MSMR                       | 32                                                  | 32               |                                |
| EDF-GEPA                      | 32                                                  | 32               |                                |
| EDGE-Buildings                | 16                                                  | 8                |                                |
| ENV-Linkages                  | 15                                                  | 7                |                                |
| ENVISAGE                      | 32                                                  | 32               |                                |
| EPPA                          | 10                                                  | 7                | 7                              |
| En-ROADS                      | 3                                                   |                  |                                |
| FARM                          | 13                                                  |                  |                                |
| GAINS                         | 2                                                   | 2                |                                |
| GCAM                          | 157                                                 | 79               | 48                             |
| GEM-E3                        | 52                                                  | 45               | 41                             |
| GEMINI-E3                     | 6                                                   | 6                |                                |
| GENeSYS-MOD                   | 1                                                   | 1                |                                |
| GMM-17                        | 4                                                   | 4                |                                |
| GRAPE                         | 18                                                  |                  |                                |
| Global TIMES                  | 14                                                  |                  |                                |
| Global Transportation Roadmap | 4                                                   | 4                |                                |
| HEB                           | 2                                                   |                  |                                |
| ICES-EMF                      | 32                                                  | 32               |                                |
| ICES-XPS                      | 11                                                  |                  |                                |
| IEA                           | 1                                                   | 1                |                                |
| IIASAPOP                      | 5                                                   |                  |                                |
| IMACLIM                       | 71                                                  | 31               |                                |
| IMAGE                         | 156                                                 | 144              | 142                            |
| LUT-ESTM                      | 1                                                   |                  |                                |
| MAgPIE                        | 3                                                   | 3                |                                |
| MERGE-ETL                     | 3                                                   | 1                | 1                              |
| MESSAGE                       | 297                                                 | 266              | 266                            |
| MIGRATION                     | 10                                                  | 10               |                                |
| MUSE                          | 11                                                  | 5                |                                |
| McKinsey                      | 3                                                   |                  |                                |
| POLES                         | 138                                                 | 115              | 114                            |
| PROMETHEUS                    | 7                                                   | 7                |                                |
| REMIND                        | 323                                                 | 297              | 297                            |
| REmap                         | 2                                                   | 2                |                                |
| SNOW_GL_HH_v1                 | 32                                                  | 32               |                                |
| Shell                         | 1                                                   |                  |                                |
| TEA                           | 32                                                  | 32               |                                |
| TIAM                          | 95                                                  | 62               | 45                             |
| WEGDYN                        | 32                                                  | 32               |                                |
| WEM                           | 2                                                   | 2                |                                |
| WITCH                         | 176                                                 | 115              | 115                            |
| <b># Scenarios</b>            | <b>2297</b>                                         | <b>1686</b>      | <b>1202</b>                    |
| <b># Models</b>               | <b>52</b>                                           | <b>41</b>        | <b>13</b>                      |



**SI Table 2** Model names used in the analysis and corresponding acronyms used in the figures and Table 1. Model names are based on the full model names in the AR6 scenarios database as shown in this table. The unique model names listed here include all models that contributed with at least one scenario that passed vetting and received a climate category. The full model names listed include all the models that contributed with scenarios to the AR6 Scenarios Database, including model versions that contributed with scenarios that did not pass vetting and did not receive a climate assessment.

| Model name (unique) | Acronyms used in figures | Full model names in AR6 Scenarios Database                                                                                                                                                                                   |
|---------------------|--------------------------|------------------------------------------------------------------------------------------------------------------------------------------------------------------------------------------------------------------------------|
| AIM                 | A                        | AIM/CGE 2.0, AIM/CGE 2.1, AIM/CGE 2.2, AIM/Hub-Global 2.0                                                                                                                                                                    |
| C-ROADS             | CR                       | C-ROADS-5.005                                                                                                                                                                                                                |
| COFFEE              | CO                       | COFFEE 1.1, COPPE-COFFEE 1.0                                                                                                                                                                                                 |
| EPPA                |                          | EPPA 6                                                                                                                                                                                                                       |
| GCAM                | GC                       | GCAM 4.0, GCAM 4.2, GCAM 5.2, GCAM 5.3, GCAM5.2_NET, GCAM-PR 5.3                                                                                                                                                             |
| GEM-E3              | GE                       | GEM-E3 V1, GEM-E3_V2021,                                                                                                                                                                                                     |
| IMAGE               | I                        | IMAGE 3.0, IMAGE 3.0.1, IMAGE 3.0.2, IMAGE 3.2,                                                                                                                                                                              |
| MERGE-ETL           |                          | MERGE-ETL 6.0,                                                                                                                                                                                                               |
| MESSAGE             | M                        | MESSAGE V.3, MESSAGE-GLOBIOM 1.0, MESSAGEix-GLOBIOM 1.0, MESSAGEix-GLOBIOM_1.1, MESSAGEix-GLOBIOM_1.2, MESSAGEix-GLOBIOM_GEI 1.0, MESSAGE-Transport V.5                                                                      |
| POLES               | P                        | POLES ADVANCE, POLES CD-LINKS, POLES EMF30, POLES EMF33, POLES ENGAGE, POLES GECO2019,                                                                                                                                       |
| REMIND              | R                        | REMIND 1.6, REMIND 1.7, REMIND 2.1, REMIND_EU 2.0, REMIND-Buildings 2.0, REMIND-H13 2.1, REMIND-MAGPIE 1.5, REMIND-MAGPIE 1.7-3.0, REMIND-MAGPIE 2.0-4.1, REMIND-MAGPIE 2.1-4.2, REMIND-MAGPIE 2.1-4.3, REMIND-Transport 2.1 |
| TIAM                |                          | TIAM-ECN 1.1, TIAM-ECN AFR 1.1, TIAM-ECN KEN 1.1, TIAM-ECN ETH 1.1, TIAM-ECN MDG 1.1, TIAM-Grantham 1.0, TIAM-Grantham 3.2, TIAM-UCL 4.1.1, TIAM-WORLD 1.0                                                                   |
| WITCH               | W                        | WITCH 4.6, WITCH 5.0, WITCH-GLOBIOM 3.1, WITCH-GLOBIOM 4.2, WITCH-GLOBIOM 4.4                                                                                                                                                |

**SI Table 3** Study names used in the analysis and corresponding acronyms used in the figures and Table 1. All study names are the same as the 'project\_study' given in the AR6 scenarios database metadata.

| Study name (unique) (same as the 'project_study' in the AR6 Scenarios Database) | Acronyms used in the figures |
|---------------------------------------------------------------------------------|------------------------------|
| ADVANCE                                                                         | A                            |
| Bauer 2020                                                                      |                              |
| Baumstark 2021                                                                  | B21                          |
| Bertram 2018                                                                    | B18                          |
| CD-LINKS                                                                        | C                            |
| COMMIT                                                                          |                              |
| EMF30                                                                           |                              |
| EMF33                                                                           | E33                          |
| Emmerling 2019                                                                  |                              |
| ENGAGE                                                                          | E                            |
| Fujimori 2020                                                                   | F20                          |
| Giannousakis 2020                                                               |                              |
| Grubler 2018                                                                    | G18                          |
| Guo 2021                                                                        |                              |
| Holz 2018                                                                       | H18                          |
| Kikstra 2021                                                                    | K21                          |
| Kriegler 2018                                                                   | K18                          |
| Levesque 2021                                                                   |                              |
| Luderer 2021                                                                    | L21                          |
| Marcucci 2017                                                                   |                              |
| NGFS2                                                                           | N                            |
| Ou 2021                                                                         | O21                          |
| PR Policy MIP                                                                   |                              |
| Rottoli 2021                                                                    |                              |
| Schultes 2021                                                                   | S21                          |
| Soergel 2021                                                                    | So21                         |
| SSP                                                                             | SSP                          |
| Streffer 2018                                                                   | S18                          |
| Streffer 2021a                                                                  | S21a                         |
| Streffer 2021b                                                                  | S21b                         |
| Van Vuuren 2021                                                                 | vV                           |

## Supplementary Text

### Supplementary Text 1: ENGAGE study impact on median net-zero GHG year

The ENGAGE study (Riahi et al., 2021) had a goal to explore emission scenarios with less temperature overshoot. To do this the ENGAGE ran two types of mitigation scenarios: 1) a conventional scenario with a 2100 cumulative CO<sub>2</sub> budget that allowed net-negative CO<sub>2</sub> emissions in the second half the century and thereby temperature overshoot, 2) a scenario with the same cumulative CO<sub>2</sub> emissions, but a constraint that required CO<sub>2</sub> emissions to not go below zero, thereby minimising temperature overshoot. The study included nine IAMs and used around 17 cumulative CO<sub>2</sub> budget constraints, and in addition to the two types of mitigation scenarios, included baseline and policy scenarios. Consequently, the study generated hundreds of scenarios, 591 of the 1202 scenarios in the vetted and climate assessed IPCC database.

The ENGAGE scenario design has a direct impact on the year of net zero GHG emissions: Most (not all) of the conventional scenarios reach net zero GHG emissions before 2100, while none of the constrained scenarios achieve net zero GHG emissions. The net zero CO<sub>2</sub> emission year is less impacted, as all scenarios reach net zero CO<sub>2</sub> emissions. They then either continue to net negative CO<sub>2</sub> emissions or maintain net zero CO<sub>2</sub> emissions until 2100. These latter scenarios have positive GHG emissions to 2100 since non-CO<sub>2</sub> emissions are non-zero.

The large number of scenarios from the ENGAGE study, with two very specific scenario designs, in the database explains the large impact on median net-zero GHG year from the ENGAGE study. Hypothetically, if all scenario combinations were run by all models, the distribution of net zero CO<sub>2</sub> or GHG years would be purely bimodal with the median between the two modes. This in itself is a demonstration of the challenge in using statistical distributions of the scenarios database.

### Supplementary Text 2: Differences in variables reporting across models

Because different models report different variables (SI Figure 2) and no models report all variables, the model with the most scenarios in the C1 and C3 categories (SI Figure 4), is not the dominant model for every variable (Supplementary Data 1). That different variables are reported by different models has two implications. First, it means that the number of models that report a variable depends on the variable (SI Figure 2). When only a few models report a variable, the impact on the median of the dominant model is generally larger. In the C1 category, many variables are reported by only a few models, and for these variables, the median is almost always closer to the dominant model than to all the other models (SI Figure 6). But even for the variables that are reported by all or most of the models in the C1 category, the median is closer to the median of the dominant model than to the median of all the other models in most cases (SI Figure 6). Second, it means that the number of variables reported by different models plays a role. In general, models that report more variables are likely to be the dominant model for more variables. In the C1 category, for example, IMAGE is the dominant model for more variables than WITCH, even though the two models have a similar number of scenarios (Figure 4, SI Figure 4). This is because IMAGE reports more variables than WITCH and because many of the variables reported by IMAGE are less frequently reported by models with even more scenarios (REMIND, MESSAGE and WITCH), making IMAGE the dominant model for these (Supplementary Data 1). Still, even though MESSAGE and IMAGE both report the same or more variables than REMIND, the large fraction of scenarios from REMIND in the C1

category (41 out of 97) means that REMIND is the most common dominant model in significantly more cases. In general, models with more scenarios tend to also report more variables, which means that these two effects go in the same direction (SI Figure 3). But overall, the number of scenarios (SI Figure 4) is a better predictor of model dominance (Figure 4) than the number of variables reported (SI Figure 2).

## References

- Byers, E., Krey, V., Kriegler, E., Riahi, K., Schaeffer, R., Kikstra, J., Lamboll, R., Nicholls, Z., Sandstad, M., Smith, C., van der Wijst, K., Al -Khourdajie, A., Lecocq, F., Portugal-Pereira, J., Saheb, Y., Stromman, A., Winkler, H., Auer, C., Brutschin, E., ... van Vuuren, D. (2022). *AR6 Scenarios Database*. <https://doi.org/10.5281/ZENODO.7197970>
- Riahi, K., Bertram, C., Huppmann, D., Rogelj, J., Bosetti, V., Cabardos, A. M., Deppermann, A., Drouet, L., Frank, S., Fricko, O., Fujimori, S., Harmsen, M., Hasegawa, T., Krey, V., Luderer, G., Paroussos, L., Schaeffer, R., Weitzel, M., van der Zwaan, B., ... Zakeri, B. (2021). Cost and attainability of meeting stringent climate targets without overshoot. *Nature Climate Change*, 11(12), 1063-1069. <https://doi.org/10.1038/s41558-021-01215-2>
