# Supplementary material for: Influence of individual models and studies on quantitative mitigation findings in the IPCC Sixth Assessment Report
Source: Research Square preprint supplement (doi:10.21203/rs.3.rs-5698716/v1), 2025-01-13
Supplement: Supplementary file 2 [file 552bc001762de5699081ff4f.xlsx]

## Sheet: Core variables
Variable	Tier 1	Tier 2	Core'
'AR6 climate diagnostics|Effective Radiative Forcing|Basket|Greenhouse Gases|CICERO-SCM|50.0th Percentile'	0	0	0
'AR6 climate diagnostics|Effective Radiative Forcing|Basket|Greenhouse Gases|FaIRv1.6.2|50.0th Percentile'	0	0	0
'AR6 climate diagnostics|Effective Radiative Forcing|Basket|Non-CO2 Greenhouse Gases|CICERO-SCM|50.0th Percentile'	0	0	0
'AR6 climate diagnostics|Effective Radiative Forcing|Basket|Non-CO2 Greenhouse Gases|FaIRv1.6.2|50.0th Percentile'	0	0	0
'AR6 climate diagnostics|Effective Radiative Forcing|CH4|CICERO-SCM|50.0th Percentile'	0	0	0
'AR6 climate diagnostics|Effective Radiative Forcing|CH4|FaIRv1.6.2|50.0th Percentile'	0	0	0
'AR6 climate diagnostics|Effective Radiative Forcing|CICERO-SCM|33.0th Percentile'	0	0	0
'AR6 climate diagnostics|Effective Radiative Forcing|CICERO-SCM|5.0th Percentile'	0	0	0
'AR6 climate diagnostics|Effective Radiative Forcing|CICERO-SCM|50.0th Percentile'	0	0	0
'AR6 climate diagnostics|Effective Radiative Forcing|CICERO-SCM|67.0th Percentile'	0	0	0
'AR6 climate diagnostics|Effective Radiative Forcing|CICERO-SCM|95.0th Percentile'	0	0	0
'AR6 climate diagnostics|Effective Radiative Forcing|CO2|CICERO-SCM|50.0th Percentile'	0	0	0
'AR6 climate diagnostics|Effective Radiative Forcing|CO2|FaIRv1.6.2|50.0th Percentile'	0	0	0
'AR6 climate diagnostics|Effective Radiative Forcing|FaIRv1.6.2|33.0th Percentile'	0	0	0
'AR6 climate diagnostics|Effective Radiative Forcing|FaIRv1.6.2|5.0th Percentile'	0	0	0
'AR6 climate diagnostics|Effective Radiative Forcing|FaIRv1.6.2|50.0th Percentile'	0	0	0
'AR6 climate diagnostics|Effective Radiative Forcing|FaIRv1.6.2|67.0th Percentile'	0	0	0
'AR6 climate diagnostics|Effective Radiative Forcing|FaIRv1.6.2|95.0th Percentile'	0	0	0
'AR6 climate diagnostics|Effective Radiative Forcing|MAGICCv7.5.3|33.0th Percentile'	0	0	0
'AR6 climate diagnostics|Effective Radiative Forcing|MAGICCv7.5.3|5.0th Percentile'	0	0	0
'AR6 climate diagnostics|Effective Radiative Forcing|MAGICCv7.5.3|50.0th Percentile'	0	0	0
'AR6 climate diagnostics|Effective Radiative Forcing|MAGICCv7.5.3|67.0th Percentile'	0	0	0
'AR6 climate diagnostics|Effective Radiative Forcing|MAGICCv7.5.3|95.0th Percentile'	0	0	0
'AR6 climate diagnostics|Emissions|Kyoto Gases (AR5-GWP100)'	0	0	0
'AR6 climate diagnostics|Emissions|Kyoto Gases (AR6-GWP100)'	0	0	0
'AR6 climate diagnostics|Exceedance Probability 1.5C|CICERO-SCM'	0	0	0
'AR6 climate diagnostics|Exceedance Probability 1.5C|FaIRv1.6.2'	0	0	0
'AR6 climate diagnostics|Exceedance Probability 1.5C|MAGICCv7.5.3'	0	0	0
'AR6 climate diagnostics|Exceedance Probability 2.0C|CICERO-SCM'	0	0	0
'AR6 climate diagnostics|Exceedance Probability 2.0C|FaIRv1.6.2'	0	0	0
'AR6 climate diagnostics|Exceedance Probability 2.0C|MAGICCv7.5.3'	0	0	0
'AR6 climate diagnostics|Exceedance Probability 2.5C|CICERO-SCM'	0	0	0
'AR6 climate diagnostics|Exceedance Probability 2.5C|FaIRv1.6.2'	0	0	0
'AR6 climate diagnostics|Exceedance Probability 2.5C|MAGICCv7.5.3'	0	0	0
'AR6 climate diagnostics|Exceedance Probability 3.0C|CICERO-SCM'	0	0	0
'AR6 climate diagnostics|Exceedance Probability 3.0C|FaIRv1.6.2'	0	0	0
'AR6 climate diagnostics|Exceedance Probability 3.0C|MAGICCv7.5.3'	0	0	0
'AR6 climate diagnostics|Infilled|Emissions|CH4'	0	0	0
'AR6 climate diagnostics|Infilled|Emissions|CO2'	0	0	0
'AR6 climate diagnostics|Infilled|Emissions|F-Gases'	0	0	0
'AR6 climate diagnostics|Infilled|Emissions|Kyoto Gases (AR5-GWP100)'	0	0	0
'AR6 climate diagnostics|Infilled|Emissions|Kyoto Gases (AR6-GWP100)'	0	0	0
'AR6 climate diagnostics|Infilled|Emissions|N2O'	0	0	0
'AR6 climate diagnostics|Native-with-Infilled|Emissions|Kyoto Gases (AR5-GWP100)'	0	0	0
'AR6 climate diagnostics|Native-with-Infilled|Emissions|Kyoto Gases (AR6-GWP100)'	0	0	0
'AR6 climate diagnostics|Surface Temperature (GSAT)|CICERO-SCM|10.0th Percentile'	0	0	0
'AR6 climate diagnostics|Surface Temperature (GSAT)|CICERO-SCM|16.7th Percentile'	0	0	0
'AR6 climate diagnostics|Surface Temperature (GSAT)|CICERO-SCM|33.0th Percentile'	0	0	0
'AR6 climate diagnostics|Surface Temperature (GSAT)|CICERO-SCM|5.0th Percentile'	0	0	0
'AR6 climate diagnostics|Surface Temperature (GSAT)|CICERO-SCM|50.0th Percentile'	0	0	0
'AR6 climate diagnostics|Surface Temperature (GSAT)|CICERO-SCM|67.0th Percentile'	0	0	0
'AR6 climate diagnostics|Surface Temperature (GSAT)|CICERO-SCM|83.3th Percentile'	0	0	0
'AR6 climate diagnostics|Surface Temperature (GSAT)|CICERO-SCM|90.0th Percentile'	0	0	0
'AR6 climate diagnostics|Surface Temperature (GSAT)|CICERO-SCM|95.0th Percentile'	0	0	0
'AR6 climate diagnostics|Surface Temperature (GSAT)|FaIRv1.6.2|10.0th Percentile'	0	0	0
'AR6 climate diagnostics|Surface Temperature (GSAT)|FaIRv1.6.2|16.7th Percentile'	0	0	0
'AR6 climate diagnostics|Surface Temperature (GSAT)|FaIRv1.6.2|33.0th Percentile'	0	0	0
'AR6 climate diagnostics|Surface Temperature (GSAT)|FaIRv1.6.2|5.0th Percentile'	0	0	0
'AR6 climate diagnostics|Surface Temperature (GSAT)|FaIRv1.6.2|50.0th Percentile'	0	0	0
'AR6 climate diagnostics|Surface Temperature (GSAT)|FaIRv1.6.2|67.0th Percentile'	0	0	0
'AR6 climate diagnostics|Surface Temperature (GSAT)|FaIRv1.6.2|83.3th Percentile'	0	0	0
'AR6 climate diagnostics|Surface Temperature (GSAT)|FaIRv1.6.2|90.0th Percentile'	0	0	0
'AR6 climate diagnostics|Surface Temperature (GSAT)|FaIRv1.6.2|95.0th Percentile'	0	0	0
'AR6 climate diagnostics|Surface Temperature (GSAT)|MAGICCv7.5.3|10.0th Percentile'	0	0	0
'AR6 climate diagnostics|Surface Temperature (GSAT)|MAGICCv7.5.3|16.7th Percentile'	0	0	0
'AR6 climate diagnostics|Surface Temperature (GSAT)|MAGICCv7.5.3|33.0th Percentile'	0	0	0
'AR6 climate diagnostics|Surface Temperature (GSAT)|MAGICCv7.5.3|5.0th Percentile'	0	0	0
'AR6 climate diagnostics|Surface Temperature (GSAT)|MAGICCv7.5.3|50.0th Percentile'	0	0	0
'AR6 climate diagnostics|Surface Temperature (GSAT)|MAGICCv7.5.3|67.0th Percentile'	0	0	0
'AR6 climate diagnostics|Surface Temperature (GSAT)|MAGICCv7.5.3|83.3th Percentile'	0	0	0
'AR6 climate diagnostics|Surface Temperature (GSAT)|MAGICCv7.5.3|90.0th Percentile'	0	0	0
'AR6 climate diagnostics|Surface Temperature (GSAT)|MAGICCv7.5.3|95.0th Percentile'	0	0	0
'Agricultural Demand'	0	1	1
'Agricultural Demand|Crops'	0	1	1
'Agricultural Demand|Crops|Energy'	0	1	1
'Agricultural Demand|Crops|Energy|1st generation'	0	0	0
'Agricultural Demand|Crops|Energy|2nd generation'	0	0	0
'Agricultural Demand|Crops|Feed'	0	0	0
'Agricultural Demand|Crops|Food'	0	0	0
'Agricultural Demand|Crops|Other'	0	0	0
'Agricultural Demand|Livestock'	0	1	1
'Agricultural Demand|Livestock|Food'	0	0	0
'Agricultural Demand|Livestock|Other'	0	0	0
'Agricultural Production'	0	1	1
'Agricultural Production|Energy'	0	1	1
'Agricultural Production|Energy|Crops'	0	0	0
'Agricultural Production|Energy|Residues'	0	0	0
'Agricultural Production|Non-Energy'	0	1	1
'Agricultural Production|Non-Energy|Crops'	0	0	0
'Agricultural Production|Non-Energy|Livestock'	0	0	0
'Capacity Additions|Electricity|Biomass'	0	0	0
'Capacity Additions|Electricity|Biomass|w/ CCS'	0	0	0
'Capacity Additions|Electricity|Biomass|w/o CCS'	0	0	0
'Capacity Additions|Electricity|Coal'	0	0	0
'Capacity Additions|Electricity|Coal|w/ CCS'	0	0	0
'Capacity Additions|Electricity|Coal|w/o CCS'	0	0	0
'Capacity Additions|Electricity|Fossil'	0	0	0
'Capacity Additions|Electricity|Gas'	0	0	0
'Capacity Additions|Electricity|Gas|w/ CCS'	0	0	0
'Capacity Additions|Electricity|Gas|w/o CCS'	0	0	0
'Capacity Additions|Electricity|Geothermal'	0	0	0
'Capacity Additions|Electricity|Hydro'	0	0	0
'Capacity Additions|Electricity|Non-Biomass Renewables'	0	0	0
'Capacity Additions|Electricity|Nuclear'	0	0	0
'Capacity Additions|Electricity|Oil'	0	0	0
'Capacity Additions|Electricity|Oil|w/ CCS'	0	0	0
'Capacity Additions|Electricity|Oil|w/o CCS'	0	0	0
'Capacity Additions|Electricity|Renewables (incl. Biomass)'	0	0	0
'Capacity Additions|Electricity|Solar'	0	0	0
'Capacity Additions|Electricity|Solar|CSP'	0	0	0
'Capacity Additions|Electricity|Solar|PV'	0	0	0
'Capacity Additions|Electricity|Storage Capacity'	0	0	0
'Capacity Additions|Electricity|Wind'	0	0	0
'Capacity Additions|Electricity|Wind|Offshore'	0	0	0
'Capacity Additions|Electricity|Wind|Onshore'	0	0	0
'Capacity|Electricity'	0	0	0
'Capacity|Electricity|Biomass'	0	0	0
'Capacity|Electricity|Biomass|w/ CCS'	0	0	0
'Capacity|Electricity|Biomass|w/o CCS'	0	0	0
'Capacity|Electricity|Coal'	0	0	0
'Capacity|Electricity|Coal|w/ CCS'	0	0	0
'Capacity|Electricity|Coal|w/o CCS'	0	0	0
'Capacity|Electricity|Fossil'	0	0	0
'Capacity|Electricity|Gas'	0	0	0
'Capacity|Electricity|Gas|w/ CCS'	0	0	0
'Capacity|Electricity|Gas|w/o CCS'	0	0	0
'Capacity|Electricity|Geothermal'	0	0	0
'Capacity|Electricity|Hydro'	0	0	0
'Capacity|Electricity|Non-Biomass Renewables'	0	0	0
'Capacity|Electricity|Nuclear'	0	0	0
'Capacity|Electricity|Ocean'	0	0	0
'Capacity|Electricity|Oil'	0	0	0
'Capacity|Electricity|Oil|w/ CCS'	0	0	0
'Capacity|Electricity|Oil|w/o CCS'	0	0	0
'Capacity|Electricity|Other'	0	0	0
'Capacity|Electricity|Peak Demand'	0	0	0
'Capacity|Electricity|Renewables (incl. Biomass)'	0	0	0
'Capacity|Electricity|Solar'	0	0	0
'Capacity|Electricity|Solar|CSP'	0	0	0
'Capacity|Electricity|Solar|PV'	0	0	0
'Capacity|Electricity|Storage'	0	0	0
'Capacity|Electricity|Storage Capacity'	0	0	0
'Capacity|Electricity|Wind'	0	0	0
'Capacity|Electricity|Wind|Offshore'	0	0	0
'Capacity|Electricity|Wind|Onshore'	0	0	0
'Capacity|Gases|Biomass'	0	0	0
'Capacity|Gases|Biomass|w/o CCS'	0	0	0
'Capacity|Gases|Coal'	0	0	0
'Capacity|Gases|Coal|w/o CCS'	0	0	0
'Capacity|Hydrogen|Biomass'	0	0	0
'Capacity|Hydrogen|Biomass|w/ CCS'	0	0	0
'Capacity|Hydrogen|Biomass|w/o CCS'	0	0	0
'Capacity|Hydrogen|Coal'	0	0	0
'Capacity|Hydrogen|Coal|w/ CCS'	0	0	0
'Capacity|Hydrogen|Coal|w/o CCS'	0	0	0
'Capacity|Hydrogen|Electricity'	0	0	0
'Capacity|Hydrogen|Gas'	0	0	0
'Capacity|Hydrogen|Gas|w/ CCS'	0	0	0
'Capacity|Hydrogen|Gas|w/o CCS'	0	0	0
'Capacity|Liquids|Biomass'	0	0	0
'Capacity|Liquids|Biomass|w/ CCS'	0	0	0
'Capacity|Liquids|Biomass|w/o CCS'	0	0	0
'Capacity|Liquids|Coal'	0	0	0
'Capacity|Liquids|Coal|w/ CCS'	0	0	0
'Capacity|Liquids|Coal|w/o CCS'	0	0	0
'Capacity|Liquids|Gas'	0	0	0
'Capacity|Liquids|Gas|w/ CCS'	0	0	0
'Capacity|Liquids|Gas|w/o CCS'	0	0	0
'Capacity|Liquids|Oil'	0	0	0
'Capacity|Transportation|Aviation|Freight'	0	0	0
'Capacity|Transportation|Aviation|Passenger'	0	0	0
'Capacity|Transportation|Maritime|Freight'	0	0	0
'Capacity|Transportation|Maritime|Passenger'	0	0	0
'Capacity|Transportation|Rail|Freight'	0	0	0
'Capacity|Transportation|Rail|Passenger'	0	0	0
'Capacity|Transportation|Road|Freight'	0	0	0
'Capacity|Transportation|Road|Passenger'	0	0	0
'Capital Cost|Electricity|Biomass|w/ CCS'	0	0	0
'Capital Cost|Electricity|Biomass|w/o CCS'	0	0	0
'Capital Cost|Electricity|Coal|w/ CCS'	0	0	0
'Capital Cost|Electricity|Coal|w/o CCS'	0	0	0
'Capital Cost|Electricity|Gas|w/ CCS'	0	0	0
'Capital Cost|Electricity|Gas|w/o CCS'	0	0	0
'Capital Cost|Electricity|Geothermal'	0	0	0
'Capital Cost|Electricity|Hydro'	0	0	0
'Capital Cost|Electricity|Nuclear'	0	0	0
'Capital Cost|Electricity|Solar|CSP'	0	0	0
'Capital Cost|Electricity|Solar|PV'	0	0	0
'Capital Cost|Electricity|Wind|Offshore'	0	0	0
'Capital Cost|Electricity|Wind|Onshore'	0	0	0
'Capital Cost|Gases|Biomass|w/ CCS'	0	0	0
'Capital Cost|Gases|Biomass|w/o CCS'	0	0	0
'Capital Cost|Gases|Coal|w/ CCS'	0	0	0
'Capital Cost|Gases|Coal|w/o CCS'	0	0	0
'Capital Cost|Hydrogen|Biomass|w/ CCS'	0	0	0
'Capital Cost|Hydrogen|Biomass|w/o CCS'	0	0	0
'Capital Cost|Hydrogen|Coal|w/ CCS'	0	0	0
'Capital Cost|Hydrogen|Coal|w/o CCS'	0	0	0
'Capital Cost|Hydrogen|Electricity'	0	0	0
'Capital Cost|Hydrogen|Gas|w/ CCS'	0	0	0
'Capital Cost|Hydrogen|Gas|w/o CCS'	0	0	0
'Capital Cost|Liquids|Biomass|w/ CCS'	0	0	0
'Capital Cost|Liquids|Biomass|w/o CCS'	0	0	0
'Capital Cost|Liquids|Coal|w/ CCS'	0	0	0
'Capital Cost|Liquids|Coal|w/o CCS'	0	0	0
'Capital Cost|Liquids|Gas|w/ CCS'	0	0	0
'Capital Cost|Liquids|Gas|w/o CCS'	0	0	0
'Capital Cost|Liquids|Oil'	0	0	0
'Capital Formation'	0	0	0
'Capital Stock'	0	0	0
'Carbon Intensity|Production|Cement'	0	0	0
'Carbon Intensity|Production|Cement|Fossil|Energy|Demand|Industry'	0	0	0
'Carbon Intensity|Production|Cement|Industrial Processes'	0	0	0
'Carbon Intensity|Production|Chemicals'	0	0	0
'Carbon Intensity|Production|Chemicals|Fossil|Energy|Demand|Industry'	0	0	0
'Carbon Intensity|Production|Chemicals|Industrial Processes'	0	0	0
'Carbon Intensity|Production|Steel'	0	0	0
'Carbon Intensity|Production|Steel|Fossil|Energy|Demand|Industry'	0	0	0
'Carbon Intensity|Production|Steel|Industrial Processes'	0	0	0
'Carbon Sequestration|CCS'	1	0	1
'Carbon Sequestration|CCS|Biomass'	1	0	1
'Carbon Sequestration|CCS|Biomass|Energy'	0	1	1
'Carbon Sequestration|CCS|Biomass|Energy|Demand|Industry'	0	0	0
'Carbon Sequestration|CCS|Biomass|Energy|Supply'	0	0	0
'Carbon Sequestration|CCS|Biomass|Energy|Supply|Electricity'	0	0	0
'Carbon Sequestration|CCS|Biomass|Energy|Supply|Gases'	0	0	0
'Carbon Sequestration|CCS|Biomass|Energy|Supply|Hydrogen'	0	0	0
'Carbon Sequestration|CCS|Biomass|Energy|Supply|Liquids'	0	0	0
'Carbon Sequestration|CCS|Biomass|Energy|Supply|Other'	0	0	0
'Carbon Sequestration|CCS|Biomass|Industrial Processes'	0	1	1
'Carbon Sequestration|CCS|Fossil'	1	0	1
'Carbon Sequestration|CCS|Fossil|Energy'	0	1	1
'Carbon Sequestration|CCS|Fossil|Energy|Demand|Industry'	0	0	0
'Carbon Sequestration|CCS|Fossil|Energy|Supply'	0	0	0
'Carbon Sequestration|CCS|Fossil|Energy|Supply|Electricity'	0	0	0
'Carbon Sequestration|CCS|Fossil|Energy|Supply|Gases'	0	0	0
'Carbon Sequestration|CCS|Fossil|Energy|Supply|Hydrogen'	0	0	0
'Carbon Sequestration|CCS|Fossil|Energy|Supply|Liquids'	0	0	0
'Carbon Sequestration|CCS|Fossil|Energy|Supply|Other'	0	0	0
'Carbon Sequestration|CCS|Fossil|Industrial Processes'	0	1	1
'Carbon Sequestration|CCS|Industrial Processes'	1	0	1
'Carbon Sequestration|Direct Air Capture'	1	0	1
'Carbon Sequestration|Enhanced Weathering'	1	0	1
'Carbon Sequestration|Feedstocks'	1	0	1
'Carbon Sequestration|Land Use'	1	0	1
'Carbon Sequestration|Land Use|Afforestation'	1	0	1
'Carbon Sequestration|Land Use|Biochar'	1	0	1
'Carbon Sequestration|Land Use|Other'	1	0	1
'Carbon Sequestration|Land Use|Soil Carbon Management'	1	0	1
'Carbon Sequestration|Other'	1	0	1
'Carbon Utilization|CCS|Industry'	0	0	0
'Concentration|CH4'	0	1	1
'Concentration|CO2'	0	1	1
'Concentration|N2O'	0	1	1
'Consumption'	0	1	1
'Cumulative Capacity|Electricity|Biomass'	0	0	0
'Cumulative Capacity|Electricity|Biomass|w/ CCS'	0	0	0
'Cumulative Capacity|Electricity|Biomass|w/o CCS'	0	0	0
'Cumulative Capacity|Electricity|Coal'	0	0	0
'Cumulative Capacity|Electricity|Coal|w/ CCS'	0	0	0
'Cumulative Capacity|Electricity|Coal|w/o CCS'	0	0	0
'Cumulative Capacity|Electricity|Fossil'	0	0	0
'Cumulative Capacity|Electricity|Gas'	0	0	0
'Cumulative Capacity|Electricity|Gas|w/ CCS'	0	0	0
'Cumulative Capacity|Electricity|Gas|w/o CCS'	0	0	0
'Cumulative Capacity|Electricity|Geothermal'	0	0	0
'Cumulative Capacity|Electricity|Hydro'	0	0	0
'Cumulative Capacity|Electricity|Non-Biomass Renewables'	0	0	0
'Cumulative Capacity|Electricity|Nuclear'	0	0	0
'Cumulative Capacity|Electricity|Ocean'	0	0	0
'Cumulative Capacity|Electricity|Oil'	0	0	0
'Cumulative Capacity|Electricity|Oil|w/ CCS'	0	0	0
'Cumulative Capacity|Electricity|Oil|w/o CCS'	0	0	0
'Cumulative Capacity|Electricity|Other'	0	0	0
'Cumulative Capacity|Electricity|Renewables (incl. Biomass)'	0	0	0
'Cumulative Capacity|Electricity|Solar'	0	0	0
'Cumulative Capacity|Electricity|Solar|CSP'	0	0	0
'Cumulative Capacity|Electricity|Solar|PV'	0	0	0
'Cumulative Capacity|Electricity|Wind'	0	0	0
'Cumulative Capacity|Electricity|Wind|Offshore'	0	0	0
'Cumulative Capacity|Electricity|Wind|Onshore'	0	0	0
'Cumulative Capacity|Gases|Biomass'	0	0	0
'Cumulative Capacity|Gases|Biomass|w/o CCS'	0	0	0
'Cumulative Capacity|Gases|Coal'	0	0	0
'Cumulative Capacity|Gases|Coal|w/o CCS'	0	0	0
'Cumulative Capacity|Hydrogen|Biomass'	0	0	0
'Cumulative Capacity|Hydrogen|Biomass|w/ CCS'	0	0	0
'Cumulative Capacity|Hydrogen|Biomass|w/o CCS'	0	0	0
'Cumulative Capacity|Hydrogen|Coal'	0	0	0
'Cumulative Capacity|Hydrogen|Coal|w/ CCS'	0	0	0
'Cumulative Capacity|Hydrogen|Coal|w/o CCS'	0	0	0
'Cumulative Capacity|Hydrogen|Electricity'	0	0	0
'Cumulative Capacity|Hydrogen|Gas'	0	0	0
'Cumulative Capacity|Hydrogen|Gas|w/ CCS'	0	0	0
'Cumulative Capacity|Hydrogen|Gas|w/o CCS'	0	0	0
'Cumulative Capacity|Liquids|Biomass'	0	0	0
'Cumulative Capacity|Liquids|Biomass|w/ CCS'	0	0	0
'Cumulative Capacity|Liquids|Biomass|w/o CCS'	0	0	0
'Cumulative Capacity|Liquids|Coal'	0	0	0
'Cumulative Capacity|Liquids|Coal|w/ CCS'	0	0	0
'Cumulative Capacity|Liquids|Coal|w/o CCS'	0	0	0
'Cumulative Capacity|Liquids|Gas'	0	0	0
'Cumulative Capacity|Liquids|Gas|w/ CCS'	0	0	0
'Cumulative Capacity|Liquids|Gas|w/o CCS'	0	0	0
'Cumulative Capacity|Liquids|Oil'	0	0	0
'Discount rate|Economy'	0	1	1
'Discount rate|Electricity'	0	1	1
'Discount rate|Energy Supply'	0	1	1
'Discount rate|Industry'	0	0	0
'Discount rate|Mobility'	0	0	0
'Discount rate|Residential and Commercial'	0	0	0
'Discount rate|Social'	0	1	1
'Discount rate|Transport Infrastructure'	0	0	0
'Ecotoxicity|Freshwater|Electricity'	0	0	0
'Ecotoxicity|Marine|Electricity'	0	0	0
'Efficiency|Electricity|Biomass|w/ CCS'	0	0	0
'Efficiency|Electricity|Biomass|w/o CCS'	0	0	0
'Efficiency|Electricity|Coal|w/ CCS'	0	0	0
'Efficiency|Electricity|Coal|w/o CCS'	0	0	0
'Efficiency|Electricity|Gas|w/ CCS'	0	0	0
'Efficiency|Electricity|Gas|w/o CCS'	0	0	0
'Efficiency|Gases|Biomass|w/o CCS'	0	0	0
'Efficiency|Gases|Coal|w/o CCS'	0	0	0
'Efficiency|Hydrogen|Biomass|w/ CCS'	0	0	0
'Efficiency|Hydrogen|Biomass|w/o CCS'	0	0	0
'Efficiency|Hydrogen|Coal|w/ CCS'	0	0	0
'Efficiency|Hydrogen|Coal|w/o CCS'	0	0	0
'Efficiency|Hydrogen|Electricity'	0	0	0
'Efficiency|Hydrogen|Gas|w/ CCS'	0	0	0
'Efficiency|Hydrogen|Gas|w/o CCS'	0	0	0
'Efficiency|Liquids|Biomass|w/ CCS'	0	0	0
'Efficiency|Liquids|Biomass|w/o CCS'	0	0	0
'Efficiency|Liquids|Coal|w/ CCS'	0	0	0
'Efficiency|Liquids|Coal|w/o CCS'	0	0	0
'Efficiency|Liquids|Gas|w/ CCS'	0	0	0
'Efficiency|Liquids|Gas|w/o CCS'	0	0	0
'Efficiency|Liquids|Oil'	0	0	0
'Emissions|BC'	1	0	1
'Emissions|BC|AFOLU'	0	1	1
'Emissions|BC|AFOLU|Agriculture'	0	0	0
'Emissions|BC|AFOLU|Land'	0	0	0
'Emissions|BC|Energy'	0	1	1
'Emissions|BC|Energy|Demand|Industry'	0	0	0
'Emissions|BC|Energy|Demand|Residential and Commercial'	0	0	0
'Emissions|BC|Energy|Demand|Residential and Commercial|Commercial'	0	0	0
'Emissions|BC|Energy|Demand|Residential and Commercial|Residential'	0	0	0
'Emissions|BC|Energy|Demand|Transportation'	0	0	0
'Emissions|BC|Energy|Supply'	0	0	0
'Emissions|BC|Industrial Processes'	0	1	1
'Emissions|BC|Other'	0	1	1
'Emissions|BC|Waste'	0	1	1
'Emissions|C2F6'	0	0	0
'Emissions|CF4'	0	0	0
'Emissions|CH4'	1	0	1
'Emissions|CH4|AFOLU'	1	0	1
'Emissions|CH4|AFOLU|Agriculture'	0	0	0
'Emissions|CH4|AFOLU|Agriculture|Livestock'	0	0	0
'Emissions|CH4|AFOLU|Agriculture|Livestock|Enteric Fermentation'	0	0	0
'Emissions|CH4|AFOLU|Agriculture|Livestock|Manure Management'	0	0	0
'Emissions|CH4|AFOLU|Agriculture|Rice'	0	0	0
'Emissions|CH4|AFOLU|Land'	0	0	0
'Emissions|CH4|Energy'	0	1	1
'Emissions|CH4|Energy|Demand|Industry'	0	0	0
'Emissions|CH4|Energy|Demand|Residential and Commercial'	0	0	0
'Emissions|CH4|Energy|Demand|Residential and Commercial|Commercial'	0	0	0
'Emissions|CH4|Energy|Demand|Residential and Commercial|Residential'	0	0	0
'Emissions|CH4|Energy|Demand|Transportation'	0	0	0
'Emissions|CH4|Energy|Supply'	0	0	0
'Emissions|CH4|Industrial Processes'	0	1	1
'Emissions|CH4|Industrial Processes|Chemicals'	0	0	0
'Emissions|CH4|Industrial Processes|Steel'	0	0	0
'Emissions|CH4|Other'	0	1	1
'Emissions|CH4|Waste'	0	1	1
'Emissions|CO'	1	0	1
'Emissions|CO2'	0	1	1
'Emissions|CO2|AFOLU'	0	1	1
'Emissions|CO2|AFOLU|Agriculture'	0	1	1
'Emissions|CO2|AFOLU|Land'	0	1	1
'Emissions|CO2|Energy'	0	1	1
'Emissions|CO2|Energy and Industrial Processes'	0	1	1
'Emissions|CO2|Energy|Demand'	0	1	1
'Emissions|CO2|Energy|Demand|AFOFI'	0	1	1
'Emissions|CO2|Energy|Demand|Industry'	0	1	1
'Emissions|CO2|Energy|Demand|Industry|Cement'	0	0	0
'Emissions|CO2|Energy|Demand|Industry|Chemicals'	0	0	0
'Emissions|CO2|Energy|Demand|Industry|Chemicals|Ammonia'	0	0	0
'Emissions|CO2|Energy|Demand|Industry|Chemicals|High value chemicals'	0	0	0
'Emissions|CO2|Energy|Demand|Industry|Chemicals|Methanol'	0	0	0
'Emissions|CO2|Energy|Demand|Industry|Chemicals|Other'	0	0	0
'Emissions|CO2|Energy|Demand|Industry|Non-ferrous metals'	0	0	0
'Emissions|CO2|Energy|Demand|Industry|Other'	0	0	0
'Emissions|CO2|Energy|Demand|Industry|Pulp and Paper'	0	0	0
'Emissions|CO2|Energy|Demand|Industry|Steel'	0	0	0
'Emissions|CO2|Energy|Demand|Other Sector'	0	0	0
'Emissions|CO2|Energy|Demand|Residential and Commercial'	0	1	1
'Emissions|CO2|Energy|Demand|Residential and Commercial|Commercial'	0	0	0
'Emissions|CO2|Energy|Demand|Residential and Commercial|Commercial|Heating'	0	0	0
'Emissions|CO2|Energy|Demand|Residential and Commercial|Commercial|Heating|Cooking'	0	0	0
'Emissions|CO2|Energy|Demand|Residential and Commercial|Commercial|Heating|Space'	0	0	0
'Emissions|CO2|Energy|Demand|Residential and Commercial|Commercial|Heating|Water'	0	0	0
'Emissions|CO2|Energy|Demand|Residential and Commercial|Residential'	0	0	0
'Emissions|CO2|Energy|Demand|Residential and Commercial|Residential|Heating'	0	0	0
'Emissions|CO2|Energy|Demand|Residential and Commercial|Residential|Heating|Cooking'	0	0	0
'Emissions|CO2|Energy|Demand|Residential and Commercial|Residential|Heating|Space'	0	0	0
'Emissions|CO2|Energy|Demand|Residential and Commercial|Residential|Heating|Water'	0	0	0
'Emissions|CO2|Energy|Demand|Transportation'	0	1	1
'Emissions|CO2|Energy|Demand|Transportation|Aviation'	0	0	0
'Emissions|CO2|Energy|Demand|Transportation|Aviation|Freight'	0	0	0
'Emissions|CO2|Energy|Demand|Transportation|Aviation|Passenger'	0	0	0
'Emissions|CO2|Energy|Demand|Transportation|Freight'	0	0	0
'Emissions|CO2|Energy|Demand|Transportation|Maritime'	0	0	0
'Emissions|CO2|Energy|Demand|Transportation|Maritime|Freight'	0	0	0
'Emissions|CO2|Energy|Demand|Transportation|Maritime|Passenger'	0	0	0
'Emissions|CO2|Energy|Demand|Transportation|Passenger'	0	0	0
'Emissions|CO2|Energy|Demand|Transportation|Rail'	0	0	0
'Emissions|CO2|Energy|Demand|Transportation|Rail|Freight'	0	0	0
'Emissions|CO2|Energy|Demand|Transportation|Rail|Passenger'	0	0	0
'Emissions|CO2|Energy|Demand|Transportation|Road'	0	0	0
'Emissions|CO2|Energy|Demand|Transportation|Road|Freight'	0	0	0
'Emissions|CO2|Energy|Demand|Transportation|Road|Passenger'	0	0	0
'Emissions|CO2|Energy|Demand|Transportation|Road|Passenger|2W&3W'	0	0	0
'Emissions|CO2|Energy|Demand|Transportation|Road|Passenger|Bus'	0	0	0
'Emissions|CO2|Energy|Demand|Transportation|Road|Passenger|LDV'	0	0	0
'Emissions|CO2|Energy|Supply'	0	1	1
'Emissions|CO2|Energy|Supply|Electricity'	0	1	1
'Emissions|CO2|Energy|Supply|Gases'	0	0	0
'Emissions|CO2|Energy|Supply|Heat'	0	0	0
'Emissions|CO2|Energy|Supply|Liquids'	0	0	0
'Emissions|CO2|Energy|Supply|Other Sector'	0	0	0
'Emissions|CO2|Energy|Supply|Solids'	0	0	0
'Emissions|CO2|Industrial Processes'	0	1	1
'Emissions|CO2|Industrial Processes|Cement'	0	1	1
'Emissions|CO2|Industrial Processes|Chemicals'	0	1	1
'Emissions|CO2|Industrial Processes|Chemicals|Ammonia'	0	0	0
'Emissions|CO2|Industrial Processes|Chemicals|High value chemicals'	0	0	0
'Emissions|CO2|Industrial Processes|Chemicals|Methanol'	0	0	0
'Emissions|CO2|Industrial Processes|Chemicals|Other'	0	0	0
'Emissions|CO2|Industrial Processes|Non-ferrous metals'	0	1	1
'Emissions|CO2|Industrial Processes|Other'	0	1	1
'Emissions|CO2|Industrial Processes|Pulp and Paper'	0	1	1
'Emissions|CO2|Industrial Processes|Steel'	0	1	1
'Emissions|CO2|Other'	0	1	1
'Emissions|CO2|Waste'	0	1	1
'Emissions|CO|AFOLU'	0	1	1
'Emissions|CO|AFOLU|Agriculture'	0	0	0
'Emissions|CO|AFOLU|Land'	0	0	0
'Emissions|CO|Energy'	0	1	1
'Emissions|CO|Energy|Demand|Industry'	0	0	0
'Emissions|CO|Energy|Demand|Residential and Commercial'	0	0	0
'Emissions|CO|Energy|Demand|Residential and Commercial|Commercial'	0	0	0
'Emissions|CO|Energy|Demand|Residential and Commercial|Residential'	0	0	0
'Emissions|CO|Energy|Demand|Transportation'	0	0	0
'Emissions|CO|Energy|Supply'	0	0	0
'Emissions|CO|Industrial Processes'	0	1	1
'Emissions|CO|Other'	0	1	1
'Emissions|CO|Waste'	0	1	1
'Emissions|F-Gases'	1	0	1
'Emissions|HFC'	1	0	1
'Emissions|HFC|HFC125'	0	1	1
'Emissions|HFC|HFC134a'	0	1	1
'Emissions|HFC|HFC143a'	0	1	1
'Emissions|HFC|HFC227ea'	0	1	1
'Emissions|HFC|HFC23'	0	1	1
'Emissions|HFC|HFC245fa'	0	1	1
'Emissions|HFC|HFC32'	0	1	1
'Emissions|HFC|HFC43-10'	0	1	1
'Emissions|HFC|Industrial Processes'	0	1	1
'Emissions|Kyoto Gases'	1	0	1
'Emissions|N2O'	1	0	1
'Emissions|N2O|AFOLU'	0	1	1
'Emissions|N2O|AFOLU|Agriculture'	0	0	0
'Emissions|N2O|AFOLU|Agriculture|Livestock|Manure Management'	0	0	0
'Emissions|N2O|AFOLU|Agriculture|Managed Soils'	0	0	0
'Emissions|N2O|AFOLU|Land'	0	0	0
'Emissions|N2O|Energy'	0	1	1
'Emissions|N2O|Energy|Demand|Residential and Commercial|Commercial'	0	0	0
'Emissions|N2O|Energy|Demand|Residential and Commercial|Residential'	0	0	0
'Emissions|N2O|Energy|Demand|Transportation'	0	0	0
'Emissions|N2O|Industrial Processes'	0	1	1
'Emissions|N2O|Industrial Processes|Chemicals'	0	0	0
'Emissions|N2O|Other'	0	1	1
'Emissions|N2O|Waste'	0	1	1
'Emissions|NH3'	1	0	1
'Emissions|NH3|AFOLU'	0	1	1
'Emissions|NH3|AFOLU|Agriculture'	0	0	0
'Emissions|NH3|AFOLU|Land'	0	0	0
'Emissions|NH3|Energy'	0	1	1
'Emissions|NH3|Energy|Demand|Industry'	0	0	0
'Emissions|NH3|Energy|Demand|Residential and Commercial'	0	0	0
'Emissions|NH3|Energy|Demand|Transportation'	0	0	0
'Emissions|NH3|Energy|Supply'	0	0	0
'Emissions|NH3|Industrial Processes'	0	1	1
'Emissions|NH3|Other'	0	1	1
'Emissions|NH3|Waste'	0	1	1
'Emissions|NOx'	1	0	1
'Emissions|NOx|AFOLU'	0	1	1
'Emissions|NOx|AFOLU|Agriculture'	0	0	0
'Emissions|NOx|AFOLU|Land'	0	0	0
'Emissions|NOx|Energy'	0	1	1
'Emissions|NOx|Energy|Demand|Industry'	0	0	0
'Emissions|NOx|Energy|Demand|Residential and Commercial'	0	0	0
'Emissions|NOx|Energy|Demand|Residential and Commercial|Commercial'	0	0	0
'Emissions|NOx|Energy|Demand|Residential and Commercial|Residential'	0	0	0
'Emissions|NOx|Energy|Demand|Transportation'	0	0	0
'Emissions|NOx|Energy|Supply'	0	0	0
'Emissions|NOx|Industrial Processes'	0	1	1
'Emissions|NOx|Other'	0	1	1
'Emissions|NOx|Waste'	0	1	1
'Emissions|OC'	1	0	1
'Emissions|OC|AFOLU'	0	1	1
'Emissions|OC|AFOLU|Agriculture'	0	0	0
'Emissions|OC|AFOLU|Land'	0	0	0
'Emissions|OC|Energy'	0	1	1
'Emissions|OC|Energy|Demand|Industry'	0	0	0
'Emissions|OC|Energy|Demand|Residential and Commercial'	0	0	0
'Emissions|OC|Energy|Demand|Residential and Commercial|Commercial'	0	0	0
'Emissions|OC|Energy|Demand|Residential and Commercial|Residential'	0	0	0
'Emissions|OC|Energy|Demand|Transportation'	0	0	0
'Emissions|OC|Energy|Supply'	0	0	0
'Emissions|OC|Industrial Processes'	0	1	1
'Emissions|OC|Other'	0	1	1
'Emissions|OC|Waste'	0	1	1
'Emissions|PFC'	1	0	1
'Emissions|PFC|C2F6'	0	1	1
'Emissions|PFC|C6F14'	0	1	1
'Emissions|PFC|CF4'	0	1	1
'Emissions|PM2.5'	1	0	1
'Emissions|SF6'	1	0	1
'Emissions|Sulfur'	1	0	1
'Emissions|Sulfur|AFOLU'	0	1	1
'Emissions|Sulfur|AFOLU|Agriculture'	0	0	0
'Emissions|Sulfur|AFOLU|Land'	0	0	0
'Emissions|Sulfur|Energy'	0	1	1
'Emissions|Sulfur|Energy|Demand|Industry'	0	0	0
'Emissions|Sulfur|Energy|Demand|Residential and Commercial'	0	0	0
'Emissions|Sulfur|Energy|Demand|Residential and Commercial|Commercial'	0	0	0
'Emissions|Sulfur|Energy|Demand|Residential and Commercial|Residential'	0	0	0
'Emissions|Sulfur|Energy|Demand|Transportation'	0	0	0
'Emissions|Sulfur|Energy|Supply'	0	0	0
'Emissions|Sulfur|Industrial Processes'	0	1	1
'Emissions|Sulfur|Other'	0	1	1
'Emissions|Sulfur|Waste'	0	1	1
'Emissions|VOC'	1	0	1
'Emissions|VOC|AFOLU'	0	1	1
'Emissions|VOC|AFOLU|Agriculture'	0	0	0
'Emissions|VOC|AFOLU|Land'	0	0	0
'Emissions|VOC|Energy'	0	1	1
'Emissions|VOC|Energy|Demand|Industry'	0	0	0
'Emissions|VOC|Energy|Demand|Residential and Commercial'	0	0	0
'Emissions|VOC|Energy|Demand|Residential and Commercial|Commercial'	0	0	0
'Emissions|VOC|Energy|Demand|Residential and Commercial|Residential'	0	0	0
'Emissions|VOC|Energy|Demand|Transportation'	0	0	0
'Emissions|VOC|Energy|Supply'	0	0	0
'Emissions|VOC|Industrial Processes'	0	1	1
'Emissions|VOC|Other'	0	1	1
'Emissions|VOC|Waste'	0	1	1
'Employment'	0	0	0
'Employment|Agriculture'	0	0	0
'Employment|Industry'	0	0	0
'Employment|Industry|Energy'	0	0	0
'Employment|Industry|Energy Intensive'	0	0	0
'Employment|Industry|Manufacturing'	0	0	0
'Employment|Service'	0	0	0
'Energy Service|Residential and Commercial|Commercial|Floor Space'	0	0	0
'Energy Service|Residential and Commercial|Floor Space'	0	1	1
'Energy Service|Residential and Commercial|Residential|Floor Space'	0	0	0
'Energy Service|Transportation|Aviation'	0	0	0
'Energy Service|Transportation|Freight'	0	1	1
'Energy Service|Transportation|Freight|Aviation'	0	0	0
'Energy Service|Transportation|Freight|International Shipping'	0	0	0
'Energy Service|Transportation|Freight|Navigation'	0	0	0
'Energy Service|Transportation|Freight|Railways'	0	0	0
'Energy Service|Transportation|Freight|Road'	0	0	0
'Energy Service|Transportation|Navigation'	0	0	0
'Energy Service|Transportation|Passenger'	0	1	1
'Energy Service|Transportation|Passenger|Aviation'	0	0	0
'Energy Service|Transportation|Passenger|Bicycling and Walking'	0	0	0
'Energy Service|Transportation|Passenger|Railways'	0	0	0
'Energy Service|Transportation|Passenger|Road'	0	0	0
'Energy Service|Transportation|Passenger|Road|2W and 3W'	0	0	0
'Energy Service|Transportation|Passenger|Road|Bus'	0	0	0
'Energy Service|Transportation|Passenger|Road|LDV'	0	0	0
'Energy Service|Transportation|Rail'	0	0	0
'Energy Service|Transportation|Road'	0	0	0
'Eutrophication|Marine|Electricity'	0	0	0
'Expenditure|Energy|Fossil'	0	0	0
'Expenditure|Medical System|Incremental'	0	0	0
'Expenditure|RnD'	0	0	0
'Expenditure|government'	0	0	0
'Expenditure|household'	0	0	0
'Expenditure|household|Energy'	0	0	0
'Expenditure|household|Food'	0	0	0
'Expenditure|household|Industry'	0	0	0
'Expenditure|household|Services'	0	0	0
'Expenditure|household|Services|health'	0	0	0
'Export'	0	0	0
'Export|Agriculture'	0	0	0
'Export|Energy'	0	0	0
'Export|Industry'	0	0	0
'Export|Industry|Energy'	0	0	0
'Export|Industry|Energy Intensive'	0	0	0
'Export|Industry|Manufacturing'	0	0	0
'Export|Other'	0	0	0
'Fertilizer Use|Nitrogen'	0	0	0
'Fertilizer Use|Phosphorus'	0	0	0
'Final Energy'	1	0	1
'Final Energy (excl. feedstocks)|Industry'	0	0	0
'Final Energy (excl. feedstocks)|Industry|Electricity'	0	0	0
'Final Energy (excl. feedstocks)|Industry|Gases'	0	0	0
'Final Energy (excl. feedstocks)|Industry|Gases|Bioenergy'	0	0	0
'Final Energy (excl. feedstocks)|Industry|Gases|Fossil'	0	0	0
'Final Energy (excl. feedstocks)|Industry|Gases|Hydrogen synfuel'	0	0	0
'Final Energy (excl. feedstocks)|Industry|Heat'	0	0	0
'Final Energy (excl. feedstocks)|Industry|Hydrogen'	0	0	0
'Final Energy (excl. feedstocks)|Industry|Liquids'	0	0	0
'Final Energy (excl. feedstocks)|Industry|Liquids|Bioenergy'	0	0	0
'Final Energy (excl. feedstocks)|Industry|Liquids|Fossil'	0	0	0
'Final Energy (excl. feedstocks)|Industry|Liquids|Hydrogen synfuel'	0	0	0
'Final Energy (excl. feedstocks)|Industry|Other'	0	0	0
'Final Energy (excl. feedstocks)|Industry|Solids'	0	0	0
'Final Energy (excl. feedstocks)|Industry|Solids|Bioenergy'	0	0	0
'Final Energy (excl. feedstocks)|Industry|Solids|Fossil'	0	0	0
'Final Energy|Electricity'	1	0	1
'Final Energy|Gases'	1	0	1
'Final Energy|Geothermal'	1	0	1
'Final Energy|Heat'	1	0	1
'Final Energy|Hydrogen'	1	0	1
'Final Energy|Industry'	1	0	1
'Final Energy|Industry|Cement|Electricity'	0	0	0
'Final Energy|Industry|Cement|Gases'	0	0	0
'Final Energy|Industry|Cement|Gases|Bioenergy'	0	0	0
'Final Energy|Industry|Cement|Gases|Fossil'	0	0	0
'Final Energy|Industry|Cement|Gases|Hydrogen synfuel'	0	0	0
'Final Energy|Industry|Cement|Heat'	0	0	0
'Final Energy|Industry|Cement|Hydrogen'	0	0	0
'Final Energy|Industry|Cement|Liquids'	0	0	0
'Final Energy|Industry|Cement|Liquids|Bioenergy'	0	0	0
'Final Energy|Industry|Cement|Liquids|Fossil'	0	0	0
'Final Energy|Industry|Cement|Liquids|Hydrogen synfuel'	0	0	0
'Final Energy|Industry|Cement|Other'	0	0	0
'Final Energy|Industry|Cement|Solids'	0	0	0
'Final Energy|Industry|Cement|Solids|Bioenergy'	0	0	0
'Final Energy|Industry|Cement|Solids|Fossil'	0	0	0
'Final Energy|Industry|Chemicals|Ammonia|Electricity'	0	0	0
'Final Energy|Industry|Chemicals|Ammonia|Gases'	0	0	0
'Final Energy|Industry|Chemicals|Ammonia|Gases|Bioenergy'	0	0	0
'Final Energy|Industry|Chemicals|Ammonia|Gases|Fossil'	0	0	0
'Final Energy|Industry|Chemicals|Ammonia|Heat'	0	0	0
'Final Energy|Industry|Chemicals|Ammonia|Hydrogen'	0	0	0
'Final Energy|Industry|Chemicals|Ammonia|Liquids'	0	0	0
'Final Energy|Industry|Chemicals|Ammonia|Liquids|Bioenergy'	0	0	0
'Final Energy|Industry|Chemicals|Ammonia|Liquids|Fossil'	0	0	0
'Final Energy|Industry|Chemicals|Ammonia|Other'	0	0	0
'Final Energy|Industry|Chemicals|Ammonia|Solids'	0	0	0
'Final Energy|Industry|Chemicals|Ammonia|Solids|Bioenergy'	0	0	0
'Final Energy|Industry|Chemicals|Ammonia|Solids|Fossil'	0	0	0
'Final Energy|Industry|Chemicals|Electricity'	0	0	0
'Final Energy|Industry|Chemicals|Gases'	0	0	0
'Final Energy|Industry|Chemicals|Gases|Bioenergy'	0	0	0
'Final Energy|Industry|Chemicals|Gases|Fossil'	0	0	0
'Final Energy|Industry|Chemicals|Gases|Hydrogen synfuel'	0	0	0
'Final Energy|Industry|Chemicals|Heat'	0	0	0
'Final Energy|Industry|Chemicals|High value chemicals|Electricity'	0	0	0
'Final Energy|Industry|Chemicals|High value chemicals|Gases'	0	0	0
'Final Energy|Industry|Chemicals|High value chemicals|Gases|Fossil'	0	0	0
'Final Energy|Industry|Chemicals|High value chemicals|Liquids'	0	0	0
'Final Energy|Industry|Chemicals|High value chemicals|Liquids|Bioenergy'	0	0	0
'Final Energy|Industry|Chemicals|High value chemicals|Liquids|Fossil'	0	0	0
'Final Energy|Industry|Chemicals|High value chemicals|Solids'	0	0	0
'Final Energy|Industry|Chemicals|High value chemicals|Solids|Bioenergy'	0	0	0
'Final Energy|Industry|Chemicals|High value chemicals|Solids|Fossil'	0	0	0
'Final Energy|Industry|Chemicals|Hydrogen'	0	0	0
'Final Energy|Industry|Chemicals|Liquids'	0	0	0
'Final Energy|Industry|Chemicals|Liquids|Bioenergy'	0	0	0
'Final Energy|Industry|Chemicals|Liquids|Fossil'	0	0	0
'Final Energy|Industry|Chemicals|Liquids|Hydrogen synfuel'	0	0	0
'Final Energy|Industry|Chemicals|Other'	0	0	0
'Final Energy|Industry|Chemicals|Solids'	0	0	0
'Final Energy|Industry|Chemicals|Solids|Bioenergy'	0	0	0
'Final Energy|Industry|Chemicals|Solids|Fossil'	0	0	0
'Final Energy|Industry|Electricity'	0	1	1
'Final Energy|Industry|Gases'	0	1	1
'Final Energy|Industry|Gases|'	0	0	0
'Final Energy|Industry|Gases|Bioenergy'	0	0	0
'Final Energy|Industry|Gases|Fossil'	0	0	0
'Final Energy|Industry|Gases|Hydrogen synfuel'	0	0	0
'Final Energy|Industry|Heat'	0	1	1
'Final Energy|Industry|Hydrogen'	0	1	1
'Final Energy|Industry|Liquids'	0	1	1
'Final Energy|Industry|Liquids|'	0	0	0
'Final Energy|Industry|Liquids|Bioenergy'	0	0	0
'Final Energy|Industry|Liquids|Fossil'	0	0	0
'Final Energy|Industry|Liquids|Hydrogen synfuel'	0	0	0
'Final Energy|Industry|Liquids|Oil'	0	0	0
'Final Energy|Industry|Other'	0	1	1
'Final Energy|Industry|Other|Electricity'	0	0	0
'Final Energy|Industry|Other|Gases'	0	0	0
'Final Energy|Industry|Other|Gases|Fossil'	0	0	0
'Final Energy|Industry|Other|Heat'	0	0	0
'Final Energy|Industry|Other|Hydrogen'	0	0	0
'Final Energy|Industry|Other|Liquids'	0	0	0
'Final Energy|Industry|Other|Liquids|Bioenergy'	0	0	0
'Final Energy|Industry|Other|Liquids|Fossil'	0	0	0
'Final Energy|Industry|Other|Solids'	0	0	0
'Final Energy|Industry|Other|Solids|Bioenergy'	0	0	0
'Final Energy|Industry|Other|Solids|Fossil'	0	0	0
'Final Energy|Industry|Solids'	0	1	1
'Final Energy|Industry|Solids|Biomass'	0	0	0
'Final Energy|Industry|Solids|Coal'	0	0	0
'Final Energy|Industry|Steel|Electricity'	0	0	0
'Final Energy|Industry|Steel|Gases'	0	0	0
'Final Energy|Industry|Steel|Gases|Bioenergy'	0	0	0
'Final Energy|Industry|Steel|Gases|Fossil'	0	0	0
'Final Energy|Industry|Steel|Gases|Hydrogen synfuel'	0	0	0
'Final Energy|Industry|Steel|Heat'	0	0	0
'Final Energy|Industry|Steel|Hydrogen'	0	0	0
'Final Energy|Industry|Steel|Liquids'	0	0	0
'Final Energy|Industry|Steel|Liquids|Bioenergy'	0	0	0
'Final Energy|Industry|Steel|Liquids|Fossil'	0	0	0
'Final Energy|Industry|Steel|Liquids|Hydrogen synfuel'	0	0	0
'Final Energy|Industry|Steel|Other'	0	0	0
'Final Energy|Industry|Steel|Solids'	0	0	0
'Final Energy|Industry|Steel|Solids|Bioenergy'	0	0	0
'Final Energy|Industry|Steel|Solids|Fossil'	0	0	0
'Final Energy|Liquids'	1	0	1
'Final Energy|Non-Energy Use'	1	0	1
'Final Energy|Non-Energy Use|Biomass'	0	0	0
'Final Energy|Non-Energy Use|Coal'	0	0	0
'Final Energy|Non-Energy Use|Gas'	0	0	0
'Final Energy|Non-Energy Use|Oil'	0	0	0
'Final Energy|Other'	1	0	1
'Final Energy|Other Sector'	1	0	1
'Final Energy|Other Sector|Electricity'	0	0	0
'Final Energy|Other Sector|Gases'	0	0	0
'Final Energy|Other Sector|Heat'	0	0	0
'Final Energy|Other Sector|Hydrogen'	0	0	0
'Final Energy|Other Sector|Liquids'	0	0	0
'Final Energy|Other Sector|Other'	0	0	0
'Final Energy|Other Sector|Solids'	0	0	0
'Final Energy|Other Sector|Solids|Biomass'	0	0	0
'Final Energy|Other Sector|Solids|Biomass|Traditional'	0	0	0
'Final Energy|Other Sector|Solids|Coal'	0	0	0
'Final Energy|Residential and Commercial'	1	0	1
'Final Energy|Residential and Commercial|Appliances'	0	0	0
'Final Energy|Residential and Commercial|Commercial'	0	0	0
'Final Energy|Residential and Commercial|Commercial|Appliances'	0	0	0
'Final Energy|Residential and Commercial|Commercial|Cooling'	0	0	0
'Final Energy|Residential and Commercial|Commercial|Electricity'	0	0	0
'Final Energy|Residential and Commercial|Commercial|Gases'	0	0	0
'Final Energy|Residential and Commercial|Commercial|Heat'	0	0	0
'Final Energy|Residential and Commercial|Commercial|Heating'	0	0	0
'Final Energy|Residential and Commercial|Commercial|Heating|Cooking'	0	0	0
'Final Energy|Residential and Commercial|Commercial|Heating|Space'	0	0	0
'Final Energy|Residential and Commercial|Commercial|Heating|Water'	0	0	0
'Final Energy|Residential and Commercial|Commercial|Hydrogen'	0	0	0
'Final Energy|Residential and Commercial|Commercial|Lighting'	0	0	0
'Final Energy|Residential and Commercial|Commercial|Liquids'	0	0	0
'Final Energy|Residential and Commercial|Commercial|Other'	0	0	0
'Final Energy|Residential and Commercial|Commercial|Solids'	0	0	0
'Final Energy|Residential and Commercial|Commercial|Solids|Biomass'	0	0	0
'Final Energy|Residential and Commercial|Commercial|Solids|Biomass|Traditional'	0	0	0
'Final Energy|Residential and Commercial|Commercial|Solids|Coal'	0	0	0
'Final Energy|Residential and Commercial|Commercial|Water|Desalination'	0	0	0
'Final Energy|Residential and Commercial|Cooling'	0	0	0
'Final Energy|Residential and Commercial|Electricity'	0	1	1
'Final Energy|Residential and Commercial|Gases'	0	1	1
'Final Energy|Residential and Commercial|Heat'	0	1	1
'Final Energy|Residential and Commercial|Heating'	0	0	0
'Final Energy|Residential and Commercial|Heating|Cooking'	0	0	0
'Final Energy|Residential and Commercial|Heating|Space'	0	0	0
'Final Energy|Residential and Commercial|Heating|Water'	0	0	0
'Final Energy|Residential and Commercial|Hydrogen'	0	1	1
'Final Energy|Residential and Commercial|Lighting'	0	0	0
'Final Energy|Residential and Commercial|Liquids'	0	1	1
'Final Energy|Residential and Commercial|Other'	0	1	1
'Final Energy|Residential and Commercial|Residential'	0	0	0
'Final Energy|Residential and Commercial|Residential|Appliances'	0	0	0
'Final Energy|Residential and Commercial|Residential|Cooling'	0	0	0
'Final Energy|Residential and Commercial|Residential|Electricity'	0	0	0
'Final Energy|Residential and Commercial|Residential|Gases'	0	0	0
'Final Energy|Residential and Commercial|Residential|Heat'	0	0	0
'Final Energy|Residential and Commercial|Residential|Heating'	0	0	0
'Final Energy|Residential and Commercial|Residential|Heating|Cooking'	0	0	0
'Final Energy|Residential and Commercial|Residential|Heating|Space'	0	0	0
'Final Energy|Residential and Commercial|Residential|Heating|Water'	0	0	0
'Final Energy|Residential and Commercial|Residential|Hydrogen'	0	0	0
'Final Energy|Residential and Commercial|Residential|Lighting'	0	0	0
'Final Energy|Residential and Commercial|Residential|Liquids'	0	0	0
'Final Energy|Residential and Commercial|Residential|Other'	0	0	0
'Final Energy|Residential and Commercial|Residential|Solids'	0	0	0
'Final Energy|Residential and Commercial|Residential|Solids|Biomass'	0	0	0
'Final Energy|Residential and Commercial|Residential|Solids|Biomass|Traditional'	0	0	0
'Final Energy|Residential and Commercial|Residential|Solids|Coal'	0	0	0
'Final Energy|Residential and Commercial|Solids'	0	1	1
'Final Energy|Residential and Commercial|Solids|Biomass'	0	0	0
'Final Energy|Residential and Commercial|Solids|Biomass|Traditional'	0	0	0
'Final Energy|Residential and Commercial|Solids|Coal'	0	0	0
'Final Energy|Solar'	1	0	1
'Final Energy|Solids'	1	0	1
'Final Energy|Solids|Biomass'	0	1	1
'Final Energy|Solids|Biomass|Traditional'	0	1	1
'Final Energy|Solids|Coal'	0	1	1
'Final Energy|Transportation'	1	0	1
'Final Energy|Transportation|Aviation'	0	0	0
'Final Energy|Transportation|Aviation|Freight'	0	0	0
'Final Energy|Transportation|Aviation|Passenger'	0	0	0
'Final Energy|Transportation|Electricity'	0	1	1
'Final Energy|Transportation|Freight'	0	1	1
'Final Energy|Transportation|Freight|Electricity'	0	0	0
'Final Energy|Transportation|Freight|Gases'	0	0	0
'Final Energy|Transportation|Freight|Gases|Bioenergy'	0	0	0
'Final Energy|Transportation|Freight|Gases|Fossil'	0	0	0
'Final Energy|Transportation|Freight|Hydrogen'	0	0	0
'Final Energy|Transportation|Freight|Liquids'	0	0	0
'Final Energy|Transportation|Freight|Liquids|Bioenergy'	0	0	0
'Final Energy|Transportation|Freight|Liquids|Fossil synfuel'	0	0	0
'Final Energy|Transportation|Freight|Liquids|Oil'	0	0	0
'Final Energy|Transportation|Freight|Other'	0	0	0
'Final Energy|Transportation|Gases'	0	1	1
'Final Energy|Transportation|Gases|Bioenergy'	0	0	0
'Final Energy|Transportation|Gases|Fossil'	0	0	0
'Final Energy|Transportation|Hydrogen'	0	1	1
'Final Energy|Transportation|Liquids'	0	1	1
'Final Energy|Transportation|Liquids|Bioenergy'	0	1	1
'Final Energy|Transportation|Liquids|Coal'	0	0	0
'Final Energy|Transportation|Liquids|Fossil synfuel'	0	0	0
'Final Energy|Transportation|Liquids|Natural Gas'	0	0	0
'Final Energy|Transportation|Liquids|Oil'	0	1	1
'Final Energy|Transportation|Maritime'	0	0	0
'Final Energy|Transportation|Other'	0	0	0
'Final Energy|Transportation|Passenger'	0	0	0
'Final Energy|Transportation|Passenger|Electricity'	0	0	0
'Final Energy|Transportation|Passenger|Gases'	0	0	0
'Final Energy|Transportation|Passenger|Gases|Bioenergy'	0	0	0
'Final Energy|Transportation|Passenger|Gases|Fossil'	0	0	0
'Final Energy|Transportation|Passenger|Hydrogen'	0	0	0
'Final Energy|Transportation|Passenger|Liquids'	0	0	0
'Final Energy|Transportation|Passenger|Liquids|Bioenergy'	0	0	0
'Final Energy|Transportation|Passenger|Liquids|Fossil synfuel'	0	0	0
'Final Energy|Transportation|Passenger|Liquids|Oil'	0	0	0
'Final Energy|Transportation|Passenger|Other'	0	0	0
'Final Energy|Transportation|Rail'	0	0	0
'Final Energy|Transportation|Rail|Freight'	0	0	0
'Final Energy|Transportation|Rail|Passenger'	0	0	0
'Final Energy|Transportation|Road|Freight'	0	0	0
'Final Energy|Transportation|Road|Freight|Electric'	0	0	0
'Final Energy|Transportation|Road|Freight|FC'	0	0	0
'Final Energy|Transportation|Road|Freight|ICE'	0	0	0
'Final Energy|Transportation|Road|Passenger'	0	0	0
'Final Energy|Transportation|Road|Passenger|2W&3W'	0	0	0
'Final Energy|Transportation|Road|Passenger|Bus'	0	0	0
'Final Energy|Transportation|Road|Passenger|LDV'	0	0	0
'Food Demand'	0	1	1
'Food Demand|Crops'	0	1	1
'Food Demand|Livestock'	0	1	1
'Food Energy Supply'	0	0	0
'Food Energy Supply|Livestock'	0	0	0
'Forcing'	0	0	0
'Forcing|Aerosol'	0	0	0
'Forcing|Aerosol|BC'	0	0	0
'Forcing|Aerosol|Black and Organic Carbon'	0	0	0
'Forcing|Aerosol|Cloud Indirect'	0	0	0
'Forcing|Aerosol|OC'	0	0	0
'Forcing|Aerosol|Other'	0	0	0
'Forcing|Aerosol|Sulfate Direct'	0	0	0
'Forcing|Albedo Change and Mineral Dust'	0	0	0
'Forcing|CH4'	0	0	0
'Forcing|CO2'	0	0	0
'Forcing|F-Gases'	0	0	0
'Forcing|Kyoto Gases'	0	0	0
'Forcing|Montreal Gases'	0	0	0
'Forcing|N2O'	0	0	0
'Forcing|Other'	0	0	0
'Forcing|Tropospheric Ozone'	0	0	0
'Forestry Demand|Roundwood'	0	0	0
'Forestry Demand|Roundwood|Industrial Roundwood'	0	0	0
'Forestry Demand|Roundwood|Wood Fuel'	0	0	0
'Forestry Production|Roundwood'	0	0	0
'Forestry Production|Roundwood|Industrial Roundwood'	0	0	0
'Forestry Production|Roundwood|Wood Fuel'	0	0	0
'GDP|MER'	1	0	1
'GDP|PPP'	1	0	1
'Human Toxicity|Electricity'	0	0	0
'Import'	0	0	0
'Import|Agriculture'	0	0	0
'Import|Energy'	0	0	0
'Import|Industry'	0	0	0
'Import|Industry|Energy'	0	0	0
'Import|Industry|Energy Intensive'	0	0	0
'Import|Industry|Manufacturing'	0	0	0
'Import|Other'	0	0	0
'Interest Rate|Real'	0	0	0
'Investment'	0	0	0
'Investment|Energy Demand|Transportation|Freight|Road|HDT|EV'	0	0	0
'Investment|Energy Demand|Transportation|Freight|Road|HDT|ICE'	0	0	0
'Investment|Energy Demand|Transportation|Passenger|Road|LDV|EV'	0	0	0
'Investment|Energy Demand|Transportation|Passenger|Road|LDV|FCV'	0	0	0
'Investment|Energy Demand|Transportation|Passenger|Road|LDV|ICE'	0	0	0
'Investment|Energy Efficiency'	0	0	0
'Investment|Energy Supply'	0	1	1
'Investment|Energy Supply|CO2 Transport and Storage'	0	0	0
'Investment|Energy Supply|Electricity'	0	1	1
'Investment|Energy Supply|Electricity|Biomass'	0	0	0
'Investment|Energy Supply|Electricity|Biomass|w/ CCS'	0	0	0
'Investment|Energy Supply|Electricity|Biomass|w/o CCS'	0	0	0
'Investment|Energy Supply|Electricity|Coal'	0	0	0
'Investment|Energy Supply|Electricity|Coal|w/ CCS'	0	0	0
'Investment|Energy Supply|Electricity|Coal|w/o CCS'	0	0	0
'Investment|Energy Supply|Electricity|Electricity Storage'	0	0	0
'Investment|Energy Supply|Electricity|Fossil'	0	1	1
'Investment|Energy Supply|Electricity|Gas'	0	0	0
'Investment|Energy Supply|Electricity|Gas|w/ CCS'	0	0	0
'Investment|Energy Supply|Electricity|Gas|w/o CCS'	0	0	0
'Investment|Energy Supply|Electricity|Geothermal'	0	0	0
'Investment|Energy Supply|Electricity|Hydro'	0	0	0
'Investment|Energy Supply|Electricity|Non-Biomass Renewables'	0	1	1
'Investment|Energy Supply|Electricity|Non-fossil'	0	0	0
'Investment|Energy Supply|Electricity|Nuclear'	0	0	0
'Investment|Energy Supply|Electricity|Ocean'	0	0	0
'Investment|Energy Supply|Electricity|Oil'	0	0	0
'Investment|Energy Supply|Electricity|Oil|w/ CCS'	0	0	0
'Investment|Energy Supply|Electricity|Oil|w/o CCS'	0	0	0
'Investment|Energy Supply|Electricity|Other'	0	0	0
'Investment|Energy Supply|Electricity|Renewables (incl. Biomass)'	0	0	0
'Investment|Energy Supply|Electricity|Solar'	0	0	0
'Investment|Energy Supply|Electricity|Transmission and Distribution'	0	0	0
'Investment|Energy Supply|Electricity|Wind'	0	0	0
'Investment|Energy Supply|Extraction|Bioenergy'	0	0	0
'Investment|Energy Supply|Extraction|Coal'	0	0	0
'Investment|Energy Supply|Extraction|Fossil'	0	0	0
'Investment|Energy Supply|Extraction|Gas'	0	0	0
'Investment|Energy Supply|Extraction|Oil'	0	0	0
'Investment|Energy Supply|Extraction|Uranium'	0	0	0
'Investment|Energy Supply|Heat'	0	0	0
'Investment|Energy Supply|Hydrogen'	0	0	0
'Investment|Energy Supply|Hydrogen|Biomass'	0	0	0
'Investment|Energy Supply|Hydrogen|Electricity'	0	0	0
'Investment|Energy Supply|Hydrogen|Fossil'	0	0	0
'Investment|Energy Supply|Hydrogen|Other'	0	0	0
'Investment|Energy Supply|Hydrogen|Renewable'	0	0	0
'Investment|Energy Supply|Liquids'	0	0	0
'Investment|Energy Supply|Liquids|Biomass'	0	0	0
'Investment|Energy Supply|Liquids|Coal and Gas'	0	0	0
'Investment|Energy Supply|Liquids|Oil'	0	0	0
'Investment|Energy Supply|Other'	0	0	0
'Investment|Infrastructure|Residential and Commercial|Building Retrofits'	0	0	0
'Investment|Infrastructure|Residential and Commercial|High-Efficiency Buildings'	0	0	0
'Investment|Infrastructure|Transportation'	0	0	0
'Investment|RnD|Energy Supply'	0	0	0
'Land Cover'	0	1	1
'Land Cover|Built-up Area'	0	1	1
'Land Cover|Cropland'	0	1	1
'Land Cover|Cropland|Cereals'	0	0	0
'Land Cover|Cropland|Energy Crops'	0	1	1
'Land Cover|Cropland|Energy Crops|2nd generation'	0	0	0
'Land Cover|Cropland|Energy Crops|Irrigated'	0	0	0
'Land Cover|Cropland|Irrigated'	0	0	0
'Land Cover|Cropland|Rainfed'	0	0	0
'Land Cover|Forest'	0	1	1
'Land Cover|Forest|Afforestation and Reforestation'	0	0	0
'Land Cover|Forest|Forestry|Harvested Area'	0	0	0
'Land Cover|Forest|Managed'	0	0	0
'Land Cover|Forest|Natural Forest'	0	0	0
'Land Cover|Forest|Secondary'	0	0	0
'Land Cover|Other Arable Land'	0	1	1
'Land Cover|Other Land'	0	0	0
'Land Cover|Pasture'	0	1	1
'Lifetime|Electricity|Biomass|w/ CCS'	0	0	0
'Lifetime|Electricity|Biomass|w/o CCS'	0	0	0
'Lifetime|Electricity|Coal|w/ CCS'	0	0	0
'Lifetime|Electricity|Coal|w/o CCS'	0	0	0
'Lifetime|Electricity|Gas|w/ CCS'	0	0	0
'Lifetime|Electricity|Gas|w/o CCS'	0	0	0
'Lifetime|Electricity|Geothermal'	0	0	0
'Lifetime|Electricity|Hydro'	0	0	0
'Lifetime|Electricity|Nuclear'	0	0	0
'Lifetime|Electricity|Solar|CSP'	0	0	0
'Lifetime|Electricity|Solar|PV'	0	0	0
'Lifetime|Electricity|Wind'	0	0	0
'Lifetime|Electricity|Wind|Offshore'	0	0	0
'Lifetime|Electricity|Wind|Onshore'	0	0	0
'Lifetime|Gases|Biomass|w/o CCS'	0	0	0
'Lifetime|Gases|Coal|w/o CCS'	0	0	0
'Lifetime|Hydrogen|Biomass|w/ CCS'	0	0	0
'Lifetime|Hydrogen|Biomass|w/o CCS'	0	0	0
'Lifetime|Hydrogen|Coal|w/ CCS'	0	0	0
'Lifetime|Hydrogen|Coal|w/o CCS'	0	0	0
'Lifetime|Hydrogen|Electricity'	0	0	0
'Lifetime|Hydrogen|Gas|w/ CCS'	0	0	0
'Lifetime|Hydrogen|Gas|w/o CCS'	0	0	0
'Lifetime|Liquids|Biomass|w/ CCS'	0	0	0
'Lifetime|Liquids|Biomass|w/o CCS'	0	0	0
'Lifetime|Liquids|Coal|w/ CCS'	0	0	0
'Lifetime|Liquids|Coal|w/o CCS'	0	0	0
'Lifetime|Liquids|Gas|w/ CCS'	0	0	0
'Lifetime|Liquids|Gas|w/o CCS'	0	0	0
'Lifetime|Liquids|Oil'	0	0	0
'Material recycling|Chemicals'	0	0	0
'Material recycling|Plastics'	0	0	0
'OM Cost|Fixed|Electricity|Biomass|w/ CCS'	0	0	0
'OM Cost|Fixed|Electricity|Biomass|w/o CCS'	0	0	0
'OM Cost|Fixed|Electricity|Coal|w/ CCS'	0	0	0
'OM Cost|Fixed|Electricity|Coal|w/o CCS'	0	0	0
'OM Cost|Fixed|Electricity|Gas|w/ CCS'	0	0	0
'OM Cost|Fixed|Electricity|Gas|w/o CCS'	0	0	0
'OM Cost|Fixed|Electricity|Geothermal'	0	0	0
'OM Cost|Fixed|Electricity|Hydro'	0	0	0
'OM Cost|Fixed|Electricity|Nuclear'	0	0	0
'OM Cost|Fixed|Electricity|Solar|CSP'	0	0	0
'OM Cost|Fixed|Electricity|Solar|PV'	0	0	0
'OM Cost|Fixed|Electricity|Wind'	0	0	0
'OM Cost|Fixed|Electricity|Wind|Offshore'	0	0	0
'OM Cost|Fixed|Electricity|Wind|Onshore'	0	0	0
'OM Cost|Fixed|Gases|Biomass|w/o CCS'	0	0	0
'OM Cost|Fixed|Gases|Coal|w/o CCS'	0	0	0
'OM Cost|Fixed|Hydrogen|Biomass|w/ CCS'	0	0	0
'OM Cost|Fixed|Hydrogen|Biomass|w/o CCS'	0	0	0
'OM Cost|Fixed|Hydrogen|Coal|w/ CCS'	0	0	0
'OM Cost|Fixed|Hydrogen|Coal|w/o CCS'	0	0	0
'OM Cost|Fixed|Hydrogen|Electricity'	0	0	0
'OM Cost|Fixed|Hydrogen|Gas|w/ CCS'	0	0	0
'OM Cost|Fixed|Hydrogen|Gas|w/o CCS'	0	0	0
'OM Cost|Fixed|Liquids|Biomass|w/ CCS'	0	0	0
'OM Cost|Fixed|Liquids|Biomass|w/o CCS'	0	0	0
'OM Cost|Fixed|Liquids|Coal|w/ CCS'	0	0	0
'OM Cost|Fixed|Liquids|Coal|w/o CCS'	0	0	0
'OM Cost|Fixed|Liquids|Gas|w/ CCS'	0	0	0
'OM Cost|Fixed|Liquids|Gas|w/o CCS'	0	0	0
'OM Cost|Fixed|Liquids|Oil'	0	0	0
'Policy Cost|Additional Total Energy System Cost'	0	1	1
'Policy Cost|Area under MAC Curve'	0	1	1
'Policy Cost|Consumption Loss'	0	1	1
'Policy Cost|Default for CAV'	0	0	0
'Policy Cost|Equivalent Variation'	0	1	1
'Policy Cost|GDP Loss'	0	1	1
'Policy Cost|Other'	0	1	1
'Policy Cost|Welfare Change'	0	0	0
'Population'	1	0	1
'Population|Electricity Access'	0	0	0
'Population|Extreme poverty'	0	0	0
'Population|Female'	0	1	1
'Population|Male'	0	1	1
'Population|Relying on Solid Fuels'	0	0	0
'Population|Risk of Hunger'	0	1	1
'Population|Rural'	0	1	1
'Population|Urban'	0	1	1
'Population|Urban|Share'	0	1	1
'Population|Working Age'	0	0	0
'Premature Deaths|PM2.5'	0	0	0
'Price|Agriculture|Corn|Index'	0	0	0
'Price|Agriculture|Livestock|Index'	0	0	0
'Price|Agriculture|Non-Energy Crops and Livestock|Index'	0	0	0
'Price|Agriculture|Non-Energy Crops|Index'	0	0	0
'Price|Agriculture|Rice|Index'	0	0	0
'Price|Agriculture|Soybean|Index'	0	0	0
'Price|Agriculture|Wheat|Index'	0	0	0
'Price|Carbon'	1	0	1
'Price|Final Energy|Residential and Commercial|Residential|Electricity'	0	0	0
'Price|Final Energy|Residential and Commercial|Residential|Gases|Natural Gas'	0	0	0
'Price|Final Energy|Residential and Commercial|Residential|Liquids|Biomass'	0	0	0
'Price|Final Energy|Residential and Commercial|Residential|Liquids|Oil'	0	0	0
'Price|Final Energy|Residential and Commercial|Residential|Solids|Biomass'	0	0	0
'Price|Final Energy|Residential and Commercial|Residential|Solids|Coal'	0	0	0
'Price|Final Energy|Transportation|Electricity'	0	0	0
'Price|Final Energy|Transportation|Gases'	0	0	0
'Price|Final Energy|Transportation|Hydrogen'	0	0	0
'Price|Final Energy|Transportation|Liquids'	0	0	0
'Price|Final Energy|Transportation|Liquids|Bioenergy'	0	0	0
'Price|Primary Energy|Biomass'	0	0	0
'Price|Primary Energy|Coal'	0	0	0
'Price|Primary Energy|Gas'	0	0	0
'Price|Primary Energy|Oil'	0	0	0
'Price|Secondary Energy|Electricity'	0	0	0
'Price|Secondary Energy|Gases|Natural Gas'	0	0	0
'Price|Secondary Energy|Hydrogen'	0	0	0
'Price|Secondary Energy|Liquids'	0	0	0
'Price|Secondary Energy|Liquids|Biomass'	0	0	0
'Price|Secondary Energy|Liquids|Oil'	0	0	0
'Price|Secondary Energy|Solids|Biomass'	0	0	0
'Price|Secondary Energy|Solids|Coal'	0	0	0
'Primary Energy'	1	0	1
'Primary Energy|Biomass'	1	0	1
'Primary Energy|Biomass|1st Generation'	0	0	0
'Primary Energy|Biomass|Electricity'	0	1	1
'Primary Energy|Biomass|Electricity|w/ CCS'	0	1	1
'Primary Energy|Biomass|Electricity|w/o CCS'	0	1	1
'Primary Energy|Biomass|Energy Crops'	0	0	0
'Primary Energy|Biomass|Gases'	0	0	0
'Primary Energy|Biomass|Hydrogen'	0	0	0
'Primary Energy|Biomass|Liquids'	0	0	0
'Primary Energy|Biomass|Modern'	0	1	1
'Primary Energy|Biomass|Modern|w/ CCS'	0	1	1
'Primary Energy|Biomass|Modern|w/o CCS'	0	1	1
'Primary Energy|Biomass|Residues'	0	0	0
'Primary Energy|Biomass|Solids'	0	0	0
'Primary Energy|Biomass|Traditional'	0	1	1
'Primary Energy|Coal'	1	0	1
'Primary Energy|Coal|Electricity'	0	1	1
'Primary Energy|Coal|Electricity|w/ CCS'	0	1	1
'Primary Energy|Coal|Electricity|w/o CCS'	0	1	1
'Primary Energy|Coal|Gases'	0	0	0
'Primary Energy|Coal|Hydrogen'	0	0	0
'Primary Energy|Coal|Liquids'	0	0	0
'Primary Energy|Coal|Solids'	0	0	0
'Primary Energy|Coal|w/ CCS'	0	1	1
'Primary Energy|Coal|w/o CCS'	0	1	1
'Primary Energy|Fossil'	1	0	1
'Primary Energy|Fossil|w/ CCS'	1	0	1
'Primary Energy|Fossil|w/o CCS'	1	0	1
'Primary Energy|Gas'	1	0	1
'Primary Energy|Gas|Electricity'	0	1	1
'Primary Energy|Gas|Electricity|w/ CCS'	0	1	1
'Primary Energy|Gas|Electricity|w/o CCS'	0	1	1
'Primary Energy|Gas|Gases'	0	0	0
'Primary Energy|Gas|Hydrogen'	0	0	0
'Primary Energy|Gas|Liquids'	0	0	0
'Primary Energy|Gas|Solids'	0	0	0
'Primary Energy|Gas|w/ CCS'	0	1	1
'Primary Energy|Gas|w/o CCS'	0	1	1
'Primary Energy|Geothermal'	1	0	1
'Primary Energy|Hydro'	1	0	1
'Primary Energy|Non-Biomass Renewables'	1	0	1
'Primary Energy|Non-Biomass Renewables|Geothermal'	0	1	1
'Primary Energy|Non-Biomass Renewables|Hydro'	0	1	1
'Primary Energy|Non-Biomass Renewables|Ocean'	0	1	1
'Primary Energy|Non-Biomass Renewables|Solar'	0	1	1
'Primary Energy|Non-Biomass Renewables|Wind'	0	1	1
'Primary Energy|Nuclear'	1	0	1
'Primary Energy|Ocean'	1	0	1
'Primary Energy|Oil'	1	0	1
'Primary Energy|Oil|Electricity'	0	0	0
'Primary Energy|Oil|Electricity|w/ CCS'	0	0	0
'Primary Energy|Oil|Electricity|w/o CCS'	0	0	0
'Primary Energy|Oil|Gases'	0	0	0
'Primary Energy|Oil|Hydrogen'	0	0	0
'Primary Energy|Oil|Liquids'	0	0	0
'Primary Energy|Oil|Solids'	0	0	0
'Primary Energy|Oil|w/ CCS'	0	1	1
'Primary Energy|Oil|w/o CCS'	0	1	1
'Primary Energy|Other'	1	0	1
'Primary Energy|Renewables (incl. Biomass)'	0	0	0
'Primary Energy|Secondary Energy Trade'	1	0	1
'Primary Energy|Solar'	1	0	1
'Primary Energy|Wind'	1	0	1
'Production|Cement'	0	0	0
'Production|Chemicals'	0	0	0
'Production|Non-ferrous metals'	0	0	0
'Production|Pulp and Paper'	0	0	0
'Production|Steel'	0	0	0
'Resource|Extraction|Coal'	0	0	0
'Resource|Extraction|Fossil'	0	0	0
'Resource|Extraction|Gas'	0	0	0
'Resource|Extraction|Oil'	0	0	0
'Resource|Use|Mineral|Electricity'	0	0	0
'Revenue|government'	0	0	0
'Secondary Energy'	1	0	1
'Secondary Energy|Electricity'	1	0	1
'Secondary Energy|Electricity|Biomass'	1	0	1
'Secondary Energy|Electricity|Biomass|w/ CCS'	0	1	1
'Secondary Energy|Electricity|Biomass|w/o CCS'	0	1	1
'Secondary Energy|Electricity|Coal'	1	0	1
'Secondary Energy|Electricity|Coal|w/ CCS'	0	1	1
'Secondary Energy|Electricity|Coal|w/o CCS'	0	1	1
'Secondary Energy|Electricity|Curtailment'	0	0	0
'Secondary Energy|Electricity|Fossil'	0	0	0
'Secondary Energy|Electricity|Fossil|w/ CCS'	0	0	0
'Secondary Energy|Electricity|Fossil|w/o CCS'	0	0	0
'Secondary Energy|Electricity|Gas'	1	0	1
'Secondary Energy|Electricity|Gas|w/ CCS'	0	1	1
'Secondary Energy|Electricity|Gas|w/o CCS'	0	1	1
'Secondary Energy|Electricity|Geothermal'	0	1	1
'Secondary Energy|Electricity|Hydro'	0	1	1
'Secondary Energy|Electricity|Non-Biomass Renewables'	1	0	1
'Secondary Energy|Electricity|Nuclear'	1	0	1
'Secondary Energy|Electricity|Ocean'	0	1	1
'Secondary Energy|Electricity|Oil'	1	0	1
'Secondary Energy|Electricity|Oil|w/ CCS'	0	1	1
'Secondary Energy|Electricity|Oil|w/o CCS'	0	1	1
'Secondary Energy|Electricity|Other'	0	0	0
'Secondary Energy|Electricity|Renewables (incl. Biomass)'	0	0	0
'Secondary Energy|Electricity|Solar'	0	1	1
'Secondary Energy|Electricity|Solar|CSP'	0	0	0
'Secondary Energy|Electricity|Solar|PV'	0	0	0
'Secondary Energy|Electricity|Storage Losses'	0	0	0
'Secondary Energy|Electricity|Transmission Losses'	0	0	0
'Secondary Energy|Electricity|Wind'	0	1	1
'Secondary Energy|Electricity|Wind|Offshore'	0	0	0
'Secondary Energy|Electricity|Wind|Onshore'	0	0	0
'Secondary Energy|Gases'	1	0	1
'Secondary Energy|Gases|Biomass'	0	0	0
'Secondary Energy|Gases|Coal'	0	0	0
'Secondary Energy|Gases|Natural Gas'	0	0	0
'Secondary Energy|Gases|Other'	0	0	0
'Secondary Energy|Heat'	1	0	1
'Secondary Energy|Heat|Biomass'	0	0	0
'Secondary Energy|Heat|Coal'	0	0	0
'Secondary Energy|Heat|Fossil'	0	0	0
'Secondary Energy|Heat|Gas'	0	0	0
'Secondary Energy|Heat|Geothermal'	0	0	0
'Secondary Energy|Heat|Non-Biomass Renewables'	0	0	0
'Secondary Energy|Heat|Nuclear'	0	0	0
'Secondary Energy|Heat|Oil'	0	0	0
'Secondary Energy|Heat|Other'	0	0	0
'Secondary Energy|Heat|Renewables (incl. Biomass)'	0	0	0
'Secondary Energy|Heat|Solar'	0	0	0
'Secondary Energy|Hydrogen'	1	0	1
'Secondary Energy|Hydrogen|Biomass'	0	0	0
'Secondary Energy|Hydrogen|Biomass|w/ CCS'	0	0	0
'Secondary Energy|Hydrogen|Biomass|w/o CCS'	0	0	0
'Secondary Energy|Hydrogen|Coal'	0	0	0
'Secondary Energy|Hydrogen|Coal|w/ CCS'	0	0	0
'Secondary Energy|Hydrogen|Coal|w/o CCS'	0	0	0
'Secondary Energy|Hydrogen|Electricity'	0	0	0
'Secondary Energy|Hydrogen|Fossil'	0	0	0
'Secondary Energy|Hydrogen|Fossil|w/ CCS'	0	0	0
'Secondary Energy|Hydrogen|Fossil|w/o CCS'	0	0	0
'Secondary Energy|Hydrogen|Gas'	0	0	0
'Secondary Energy|Hydrogen|Gas|w/ CCS'	0	0	0
'Secondary Energy|Hydrogen|Gas|w/o CCS'	0	0	0
'Secondary Energy|Hydrogen|Non-Biomass Renewables'	0	0	0
'Secondary Energy|Hydrogen|Nuclear'	0	0	0
'Secondary Energy|Hydrogen|Oil'	0	0	0
'Secondary Energy|Hydrogen|Other'	0	0	0
'Secondary Energy|Hydrogen|Renewables (incl. Biomass)'	0	0	0
'Secondary Energy|Hydrogen|Solar'	0	0	0
'Secondary Energy|Liquids'	1	0	1
'Secondary Energy|Liquids|Biomass'	0	1	1
'Secondary Energy|Liquids|Biomass|1st Generation'	0	0	0
'Secondary Energy|Liquids|Biomass|Energy Crops'	0	0	0
'Secondary Energy|Liquids|Biomass|Other'	0	0	0
'Secondary Energy|Liquids|Biomass|Residues'	0	0	0
'Secondary Energy|Liquids|Biomass|w/ CCS'	0	1	1
'Secondary Energy|Liquids|Biomass|w/o CCS'	0	1	1
'Secondary Energy|Liquids|Coal'	0	1	1
'Secondary Energy|Liquids|Coal|w/ CCS'	0	1	1
'Secondary Energy|Liquids|Coal|w/o CCS'	0	1	1
'Secondary Energy|Liquids|Fossil'	0	0	0
'Secondary Energy|Liquids|Fossil|w/ CCS'	0	0	0
'Secondary Energy|Liquids|Fossil|w/o CCS'	0	0	0
'Secondary Energy|Liquids|Gas'	0	1	1
'Secondary Energy|Liquids|Gas|w/ CCS'	0	1	1
'Secondary Energy|Liquids|Gas|w/o CCS'	0	1	1
'Secondary Energy|Liquids|Oil'	0	1	1
'Secondary Energy|Liquids|Other'	0	0	0
'Secondary Energy|Other Carrier'	1	0	1
'Secondary Energy|Solids'	1	0	1
'Secondary Energy|Solids|Biomass'	0	0	0
'Secondary Energy|Solids|Coal'	0	0	0
'Specific Energy Consumption|Production|Cement'	0	0	0
'Specific Energy Consumption|Production|Chemicals'	0	0	0
'Specific Energy Consumption|Production|Chemicals|Ammonia'	0	0	0
'Specific Energy Consumption|Production|Chemicals|High value chemicals'	0	0	0
'Specific Energy Consumption|Production|Chemicals|Methanol'	0	0	0
'Specific Energy Consumption|Production|Steel'	0	0	0
'Subsidies|Energy'	0	0	0
'Subsidies|Energy|Fossil'	0	0	0
'Temperature|Global Mean'	0	1	1
'Trade'	0	0	0
'Trade|Primary Energy|Biomass|Volume'	0	0	0
'Trade|Primary Energy|Coal|Volume'	0	0	0
'Trade|Primary Energy|Gas|Volume'	0	0	0
'Trade|Primary Energy|Oil|Volume'	0	0	0
'Trade|Secondary Energy|Electricity|Volume'	0	0	0
'Trade|Secondary Energy|Hydrogen|Volume'	0	0	0
'Trade|Secondary Energy|Liquids|Biomass|Volume'	0	0	0
'Trade|Secondary Energy|Liquids|Coal|Volume'	0	0	0
'Trade|Secondary Energy|Liquids|Oil|Volume'	0	0	0
'Trade|Uranium|Mass'	0	0	0
'Transport|Stock|Road'	0	0	0
'Transport|Stock|Road|Freight'	0	0	0
'Transport|Stock|Road|Passenger'	0	0	0
'Transport|Stock|Road|Passenger|2W&3W'	0	0	0
'Transport|Stock|Road|Passenger|Bus'	0	0	0
'Transport|Stock|Road|Passenger|LDV'	0	0	0
'Unemployment'	0	0	0
'Unemployment|Rate'	0	0	0
'Value Added|Agriculture'	0	1	1
'Value Added|Industry'	0	1	1
'Value Added|Industry|Energy'	0	0	0
'Value Added|Industry|Energy Intensive'	0	0	0
'Value Added|Industry|Manufacturing'	0	0	0
'Value Added|Residential and Commercial|Commercial'	0	1	1
'Water Consumption'	0	0	0
'Water Consumption|Electricity'	0	0	0
'Water Consumption|Electricity w/o Hydro'	0	0	0
'Water Consumption|Electricity|Biomass'	0	0	0
'Water Consumption|Electricity|Biomass|w/ CCS'	0	0	0
'Water Consumption|Electricity|Biomass|w/o CCS'	0	0	0
'Water Consumption|Electricity|Coal'	0	0	0
'Water Consumption|Electricity|Coal|w/ CCS'	0	0	0
'Water Consumption|Electricity|Coal|w/o CCS'	0	0	0
'Water Consumption|Electricity|Cooling Pond'	0	0	0
'Water Consumption|Electricity|Dry Cooling'	0	0	0
'Water Consumption|Electricity|Fossil'	0	0	0
'Water Consumption|Electricity|Fossil|w/ CCS'	0	0	0
'Water Consumption|Electricity|Fossil|w/o CCS'	0	0	0
'Water Consumption|Electricity|Gas'	0	0	0
'Water Consumption|Electricity|Gas|w/ CCS'	0	0	0
'Water Consumption|Electricity|Gas|w/o CCS'	0	0	0
'Water Consumption|Electricity|Geothermal'	0	0	0
'Water Consumption|Electricity|Hydro'	0	0	0
'Water Consumption|Electricity|Non-Biomass Renewables'	0	0	0
'Water Consumption|Electricity|Nuclear'	0	0	0
'Water Consumption|Electricity|Oil'	0	0	0
'Water Consumption|Electricity|Oil|w/ CCS'	0	0	0
'Water Consumption|Electricity|Oil|w/o CCS'	0	0	0
'Water Consumption|Electricity|Once Through'	0	0	0
'Water Consumption|Electricity|Other'	0	0	0
'Water Consumption|Electricity|Sea Cooling'	0	0	0
'Water Consumption|Electricity|Solar'	0	0	0
'Water Consumption|Electricity|Solar|CSP'	0	0	0
'Water Consumption|Electricity|Solar|PV'	0	0	0
'Water Consumption|Electricity|Wet Tower'	0	0	0
'Water Consumption|Electricity|Wind'	0	0	0
'Water Consumption|Extraction'	0	0	0
'Water Consumption|Extraction|Coal'	0	0	0
'Water Consumption|Extraction|Gas'	0	0	0
'Water Consumption|Extraction|Oil'	0	0	0
'Water Consumption|Extraction|Uranium'	0	0	0
'Water Consumption|Gases'	0	0	0
'Water Consumption|Gases|Biomass'	0	0	0
'Water Consumption|Gases|Coal'	0	0	0
'Water Consumption|Heat'	0	0	0
'Water Consumption|Heat|Biomass'	0	0	0
'Water Consumption|Heat|Coal'	0	0	0
'Water Consumption|Heat|Gas'	0	0	0
'Water Consumption|Heat|Geothermal'	0	0	0
'Water Consumption|Heat|Oil'	0	0	0
'Water Consumption|Heat|Other'	0	0	0
'Water Consumption|Hydrogen'	0	0	0
'Water Consumption|Hydrogen|Biomass'	0	0	0
'Water Consumption|Hydrogen|Biomass|w/ CCS'	0	0	0
'Water Consumption|Hydrogen|Biomass|w/o CCS'	0	0	0
'Water Consumption|Hydrogen|Coal'	0	0	0
'Water Consumption|Hydrogen|Coal|w/ CCS'	0	0	0
'Water Consumption|Hydrogen|Coal|w/o CCS'	0	0	0
'Water Consumption|Hydrogen|Electricity'	0	0	0
'Water Consumption|Hydrogen|Fossil'	0	0	0
'Water Consumption|Hydrogen|Fossil|w/ CCS'	0	0	0
'Water Consumption|Hydrogen|Fossil|w/o CCS'	0	0	0
'Water Consumption|Hydrogen|Gas'	0	0	0
'Water Consumption|Hydrogen|Gas|w/ CCS'	0	0	0
'Water Consumption|Hydrogen|Gas|w/o CCS'	0	0	0
'Water Consumption|Industrial Water'	0	0	0
'Water Consumption|Irrigation'	0	0	0
'Water Consumption|Liquids'	0	0	0
'Water Consumption|Liquids|Biomass'	0	0	0
'Water Consumption|Liquids|Biomass|w/ CCS'	0	0	0
'Water Consumption|Liquids|Biomass|w/o CCS'	0	0	0
'Water Consumption|Liquids|Coal'	0	0	0
'Water Consumption|Liquids|Coal|w/ CCS'	0	0	0
'Water Consumption|Liquids|Coal|w/o CCS'	0	0	0
'Water Consumption|Liquids|Fossil'	0	0	0
'Water Consumption|Liquids|Fossil|w/ CCS'	0	0	0
'Water Consumption|Liquids|Fossil|w/o CCS'	0	0	0
'Water Consumption|Liquids|Gas'	0	0	0
'Water Consumption|Liquids|Gas|w/ CCS'	0	0	0
'Water Consumption|Liquids|Gas|w/o CCS'	0	0	0
'Water Consumption|Liquids|Oil'	0	0	0
'Water Consumption|Municipal Water'	0	0	0
'Water Withdrawal'	0	0	0
'Water Withdrawal|Electricity'	0	0	0
'Water Withdrawal|Electricity|Biomass'	0	0	0
'Water Withdrawal|Electricity|Biomass|w/ CCS'	0	0	0
'Water Withdrawal|Electricity|Biomass|w/o CCS'	0	0	0
'Water Withdrawal|Electricity|Coal'	0	0	0
'Water Withdrawal|Electricity|Coal|w/ CCS'	0	0	0
'Water Withdrawal|Electricity|Coal|w/o CCS'	0	0	0
'Water Withdrawal|Electricity|Cooling Pond'	0	0	0
'Water Withdrawal|Electricity|Dry Cooling'	0	0	0
'Water Withdrawal|Electricity|Fossil'	0	0	0
'Water Withdrawal|Electricity|Fossil|w/ CCS'	0	0	0
'Water Withdrawal|Electricity|Fossil|w/o CCS'	0	0	0
'Water Withdrawal|Electricity|Gas'	0	0	0
'Water Withdrawal|Electricity|Gas|w/ CCS'	0	0	0
'Water Withdrawal|Electricity|Gas|w/o CCS'	0	0	0
'Water Withdrawal|Electricity|Geothermal'	0	0	0
'Water Withdrawal|Electricity|Hydro'	0	0	0
'Water Withdrawal|Electricity|Non-Biomass Renewables'	0	0	0
'Water Withdrawal|Electricity|Nuclear'	0	0	0
'Water Withdrawal|Electricity|Ocean'	0	0	0
'Water Withdrawal|Electricity|Oil'	0	0	0
'Water Withdrawal|Electricity|Oil|w/ CCS'	0	0	0
'Water Withdrawal|Electricity|Oil|w/o CCS'	0	0	0
'Water Withdrawal|Electricity|Once Through'	0	0	0
'Water Withdrawal|Electricity|Other'	0	0	0
'Water Withdrawal|Electricity|Sea Cooling'	0	0	0
'Water Withdrawal|Electricity|Solar'	0	0	0
'Water Withdrawal|Electricity|Solar|CSP'	0	0	0
'Water Withdrawal|Electricity|Solar|PV'	0	0	0
'Water Withdrawal|Electricity|Wet Tower'	0	0	0
'Water Withdrawal|Electricity|Wind'	0	0	0
'Water Withdrawal|Extraction'	0	0	0
'Water Withdrawal|Extraction|Coal'	0	0	0
'Water Withdrawal|Extraction|Gas'	0	0	0
'Water Withdrawal|Extraction|Oil'	0	0	0
'Water Withdrawal|Extraction|Uranium'	0	0	0
'Water Withdrawal|Gases'	0	0	0
'Water Withdrawal|Gases|Biomass'	0	0	0
'Water Withdrawal|Gases|Coal'	0	0	0
'Water Withdrawal|Heat'	0	0	0
'Water Withdrawal|Heat|Biomass'	0	0	0
'Water Withdrawal|Heat|Coal'	0	0	0
'Water Withdrawal|Heat|Gas'	0	0	0
'Water Withdrawal|Heat|Geothermal'	0	0	0
'Water Withdrawal|Heat|Oil'	0	0	0
'Water Withdrawal|Heat|Other'	0	0	0
'Water Withdrawal|Hydrogen'	0	0	0
'Water Withdrawal|Hydrogen|Biomass'	0	0	0
'Water Withdrawal|Hydrogen|Biomass|w/ CCS'	0	0	0
'Water Withdrawal|Hydrogen|Biomass|w/o CCS'	0	0	0
'Water Withdrawal|Hydrogen|Coal'	0	0	0
'Water Withdrawal|Hydrogen|Coal|w/ CCS'	0	0	0
'Water Withdrawal|Hydrogen|Coal|w/o CCS'	0	0	0
'Water Withdrawal|Hydrogen|Electricity'	0	0	0
'Water Withdrawal|Hydrogen|Fossil'	0	0	0
'Water Withdrawal|Hydrogen|Fossil|w/ CCS'	0	0	0
'Water Withdrawal|Hydrogen|Fossil|w/o CCS'	0	0	0
'Water Withdrawal|Hydrogen|Gas'	0	0	0
'Water Withdrawal|Hydrogen|Gas|w/ CCS'	0	0	0
'Water Withdrawal|Hydrogen|Gas|w/o CCS'	0	0	0
'Water Withdrawal|Industrial Water'	0	0	0
'Water Withdrawal|Irrigation'	0	0	0
'Water Withdrawal|Liquids'	0	0	0
'Water Withdrawal|Liquids|Biomass'	0	0	0
'Water Withdrawal|Liquids|Biomass|w/ CCS'	0	0	0
'Water Withdrawal|Liquids|Biomass|w/o CCS'	0	0	0
'Water Withdrawal|Liquids|Coal'	0	0	0
'Water Withdrawal|Liquids|Coal|w/ CCS'	0	0	0
'Water Withdrawal|Liquids|Coal|w/o CCS'	0	0	0
'Water Withdrawal|Liquids|Fossil'	0	0	0
'Water Withdrawal|Liquids|Fossil|w/ CCS'	0	0	0
'Water Withdrawal|Liquids|Fossil|w/o CCS'	0	0	0
'Water Withdrawal|Liquids|Gas'	0	0	0
'Water Withdrawal|Liquids|Gas|w/ CCS'	0	0	0
'Water Withdrawal|Liquids|Gas|w/o CCS'	0	0	0
'Water Withdrawal|Liquids|Oil'	0	0	0
'Water Withdrawal|Municipal Water'	0	0	0
'Yield|Bioenergy|2nd generation'	0	0	0
'Yield|Cereal'	0	0	0
'Yield|Oilcrops'	0	0	0
'Yield|Sugarcrops'	0	0	0
Sum	79	201	280

## Sheet: readme
Core' variables in the AR6 scenarios databse and Tiers
Information is based on the AR6 WGIII common scenarios reporting template
Scenario reporting templates are available from https://data.ene.iiasa.ac.at/ar6-scenario-submission/#/about
